# Supplementary material for: Investigating Moorella thermoacetica metabolism with a genome-scale constraint-based metabolic model
Source: Royal Society of Chemistry journal article supplement (doi:10.1039/c5ib00095e), 2015-01-01
Supplement: c5ib00095e4.xlsx [file c5ib00095e4.xlsx]

## Sheet: Contents
This file contains 5 tables:
Table S1. Thermodynamically infeasible loop for the Mock et al proposed mechanism of ETC
Table S2. Thermodynamically infeasible loop for the Schuchmann and Muller proposed mechanism of ETC
Table S3. Genes, proteins, and reactions of M. thermoacetica metabolic model (iAI558)
Table S4. Metabolites of M. thermoacetica metabolic model (iAI558)
Table S5. Constraints of M. thermoacetica metabolic model (iAI558) used for growth simulations
Table S6. Flux variability analysis of M. thermoacetica metabolic model (iAI558) for heterotrophic and autotrophic growth simulations

## Sheet: Table S1
Table S1. Thermodynamically infeasible loop for the Mock et al* proposed mechanism of ETC
Reaction Abbreviation	Reaction Formula	Reaction Flux (mmol/gDCW.h)
ATPM	h2o[c] + atp[c] <=> pi[c] + h[c] + adp[c]	500
FHL	4 h[c] + for[c] -> 2 h[e] + co2[c] + h2[c]	1000
HDH1	nadp[c] + h2[c] -> nadph[c] + 2 h[c]	1000
ATPS4r	pi[c] + adp[c] + 4 h[e] <=> h2o[c] + atp[c] + 3 h[c]	500
FDH	nadph[c] + co2[c] -> nadp[c] + for[c]	1000
ASPTA	asp-L[c] + akg[c] <=> glu-L[c] + oaa[c]	1000
TRPS1	ser-L[c] + 3ig3p[c] <=> h2o[c] + trp-L[c] + g3p[c]	1000
NADK	atp[c] + nad[c] <=> nadp[c] + h[c] + adp[c]	1000
G3PD2	nadp[c] + glyc3p[c] <=> nadph[c] + h[c] + dhap[c]	1000
GK1	atp[c] + gmp[c] <=> gdp[c] + adp[c]	1000
NDPK1	atp[c] + gdp[c] <=> gtp[c] + adp[c]	1000
CTPS2	h2o[c] + atp[c] + gln-L[c] + utp[c] -> glu-L[c] + ctp[c] + pi[c] + 2 h[c] + adp[c]	1000
GLUSy	2 glu-L[c] + nadp[c] <=> nadph[c] + gln-L[c] + h[c] + akg[c]	1000
G6PDH	nadp[c] + g6p[c] <=> nadph[c] + h[c] + 6pgl[c]	1000
GLYCTO3	mqn8[c] + glyclt[c] -> mql8[c] + glx[c]	1000
GLYCTO4	glyclt[c] + 2dmmq8[c] -> glx[c] + 2dmmql8[c]	1000
GLYD	nad[c] + glyc-R[c] <=> h[c] + nadh[c] + hpyr[c]	1000
NADK1	gtp[c] + nad[c] <=> gdp[c] + nadp[c] + h[c]	1000
NADK2	datp[c] + nad[c] <=> nadp[c] + h[c] + dadp[c]	1000
DMSOR1	mql8[c] + dmso[c] <=> h2o[c] + mqn8[c] + dms[c]	1000
TMAOR2	h[c] + 2dmmql8[c] + tmao[c] <=> h2o[c] + 2dmmq8[c] + tma[c]	1000
*J. Mock, S. Wang, H. Huang, J. Kahnt and R. K. Thauer, J. Bacteriol., 2014, 196, 3303-3314.

## Sheet: Table S2
Table S2. Thermodynamically infeasible loop for the Schuchmann and Muller* proposed mechanism of ETC
Reaction Abbreviation	Reaction Formula	Reaction Flux (mmol/gDCW.h)
ATPM	h2o[c] + atp[c] <=> pi[c] + h[c] + adp[c]	750
FRHD	8 h[c] + 2 fdxrd[c] <=> 4 h[e] + 2 fdxox[c] + 2 h2[c]	1000
HYDFDNr	2 nad[c] + 2 fdxox[c] + 4 h2[c] <=> 8 h[c] + 2 nadh[c] + 2 fdxrd[c]	500
FRNDPRr	2 nadph[c] + nad[c] + fdxox[c] <=> 2 nadp[c] + h[c] + nadh[c] + fdxrd[c]	1000
ATPS4r	pi[c] + adp[c] + 4 h[e] <=> h2o[c] + atp[c] + 3 h[c]	750
NDPK7	atp[c] + dcdp[c] <=> dctp[c] + adp[c]	1000
CTPS2	h2o[c] + atp[c] + gln-L[c] + utp[c] -> glu-L[c] + ctp[c] + pi[c] + 2 h[c] + adp[c]	1000
GLUSy	2 glu-L[c] + nadp[c] <=> nadph[c] + gln-L[c] + h[c] + akg[c]	1000
G6PDH	nadp[c] + g6p[c] <=> nadph[c] + h[c] + 6pgl[c]	1000
GLYCTO3	mqn8[c] + glyclt[c] -> mql8[c] + glx[c]	1000
GLYCTO4	glyclt[c] + 2dmmq8[c] -> glx[c] + 2dmmql8[c]	1000
HPYRRy	nadp[c] + glyc-R[c] <=> nadph[c] + h[c] + hpyr[c]	1000
NADK1	gtp[c] + nad[c] <=> gdp[c] + nadp[c] + h[c]	1000
NADK4	dctp[c] + nad[c] <=> nadp[c] + h[c] + dcdp[c]	1000
DMSOR2	2dmmql8[c] + dmso[c] <=> h2o[c] + 2dmmq8[c] + dms[c]	1000
TMAOR1	h[c] + mql8[c] + tmao[c] <=> h2o[c] + mqn8[c] + tma[c]	1000
EX_h(e)	h[e] <=>	1000
ASPTA	asp-L[c] + akg[c] <=> glu-L[c] + oaa[c]	1000
TRPS1	ser-L[c] + 3ig3p[c] <=> h2o[c] + trp-L[c] + g3p[c]	1000
NADK	atp[c] + nad[c] <=> nadp[c] + h[c] + adp[c]	1000
G3PD2	nadp[c] + glyc3p[c] <=> nadph[c] + h[c] + dhap[c]	1000
NDPK1	atp[c] + gdp[c] <=> gtp[c] + adp[c]	1000
*K. Schuchmann and V. Muller, Nat Rev Micro, 2014, 12, 809-821.

## Sheet: Table S3
Table S3. Genes, proteins, and reactions of M. thermoacetica metabolic model (iAI558)
Reaction name	Reaction description	Formula	Gene-reaction association	Genes	Proteins	Subsystem	Reversible	LB	UB	Objective	EC Number
BIO_MT	Moorella_biomass	55 h2o[c] + 55 atp[c] + 0.2795 glu-L[c] + 0.0006 nadph[c] + 0.1469 gln-L[c] + 0.0133 amp[c] + 0.0291 utp[c] + 0.0925 met-L[c] + 0.1807 ser-L[c] + 0.0006 gdp[c] + 0.0369 gtp[c] + 0.0015 gmp[c] + 0.187 asp-L[c] + 0.4288 ala-L[c] + 0.1785 lys-L[c] + 0.0029 cmp[c] + 0.0007 cdp[c] + 0.284 arg-L[c] + 0.0368 ctp[c] + 0.126 asn-L[c] + 0.0468 trp-L[c] + 0.1417 phe-L[c] + 0.1257 tyr-L[c] + 0.0439 cys-L[c] …				Exchange	0	0	1000	0	N/A
EX_glc-D(e)	D-glucose exchange	glc-D[e] <=>				Exchange	1	-1000	1000	0	N/A
EX_fru(e)	D-Fructose exchange	fru[e] <=>				Exchange	1	-1000	1000	0	N/A
EX_xyl-D(e)	D-Xylose exchange	xyl-D[e] <=>				Exchange	1	-1000	1000	0	N/A
EX_nac(e)	Nicotinate exchange	nac[e] <=>				Exchange	1	-1000	1000	0	N/A
EX_co2(e)	CO2 exchange	co2[e] <=>				Exchange	1	-1000	1000	0	N/A
EX_co(e)	Carbon monoxide exchange	co[e] <=>				Exchange	1	-1000	1000	0	N/A
EX_h2(e)	H2 exchange	h2[e] <=>				Exchange	1	-1000	1000	0	N/A
EX_meoh(e)	Methanol exchange	meoh[e] <=>				Exchange	1	-1000	1000	0	N/A
EX_ac(e)	Acetate exchange	ac[e] <=>				Exchange	1	-1000	1000	0	N/A
EX_ca2(e)	Calcium exchange	ca2[e] <=>				Exchange	1	-1000	1000	0	N/A
EX_cd2(e)	Cadmium exchange	cd2[e] <=>				Exchange	1	-1000	1000	0	N/A
EX_cl(e)	Chloride exchange	cl[e] <=>				Exchange	1	-1000	1000	0	N/A
EX_cobalt2(e)	Cobalt exchange	cobalt2[e] <=>				Exchange	1	-1000	1000	0	N/A
EX_cu2(e)	Copper2 exchange	cu2[e] <=>				Exchange	1	-1000	1000	0	N/A
EX_fe2(e)	Fe2+ exchange	fe2[e] <=>				Exchange	1	-1000	1000	0	N/A
EX_fe3(e)	Fe3+ exchange	fe3[e] <=>				Exchange	1	-1000	1000	0	N/A
EX_h(e)	H+ exchange	h[e] <=>				Exchange	1	-1000	1000	0	N/A
EX_h2o(e)	H2O exchange	h2o[e] <=>				Exchange	1	-1000	1000	0	N/A
EX_h2s(e)	H2S exchange	h2s[e] <=>				Exchange	1	-1000	1000	0	N/A
EX_hg2(e)	Hg2+ exchange	hg2[e] <=>				Exchange	1	-1000	1000	0	N/A
EX_k(e)	Potassium exchange	k[e] <=>				Exchange	1	-1000	1000	0	N/A
EX_mg2(e)	Magnesium exchange	mg2[e] <=>				Exchange	1	-1000	1000	0	N/A
EX_mn2(e)	Manganese exchange	mn2[e] <=>				Exchange	1	-1000	1000	0	N/A
EX_mobd(e)	Molybdate exchange	mobd[e] <=>				Exchange	1	-1000	1000	0	N/A
EX_mops(e)	MOPS exchange	mops[e] <=>				Exchange	1	-1000	1000	0	N/A
EX_mso3(e)	Methanesulfonic exchange	mso3[e] <=>				Exchange	1	-1000	1000	0	N/A
EX_na1(e)	Sodium exchange	na1[e] <=>				Exchange	1	-1000	1000	0	N/A
EX_nh4(e)	Ammonia exchange	nh4[e] <=>				Exchange	1	-1000	1000	0	N/A
EX_no2(e)	Nitrite exchange	no2[e] <=>				Exchange	1	-1000	1000	0	N/A
EX_no3(e)	Nitrate exchange	no3[e] <=>				Exchange	1	-1000	1000	0	N/A
EX_pb2(e)	Lead exchange	Pb[e] <=>				Exchange	1	-1000	1000	0	N/A
EX_pi(e)	Orthophosphate exchange	pi[e] <=>				Exchange	1	-1000	1000	0	N/A
EX_ppi(e)	Pyrophosphate exchange	ppi[e] <=>				Exchange	1	-1000	1000	0	N/A
EX_so4(e)	Sulfate exchange	so4[e] <=>				Exchange	1	-1000	1000	0	N/A
EX_zn2(e)	Zinc exchange	zn2[e] <=>				Exchange	1	-1000	1000	0	N/A
EX_btn(e)	Biotin exchange	btn[e] <=>				Exchange	1	-1000	1000	0	N/A
EX_buts(e)	butanesulfonate exchange	buts[e] <=>				Exchange	1	-1000	1000	0	N/A
EX_eths(e)	ethanesulfonate exchange	eths[e] <=>				Exchange	1	-1000	1000	0	N/A
EX_cbl1(e)	Cob(I)alamin exchange	cbl1[e] <=>				Exchange	1	-1000	1000	0	N/A
EX_cbl2(e)	Cob(II)alamin exchange	cbl2[e] <=>				Exchange	1	-1000	1000	0	N/A
EX_cbl3(e)	Cob(III)alamin exchange	cbl3[e] <=>				Exchange	1	-1000	1000	0	N/A
EX_galctr-D(e)	D-Galactarate exchange	galctr-D[e] <=>				Exchange	1	-1000	1000	0	N/A
EX_glcr(e)	D-Glucarate exchange	glcr[e] <=>				Exchange	1	-1000	1000	0	N/A
EX_glyc3p(e)	sn-Glycerol 3-phosphate exchange	glyc3p[e] <=>				Exchange	1	-1000	1000	0	N/A
EX_glyclt(e)	Glycolate exchange	glyclt[e] <=>				Exchange	1	-1000	1000	0	N/A
EX_hexs(e)	hexanesulfonate exchange	hexs[e] <=>				Exchange	1	-1000	1000	0	N/A
EX_hxan(e)	Hypoxanthine exchange	hxan[e] <=>				Exchange	1	-1000	1000	0	N/A
EX_istnt(e)	2-Hydroxyethane exchange	istnt[e] <=>				Exchange	1	-1000	1000	0	N/A
EX_lac-L(e)	L-lactate exchange	lac-L[e] <=>				Exchange	1	-1000	1000	0	N/A
EX_Lcyst(e)	L-Cysteate exchange	Lcyst[e] <=>				Exchange	1	-1000	1000	0	N/A
EX_met-D(e)	D-Methionine exchange	met-D[e] <=>				Exchange	1	-1000	1000	0	N/A
EX_metox(e)	L-Methionine-S-oxide exchange	metox[e] <=>				Exchange	1	-1000	1000	0	N/A
EX_metox-R(e)	L-methionine R-oxide exchange	metox-R[e] <=>				Exchange	1	-1000	1000	0	N/A
EX_rib-D(e)	D-Ribose exchange	rib-D[e] <=>				Exchange	1	-1000	1000	0	N/A
EX_spmd(e)	Spermidine exchange	spmd[e] <=>				Exchange	1	-1000	1000	0	N/A
EX_sula(e)	Sulfoacetate exchange	sula[e] <=>				Exchange	1	-1000	1000	0	N/A
EX_taur(e)	Taurine exchange	taur[e] <=>				Exchange	1	-1000	1000	0	N/A
EX_xan(e)	Xanthine exchange	xan[e] <=>				Exchange	1	-1000	1000	0	N/A
EX_for(e)	Formate exchange	for[e] <=>				Exchange	1	-1000	1000	0	N/A
4HTHRS	O-Phospho-4-hydroxy-L-threonine phospho-lyase (adding water)	h2o[c] + phthr[c] -> pi[c] + h[c] + 4hthr[c]	( ( Moth_1306 ) or ( Moth_1998 ) )	Moth_1306 Moth_1998		Amino Acid Metabolism	0	0	1000	0	4.2.3.1
ACGK	acetylglutamate kinase	h[c] + acglu[c] + atp[c] <=> acg5p[c] + adp[c]	Moth_2288	Moth_2288		Amino Acid Metabolism	1	-1000	1000	0	2.7.2.8
ACGS	Acetyl-CoA:L-glutamate N-acetyltransferase	glu-L[c] + accoa[c] -> h[c] + acglu[c] + coa[c]	Moth_2289	Moth_2289		Amino Acid Metabolism	0	0	1000	0	2.3.1.1
ACHBS	2-aceto-2-hydroxybutanoate synthase	2obut[c] + h[c] + pyr[c] -> 2ahbut[c] + co2[c]	( Moth_2256 and Moth_2257 and Moth_2258 )	Moth_2256 Moth_2257 Moth_2258		Amino Acid Metabolism	0	0	1000	0	Undetermined
ACLS	acetolactate synthase (Also catalyzes ACHBS)	h[c] + 2 pyr[c] -> alac-S[c] + co2[c]	( Moth_2256 and Moth_2257 and Moth_2258 )	Moth_2256 Moth_2257 Moth_2258		Amino Acid Metabolism	0	0	1000	0	4.1.3.18
ACODA	N2-Acetyl-L-ornithine amidohydrolase	h2o[c] + acorn[c] <=> ac[c] + orn[c]	( ( Moth_1646 ) or ( Moth_0710 ) )	Moth_1646 Moth_0710		Amino Acid Metabolism	1	-1000	1000	0	3.5.1.14
ACOTA	acetylornithine transaminase	akg[c] + acorn[c] <=> glu-L[c] + acg5sa[c]	Moth_2287	Moth_2287		Amino Acid Metabolism	1	-1000	1000	0	2.6.1.11
ADMDC	adenosylmethionine decarboxylase	h[c] + amet[c] -> ametam[c] + co2[c]	Moth_1282	Moth_1282		Amino Acid Metabolism	0	0	1000	0	4.1.1.50
AGMT	Agmatine amidinohydrolase	agm[c] + h2o[c] <=> ptrc[c] + urea[c]	Moth_1815	Moth_1815		Amino Acid Metabolism	1	-1000	1000	0	3.5.3.11
AGPR	N-Acetyl-L-glutamate-5-semialdehyde:NADP+ 5-oxidoreductase	acg5p[c] + nadph[c] -> pi[c] + nadp[c] + acg5sa[c]	Moth_2290	Moth_2290		Amino Acid Metabolism	0	0	1000	0	1.2.1.38
AHSERL4	cysteine synthase (Thiosulfate)	acser[c] + trdrd[c] + tsul[c] <=> ac[c] + trdox[c] + so3[c] + cys-L[c]	( ( Moth_1706 ) or ( Moth_1971 ) or ( Moth_2000 ) )	Moth_1706 Moth_1971 Moth_2000		Amino Acid Metabolism	1	-1000	1000	0	4.2.99.8
ALAALA	D-AlanineD-Alanine ligase (ADP-forming)	2 ala-D[c] + atp[c] -> pi[c] + h[c] + adp[c] + alaala[c]	Moth_1140	Moth_1140		Amino Acid Metabolism	0	0	1000	0	6.3.2.4
ALAR	L-Alanine racemase	ala-L[c] <=> ala-D[c]	( ( Moth_2167 ) or ( Moth_2407 ) )	Moth_2167 Moth_2407		Amino Acid Metabolism	1	-1000	1000	0	5.1.1.1
AMID	4-Guanidinobutanamide amidohydrolase	4gudbd[c] + h2o[c] -> nh4[c] + 4gudbutn[c]	Moth_2086	Moth_2086		Amino Acid Metabolism	0	0	1000	0	3.5.1.4
AMPTASECG	membrane alanyl aminopeptidase	h2o[c] + cgly[c] <=> gly[c] + cys-L[c]	( ( Moth_2438 ) or ( Moth_1539 ) or ( Moth_1771 ) )	Moth_1539 Moth_1771 Moth_2438		Amino Acid Metabolism	1	-1000	1000	0	3.4.11.2
ANPRT	N-(5-Phospho-D-ribosyl)anthranilate:pyrophosphate	prpp[c] + anth[c] -> ppi[c] + pran[c]	Moth_1340	Moth_1340		Amino Acid Metabolism	0	0	1000	0	2.4.2.18
ANS	Chorismate pyruvate-lyase (amino-accepting)	gln-L[c] + chor[c] -> h[c] + pyr[c] + anth[c] + glu-L[c]	( Moth_1341 and Moth_1342 )	Moth_1341 Moth_1342		Amino Acid Metabolism	0	0	1000	0	4.1.3.27
ANS2	Chorismate pyruvate-lyase (amino-accepting)	nh4[c] + chor[c] -> h[c] + pyr[c] + anth[c] + h2o[c]	( Moth_1341 and Moth_1342 )	Moth_1341 Moth_1342		Amino Acid Metabolism	0	0	1000	0	4.1.3.27
ARGDC	arginine decarboxylase	h[c] + arg-L[c] -> agm[c] + co2[c]	Moth_2265	Moth_2265		Amino Acid Metabolism	0	0	1000	0	4.1.1.19
ARGN	L-Arginine amidinohydrolase	h2o[c] + arg-L[c] <=> urea[c] + orn[c]	Moth_1747	Moth_1747		Amino Acid Metabolism	1	-1000	1000	0	3.5.3.1
ARGSL	N-(L-Argininosuccinate) arginie-lyase	argsuc[c] <=> fum[c] + arg-L[c]	Moth_2284	Moth_2284		Amino Acid Metabolism	1	-1000	1000	0	4.3.2.1
ARGSS	L-Citrulline:L-aspartate ligase (AMP-forming)	asp-L[c] + atp[c] + citr-L[c] <=> ppi[c] + argsuc[c] + amp[c]	Moth_2285	Moth_2285		Amino Acid Metabolism	1	-1000	1000	0	6.3.4.5
ASAD	L-Aspartate-4-semialdehyde:NADP+ oxidoreductase (phosphorylating)	nadph[c] + 4pasp[c] -> pi[c] + aspsa[c] + nadp[c]	Moth_1066	Moth_1066		Amino Acid Metabolism	0	0	1000	0	1.2.1.11
ASNS1	L-aspartate:L-glutamine amido-ligase (AMP-forming)	gln-L[c] + asp-L[c] + h2o[c] + atp[c] -> asn-L[c] + ppi[c] + glu-L[c] + amp[c]	Moth_1299	Moth_1299		Amino Acid Metabolism	0	0	1000	0	6.3.5.4
ASPK	ATP:L-aspartate 4-phosphotransferase	asp-L[c] + h[c] + atp[c] <=> adp[c] + 4pasp[c]	( ( Moth_1067 ) or ( Moth_1304 ) )	Moth_1067 Moth_1304		Amino Acid Metabolism	1	-1000	1000	0	2.7.2.4
ASPT	L-Aspartate ammonia-lyase	asp-L[c] <=> nh4[c] + fum[c]	Moth_1273	Moth_1273		Amino Acid Metabolism	1	-1000	1000	0	3.5.1.38
ASPTA	aspartate transaminase	asp-L[c] + akg[c] <=> oaa[c] + glu-L[c]	( ( Moth_1188 ) or ( Moth_1490 ) or ( Moth_0017 ) )	Moth_1188 Moth_1490 Moth_0017		Amino Acid Metabolism	1	-1000	1000	0	2.6.1.1
ATPPRT	1-(5-Phospho-D-ribosyl)-ATP:pyrophosphate phosphoribosyl-transferase	prpp[c] + atp[c] -> ppi[c] + prbatp[c]	( Moth_2036 and Moth_2037 )	Moth_2036 Moth_2037		Amino Acid Metabolism	0	0	1000	0	2.4.2.17
CBPS	carbamoyl-phosphate synthase (glutamine-hydrolysing)	gln-L[c] + hco3[c] + h2o[c] + 2 atp[c] -> pi[c] + h[c] + 2 adp[c] + cbp[c] + glu-L[c]	( Moth_0881 and Moth_0882 )	Moth_0881 Moth_0882		Amino Acid Metabolism	0	0	1000	0	6.3.5.5
CHORM	Chorismate pyruvatemutase	chor[c] -> pphn[c]	( ( Moth_1335 and Moth_1955 ) or ( Moth_2412 and Moth_1955 ) or ( Moth_1343 ) )	Moth_1335 Moth_1343 Moth_1955 Moth_2412		Amino Acid Metabolism	0	0	1000	0	5.4.99.5
CHORS	5-O-(1-Carboxyvinyl)-3-phosphoshikimate phosphate-lyase	3psme[c] -> pi[c] + h[c] + chor[c]	Moth_1557	Moth_1557		Amino Acid Metabolism	0	0	1000	0	4.2.3.5
CYSDS	L-Cysteine L-homocysteine-lyase (deaminating)	h2o[c] + cys-L[c] -> nh4[c] + pyr[c] + h2s[c]	Moth_1990	Moth_1990		Amino Acid Metabolism	0	0	1000	0	4.4.1.1
CYSS	O3-Acetyl-L-serine acetate-lyase (adding hydrogen sulfide)	acser[c] + h2s[c] -> ac[c] + h[c] + cys-L[c]	( ( Moth_1706 ) or ( Moth_1971 ) or ( Moth_2000 ) )	Moth_1706 Moth_1971 Moth_2000		Amino Acid Metabolism	0	0	1000	0	2.5.1.47
CYSTL	Cystathionine L-homocysteine-lyase (deaminating)	cysth-L[c] + h2o[c] -> nh4[c] + pyr[c] + hcys-L[c]	Moth_1990	Moth_1990		Amino Acid Metabolism	0	0	1000	0	4.4.1.8
DAPAT	LL-2,6-diaminoheptanedioate:2-oxoglutarate aminotransferase	akg[c] + 26dap-LL[c] -> h[c] + h2o[c] + thdp[c] + glu-L[c]	Moth_0889	Moth_0889		Amino Acid Metabolism	0	0	1000	0	2.6.1.83
DAPDC	meso-2,6-Diaminoheptanedioate carboxy-lyase	h[c] + 26dap-M[c] -> lys-L[c] + co2[c]	Moth_1364	Moth_1364		Amino Acid Metabolism	0	0	1000	0	4.1.1.20
DAPE	LL-2,6-Diaminoheptanedioate 2-epimerase	26dap-LL[c] <=> 26dap-M[c]	Moth_0888	Moth_0888		Amino Acid Metabolism	1	-1000	1000	0	5.1.1.7
DDPA	Phosphoenolpyruvate:D-erythrose-4-phosphate	h2o[c] + pep[c] + e4p[c] -> pi[c] + h[c] + 2dda7p[c]	( ( Moth_1955 and Moth_1335 ) or ( Moth_1955 and Moth_2412 ) )	Moth_1335 Moth_1955 Moth_2412		Amino Acid Metabolism	0	0	1000	0	2.5.1.54
DHAD1	2,3-Dihydroxy-3-methylbutanoate hydro-lyase	23dhmb[c] -> 3mob[c] + h2o[c]	Moth_2259	Moth_2259		Amino Acid Metabolism	0	0	1000	0	4.2.1.9
DHAD2	(R)-2,3-Dihydroxy-3-methylpentanoate hydro-lyase	23dhmp[c] -> h2o[c] + 3mop[c]	Moth_2259	Moth_2259		Amino Acid Metabolism	0	0	1000	0	4.2.1.9
DHDPRy	2,3,4,5-Tetrahydrodipicolinate:NADP+ oxidoreductase	thdp[c] + nadp[c] <=> nadph[c] + h[c] + 23dhdp[c]	Moth_1063	Moth_1063		Amino Acid Metabolism	1	-1000	1000	0	1.3.1.26
DHDPS	L-Aspartate-4-semialdehyde hydro-lyase (adding pyruvate and	aspsa[c] + pyr[c] -> h[c] + 2 h2o[c] + 23dhdp[c]	( ( Moth_1068 ) or ( Moth_0631 ) )	Moth_1068 Moth_0631		Amino Acid Metabolism	0	0	1000	0	4.2.1.52
DHQD	3-Dehydroquinate hydro-lyase	3dhq[c] -> 3dhsk[c] + h2o[c]	Moth_1540	Moth_1540		Amino Acid Metabolism	0	0	1000	0	4.2.1.10
DHQS	2-Dehydro-3-deoxy-D-arabino-heptonate 7-phosphate phosphate-lyase	2dda7p[c] -> pi[c] + h[c] + 3dhq[c]	Moth_1555	Moth_1555		Amino Acid Metabolism	0	0	1000	0	4.2.3.4
EHGLAT	4-Hydroxy-L-glutamate:2-oxoglutarate aminotransferase	e4hglu[c] + akg[c] <=> 4h2oglt[c] + glu-L[c]	( ( Moth_1188 ) or ( Moth_1490 ) or ( Moth_0017 ) )	Moth_1188 Moth_1490 Moth_0017		Amino Acid Metabolism	1	-1000	1000	0	2.6.1.23
G5SADs	L-glutamate 5-semialdehyde dehydratase (spontaneous)	glu5sa[c] -> h[c] + h2o[c] + 1pyr5c[c]	NON-GENE ASSOCIATED	NON-GENE ASSOCIATED		Amino Acid Metabolism	0	0	1000	0	Undetermined
G5SD	L-Glutamate-5-semialdehyde:NADP+ 5-oxidoreductase (phosphorylationg)	glu5p[c] + nadph[c] -> pi[c] + glu5sa[c] + nadp[c]	Moth_0563	Moth_0563		Amino Acid Metabolism	0	0	1000	0	1.2.1.41
GCCa	glycine-cleavage complex	h[c] + gly[c] + lpro[c] -> alpro[c] + co2[c]	( Moth_1942 and Moth_1943 )	Moth_1942 Moth_1943		Amino Acid Metabolism	0	0	1000	0	1.4.4.2
GCCb	glycine cleavage complex	thf[c] + alpro[c] -> nh4[c] + mlthf[c] + dhlpro[c]	( Moth_1944 and Moth_1945 )	Moth_1944 Moth_1945		Amino Acid Metabolism	0	0	1000	0	2.1.2.10	GCCb
GCCc	glycine-cleavage complex	dhlpro[c] + nad[c] <=> h[c] + lpro[c] + nadh[c]	( ( Moth_1942 and Moth_1943 and Moth_1944 and Moth_1945 ) or ( Moth_1763 ) )	Moth_1763 Moth_1942 Moth_1943 Moth_1944 Moth_1945		Amino Acid Metabolism	1	-1000	1000	0	1.8.1.4
GHMT2r	glycine hydroxymethyltransferase, reversible	gly[c] + h2o[c] + mlthf[c] <=> thf[c] + ser-L[c]	Moth_2390	Moth_2390		Amino Acid Metabolism	1	-1000	1000	0	2.1.2.1
GLNS	L-Glutamate:ammonia ligase (ADP-forming)	nh4[c] + atp[c] + glu-L[c] -> pi[c] + gln-L[c] + h[c] + adp[c]	( ( Moth_1294 ) or ( Moth_1297 ) or ( Moth_1764 ) or ( Moth_2299 ) )	Moth_1294 Moth_1297 Moth_1764 Moth_2299		Amino Acid Metabolism	0	0	1000	0	6.3.1.2
GLU5K	ATP:L-glutamate 5-phosphotransferase	h[c] + atp[c] + glu-L[c] <=> glu5p[c] + adp[c]	Moth_0562	Moth_0562		Amino Acid Metabolism	1	-1000	1000	0	2.7.2.11
HCITS	2-Hydroxybutane-1,2,4-tricarboxylate 2-oxoglutarate-lyase	h2o[c] + akg[c] + accoa[c] -> hcit[c] + h[c] + coa[c]	Moth_1938	Moth_1938		Amino Acid Metabolism	0	0	1000	0	2.3.3.14
HCO3E	HCO3 equilibration reaction	hco3[c] + h[c] <=> h2o[c] + co2[c]	Moth_1227	Moth_1227		Amino Acid Metabolism	1	-1000	1000	0	4.2.1.1
HISTD	histidinol dehydrogenase	h2o[c] + histd[c] + 2 nad[c] -> 3 h[c] + his-L[c] + 2 nadh[c]	Moth_2035	Moth_2035		Amino Acid Metabolism	0	0	1000	0	1.1.1.23
HISTP	L-Histidinol-phosphate phosphohydrolase	hisp[c] + h2o[c] -> pi[c] + h[c] + histd[c]	Moth_0817	Moth_0817		Amino Acid Metabolism	0	0	1000	0	3.1.3.15
HSDy	L-Homoserine:NADP+ oxidoreductase	hom-L[c] + nadp[c] <=> nadph[c] + aspsa[c] + h[c]	Moth_1307	Moth_1307		Amino Acid Metabolism	1	-1000	1000	0	1.1.1.3
HSERTA	Acetyl-CoA:L-homoserine O-acetyltransferase	hom-L[c] + accoa[c] -> achms[c] + coa[c]	Moth_1308	Moth_1308		Amino Acid Metabolism	0	0	1000	0	2.3.1.31
HSK	ATP:L-homoserine O-phosphotransferase	hom-L[c] + atp[c] <=> phom[c] + adp[c]	Moth_1305	Moth_1305		Amino Acid Metabolism	1	-1000	1000	0	2.7.1.39
HSTPT	5-Amino-2-oxopentanoate:2-oxoglutarate aminotransferase	hisp[c] + akg[c] <=> glu-L[c] + imacp[c]	Moth_0515	Moth_0515		Amino Acid Metabolism	1	-1000	1000	0	2.6.1.9
IG3PS	Imidazole-glycerol-3-phosphate synthase	gln-L[c] + prlp[c] -> aicar[c] + h[c] + eig3p[c] + glu-L[c]	( Moth_2031 and Moth_2033 )	Moth_2031 Moth_2033		Amino Acid Metabolism	0	0	1000	0	Undetermined
IGPDH	D-erythro-1-(Imidazol-4-yl)glycerol 3-phosphate hydro-lyase	eig3p[c] -> h2o[c] + imacp[c]	Moth_2034	Moth_2034		Amino Acid Metabolism	0	0	1000	0	4.2.1.19
IGPS	1-(2-Carboxyphenylamino)-1-deoxy-D-ribulose-5-phosphate	2cpr5p[c] + h[c] -> 3ig3p[c] + h2o[c] + co2[c]	Moth_1339	Moth_1339		Amino Acid Metabolism	0	0	1000	0	4.1.1.48
ILETA	L-Isoleucine:2-oxoglutarate aminotransferase	akg[c] + ile-L[c] <=> 3mop[c] + glu-L[c]	Moth_2260	Moth_2260		Amino Acid Metabolism	1	-1000	1000	0	2.6.1.42
IPMD	3-Isopropylmalate:NAD+ oxidoreductase	3c2hmp[c] + nad[c] <=> h[c] + nadh[c] + 3c4mop[c]	Moth_2252	Moth_2252		Amino Acid Metabolism	1	-1000	1000	0	1.1.1.85
IPPMIa	3-Isopropylmalate hydro-lyase	3c2hmp[c] <=> h2o[c] + 2ippm[c]	( Moth_2253 and Moth_2254 )	Moth_2253 Moth_2254		Amino Acid Metabolism	1	-1000	1000	0	4.2.1.33
IPPMIb	2-Isopropylmalate hydro-lyase	3c3hmp[c] <=> h2o[c] + 2ippm[c]	( Moth_2253 and Moth_2254 )	Moth_2253 Moth_2254		Amino Acid Metabolism	1	-1000	1000	0	4.2.1.33
IPPS	3-Carboxy-3-hydroxy-4-methylpentanoate 3-methyl-2-oxobutanoate-lyase	3mob[c] + h2o[c] + accoa[c] -> h[c] + 3c3hmp[c] + coa[c]	Moth_2255	Moth_2255		Amino Acid Metabolism	0	0	1000	0	2.3.3.13
KARA1	2,3-Dihydroxy-3-methylbutanoate:NADP+ oxidoreductase (isomerizing)	nadph[c] + h[c] + alac-S[c] <=> 23dhmb[c] + nadp[c]	Moth_1350	Moth_1350		Amino Acid Metabolism	1	-1000	1000	0	1.1.1.86
KARA2	ketol-acid reductoisomerase (2-Acetolactate)	2ahbut[c] + h[c] + nadph[c] <=> 23dhmp[c] + nadp[c]	Moth_1350	Moth_1350		Amino Acid Metabolism	1	-1000	1000	0	1.1.1.86
LEUTA	L-Leucine:2-oxoglutarate aminotransferase	leu-L[c] + akg[c] <=> 4mop[c] + glu-L[c]	Moth_2260	Moth_2260		Amino Acid Metabolism	1	-1000	1000	0	2.6.1.6
LYSAM	L-Lysine 2,3-aminomutase	lys-L[c] <=> 36dahx[c]	Moth_0457	Moth_0457		Amino Acid Metabolism	1	-1000	1000	0	5.4.3.2
LYSDC	L-Lysine carboxy-lyase	lys-L[c] + h[c] -> 15dap[c] + co2[c]	Moth_2265	Moth_2265		Amino Acid Metabolism	0	0	1000	0	4.1.1.18
METACH	O-Acetyl-L-homoserine acetate-lyase (adding methanethiol)	h2s[c] + achms[c] -> ac[c] + h[c] + hcys-L[c]	Moth_1309	Moth_1309		Amino Acid Metabolism	0	0	1000	0	2.5.1.49
METAT	ATP:L-methione S-adenosyltransferase	h2o[c] + met-L[c] + atp[c] -> pi[c] + ppi[c] + amet[c]	Moth_0894	Moth_0894		Amino Acid Metabolism	0	0	1000	0	2.5.1.6
METB1r	O-Acetyl-L-homoserine succinate-lyase (adding cysteine)	achms[c] + cys-L[c] <=> ac[c] + h[c] + cysth-L[c]	Moth_1989	Moth_1989		Amino Acid Metabolism	1	-1000	1000	0	2.5.1.49
METS	5-Methyltetrahydrofolate:L-homocysteine S-methyltransferase	5mthf[c] + hcys-L[c] <=> thf[c] + met-L[c]	( ( Moth_1207 ) or ( Moth_1311 ) or ( Moth_1318 ) or ( Moth_2115 ) or ( Moth_0385 ) )	Moth_1207 Moth_1311 Moth_1318 Moth_2115 Moth_0385		Amino Acid Metabolism	1	-1000	1000	0	2.1.1.13
MTRI	5-Methylthio-5-deoxy-D-ribose-1-phosphate ketol-isomerase	5mdr1p[c] <=> 5mdru1p[c]	Moth_0703	Moth_0703		Amino Acid Metabolism	1	-1000	1000	0	5.3.1.23
OCBT	Carbamoyl-phosphate:L-ornithine carbamoyltransferase	cbp[c] + orn[c] <=> pi[c] + 2 h[c] + citr-L[c]	( ( Moth_1996 ) or ( Moth_2286 ) )	Moth_1996 Moth_2286		Amino Acid Metabolism	1	-1000	1000	0	2.1.3.3
OMCDC	2-Oxo-4-methyl-3-carboxypentanoate decarboxylation	h[c] + 3c4mop[c] -> co2[c] + 4mop[c]	NON-GENE ASSOCIATED	NON-GENE ASSOCIATED		Amino Acid Metabolism	0	0	1000	0	Undetermined
ORNDC	L-Ornithine carboxy-lyase	h[c] + orn[c] -> ptrc[c] + co2[c]	Moth_2265	Moth_2265		Amino Acid Metabolism	0	0	1000	0	4.1.1.17
ORNTAC	N2-Acetyl-L-ornithine:L-glutamate N-acetyltransferase	acorn[c] + glu-L[c] <=> acglu[c] + orn[c]	Moth_2289	Moth_2289		Amino Acid Metabolism	1	-1000	1000	0	2.3.1.35
P5CR	L-Proline:NAD+ 5-oxidoreductase	pro-L[c] + nad[c] <=> h[c] + nadh[c] + 1pyr5c[c]	Moth_0860	Moth_0860		Amino Acid Metabolism	1	-1000	1000	0	1.5.1.2
PGCDr	3-Phospho-D-glycerate:NAD+ 2-oxidoreductase	3pg[c] + nad[c] <=> h[c] + nadh[c] + 3php[c]	Moth_0020	Moth_0020		Amino Acid Metabolism	1	-1000	1000	0	1.1.1.95
PHETA1	L-Phenylalanine:2-oxoglutarate aminotransferase	phe-L[c] + akg[c] <=> phpyr[c] + glu-L[c]	Moth_0515	Moth_0515		Amino Acid Metabolism	1	-1000	1000	0	2.6.1.1
PPND	Prephenate:NAD+ oxidoreductase(decarboxylating)	pphn[c] + nad[c] -> 34hpp[c] + nadh[c] + co2[c]	Moth_1333	Moth_1333		Amino Acid Metabolism	0	0	1000	0	1.3.1.12
PPNDH	Prephenate hydro-lyase (decarboxylating)	h[c] + pphn[c] -> phpyr[c] + h2o[c] + co2[c]	Moth_1334	Moth_1334		Amino Acid Metabolism	0	0	1000	0	4.2.1.51
PRAI	N-(5-Phospho-beta-D-ribosyl)anthranilate ketol-isomerase	pran[c] <=> 2cpr5p[c]	Moth_1338	Moth_1338		Amino Acid Metabolism	1	-1000	1000	0	5.3.1.24
PRAMPC	1-(5-phospho-D-ribosyl)-AMP 1,6-hydrolase	h2o[c] + prbamp[c] <=> prfp[c]	Moth_2030	Moth_2030		Amino Acid Metabolism	1	-1000	1000	0	3.5.4.19
PRATPP	Phosphoribosyl-ATP pyrophosphohydrolase	h2o[c] + prbatp[c] -> ppi[c] + prbamp[c]	Moth_2030	Moth_2030		Amino Acid Metabolism	0	0	1000	0	3.6.1.31
PRMICI	N-(5'-Phospho-D-ribosylformimino)-5-amino-1-	prfp[c] <=> prlp[c]	Moth_2032	Moth_2032		Amino Acid Metabolism	1	-1000	1000	0	5.3.1.16
PSCVT	Phosphoenolpyruvate:3-phosphoshikimate	pep[c] + skm5p[c] <=> pi[c] + 3psme[c] + h[c]	Moth_1332	Moth_1332		Amino Acid Metabolism	1	-1000	1000	0	2.5.1.19
PSP_L	L-O-Phosphoserine phosphohydrolase	pser-L[c] + h2o[c] -> pi[c] + h[c] + ser-L[c]	Moth_1472	Moth_1472		Amino Acid Metabolism	0	0	1000	0	3.1.3.3
SDPDS	succinyl-diaminopimelate desuccinylase	h2o[c] + sl26da[c] -> 26dap-LL[c] + succ[c]	Moth_1646	Moth_1646		Amino Acid Metabolism	0	0	1000	0	3.5.1.18
SDPTA	succinyldiaminopimelate transaminase	akg[c] + sl26da[c] <=> glu-L[c] + sl2a6o[c]	Moth_2287	Moth_2287		Amino Acid Metabolism	1	-1000	1000	0	2.6.1.17
SERAT	serine O-acetyltransferase	ser-L[c] + accoa[c] -> acser[c] + coa[c]	Moth_2485	Moth_2485		Amino Acid Metabolism	0	0	1000	0	2.3.1.30
SERD_Lr	L-serine ammonia-lyase	ser-L[c] -> nh4[c] + pyr[c]	( Moth_1946 and Moth_1947 )	Moth_1946 Moth_1947		Amino Acid Metabolism	0	0	1000	0	4.3.1.17
SHK3D	Shikimate:NADP+ 5-oxidoreductase	nadp[c] + skm[c] <=> 3dhsk[c] + nadph[c] + h[c]	Moth_1558	Moth_1558		Amino Acid Metabolism	1	-1000	1000	0	1.1.1.25
SHKK	ATP:shikimate 3-phosphotransferase	atp[c] + skm[c] <=> adp[c] + skm5p[c]	Moth_1556	Moth_1556		Amino Acid Metabolism	1	-1000	1000	0	2.7.1.71
SHSL1	O-Succinyl-L-homoserine succinate-lyase (adding cysteine)	h[c] + cysth-L[c] + succ[c] <=> suchms[c] + cys-L[c]	Moth_1989	Moth_1989		Amino Acid Metabolism	1	-1000	1000	0	2.5.1.48
SHSL2r	O-Succinyl-L-homoserine succinate-lyase (adding cysteine)	h2s[c] + suchms[c] <=> h[c] + hcys-L[c] + succ[c]	Moth_1309	Moth_1309		Amino Acid Metabolism	1	-1000	1000	0	2.5.1.48
SHSL4r	O-Succinyl-L-homoserine succinate-lyase (adding cysteine)	h2o[c] + suchms[c] -> 2obut[c] + nh4[c] + h[c] + succ[c]	Moth_1989	Moth_1989		Amino Acid Metabolism	0	0	1000	0	2.5.1.48
SPMS	S-Adenosylmethioninamine:putrescine 3-aminopropyltransferase	ametam[c] + ptrc[c] <=> h[c] + 5mta[c] + spmd[c]	Moth_1816	Moth_1816		Amino Acid Metabolism	1	-1000	1000	0	2.5.1.16
THDPS	tetrahydropicolinate succinylase	h2o[c] + succoa[c] + thdp[c] -> coa[c] + sl2a6o[c]	Moth_2485	Moth_2485		Amino Acid Metabolism	0	0	1000	0	2.3.1.117
THRS	Threonine synthase	h2o[c] + phom[c] -> pi[c] + h[c] + thr-L[c]	( ( Moth_1306 ) or ( Moth_1998 ) )	Moth_1306 Moth_1998		Amino Acid Metabolism	0	0	1000	0	4.2.3.1
TRPS1	L-Serine hydro-lyase (adding indoleglycerol-phosphate)	3ig3p[c] + ser-L[c] <=> trp-L[c] + h2o[c] + g3p[c]	( Moth_1336 and Moth_1337 )	Moth_1336 Moth_1337		Amino Acid Metabolism	1	-1000	1000	0	4.2.1.20
TYRTA	L-Tyrosine:2-oxoglutarate aminotransferase	akg[c] + tyr-L[c] <=> 34hpp[c] + glu-L[c]	Moth_0515	Moth_0515		Amino Acid Metabolism	1	-1000	1000	0	2.6.1.1
VALTA	L-Valine:2-oxoglutarate aminotransferase	akg[c] + val-L[c] <=> 3mob[c] + glu-L[c]	Moth_2260	Moth_2260		Amino Acid Metabolism	1	-1000	1000	0	2.6.1.6
PSERT	phosphoserine transaminase	3php[c] + glu-L[c] -> akg[c] + pser-L[c]	Moth_0019	Moth_0019		Amino Acid Metabolism	0	0	1000	0	2.6.1.52
GLUTRS	glutamyl-tRNA synthetase	h[c] + atp[c] + glu-L[c] + trnaglu[c] -> glutrna[c] + ppi[c] + amp[c]	Moth_1132	Moth_1132		Amino Acid Metabolism	0	0	1000	0	6.1.1.17
THRPD	threonine-phosphate decarboxylase	h[c] + thrp[c] -> applp[c] + co2[c]	Moth_1104	Moth_1104		Amino Acid Metabolism	0	0	1000	0	4.1.1.81
PLPS	Pyridoxal-5-phosphate synthase	g3p[c] + gln-L[c] + r5p[c] -> glu-L[c] + h[c] + 3 h2o[c] + pi[c] + pydx5p[c]	Moth_0009	Moth_0009		Amino Acid Metabolism	1	0	1000	0	1.4.3.5
ALATA_L	L-alanine transaminase	akg[c] + ala-L[c] <=> glu-L[c] + pyr[c]	Moth_1490	Moth_1490		Amino Acid Metabolism	1	-1000	1000	0	2.6.1.2
GLUSy	L-Glutamate:NADP+ oxidoreductase (transaminating)	nadp[c] + 2 glu-L[c] <=> nadph[c] + gln-L[c] + h[c] + akg[c]	( Moth_1949 and Moth_1292 )	Moth_1292 Moth_1949		Amino Acid Metabolism	1	-1000	1000	0	1.4.1.13
AMID2	2-phenylacetamide amidohydrolase	pad[c] + h[c] + h2o[c] <=> nh4[c] + pac[c]	Moth_2086	Moth_2086		Amino Acid Metabolism	1	-1000	1000	0	3.5.1.4
AMID3	Indole-3-acetamide amidohydrolase	iad[c] + h2o[c] -> nh4[c] + ind3ac[c]	Moth_2086	Moth_2086		Amino Acid Metabolism	0	0	1000	0	3.5.1.4
AMID4	Acetamide amidohydrolase	h2o[c] + ad[c] -> ac[c] + nh4[c]	Moth_2086	Moth_2086		Amino Acid Metabolism	0	0	1000	0	3.5.1.4
AMID5	amidase	h2o[c] + aa[c] -> nh4[c] + acryl[c]	Moth_2086	Moth_2086		Amino Acid Metabolism	0	0	1000	0	3.5.1.4
TRPS2	L-Serine hydro-lyase (adding indoleglycerol-phosphate)	indole[c] + ser-L[c] <=> trp-L[c] + h2o[c]	( Moth_1336 and Moth_1337 )	Moth_1336 Moth_1337		Amino Acid Metabolism	1	-1000	1000	0	4.2.1.20
TRPS3	(1S,2R)-1-C-(indol-3-yl)glycerol 3-phosphate	3ig3p[c] <=> indole[c] + g3p[c]	( Moth_1336 and Moth_1337 )	Moth_1336 Moth_1337		Amino Acid Metabolism	1	-1000	1000	0	4.1.2.8
GALT	UTP:alpha-D-hexose-1-phosphate uridylyltransferase	gal1p[c] + utp[c] <=> udpgal[c] + ppi[c]	Moth_1935	Moth_1935		Carbohydrate Metabolism	1	-1000	1000	0	2.7.7.10
GALU	UTP:alpha-D-glucose-1-phosphate uridylyltransferase	g1p[c] + utp[c] <=> ppi[c] + udpg[c]	Moth_1369	Moth_1369		Carbohydrate Metabolism	1	-1000	1000	0	2.7.7.9
GLYCK	ATP:(R)-glycerate 3-phosphotransferase	glyc-R[c] + atp[c] <=> 3pg[c] + adp[c]	Moth_0404	Moth_0404		Carbohydrate Metabolism	1	-1000	1000	0	2.7.1.31
PPAKr	Propionate kinase	h[c] + atp[c] + ppa[c] <=> adp[c] + ppap[c]	Moth_0940	Moth_0940		Carbohydrate Metabolism	1	-1000	1000	0	2.7.2.1
TGBPA	D-Tagatose 1,6-bisphosphate triosephosphate lyase	tagdp-D[c] <=> dhap[c] + g3p[c]	Moth_0609	Moth_0609		Carbohydrate Metabolism	1	-1000	1000	0	4.1.2.40
UDPG4E	UDPglucose 4-epimerase	udpg[c] <=> udpgal[c]	( ( Moth_0673 ) or ( Moth_0751 ) )	Moth_0673 Moth_0751		Carbohydrate Metabolism	1	-1000	1000	0	5.1.3.2
ACS	Acetate:CoA ligase (AMP-forming)	ac[c] + h[c] + atp[c] + coa[c] -> ppi[c] + amp[c] + accoa[c]	Moth_2170	Moth_2170		Carbohydrate Metabolism	0	0	1000	0	6.2.1.1
FBA2	D-Fructose 1-phosphate D-glyceraldehyde-3-phosphate-lyase	f1p[c] <=> dhap[c] + glyald[c]	Moth_2404	Moth_2404		Carbohydrate Metabolism	1	-1000	1000	0	4.1.2.13
FBA3	Sedoheptulose 1,7-bisphosphate D-glyceraldehyde-3-phosphate-lyase	s17bp[c] <=> dhap[c] + e4p[c]	Moth_2404	Moth_2404		Carbohydrate Metabolism	1	-1000	1000	0	4.1.2.13
GLYCLTDx	Glycolate:NAD+ oxidoreductase	glyclt[c] + nad[c] <=> h[c] + glx[c] + nadh[c]	Moth_1954	Moth_1954		Carbohydrate Metabolism	1	-1000	1000	0	1.1.1.26
GLYCLTDy	Glycolate:NADP+ oxidoreductase	glyclt[c] + nadp[c] <=> nadph[c] + h[c] + glx[c]	Moth_1954	Moth_1954		Carbohydrate Metabolism	1	-1000	1000	0	1.1.1.79
GLYCTO10	(S)-2-Hydroxy-acid:oxygen 2-oxidoreductase	glyclt[c] + o2[c] -> glx[c] + h2o2[c]	( Moth_0037 and Moth_2307 )	Moth_0037 Moth_2307		Carbohydrate Metabolism	0	0	1000	0	1.1.3.15
GLYD	D-Glycerate:NADP+ 2-oxidoreductase	glyc-R[c] + nad[c] <=> h[c] + nadh[c] + hpyr[c]	Moth_1954	Moth_1954		Carbohydrate Metabolism	1	-1000	1000	0	1.1.1.26
HPYRRy	D-Glycerate:NADP+ 2-oxidoreductase	glyc-R[c] + nadp[c] <=> nadph[c] + h[c] + hpyr[c]	Moth_1954	Moth_1954		Carbohydrate Metabolism	1	-1000	1000	0	1.1.1.79
PFL	pyruvate formate lyase	coa[c] + pyr[c] -> accoa[c] + for[c]	Moth_0877	Moth_0877		Carbohydrate Metabolism	0	0	1000	0
AMALT1	Amylomaltase (maltotriose)	malttr[c] + malt[c] <=> maltttr[c] + glc-D[c]	Moth_1850	Moth_1850		Carbohydrate Metabolism Metabolism	1	-1000	1000	0	2.4.1.25
AMALT2	Amylomaltase (maltotetraose)	malt[c] + maltttr[c] <=> maltpt[c] + glc-D[c]	Moth_1850	Moth_1850		Carbohydrate Metabolism Metabolism	1	-1000	1000	0	2.4.1.25
AMALT3	Amylomaltase (maltopentaose)	malt[c] + maltpt[c] <=> malthx[c] + glc-D[c]	Moth_1850	Moth_1850		Carbohydrate Metabolism Metabolism	1	-1000	1000	0	2.4.1.25
AMALT4	Amylomaltase (maltohexaose)	malt[c] + malthx[c] <=> malthp[c] + glc-D[c]	Moth_1850	Moth_1850		Carbohydrate Metabolism Metabolism	1	-1000	1000	0	2.4.1.25
DDGLK	ATP:2-dehydro-3-deoxy-D-gluconate 6-phosphotransferase	2ddglcn[c] + atp[c] <=> adp[c] + 2ddg6p[c]	Moth_0419	Moth_0419		Carbohydrate Metabolism Metabolism	1	-1000	1000	0	2.7.1.45
GLYCDx	Glycerol dehydrogenase	glyc[c] + nad[c] <=> h[c] + nadh[c] + dha[c]	Moth_0464	Moth_0464		Carbohydrate Metabolism Metabolism	1	-1000	1000	0	1.1.1.6
MANAO	D-Mannonate:NAD+ 5-oxidoreductase	mana[c] + nad[c] <=> h[c] + nadh[c] + fruur[c]	Moth_0429	Moth_0429		Carbohydrate Metabolism Metabolism	1	-1000	1000	0	1.1.1.57
MNNH	D-mannonate hydro-lyase	mana[c] -> 2ddglcn[c] + h2o[c]	Moth_0430	Moth_0430		Carbohydrate Metabolism Metabolism	0	0	1000	0	4.2.1.8
PPM2	2-Deoxy-D-ribose 1-phosphate 1,5-phosphomutase	2dr1p[c] <=> 2dr5p[c]	Moth_1500	Moth_1500		Carbohydrate Metabolism Metabolism	1	-1000	1000	0	5.4.2.7
TARTD	(R,R)-Tartrate hydro-lyase	tartr-L[c] -> oaa[c] + h2o[c]	( Moth_2282 and Moth_2283 )	Moth_2282 Moth_2283		Carbohydrate Metabolism Metabolism	0	0	1000	0	4.2.1.32
TRE6PP	Trehalose-6-phosphate phosphohydrolase	tre6p[c] + h2o[c] -> pi[c] + h[c] + tre[c]	Moth_1368	Moth_1368		Carbohydrate Metabolism Metabolism	0	0	1000	0	3.1.3.12
TREPS	UDPglucose:D-glucose-6-phosphate 1-alpha-D-glucosyltransferase	udpg[c] + g6p[c] <=> tre6p[c] + udp[c]	Moth_1367	Moth_1367		Carbohydrate Metabolism Metabolism	1	-1000	1000	0	2.4.1.15
XYLI1	xylose isomerase	xyl-D[c] <=> xylu-D[c]	Moth_2026	Moth_2026		Carbohydrate Metabolism Metabolism	1	-1000	1000	0	5.3.1.5
XYLI2	xylose isomerase	glc-D[c] <=> fru[c]	Moth_2026	Moth_2026		Carbohydrate Metabolism Metabolism	1	-1000	1000	0	5.3.1.5
XYLK	xylulokinase	atp[c] + xylu-D[c] <=> xu5p-D[c] + adp[c]	Moth_2025	Moth_2025		Carbohydrate Metabolism Metabolism	1	-1000	1000	0	2.7.1.17
GLYCTO2	Glycolate oxidase	glyclt[c] + q8[c] <=> glx[c] + q8h2[c]	( Moth_0039 and Moth_0037 and Moth_0038 )	Moth_0037 Moth_0038 Moth_0039		Carbohydrate Metabolism Metabolism	1	-1000	1000	0	Undetermined
GLYCTO3	Glycolate oxidase	glyclt[c] + mqn8[c] -> glx[c] + mql8[c]	( Moth_0039 and Moth_0038 )	Moth_0038 Moth_0039		Carbohydrate Metabolism Metabolism	0	0	1000	0	Undetermined
GLYCTO4	Glycolate oxidase	2dmmq8[c] + glyclt[c] -> 2dmmql8[c] + glx[c]	( Moth_0039 and Moth_0038 )	Moth_0038 Moth_0039		Carbohydrate Metabolism Metabolism	0	0	1000	0	Undetermined
ACGAMT	UDP-N-acetylglucosamine:undecaprenylphosphate N-acetylglucosamine -1-phosphate transferase	uacgam[c] + udcpp[c] <=> ump[c] + unaga[c]	Moth_0218	Moth_0218		Cell Envelope Biosynthesis	1	-1000	1000	0	Undetermined
AGPAT120	1-tetradecanoyl-sn-glycerol 3-phosphate O-acyltransferase (n-C12:0)	ddcaACP[c] + 1ddecg3p[c] -> ACP[c] + pa120[c]	Moth_1330	Moth_1330		Cell Envelope Biosynthesis	0	0	1000	0	2.3.1.51
AGPAT140	1-tetradecanoyl-sn-glycerol 3-phosphate O-acyltransferase (n-C14:0)	myrsACP[c] + 1tdecg3p[c] -> ACP[c] + pa140[c]	Moth_1330	Moth_1330		Cell Envelope Biosynthesis	0	0	1000	0	2.3.1.51
AGPAT160	1-hexadecanoyl-sn-glycerol 3-phosphate O-acyltransferase (n-C16:0)	palmACP[c] + 1hdecg3p[c] -> pa160[c] + ACP[c]	Moth_1330	Moth_1330		Cell Envelope Biosynthesis	0	0	1000	0	2.3.1.51
AGPAT161	1-hexadec-7-enoyl-sn-glycerol 3-phosphate O-acyltransferase (n-C16:1)	1hdec9eg3p[c] + hdeACP[c] -> ACP[c] + pa161[c]	Moth_1330	Moth_1330		Cell Envelope Biosynthesis	0	0	1000	0	2.3.1.51
AGPAT180	1-octadecanoyl-sn-glycerol 3-phosphate O-acyltransferase (n-C18:0)	ocdcaACP[c] + 1odecg3p[c] -> pa180[c] + ACP[c]	Moth_1330	Moth_1330		Cell Envelope Biosynthesis	0	0	1000	0	2.3.1.51
AGPAT181	1-octadec-7-enoyl-sn-glycerol 3-phosphate O-acyltransferase (n-C18:1)	octeACP[c] + 1odec11eg3p[c] -> pa181[c] + ACP[c]	Moth_1330	Moth_1330		Cell Envelope Biosynthesis	0	0	1000	0	2.3.1.51
AMAA	N-Acetylmuramoyl-Ala amidohydrolase	h2o[c] + acmama[c] <=> acmam[c] + ala-L[c]	( ( Moth_0991 ) or ( Moth_1272 ) )	Moth_1272 Moth_0991		Cell Envelope Biosynthesis	1	-1000	1000	0	3.5.1.28
AGPATr_MT	1-acylglycerol-3-phosphate O-acyltransferase	1ag3p_MT[c] + 0.0127 tdcoa[c] + 0.3812 fa3coa[c] + 0.0230 fa4coa[c] + 0.2133 pmtcoa[c] + 0.3000 fa12coa[c] + 0.0191 hdcoa[c] + 0.0372 stcoa[c] + 0.0134 odecoa[c] <=> 12dag3p_MT[c] + coa[c]	Moth_1075	Moth_1075		Cell Envelope Biosynthesis	1	-1000	1000	0	2.3.1.51
CDGPT_MT	CDP-diacylglycerol sn-glycerol-3-phosphate-3-phosphatidyltransferase	cdpdag_MT[c] + glyc3p[c] -> cmp[c] + h[c] + pglyp_MT[c]	Moth_1075	Moth_1075		Cell Envelope Biosynthesis	0	0	1000	0	2.7.8.5
CDPDSP_MT	CDP-diacylglycerol serine O-phosphatidyltransferase	cdpdag_MT[c] + ser-L[c] -> cmp[c] + h[c] + ps_MT[c]	Moth_1075	Moth_1075		Cell Envelope Biosynthesis	0	0	1000	0	2.7.8.8
CLPNS2_MT	cardiolipin synthase	2 pgly_MT[c] -> cdlp_MT[c] + glyc[c]	Moth_1075	Moth_1075		Cell Envelope Biosynthesis	0	0	1000	0	2.7.8.-
DAGK120	diacylglycerol kinase (n-C12:0)	12dgr120[c] + atp[c] <=> adp[c] + pa120[c]	Moth_0596	Moth_0596		Cell Envelope Biosynthesis	1	-1000	1000	0	2.7.1.107
DAGK140	diacylglycerol kinase (n-C14:0)	12dgr140[c] + atp[c] <=> adp[c] + pa140[c]	Moth_0596	Moth_0596		Cell Envelope Biosynthesis	1	-1000	1000	0	2.7.1.107
DAGK160	diacylglycerol kinase (n-C16:0)	12dgr160[c] + atp[c] <=> pa160[c] + adp[c]	Moth_0596	Moth_0596		Cell Envelope Biosynthesis	1	-1000	1000	0	2.7.1.107
DAGK161	diacylglycerol kinase (n-C16:1)	12dgr161[c] + atp[c] <=> adp[c] + pa161[c]	Moth_0596	Moth_0596		Cell Envelope Biosynthesis	1	-1000	1000	0	2.7.1.107
DAGK180	diacylglycerol kinase (n-C18:0)	12dgr180[c] + atp[c] <=> pa180[c] + adp[c]	Moth_0596	Moth_0596		Cell Envelope Biosynthesis	1	-1000	1000	0	2.7.1.107
DAGK181	diacylglycerol kinase (n-C18:1)	12dgr181[c] + atp[c] <=> pa181[c] + adp[c]	Moth_0596	Moth_0596		Cell Envelope Biosynthesis	1	-1000	1000	0	2.7.1.107
G1PACT	Acetyl-CoA:D-glucosamine-1-phosphate N-acetyltransferase	gam1p[c] + accoa[c] -> h[c] + acgam1p[c] + coa[c]	Moth_0075	Moth_0075		Cell Envelope Biosynthesis	0	0	1000	0	2.3.1.157
G3PCT	glycerol-3-phosphate cytidylyltransferase	ctp[c] + glyc3p[c] + h[c] -> cdpglyc[c] + ppi[c]	Moth_1039	Moth_1039		Cell Envelope Biosynthesis	0	0	1000	0	2.7.7.39
G3POA_MT	glycerol-3-phosphate O-acyltransferase	glyc3p[c] + 0.0127 tdcoa[c] + 0.3812 fa3coa[c] + 0.0230 fa4coa[c] + 0.2133 pmtcoa[c] + 0.3000 fa12coa[c] + 0.0191 hdcoa[c] + 0.0372 stcoa[c] + 0.0134 odecoa[c] -> 1ag3p_MT[c] + coa[c]	( Moth_1321 and Moth_0944 )	Moth_1321 Moth_0944		Cell Envelope Biosynthesis	0	0	1000	0	Undetermined
GF6PTA	glutamine-fructose-6-phosphate transaminase	gln-L[c] + f6p[c] <=> gam6p[c] + glu-L[c]	Moth_2245	Moth_2245		Cell Envelope Biosynthesis	1	-1000	1000	0	2.6.1.16
GLCP	glycogen phosphorylase	glycogen[c] + pi[c] -> g1p[c]	Moth_1852	Moth_1852		Cell Envelope Biosynthesis	0	0	1000	0	2.4.1.1
GLCS1	glycogen synthase (ADPGlc)	adpglc[c] -> adp[c] + glycogen[c] + h[c]	Moth_1936	Moth_1936		Cell Envelope Biosynthesis	0	0	1000	0	2.4.1.21
GLGC	glucose-1-phosphate adenylyltransferase	atp[c] + g1p[c] + h[c] -> adpglc[c] + ppi[c]	Moth_0757	Moth_0757		Cell Envelope Biosynthesis	0	0	1000	0	2.7.7.27
GLUR	L-Glutamate racemase	glu-L[c] <=> glu-D[c]	Moth_0518	Moth_0518		Cell Envelope Biosynthesis	1	-1000	1000	0	5.1.1.3
HOPNTAL	4-hydroxy-2-oxopentanoate pyruvate-lyase	pyr[c] + acald[c] <=> 4h2opntn[c]	Moth_1775	Moth_1775		Cell Envelope Biosynthesis	1	-1000	1000	0	4.1.3.39
LIPO1S24_MT	lipoteichoic acid synthesis (n24 linked glucose substituted)	24 cdpglyc[c] + d12dg_MT[c] + 24 udpg[c] -> 24 cmp[c] + 48 h[c] + lipo1_24_MT[c] + 24 udp[c]	( Moth_0215 and Moth_0218 )	Moth_0215 Moth_0218		Cell Envelope Biosynthesis	0	0	1000	0	Undetermined
LIPO2S24_MT	lipoteichoic acid synthesis (n24 linked N-acetylglucosamine substituted)	24 cdpglyc[c] + d12dg_MT[c] + 24 uacgam[c] -> 24 cmp[c] + 48 h[c] + lipo2_24_MT[c] + 24 udp[c]	( Moth_0215 and Moth_0218 )	Moth_0215 Moth_0218		Cell Envelope Biosynthesis	0	0	1000	0	Undetermined
LIPO3S24_MT	lipoteichoic acid synthesis (n24 unlinked D-alanine substituted)	24 ala-D[c] + 24 atp[c] + 24 cdpglyc[c] + d12dg_MT[c] + 24 h2o[c] -> 24 amp[c] + 24 cmp[c] + 48 h[c] + lipo3_24_MT[c] + 24 ppi[c]	( Moth_0215 and Moth_0218 )	Moth_0215 Moth_0218		Cell Envelope Biosynthesis	0	0	1000	0	Undetermined
LIPO4S24_MT	lipoteichoic acid synthesis (n24 linked unsubstituted)	24 cdpglyc[c] + d12dg_MT[c] -> cmp[c] + h[c] + lipo4_24_MT[c]	( Moth_0215 and Moth_0218 )	Moth_0215 Moth_0218		Cell Envelope Biosynthesis	0	0	1000	0	Undetermined
LYSLG_MT	lysylphosphatidylglycerol synthesis	atp[c] + lys-L[c] + pgly_MT[c] -> amp[c] + h[c] + lysylpgly_MT[c] + ppi[c]	( Moth_0215 and Moth_0218 )	Moth_0215 Moth_0218		Cell Envelope Biosynthesis	0	0	1000	0	Undetermined
NACCYT	CTP:N-acylneuraminate cytidylyltransferase	ctp[c] + acnam[c] -> cmpacna[c] + ppi[c]	Moth_0758	Moth_0758		Cell Envelope Biosynthesis	0	0	1000	0	2.7.7.43
PAP_MT	phosphatidic acid phosphatase	12dag3p_MT[c] + h2o[c] -> 12dgr_MT[c] + pi[c]	Moth_1710	Moth_1710		Cell Envelope Biosynthesis	0	0	1000	0	3.1.3.4
PAPPT3	phospho-N-acetylmuramoyl-pentapeptide-transferase (meso-2,6-diaminopimelate)	ugmda[c] + udcpp[c] <=> ump[c] + uagmda[c]	Moth_0840	Moth_0840		Cell Envelope Biosynthesis	1	-1000	1000	0	2.7.8.13
PGAMT	D-Glucosamine 1-phosphate 1,6-phosphomutase	gam1p[c] <=> gam6p[c]	Moth_2246	Moth_2246		Cell Envelope Biosynthesis	1	-1000	1000	0	5.4.2.10
PGPPH_MT	Phosphatidylglycerophosphate_phosphohydrolase	h2o[c] + pglyp_MT[c] -> pgly_MT[c] + pi[c]	Moth_1710	Moth_1710		Cell Envelope Biosynthesis	0	0	1000	0	3.1.3.27
PHCYT_MT	phosphatidate_cytidylyltransferase	12dag3p_MT[c] + ctp[c] + h[c] -> cdpdag_MT[c] + ppi[c]	Moth_1710	Moth_1710		Cell Envelope Biosynthesis	0	0	1000	0	2.7.7.41
PPTGS_MT	Peptidoglycan_subunit_synthesis	uaagmda[c] -> h[c] + peptido_MT[c] + udcpdp[c]	Moth_1710	Moth_1710		Cell Envelope Biosynthesis	0	0	1000	0	Undetermined
PSDC_MT	phosphatidylserine_decarboxylase	ps_MT[c] -> co2[c] + psetha_MT[c]	Moth_1710	Moth_1710		Cell Envelope Biosynthesis	0	0	1000	0	4.1.1.65
TDPDRE	dTDP-4-dehydro-6-deoxy-D-glucose 3,5-epimerase	dtdp4d6dg[c] <=> dtdp4d6dm[c]	Moth_0165	Moth_0165		Cell Envelope Biosynthesis	1	-1000	1000	0	5.1.3.13
TDPDRR	dTDP-6-deoxy-L-mannose:NADP+ 4-oxidoreductase	dtdprmn[c] + nadp[c] <=> nadph[c] + h[c] + dtdp4d6dm[c]	Moth_0164	Moth_0164		Cell Envelope Biosynthesis	1	-1000	1000	0	1.1.1.133
TDPGDH	dTDPglucose 4,6-hydro-lyase	dtdpglu[c] -> dtdp4d6dg[c] + h2o[c]	Moth_0163	Moth_0163		Cell Envelope Biosynthesis	0	0	1000	0	4.2.1.46
TECA1S45	glycerol teichoic acid synthesis (n45 unlinked unsubstituted)	45 cdpglyc[c] + uacgam[c] + uacmam[c] -> cmp[c] + gtca1_45_MT[c] + h[c] + udp[c] + ump[c]	Moth_1710	Moth_1710		Cell Envelope Biosynthesis	0	0	1000	0	Undetermined
TECA2S45	glycerol teichoic acid synthesis (n45 unlinked D-ala substituted)	45 ala-D[c] + 45 atp[c] + 45 cdpglyc[c] + 45 h2o[c] + uacgam[c] + uacmam[c] -> amp[c] + cmp[c] + gtca2_45_MT[c] + h[c] + ppi[c] + udp[c] + ump[c]	Moth_1710	Moth_1710		Cell Envelope Biosynthesis	0	0	1000	0	Undetermined
TECA3S45	glycerol teichoic acid synthesis (n45 unlinked glucose substituted)	45 cdpglyc[c] + h2o[c] + uacgam[c] + uacmam[c] + 45 udpg[c] -> cmp[c] + gtca3_45_MT[c] + h[c] + udp[c] + ump[c]	Moth_1710	Moth_1710		Cell Envelope Biosynthesis	0	0	1000	0	Undetermined
TECA4S_MT	minor teichoic acid synthesis (n30 acetylgalactosamine glucose phosphate)	30 h2o[c] + 30 udpacgal[c] + 30 udpg[c] -> 60 h[c] + tcam_MT[c] + 30 udp[c] + 30 ump[c]	Moth_1710	Moth_1710		Cell Envelope Biosynthesis	0	0	1000	0	Undetermined
TEICH45	teichoic acid synthesis (n45 unlinked GalNAc-GlcA-repeated)	45 udpacgal[c] + 45 udpglcur[c] <=> 45 h[c] + teich_45_MT[c] + 45 udp[c] + 45 ump[c]	Moth_1710	Moth_1710		Cell Envelope Biosynthesis	1	-1000	1000	0	Undetermined
UAAGDS	UDP-N-acetylmuramoyl-L-alanyl-D-glutamyl-meso-2,6-diaminopimelate synthetase	uamag[c] + 26dap-M[c] + atp[c] -> pi[c] + ugmd[c] + h[c] + adp[c]	Moth_0838	Moth_0838		Cell Envelope Biosynthesis	0	0	1000	0	6.3.2.13
UAG2E	UDP-N-acetylglucosamine 2-epimerase	uacgam[c] <=> uacmam[c]	Moth_2387	Moth_2387		Cell Envelope Biosynthesis	1	-1000	1000	0	5.1.3.14
UAG4E	UDP-N-acetyl-D-glucosamine 4-epimerase	uacgam[c] <=> udpacgal[c]	( ( Moth_0673 ) or ( Moth_0751 ) )	Moth_0673 Moth_0751		Cell Envelope Biosynthesis	1	-1000	1000	0	5.1.3.7
UAGCVT	Phosphoenolpyruvate:UDP-N-acetyl-D-glucosamine	uacgam[c] + pep[c] <=> uaccg[c] + pi[c] + h[c]	( ( Moth_2375 ) or ( Moth_0846 ) )	Moth_2375 Moth_0846		Cell Envelope Biosynthesis	1	-1000	1000	0	2.5.1.7
UAGDP	UTP:N-acetyl-alpha-D-glucosamine-1-phosphate uridylyltransferase	acgam1p[c] + utp[c] <=> uacgam[c] + ppi[c]	Moth_0075	Moth_0075		Cell Envelope Biosynthesis	1	-1000	1000	0	2.7.7.23
UAGPT3	UDP-N-acetylglucosamine-N-acetylmuramyl-(pentapeptide)pyrophosphoryl-undecaprenol N-acetylglucosamine transferase	uacgam[c] + uagmda[c] <=> udp[c] + uaagmda[c]	Moth_0843	Moth_0843		Cell Envelope Biosynthesis	1	-1000	1000	0	2.4.1.227
UAMAGS	UDP-N-acetylmuramoyl-L-alanine:D-glutamate ligase(ADP-forming)	uama[c] + glu-D[c] + atp[c] -> pi[c] + h[c] + uamag[c] + adp[c]	Moth_0841	Moth_0841		Cell Envelope Biosynthesis	0	0	1000	0	6.3.2.9
UAMAS	UDP-N-acetylmuramate:L-alanine ligase (ADP-forming)	ala-L[c] + atp[c] + uamr[c] -> pi[c] + uama[c] + h[c] + adp[c]	Moth_0844	Moth_0844		Cell Envelope Biosynthesis	0	0	1000	0	6.3.2.8
UAPGR	UDP-N-acetylmuramate:NADP+ oxidoreductase	uaccg[c] + nadph[c] + h[c] -> nadp[c] + uamr[c]	Moth_0845	Moth_0845		Cell Envelope Biosynthesis	0	0	1000	0	1.1.1.158
UDCPDP	Undecaprenyl-diphosphate phosphohydrolase	udcpdp[c] + h2o[c] -> pi[c] + h[c] + udcpp[c]	Moth_0571	Moth_0571		Cell Envelope Biosynthesis	0	0	1000	0	3.6.1.27
UDCPDPS	Undecaprenyl diphosphate synthase	frdp[c] + 8 ipdp[c] -> 8 ppi[c] + udcpdp[c]	Moth_1038	Moth_1038		Cell Envelope Biosynthesis	0	0	1000	0	2.5.1.31
UGMDDS	UDP-N-acetylmuramoyl-L-alanyl-D-glutamyl-meso-2,6-	ugmd[c] + alaala[c] + atp[c] -> ugmda[c] + pi[c] + h[c] + adp[c]	Moth_0839	Moth_0839		Cell Envelope Biosynthesis	0	0	1000	0	6.3.2.10
UGT_MT	UDP-glucosyltransferase diglucosyldiacylglycerol synthesis	12dgr_MT[c] + 2 udpg[c] -> d12dg_MT[c] + 2 h[c] + 2 udp[c]	( Moth_0841 and Moth_0843 and Moth_0844 and Moth_0846)	Moth_0841 Moth_0843 Moth_0844 Moth_0846		Cell Envelope Biosynthesis	0	0	1000	0	Undetermined
UGT1_MT	UDP-glucosyltransferase monoglucosyldiacylglycerol synthesis	12dgr_MT[c] + udpg[c] -> h[c] + m12dg_MT[c] + udp[c]	( Moth_0841 and Moth_0843 and Moth_0844 and Moth_0846)	Moth_0841 Moth_0843 Moth_0844 Moth_0846		Cell Envelope Biosynthesis	0	0	1000	0	Undetermined
UGT2_MT	UDP-glucosyltransferase triglucosyldiacylglycerol synthesis	12dgr_MT[c] + 3 udpg[c] -> 3 h[c] + t12dg_MT[c] + 3 udp[c]	( Moth_0841 and Moth_0843 and Moth_0844 and Moth_0846)	Moth_0841 Moth_0843 Moth_0844 Moth_0846		Cell Envelope Biosynthesis	0	0	1000	0	Undetermined
AGPAT141	1-tetradec-7-enoyl-sn-glycerol 3-phosphate O-acyltransferase (n-C14:1)	1tdec7eg3p[c] + tdeACP[c] -> pa141[c] + ACP[c]	Moth_1330	Moth_1330		Cell Envelope Biosynthesis	0	0	1000	0	2.3.1.51
DAGK141	diacylglycerol kinase (n-C14:1)	atp[c] + 12dgr141[c] <=> pa141[c] + adp[c]	Moth_0596	Moth_0596		Cell Envelope Biosynthesis	1	-1000	1000	0	2.7.1.107
CITL	Citrate lyase	cit[c] -> ac[c] + oaa[c]	Moth_0400	Moth_0400		Citrate Cycle (TCA)	0	0	1000	0	4.1.3.6
CS	Citrate (Si) synthase	oaa[c] + h2o[c] + accoa[c] -> h[c] + cit[c] + coa[c]	Moth_1122	Moth_1122		Citrate Cycle (TCA)	0	0	1000	0	4.1.3.7
ACONTa	aconitase (half-reaction A, Citrate hydro-lyase)	cit[c] <=> acon-C[c] + h2o[c]	Moth_1882	Moth_1882		Citrate Cycle (TCA)	1	-1000	1000	0	4.2.1.3
ACONTb	aconitase (half-reaction B, Isocitrate hydro-lyase)	acon-C[c] + h2o[c] <=> icit[c]	Moth_1882	Moth_1882		Citrate Cycle (TCA)	1	-1000	1000	0	4.2.1.3
ICDHx	isocitrate dehydrogenase (NAD)	icit[c] + nad[c] <=> akg[c] + co2[c] + nadh[c]	Moth_0993	Moth_0993		Citrate Cycle (TCA)	1	-1000	1000	0	1.1.1.41
OOR	2-oxoglutarate synthase (rev)	2 fdxox[c] + akg[c] + coa[c] <=> 2 fdxrd[c] + 2 h[c] + co2[c] + succoa[c]	( ( Moth_1983 and Moth_1984 and Moth_1985 and Moth_1986 ) or ( Moth_0033 and Moth_0034 and Moth_0035 and Moth_0036 ) or ( Moth_0376 and Moth_0377 and Moth_0378 and Moth_0379 ) )	Moth_1983 Moth_1984 Moth_1985 Moth_1986 Moth_0033 Moth_0034 Moth_0035 Moth_0036 Moth_0376 Moth_0377 Moth_0378 Moth_0379		Citrate Cycle (TCA)	1	-1000	1000	0	1.2.7.3
SUCOAS	Succinyl-CoA synthetase	succ[c] + atp[c] + coa[c] <=> pi[c] + adp[c] + succoa[c]	( Moth_0397 and Moth_0399 )	Moth_0397 Moth_0399		Citrate Cycle (TCA)	1	-1000	1000	0	6.2.1.5
FUM	fumarase	fum[c] + h2o[c] <=> mal-L[c]	( Moth_2282 and Moth_2283 )	Moth_2282 Moth_2283		Citrate Cycle (TCA)	1	-1000	1000	0	4.2.1.2
MDH	Malate dehydrogenase	mal-L[c] + nad[c] <=> h[c] + nadh[c] + oaa[c]	Moth_1826	Moth_1826		Citrate Cycle (TCA)	1	-1000	1000	0	1.1.1.37
ME2	malic enzyme (NADP)	mal-L[c] + nadp[c] -> nadph[c] + pyr[c] + co2[c]	Moth_0401	Moth_0401		Citrate Cycle (TCA)	0	0	1000	0	1.1.1.38
ME1	malic enzyme (NAD)	mal-L[c] + nad[c] -> nadh[c] + pyr[c] + co2[c]	Moth_0401	Moth_0401		Citrate Cycle (TCA)	0	0	1000	0	1.1.1.38
NNDMBRT3	nicotinate-nucleotide-dimethylbenzimidazole phosphoribosyltransferase	ribflv[c] -> dmbzid[c]	( ( Moth_1101 ) or ( Moth_1721 ) )	Moth_1101 Moth_1721		Cofactor and Prostehtic Group Biosynthesis	0	0	1000	0	2.4.2.21
PMDPHT	pyrimidine phosphatase	5aprbu[c] + h2o[c] -> 4r5au[c] + pi[c]	Moth_1353	Moth_1353		Cofactor and Prostehtic Group Biosynthesis	0	0	1000	0	3.1.3.-
AHMMPS	4-amino-5-hydroxymethyl-2-methylpyrimidine synthetase	air[c] + amet[c] + h2o[c] <=> 4ampm[c] + 5doxa[c] + met-L[c] + for[c] + co[c]	( ( Moth_1401 ) or ( Moth_1722 and Moth_1723 ) )	Moth_1401 Moth_1722 Moth_1723		Cofactor and Prosthetic Group Biosynthesis	1	-1000	1000	0	Undetermined
AKP1	alkalinephosphatase (Dihydroneopterin)	ahdt[c] + 3 h2o[c] -> dhnpt[c] + 2 h[c] + 3 pi[c]	NON-GENE ASSOCIATED	NON-GENE ASSOCIATED		Cofactor and Prosthetic Group Biosynthesis	0	0	1000	0	3.1.3.1
APRAUR	5-amino-6-(5-phosphoribitylamino)uracil:NADP+ 1'-oxidoreductase	5aprbu[c] + nadp[c] <=> nadph[c] + h[c] + 5apru[c]	Moth_0915	Moth_0915		Cofactor and Prosthetic Group Biosynthesis	1	-1000	1000	0	1.1.1.193
ASP1DC	L-Aspartate 1-carboxy-lyase	asp-L[c] + h[c] -> ala-B[c] + co2[c]	Moth_0142	Moth_0142		Cofactor and Prosthetic Group Biosynthesis	0	0	1000	0	4.1.1.11
BTS	Biotin synthase	dtbt[c] + 2 amet[c] + s[c] -> btn[c] + 2 met-L[c] + 2 5doxa[c]	( ( Moth_0445 ) or ( Moth_1735 ) )	Moth_0445 Moth_1735		Cofactor and Prosthetic Group Biosynthesis	0	0	1000	0	2.8.1.6
BACCL	biotin-[acetyl-CoA-carboxylase] ligase	atp[c] + btn[c] + h[c] -> btamp[c] + ppi[c]	( ( Moth_0143 ) or ( Moth_0343 ) )	Moth_0143 Moth_0343		Cofactor and Prosthetic Group Biosynthesis	0	0	1000	0	6.2.1.11
CDPMEK	ATP: 4-(Cytidine 5'-diphospho)-2-C-methyl-D-erythritol	4c2me[c] + atp[c] <=> 2p4c2me[c] + adp[c]	Moth_0072	Moth_0072		Cofactor and Prosthetic Group Biosynthesis	1	-1000	1000	0	2.7.1.148
DB4PS	3,4-Dihydroxy-2-butanone 4-phosphate synthase	ru5p-D[c] -> h[c] + db4p[c] + for[c]	Moth_0917	Moth_0917		Cofactor and Prosthetic Group Biosynthesis	0	0	1000	0	Undetermined
DHFR	5,6,7,8-Tetrahydrofolate:NADP+ oxidoreductase	thf[c] + nadp[c] <=> nadph[c] + h[c] + dhf[c]	Moth_0110	Moth_0110		Cofactor and Prosthetic Group Biosynthesis	1	-1000	1000	0	1.5.1.3
DHFS	7,8-dihydropteroate:L-glutamate ligase (ADP-forming)	dhpt[c] + atp[c] + glu-L[c] -> pi[c] + h[c] + dhf[c] + adp[c]	Moth_0533	Moth_0533		Cofactor and Prosthetic Group Biosynthesis	0	0	1000	0	6.3.2.12
DHNPA3	dihydroneopterin aldolase	dhnpt[c] -> 2ahhmp[c] + gcald[c]	Moth_0407	Moth_0407		Cofactor and Prosthetic Group Biosynthesis	0	0	1000	0	4.1.2.25
DHPPDA2	2,5-Diamino-6-hydroxy-4-(5-phosphoribosylamino)-pyrimidine	h[c] + h2o[c] + 25drapp[c] -> nh4[c] + 5apru[c]	Moth_0915	Moth_0915		Cofactor and Prosthetic Group Biosynthesis	0	0	1000	0	3.5.4.26
DHPS	dihydropteroate synthase	2ahhmd[c] + 4abz[c] -> dhpt[c] + ppi[c]	Moth_0110	Moth_0110		Cofactor and Prosthetic Group Biosynthesis	0	0	1000	0	2.5.1.15
HPPK	2-amino-4-hydroxy-6-hydroxymethyldihydropteridine diphosphokinase	2ahhmp[c] + atp[c] -> 2ahhmd[c] + amp[c] + h[c]	Moth_0139	Moth_0139		Cofactor and Prosthetic Group Biosynthesis	0	0	1000	0	2.7.6.3
DMPPS	1-hydroxy-2-methyl-2-(E)-butenyl 4-diphosphate reductase (dmpp)	h[c] + nadh[c] + h2mb4p[c] -> h2o[c] + dmpp[c] + nad[c]	Moth_1329	Moth_1329		Cofactor and Prosthetic Group Biosynthesis	0	0	1000	0	Undetermined
DPCOAK	ATP:dephospho-CoA 3'-phosphotransferase	dpcoa[c] + atp[c] -> adp[c] + coa[c]	Moth_1838	Moth_1838		Cofactor and Prosthetic Group Biosynthesis	0	0	1000	0	2.7.1.24
DPR	(R)-Pantoate:NADP+ 2-oxidoreductase	pant-R[c] + nadp[c] <=> nadph[c] + h[c] + 2dhp[c]	Moth_1350	Moth_1350		Cofactor and Prosthetic Group Biosynthesis	1	-1000	1000	0	1.1.1.169
DXPRI	1-Deoxy-D-xylulose-5-phosphate isomeroreductase	2me4p[c] + nadp[c] <=> nadph[c] + dxyl5p[c] + h[c]	Moth_1041	Moth_1041		Cofactor and Prosthetic Group Biosynthesis	1	-1000	1000	0	1.1.1.267
DXPS	1-Deoxy-D-xylulose-5-phosphate pyruvate-lyase (carboxylating)	h[c] + pyr[c] + g3p[c] -> dxyl5p[c] + co2[c]	Moth_1511	Moth_1511		Cofactor and Prosthetic Group Biosynthesis	0	0	1000	0	2.2.1.7
FMNAT	ATP:FMN adenylyltransferase	fmn[c] + atp[c] -> ppi[c] + fad[c]	Moth_1054	Moth_1054		Cofactor and Prosthetic Group Biosynthesis	0	0	1000	0	2.7.7.2
FOLR2	Dihydrofolate:NADP+ oxidoreductase	dhf[c] + nadp[c] <=> nadph[c] + fol[c]	Moth_0110	Moth_0110		Cofactor and Prosthetic Group Biosynthesis	1	-1000	1000	0	1.5.1.3
FTHFCL	5-Formyltetrahydrofolate cyclo-ligase (ADP-forming)	5fthf[c] + atp[c] -> pi[c] + adp[c] + methf[c]	Moth_2140	Moth_2140		Cofactor and Prosthetic Group Biosynthesis	0	0	1000	0	6.3.3.2
GTPCI	GTP cyclohydrolase I	h2o[c] + gtp[c] -> ahdt[c] + h[c] + for[c]	Moth_0408	Moth_0408		Cofactor and Prosthetic Group Biosynthesis	0	0	1000	0	3.5.4.16
GTPCII	GTP cyclohydrolase II	3 h2o[c] + gtp[c] -> h[c] + ppi[c] + for[c] + 25drapp[c]	Moth_0917	Moth_0917		Cofactor and Prosthetic Group Biosynthesis	0	0	1000	0	3.5.4.25
HBZOPT	Hydroxybenzoate octaprenyltransferase	octdp[c] + 4hbz[c] -> ppi[c] + 3ophb[c]	Moth_0096	Moth_0096		Cofactor and Prosthetic Group Biosynthesis	0	0	1000	0	2.5.1.139
HETZK	hydroxyethylthiazole kinase	4mhetz[c] + atp[c] <=> 4mpetz[c] + adp[c]	Moth_2017	Moth_2017		Cofactor and Prosthetic Group Biosynthesis	1	-1000	1000	0	2.7.1.50
HMPK1	hydroxymethylpyrimidine kinase (ATP)	4ahmmp[c] + atp[c] <=> 4ampm[c] + adp[c]	Moth_0867	Moth_0867		Cofactor and Prosthetic Group Biosynthesis	1	-1000	1000	0	2.7.1.49
IPDDIi	Isopentenyl-diphosphate delta3-delta2-isomerase	ipdp[c] <=> dmpp[c]	Moth_1328	Moth_1328		Cofactor and Prosthetic Group Biosynthesis	1	-1000	1000	0	5.3.3.2
IPDPS	1-hydroxy-2-methyl-2-(E)-butenyl 4-diphosphate reductase (ipdp)	h[c] + nadh[c] + h2mb4p[c] -> ipdp[c] + h2o[c] + nad[c]	Moth_1329	Moth_1329		Cofactor and Prosthetic Group Biosynthesis	0	0	1000	0	1.17.1.2
MAN1PT1	GTP:alpha-D-mannose-1-phosphate guanylyltransferase	man1p[c] + gtp[c] <=> ppi[c] + gdpmann[c]	Moth_1925	Moth_1925		Cofactor and Prosthetic Group Biosynthesis	1	-1000	1000	0	2.7.7.13
MECDPS	2-C-methyl-D-erythritol 2,4-cyclodiphosphate synthase	2p4c2me[c] <=> 2mecdp[c] + cmp[c]	Moth_2486	Moth_2486		Cofactor and Prosthetic Group Biosynthesis	1	-1000	1000	0	4.6.1.12
MEPCT	CTP: 2-C-Methyl-D-erythritol 4-phosphate cytidylyltransferase	2me4p[c] + ctp[c] <=> 4c2me[c] + ppi[c]	Moth_2487	Moth_2487		Cofactor and Prosthetic Group Biosynthesis	1	-1000	1000	0	2.7.7.60
MOHMT	5,10-Methylenetetrahydrofolate:3-methyl-2-oxobutanoate	3mob[c] + h2o[c] + mlthf[c] <=> thf[c] + 2dhp[c]	Moth_0121	Moth_0121		Cofactor and Prosthetic Group Biosynthesis	1	-1000	1000	0	2.1.2.11
NADK	NAD kinase	atp[c] + nad[c] <=> adp[c] + h[c] + nadp[c]	Moth_1509	Moth_1509		Cofactor and Prosthetic Group Biosynthesis	1	-1000	1000	0	2.7.1.23
NADS1	Deamino-NAD+:ammonia ligase (AMP-forming)	nh4[c] + dnad[c] + atp[c] -> ppi[c] + amp[c] + nad[c]	Moth_0553	Moth_0553		Cofactor and Prosthetic Group Biosynthesis	0	0	1000	0	6.3.1.5
NADS2	Deamido-NAD+:L-glutamine amido-ligase (AMP-forming)	gln-L[c] + dnad[c] + h2o[c] + atp[c] -> ppi[c] + glu-L[c] + amp[c] + nad[c]	Moth_0553	Moth_0553		Cofactor and Prosthetic Group Biosynthesis	0	0	1000	0	6.3.5.1
NNAM	Nicotinamide amidohydrolase	ncam[c] + h2o[c] -> nh4[c] + nac[c]	Moth_0248	Moth_0248		Cofactor and Prosthetic Group Biosynthesis	0	0	1000	0	3.5.1.19
NNATr	ATP:nicotinamide-nucleotide adenylyltransferase	atp[c] + nicrnt[c] <=> dnad[c] + ppi[c]	Moth_0564	Moth_0564		Cofactor and Prosthetic Group Biosynthesis	1	-1000	1000	0	2.7.7.1
NNDPR	nicotinate-nucleotide diphosphorylase (carboxylating)	prpp[c] + 2 h[c] + quln[c] -> ppi[c] + nicrnt[c] + co2[c]	Moth_1779	Moth_1779		Cofactor and Prosthetic Group Biosynthesis	0	0	1000	0	2.4.2.19
OPHBDC	Octaprenyl-hydroxybenzoate decarboxylase	h[c] + 3ophb[c] -> co2[c] + 2oph[c]	( ( Moth_0095 ) or ( Moth_0094 ) )	Moth_0094 Moth_0095		Cofactor and Prosthetic Group Biosynthesis	0	0	1000	0	4.1.1.-
PANTS	(R)-Pantoate:beta-alanine ligase (AMP-forming)	ala-B[c] + pant-R[c] + atp[c] -> ppi[c] + pnto-R[c] + amp[c]	Moth_0141	Moth_0141		Cofactor and Prosthetic Group Biosynthesis	0	0	1000	0	6.3.2.1
PMPK	ATP:4-amino-2-methyl-5-phosphomethylpyrimidine phosphotransferase	4ampm[c] + atp[c] <=> adp[c] + 2mahmp[c]	Moth_0867	Moth_0867		Cofactor and Prosthetic Group Biosynthesis	1	-1000	1000	0	2.7.4.7
PNTK	ATP:pantothenate 4'-phosphotransferase	atp[c] + pnto-R[c] <=> adp[c] + 4ppan[c]	Moth_0146	Moth_0146		Cofactor and Prosthetic Group Biosynthesis	1	-1000	1000	0	2.7.1.33
PPCDC	N-[(R)-4'-Phosphopantothenoyl]-L-cysteine carboxy-lyase	h[c] + 4ppcys[c] -> co2[c] + pan4p[c]	Moth_0893	Moth_0893		Cofactor and Prosthetic Group Biosynthesis	0	0	1000	0	4.1.1.36
PPNCL2	phosphopantothenate-cysteine ligase	ctp[c] + 4ppan[c] + cys-L[c] -> ppi[c] + cmp[c] + 4ppcys[c]	Moth_0893	Moth_0893		Cofactor and Prosthetic Group Biosynthesis	0	0	1000	0	6.3.2.5
PTPAT	ATP:pantetheine-4'-phosphate adenylyltransferase	atp[c] + pan4p[c] <=> dpcoa[c] + ppi[c]	Moth_1871	Moth_1871		Cofactor and Prosthetic Group Biosynthesis	1	-1000	1000	0	2.7.7.3
RBFK	ATP:riboflavin 5'-phosphotransferase	atp[c] + ribflv[c] <=> fmn[c] + adp[c]	Moth_1054	Moth_1054		Cofactor and Prosthetic Group Biosynthesis	1	-1000	1000	0	2.7.1.26
RBFSa	6,7-Dimethyl-8-(1-D-ribityl)lumazine:6,7-dimethyl-8-(1-D-ribityl)	4r5au[c] + db4p[c] <=> pi[c] + h[c] + dmlz[c] + 2 h2o[c]	Moth_0918	Moth_0918		Cofactor and Prosthetic Group Biosynthesis	1	-1000	1000	0	2.5.1.9
RBFSb	6,7-Dimethyl-8-(1-D-ribityl)lumazine:6,7-dimethyl-8-(1-D-ribityl)	2 dmlz[c] -> 4r5au[c] + ribflv[c]	Moth_0916	Moth_0916		Cofactor and Prosthetic Group Biosynthesis	0	0	1000	0	2.5.1.9
THFGLUS	Tetrahydrofolate:L-glutamate gamma-ligase (ADP-forming)	thf[c] + atp[c] + glu-L[c] -> pi[c] + thfglu[c] + h[c] + adp[c]	Moth_0533	Moth_0533		Cofactor and Prosthetic Group Biosynthesis	0	0	1000	0	6.3.2.17
THZPSN	thiazole phosphate synthesis	dxyl5p[c] + atp[c] + cys-L[c] + tyr-L[c] -> h2o[c] + ala-L[c] + ppi[c] + 4mpetz[c] + 4hba[c] + co2[c] + amp[c]	( ( Moth_1403 and Moth_1734 and Moth_0198 ) or ( Moth_1652 and Moth_1734 and Moth_0198 ) or ( Moth_0199 and Moth_1734 and Moth_0198 ) or ( Moth_2214 and Moth_1734 and Moth_0198 ) )	Moth_1403 Moth_1652 Moth_1734 Moth_0198 Moth_0199 Moth_2214		Cofactor and Prosthetic Group Biosynthesis	0	0	1000	0	Undetermined
TMPKr	thiamine-phosphate kinase	atp[c] + thmmp[c] <=> adp[c] + thmpp[c]	( ( Moth_1157 ) or ( Moth_0697 ) )	Moth_1157 Moth_0697		Cofactor and Prosthetic Group Biosynthesis	1	-1000	1000	0	2.7.4.16
TMPPP	thiamine-phosphate diphosphorylase	h[c] + 4mpetz[c] + 2mahmp[c] <=> ppi[c] + thmmp[c]	( ( Moth_2162 ) or ( Moth_0547 ) )	Moth_2162 Moth_0547		Cofactor and Prosthetic Group Biosynthesis	1	-1000	1000	0	2.5.1.3
URFGTT	UDP-L-rhamnose:flavonol-3-O-D-glucoside L-rhamnosyltransferase	2ombz[c] + amet[c] -> h[c] + 2ommb[c] + ahcys[c]	Moth_1280	Moth_1280		Cofactor and Prosthetic Group Biosynthesis	0	0	1000	0	2.1.1.201
DMATT	Dimethylallyl-diphosphate:isopentenyl-diphosphate	ipdp[c] + dmpp[c] -> grdp[c] + ppi[c]	( ( Moth_1252 ) or ( Moth_1513 ) )	Moth_1252 Moth_1513		Cofactor and Prosthetic Group Biosynthesis	0	0	1000	0	2.5.1.1
FRTT	farnesyltranstransferase	ipdp[c] + frdp[c] -> ggdp[c] + ppi[c]	( ( Moth_1513 ) or ( Moth_1252 ) )	Moth_1252 Moth_1513		Cofactor and Prosthetic Group Biosynthesis	0	0	1000	0	2.5.1.29
OCTDPS	Octaprenyl pyrophosphate synthase	frdp[c] + 4 ipdp[c] -> octdp[c] + 4 ppi[c]	( ( Moth_0158) or ( Moth_1252 ) or ( Moth_1513 ) )	Moth_0158 Moth_1252 Moth_1513		Cofactor and Prosthetic Group Biosynthesis	0	0	1000	0	2.5.1.30
GRTT	geranyltranstransferase	ipdp[c] + grdp[c] -> ppi[c] + frdp[c]	( ( Moth_1252 ) or ( Moth_1513 ) )	Moth_1252 Moth_1513		Cofactor and Prosthetic Group Biosynthesis	0	0	1000	0	2.5.1.1
AOBUTDs	L-2-amino-3-oxobutanoate decarboxylation (spontaneous)	h[c] + 2aobut[c] -> aact[c] + co2[c]	NON-GENE ASSOCIATED	NON-GENE ASSOCIATED		Cofactor and Prosthetic Group Biosynthesis	0	0	1000	0	Undetermined
AOXHEXCYCL	6-Amino-2-oxohexanoate cyclation	6a2ohxnt[c] -> h[c] + h2o[c] + 1pipdn2c[c]	NON-GENE ASSOCIATED	NON-GENE ASSOCIATED		Cofactor and Prosthetic Group Biosynthesis	0	0	1000	0	Undetermined
SELNPS	ATP:selenide, water phosphotransferase	h2o[c] + seln[c] + atp[c] <=> pi[c] + 2 h[c] + selnp[c] + amp[c]	Moth_1625	Moth_1625		Cofactor and Prosthetic Group Biosynthesis	1	-1000	1000	0	2.7.9.3
MECDPDH2	4-hydroxy-3-methylbut-2-en-1-yl diphosphate synthase	2mecdp[c] + nadh[c] -> h2mb4p[c] + h2o[c] + nad[c]	Moth_1043	Moth_1043		Cofactor and Prosthetic Group Biosynthesis	0	0	1000	0	1.17.7.1
GLUTRR	L-glutamate-semialdehyde: NADP+	nadph[c] + glutrna[c] + h[c] <=> glu1sa[c] + nadp[c] + trnaglu[c]	Moth_1250	Moth_1250		Cofactor and Prosthetic Group Biosynthesis	1	-1000	1000	0	1.2.1.70
G1SAT	glutamate-1-semialdehyde aminotransferase	5aop[c] <=> glu1sa[c]	Moth_1244	Moth_1244		Cofactor and Prosthetic Group Biosynthesis	1	-1000	1000	0	5.4.3.8
PPBNGS	porphobilinogen synthase	2 5aop[c] -> h[c] + ppbng[c] + 2 h2o[c]	Moth_1246	Moth_1246		Cofactor and Prosthetic Group Biosynthesis	0	0	1000	0	4.2.1.24
HMBS	hydroxymethylbilane synthase	4 ppbng[c] + h2o[c] -> 4 nh4[c] + hmbil[c]	Moth_1249	Moth_1249		Cofactor and Prosthetic Group Biosynthesis	0	0	1000	0	2.5.1.61
UPP3S	uroporphyrinogen-III synthase	hmbil[c] <=> h2o[c] + uppg3[c]	Moth_1248	Moth_1248		Cofactor and Prosthetic Group Biosynthesis	1	-1000	1000	0	4.2.1.75
UPP3MT	uroporphyrinogen methyltransferase	2 amet[c] + uppg3[c] <=> 2 h[c] + dscl[c] + 2 ahcys[c]	Moth_1248	Moth_1248		Cofactor and Prosthetic Group Biosynthesis	1	-1000	1000	0	2.1.1.107
SHCHD2	sirohydrochlorin dehydrogenase (NAD)	dscl[c] + nad[c] <=> h[c] + shcl[c] + nadh[c]	( ( Moth_1251 ) or ( Moth_1248 ) )	Moth_1248 Moth_1251		Cofactor and Prosthetic Group Biosynthesis	1	-1000	1000	0	1.3.1.76
SHCHF	S-Adenosyl-L-methionine:uroporphyrin-III C-methyltransferase	2 h[c] + sheme[c] <=> fe2[c] + shcl[c]	Moth_1251	Moth_1251		Cofactor and Prosthetic Group Biosynthesis	1	-1000	1000	0	4.99.1.4
SHCHCC	sirohydrochlorin cobaltochelatase	2 h[c] + shcl[c] + cobalt2[c] <=> copre2[c]	Moth_1096	Moth_1096		Cofactor and Prosthetic Group Biosynthesis	1	-1000	1000	0	4.99.1.3
CPC2MT	cobalt-precorrin-2 C20-methyltransferase	copre2[c] + amet[c] <=> h[c] + ahcys[c] + copre3[c]	Moth_1091	Moth_1091		Cofactor and Prosthetic Group Biosynthesis	1	-1000	1000	0	2.1.1.151
CPC3MT	cobalt-precorrin-3B C17-methyltransferase	copre3[c] + amet[c] <=> h[c] + copre4[c] + ahcys[c]	Moth_1094	Moth_1094		Cofactor and Prosthetic Group Biosynthesis	1	-1000	1000	0	2.1.1.131
CPC4MT	cobalt-precorrin-4 methyltransferase	copre4[c] + amet[c] <=> copre5[c] + ahcys[c]	Moth_1092	Moth_1092		Cofactor and Prosthetic Group Biosynthesis	1	-1000	1000	0	2.1.1.133
CPC5MT	cobalt-precorrin-5 C1-methyltransferase	copre5[c] + h2o[c] <=> cp5b[c] + acald[c] + h[c]	Moth_1093	Moth_1093		Cofactor and Prosthetic Group Biosynthesis	1	-1000	1000	0	3.7.1.12
CPC6S	precorrin-6A synthase	amet[c] + cp5b[c] <=> h[c] + ahcys[c] + copre6[c]	Moth_1088	Moth_1088		Cofactor and Prosthetic Group Biosynthesis	1	-1000	1000	0	2.1.1.195
CPC6R	precorrin-6A reductase	nadph[c] + h[c] + copre6[c] <=> codhpre6[c] + nadp[c]	( ( Moth_1095 ) or ( Moth_1223 ) )	Moth_1095 Moth_1223		Cofactor and Prosthetic Group Biosynthesis	1	-1000	1000	0	1.3.1.54
CPC6MT	cobalt-precorrin-6 C5-methyltransferase	codhpre6[c] + 2 amet[c] <=> cp7[c] + h[c] + 2 ahcys[c] + co2[c]	Moth_1089	Moth_1089		Cofactor and Prosthetic Group Biosynthesis	1	-1000	1000	0	2.1.1.-
CPC7MT	cobalt-precorrin-7 C15-methyltransferase	cp7[c] + amet[c] <=> copre8[c] + ahcys[c]	Moth_1090	Moth_1090		Cofactor and Prosthetic Group Biosynthesis	1	-1000	1000	0	2.1.1.196
CPC8MM	precorrin-8X methylmutase	copre8[c] <=> cobya[c]	Moth_1097	Moth_1097		Cofactor and Prosthetic Group Biosynthesis	1	-1000	1000	0	5.4.1.2
CYRDAS	Cob(II)yrinate a,c-diamide synthase (glutamine-hydrolysing)	2 atp[c] + cobya[c] + 2 gln-L[c] + h2o[c] -> 2 adp[c] + co2dam[c] + 2 glu-L[c] + h[c] + ppi[c]	( Moth_1100 and Moth_1628 )	Moth_1100 Moth_1628		Cofactor and Prosthetic Group Biosynthesis	0	0	1000	0	6.3.5.11
CYRDAR	cob(II)yrinic acid a,c-diamide reductase	2 co2dam[c] + nadh[c] -> 2 co1dam[c] + h[c] + nad[c]	Moth_1351	Moth_1351		Cofactor and Prosthetic Group Biosynthesis	0	0	1000	0	1.16.8.1
CYRDAAT	cob(I)yrinic acid a,c-diamide adenosyltransferase	atp[c] + co1dam[c] + h[c] -> adcobdam[c] + pppi[c]	Moth_1351	Moth_1351		Cofactor and Prosthetic Group Biosynthesis	0	0	1000	0	2.5.1.17
CBIAT	Cobinamide adenyltransferase	atp[c] + cbi[c] <=> pppi[c] + adocbi[c]	Moth_1351	Moth_1351		Cofactor and Prosthetic Group Biosynthesis	1	-1000	1000	0	2.5.1.17
CBLAT	cob(I)alamin adenosyltransferase	cbl1[c] + atp[c] <=> pppi[c] + adocbl[c]	Moth_1351	Moth_1351		Cofactor and Prosthetic Group Biosynthesis	1	-1000	1000	0	2.5.1.17
ADCYRS	adenosylcobyric acid synthase (glutamine-hydrolysing)	4 gln-L[c] + 4 h2o[c] + 4 atp[c] + adcobdam[c] <=> 4 pi[c] + 4 h[c] + 4 adp[c] + adcobhex[c] + 4 glu-L[c]	Moth_1098	Moth_1098		Cofactor and Prosthetic Group Biosynthesis	1	-1000	1000	0	6.3.5.10
ADCPS1	adenosylcobinamide-phosphate synthase	appl[c] + adcobhex[c] + atp[c] <=> pi[c] + h[c] + adocbi[c] + adp[c]	Moth_1099	Moth_1099		Cofactor and Prosthetic Group Biosynthesis	1	-1000	1000	0	6.3.1.10
ADOCBIK	Adenosyl cobinamide kinase	adocbi[c] + atp[c] <=> adocbip[c] + h[c] + adp[c]	Moth_1087	Moth_1087		Cofactor and Prosthetic Group Biosynthesis	1	-1000	1000	0	2.7.1.156
THRK	L-threonine kinase	thr-L[c] + atp[c] <=> thrp[c] + adp[c]	Moth_1103	Moth_1103		Cofactor and Prosthetic Group Biosynthesis	1	-1000	1000	0	2.7.1.177
ADCPS2	adenosylcobinamide-phosphate synthase	applp[c] + adcobhex[c] + atp[c] <=> pi[c] + adocbip[c] + 2 h[c] + adp[c]	Moth_1099	Moth_1099		Cofactor and Prosthetic Group Biosynthesis	1	-1000	1000	0	6.3.1.10
ACBIPGT	Adenosyl cobinamide phosphate guanyltransferase	adocbip[c] + h[c] + gtp[c] <=> agdpcbi[c] + ppi[c]	Moth_1087	Moth_1087		Cofactor and Prosthetic Group Biosynthesis	1	-1000	1000	0	2.7.7.62
NNDMBRT	Nicotinate-nucleotide dimethylbenzimidazole phosphoribosyltransferase	dmbzid[c] + nicrnt[c] <=> h[c] + 5prdmbz[c] + nac[c]	( ( Moth_1101 ) or ( Moth_1721 ) )	Moth_1101 Moth_1721		Cofactor and Prosthetic Group Biosynthesis	1	-1000	1000	0	2.4.2.21
RZ5PP	alpha-ribazole 5-phosphate phosphatase	h2o[c] + 5prdmbz[c] -> pi[c] + rdmbzi[c] + h[c]	Moth_1105	Moth_1105		Cofactor and Prosthetic Group Biosynthesis	0	0	1000	0	3.1.3.73
ADOCBLS	Adenosylcobalamin 5'-phosphate synthase	rdmbzi[c] + agdpcbi[c] <=> gmp[c] + adocbl[c]	Moth_1102	Moth_1102		Cofactor and Prosthetic Group Biosynthesis	1	-1000	1000	0	2.7.8.26
HGBS	hydrogenobyrinic-acid a,c-diamide synthase	2 gln-L[c] + hgbyr[c] + h2o[c] + 2 atp[c] <=> hgbam[c] + ppi[c] + 2 adp[c] + 2 glu-L[c]	( Moth_1100 and Moth_1168 )	Moth_1100 Moth_1168		Cofactor and Prosthetic Group Biosynthesis	1	-1000	1000	0	6.3.5.9
CPPPGO	Coproporphyrinogen dehydrogenase	cpppg3[c] + 2 amet[c] <=> pppg9[c] + 2 co2[c] + 2 met-L[c] + 2 5doxa[c]	Moth_0582	Moth_0582		Cofactor and Prosthetic Group Biosynthesis	1	-1000	1000	0	1.3.3.3
PC11M	S-adenosyl-L-methionine:precorrin-4 C11 methyltransferase	amet[c] + pre4[c] <=> h[c] + pre5[c] + ahcys[c]	Moth_1092	Moth_1092		Cofactor and Prosthetic Group Biosynthesis	1	-1000	1000	0	2.1.1.133
PC17M	S-Adenosyl-L-methionine:precorrin-3B C17-methyltransferase	pre3b[c] + amet[c] <=> 2 h[c] + ahcys[c] + pre4[c]	Moth_1094	Moth_1094		Cofactor and Prosthetic Group Biosynthesis	1	-1000	1000	0	2.1.1.131
PC20M	S-Adenosyl-L-methionine:precorrin-4 C20-methyltransferase	h[c] + dscl[c] + amet[c] <=> ahcys[c] + pre3a[c]	Moth_1091	Moth_1091		Cofactor and Prosthetic Group Biosynthesis	1	-1000	1000	0	2.1.1.130
PC6AR	precorrin-6Y:NADP+ oxidoreductase	pre6b[c] + nadp[c] <=> nadph[c] + h[c] + pre6a[c]	( ( Moth_1095 ) or ( Moth_1223 ) )	Moth_1095 Moth_1223		Cofactor and Prosthetic Group Biosynthesis	1	-1000	1000	0	1.3.1.54
PC6YM	S-Adenosyl-L-methionine:1-precorrin-6Y C5,15-methyltransferase	pre6b[c] + 2 amet[c] <=> 2 h[c] + 2 ahcys[c] + co2[c] + pre8[c]	( Moth_1089 and Moth_1090 )	Moth_1089 Moth_1090		Cofactor and Prosthetic Group Biosynthesis	1	-1000	1000	0	2.1.1.132
PC8XM	Precorrin-8X 11,12-methylmutase	h[c] + pre8[c] <=> hgbyr[c]	Moth_1097	Moth_1097		Cofactor and Prosthetic Group Biosynthesis	1	-1000	1000	0	5.4.1.2
X0001	Lumped reaction for glycoaldehyde degradation	coa[c] + gcald[c] -> glyc[c] + h2o[c]	NON-GENE ASSOCIATED	NON-GENE ASSOCIATED		Cofactor and Prosthetic Group Biosynthesis	0	0	1000	0	Undetermined
X0002	Lumped reaction for acetaldehyde degradation	coa[c] + acald[c] -> glyc[c] + h2o[c]	NON-GENE ASSOCIATED	NON-GENE ASSOCIATED		Cofactor and Prosthetic Group Biosynthesis	0	0	1000	0	Undetermined
ADCL	4-amino-4-deoxychorismate pyruvate-lyase	4adcho[c] -> 4abz[c] + h[c] + pyr[c]	Moth_2109	Moth_2109		Cofactor and Prosthetic Group Biosynthesis	0	0	1000	0	4.1.3.38
ADCS	4-amino-4-deoxychorismate synthase	gln-L[c] + chor[c] <=> 4adcho[c] + glu-L[c]	( ( Moth_1341 ) or ( Moth_2108 ) )	Moth_1341 Moth_2108		Cofactor and Prosthetic Group Biosynthesis	1	-1000	1000	0	2.6.1.85
AMMQT8_2	S-adenosylmethione:2-demethylmenaquinone methyltransferase	2dmmq8[c] + amet[c] -> h[c] + mqn8[c] + ahcys[c]	Moth_1280	Moth_1280		Cofactor and Prosthetic Group Biosynthesis	0	0	1000	0	2.1.1.163
DHNAOT4	1,4-dihydroxy-2-naphthoate octaprenyltransferase	h[c] + dhna[c] + octdp[c] -> 2dmmql8[c] + ppi[c] + co2[c]	Moth_0096	Moth_0096		Cofactor and Prosthetic Group Biosynthesis	0	0	1000	0	2.5.1.74
NPHS	O-Succinylbenzoyl-CoA 1,4-dihydroxy-2-naphthoate-lyase	sbzcoa[c] -> dhna[c] + coa[c]	NON-GENE ASSOCIATED	NON-GENE ASSOCIATED		Cofactor and Prosthetic Group Biosynthesis	0	0	1000	0	4.1.3.36
SUCBZL	O-Succinylbenzoate:CoA ligase (AMP-forming)	h[c] + sucbz[c] + atp[c] + coa[c] -> ppi[c] + sbzcoa[c] + amp[c]	NON-GENE ASSOCIATED	NON-GENE ASSOCIATED		Cofactor and Prosthetic Group Biosynthesis	0	0	1000	0	6.2.1.26
SUCBZS	O-succinylbenzoate-CoA synthase	2shchc[c] -> sucbz[c] + h2o[c]	NON-GENE ASSOCIATED	NON-GENE ASSOCIATED		Cofactor and Prosthetic Group Biosynthesis	0	0	1000	0	4.2.1.-
SHCHCS	SHCHC synthase	h[c] + ichor[c] + akg[c] -> pyr[c] + co2[c] + 2shchc[c]	NON-GENE ASSOCIATED	NON-GENE ASSOCIATED		Cofactor and Prosthetic Group Biosynthesis	0	0	1000	0	2.5.1.64
ICHORSi	Chorismate hydroxymutase	chor[c] <=> ichor[c]	NON-GENE ASSOCIATED	NON-GENE ASSOCIATED		Cofactor and Prosthetic Group Biosynthesis	1	-1000	1000	0	5.4.4.2
NADH9	NADH dehydrogenase (demethylmenaquinone-8 0 protons)	2dmmq8[c] + h[c] + nadh[c] <=> 2dmmql8[c] + nad[c]	Moth_0437	Moth_0437		Cofactor and Prosthetic Group Biosynthesis	1	-1000	1000	0	1.6.5.3
NADH10	NADH dehydrogenase (menaquinone-8 0 protons)	mqn8[c] + h[c] + nadh[c] <=> nad[c] + mql8[c]	Moth_1887	Moth_1887		Cofactor and Prosthetic Group Biosynthesis	1	-1000	1000	0	1.6.5.3
NADK1	NAD kinase (GTP)	gtp[c] + nad[c] <=> gdp[c] + h[c] + nadp[c]	Moth_1509	Moth_1509		Cofactor and Prosthetic Group Biosynthesis	1	-1000	1000	0	2.7.1.23
NADK2	NAD kinase (dATP)	datp[c] + nad[c] <=> dadp[c] + h[c] + nadp[c]	Moth_1509	Moth_1509		Cofactor and Prosthetic Group Biosynthesis	1	-1000	1000	0	2.7.1.23
NADK3	NAD kinase (dGTP)	dgtp[c] + nad[c] <=> dgdp[c] + h[c] + nadp[c]	Moth_1509	Moth_1509		Cofactor and Prosthetic Group Biosynthesis	1	-1000	1000	0	2.7.1.23
NADK4	NAD kinase (dCTP)	dctp[c] + nad[c] <=> dcdp[c] + h[c] + nadp[c]	Moth_1509	Moth_1509		Cofactor and Prosthetic Group Biosynthesis	1	-1000	1000	0	2.7.1.23
NADK5	NAD kinase (dTTP)	dttp[c] + nad[c] <=> dtdp[c] + h[c] + nadp[c]	Moth_1509	Moth_1509		Cofactor and Prosthetic Group Biosynthesis	1	-1000	1000	0	2.7.1.23
SPODM	superoxide dismutase	2 h[c] + 2 o2s[c] -> h2o2[c] + o2[c]	Moth_1916	Moth_1916		Energy Metabolism	0	0	1000	0	Undetermined
AHC	S-Adenosyl-L-homocysteine hydrolase	h2o[c] + ahcys[c] <=> adn[c] + hcys-L[c]	Moth_0706	Moth_0706		Energy Metabolism	1	-1000	1000	0	3.3.1.1
CMLDC	4-Carboxymuconolactone carboxy-lyase	h[c] + 2c25dho[c] -> 5odhf2a[c] + co2[c]	Moth_1895	Moth_1895		Energy Metabolism	0	0	1000	0	4.1.1.44
DGK1	ATP:(d)GMP phosphotransferase	dgmp[c] + atp[c] <=> adp[c] + dgdp[c]	Moth_2099	Moth_2099		Energy Metabolism	1	-1000	1000	0	2.7.4.8
G3PD2	sn-Glycerol-3-phosphate:NADP+ 2-oxidoreductase	glyc3p[c] + nadp[c] <=> nadph[c] + h[c] + dhap[c]	Moth_1320	Moth_1320		Energy Metabolism	1	-1000	1000	0	1.1.1.94
GK1	guanylate kinase (GMP:ATP)	gmp[c] + atp[c] <=> adp[c] + gdp[c]	Moth_2099	Moth_2099		Energy Metabolism	1	-1000	1000	0	2.7.4.8
GK2	guanylate kinase (GMP:dATP)	gmp[c] + datp[c] <=> dadp[c] + gdp[c]	Moth_2099	Moth_2099		Energy Metabolism	1	-1000	1000	0	2.7.4.8
MGSA	Glycerone-phosphate phospho-lyase	dhap[c] -> pi[c] + mthgxl[c] + h[c]	Moth_1275	Moth_1275		Energy Metabolism	0	0	1000	0	4.2.3.3
NITr	Nitrogenase	8 fdxrd[c] + 16 h2o[c] + 16 atp[c] + n2[c] <=> 16 pi[c] + 2 nh4[c] + 8 fdxox[c] + 6 h[c] + 16 adp[c] + h2[c]	Moth_0551	Moth_0551		Energy Metabolism	1	-1000	1000	0	1.18.6.1
NTRIRx	ammonium-hydroxide:NADP+ oxidoreductase	no2[c] + 5 h[c] + 3 nadh[c] -> nh4[c] + 2 h2o[c] + 3 nad[c]	( ( Moth_1290 and Moth_1291 ) or ( Moth_1909 and Moth_0506 ) or ( Moth_0724 ) )	Moth_1290 Moth_1291 Moth_1909 Moth_0506 Moth_0724		Energy Metabolism	0	0	1000	0	1.7.1.4
NTRIRy	ammonium-hydroxide:NAD(P)+ oxidoreductase	3 nadph[c] + no2[c] + 5 h[c] -> nh4[c] + 2 h2o[c] + 3 nadp[c]	( ( Moth_0506 ) or ( Moth_1290 and Moth_1291 ) or ( Moth_0724 ) )	Moth_1290 Moth_1291 Moth_0506 Moth_0724		Energy Metabolism	0	0	1000	0	1.7.1.4
PMANM	D-Mannose 6-phosphate 1,6-phosphomutase	man6p[c] <=> man1p[c]	Moth_1925	Moth_1925		Energy Metabolism	1	-1000	1000	0	5.4.2.8
PPA	Pyrophosphate phosphohydrolase	h2o[c] + ppi[c] -> 2 pi[c] + 2 h[c]	Moth_2414	Moth_2414		Energy Metabolism	0	0	1000	0	3.6.1.1
PPM	D-Ribose 1,5-phosphomutase	r1p[c] <=> r5p[c]	Moth_1500	Moth_1500		Energy Metabolism	1	-1000	1000	0	5.4.2.2
SBTD_D2	D-Glucitol:NAD+ 2-oxidoreductase	sbt-D[c] + nad[c] <=> h[c] + fru[c] + nadh[c]	Moth_0475	Moth_0475		Energy Metabolism	1	-1000	1000	0	1.1.1.14
THIORDXi	hydrogen peroxide reductase (thioredoxin)	trdrd[c] + h2o2[c] -> trdox[c] + 2 h2o[c]	( ( Moth_1673 ) or ( Moth_0927 ) )	Moth_1673 Moth_0927		Energy Metabolism	0	0	1000	0	Undetermined
TRDR	TRDR	nadph[c] + trdox[c] + h[c] <=> trdrd[c] + nadp[c]	Moth_2420	Moth_2420		Energy Metabolism	1	-1000	1000	0	1.8.1.9
ATPS4r	ATP synthase (four protons for one ATP)	pi[c] + 4 h[e] + adp[c] <=> 3 h[c] + h2o[c] + atp[c]	( Moth_2377 and Moth_2378 and Moth_2379 and Moth_2380 and Moth_2381 and Moth_2382 and Moth_2383 and Moth_2384 and Moth_2386 )	Moth_2377 Moth_2378 Moth_2379 Moth_2380 Moth_2381 Moth_2382 Moth_2383 Moth_2384 Moth_2386		Energy Metabolism	1	-1000	1000	0	3.6.3.14
ATPM	ATP maintenance requirement	h2o[c] + atp[c] -> pi[c] + h[c] + adp[c]	NON-GENE ASSOCIATED	NON-GENE ASSOCIATED		Energy Metabolism	0	0	1000	0	3.6.1.3
FDH	Formate dehydrogenase (NADP+)	nadph[c] + co2[c] -> for[c] + nadp[c]	( Moth_2312 and Moth_2313 and Moth_2314 )	Moth_2312 Moth_2313 Moth_2314		Energy Metabolism	0	0	1000	0	1.2.1.43
FTHFL	Formate-tetrahydrofolate ligase	thf[c] + atp[c] + for[c] -> pi[c] + adp[c] + 10fthf[c]	Moth_0109	Moth_0109		Energy Metabolism	0	0	1000	0	6.3.4.3
MTHFC	5,10-Methenyltetrahydrofolate cyclohydrolase	h[c] + 10fthf[c] -> h2o[c] + methf[c]	Moth_1516	Moth_1516		Energy Metabolism	0	0	1000	0	3.5.4.9
MTHFD	5,10-Methylenetetrahydrofolate dehydrogenase (NADP+)	nadph[c] + methf[c] -> nadp[c] + mlthf[c]	Moth_1516	Moth_1516		Energy Metabolism	0	0	1000	0	1.5.1.5
FRHD	ferredoxin hydrogenase	2 fdxrd[c] + 3 h[c] <=> 2 fdxox[c] + h2[c] + h[e]	( Moth_0450 and Moth_0451 and Moth_0452 and Moth_2184 and Moth_2185 and Moth_2186 and Moth_2187 and Moth_2188 and Moth_2189 and Moth_2190 and Moth_2191 and Moth_2192 and Moth_2193 )	Moth_0450 Moth_0451 Moth_0452 Moth_2184 Moth_2185 Moth_2186 Moth_2187 Moth_2188 Moth_2189 Moth_2190 Moth_2191 Moth_2192 Moth_2193		Energy Metabolism	1	-1000	1000	0	1.12.7.2
MMTR	Methanol methyltransferase	meoh[c] + thf[c] + h[c] -> 5mthf[c] + h2o[c]	( Moth_0385 and Moth_0386 and Moth_0387 ) or ( Moth_1197 ) or ( Moth_1206 and Moth_1207 and Moth_1208 and Moth_1209 and Moth_1213 ) or ( Moth_1311 and Moth_1314 and Moth_1316 and Moth_1317 and Moth_1318 ) or ( Moth_1447 ) or ( Moth_2100 and Moth_2102 and Moth_2114 and Moth_2115 and Moth_2116 and Moth_2346 )	Moth_0385 Moth_0386 Moth_0387 Moth_1197 Moth_1206 Moth_1207 Moth_1208 Moth_1209 Moth_1213 Moth_1311 Moth_1314 Moth_1316 Moth_1317 Moth_1318 Moth_1447 Moth_2100 Moth_2102 Moth_2114 Moth_2115 Moth_2116 Moth_2346		Energy Metabolism	0	0	1000	0
PTAr	Phosphotransacetylase	accoa[c] + pi[c] <=> actp[c] + coa[c]	(Moth_0864 and Moth_1181)	Moth_0864 Moth_1181		Energy Metabolism	1	-1000	1000	0	2.3.1.8
ACKr	Acetate kinase	actp[c] + adp[c] <=> ac[c] + atp[c]	Moth_0940	Moth_0940		Energy Metabolism	1	-1000	1000	0	2.7.2.1
HDH1	NADP reducing hydrogenase (HytABCDEF)	h2[c] + nadp[c] <=> 2 h[c] + nadph[c]	( Moth_1883 and Moth_1884 and Moth_1885 and Moth_1886 and Moth_1887 and Moth_1888 )	Moth_1883 Moth_1884 Moth_1885 Moth_1886 Moth_1887 Moth_1888 )		Energy Metabolism	0	0	1000	0	1
HYDFDNr	Electron bifurcating Ferredoxin:NAD hydrogenase (HydABC)	2 fdxox[c] + 2 h2[c] + nad[c] <=> 2 fdxrd[c] + 3 h[c] + nadh[c]	( Moth_1717 and Moth_1718 and Moth_1719 )	Moth_1717 Moth_1718 Moth_1719		Energy Metabolism	1	-1000	1000	0	1
FRNDPRr	Electron bifurcating Ferredoxin:NADP oxidoreductase (NfnAB)	fdxox[c] + nad[c] + 2 nadph[c] <=> fdxrd[c] + h[c] + nadh[c] + 2 nadp[c]	( Moth_1517 and Moth_1518 )	Moth_1517 Moth_1518		Energy Metabolism	1	-1000	1000	0	1
FRUK	Fructokinase	f1p[c] + atp[c] <=> fdp[c] + adp[c]	( ( Moth_0012 ) or ( Moth_0615 ) )	Moth_0012 Moth_0615		Energy Metabolism	1	-1000	1000	0	2.7.1.56
PC	Pyruvate carboxylase	hco3[c] + pyr[c] + atp[c] <=> pi[c] + oaa[c] + h[c] + adp[c]	( Moth_1524 and Moth_1525 )	Moth_1524 Moth_1525		Energy Metabolism	1	-1000	1000	0	6.4.1.1
G3PD1	glycerol-3-phosphate dehydrogenase (NAD)	glyc3p[c] + nad[c] <=> h[c] + nadh[c] + dhap[c]	Moth_1320	Moth_1320		Energy Metabolism	1	-1000	1000	0	1.1.1.94
DMSOR1	Dimethyl sulfoxide reductase (Menaquinol 8)	mql8[c] + dmso[c] <=> h2o[c] + mqn8[c] + dms[c]	( Moth_1388 and Moth_1389 )	Moth_1388 Moth_1389		Energy Metabolism	1	-1000	1000	0	Undetermined
DMSOR2	Dimethyl sulfoxide reductase (Demethylmenaquinol 8)	2dmmql8[c] + dmso[c] <=> 2dmmq8[c] + h2o[c] + dms[c]	( Moth_1388 and Moth_1389 )	Moth_1388 Moth_1389		Energy Metabolism	1	-1000	1000	0	Undetermined
NO3R2	Nitrate reductase (Menaquinol-8)	2 h[c] + no3[c] + mql8[c] <=> no2[c] + 2 h[e] + h2o[c] + mqn8[c]	( ( Moth_0506 ) or ( Moth_1908 and Moth_1909 ) )	Moth_1908 Moth_1909 Moth_0506		Energy Metabolism	1	-1000	1000	0	Undetermined
TMAOR1	Trimethylamine N-oxide reductase (menaquinol 8)	h[c] + mql8[c] + tmao[c] <=> h2o[c] + mqn8[c] + tma[c]	( Moth_1388 and Moth_1389 )	Moth_1388 Moth_1389		Energy Metabolism	1	-1000	1000	0	Undetermined
TMAOR2	Trimethylamine N-oxide reductase (demethylmenaquinol 8)	2dmmql8[c] + h[c] + tmao[c] <=> 2dmmq8[c] + h2o[c] + tma[c]	( Moth_1388 and Moth_1389 )	Moth_1388 Moth_1389		Energy Metabolism	1	-1000	1000	0	Undetermined
MTHFR	5,10-methylenetetrahydrofolate reductase (Ferredoxin) Electron bifurcating	fdxox[c] + h[c] + mlthf[c] + 2 nadh[c] <=> 5mthf[c] + 2 nad[c] + fdxrd[c]	( Moth_1191 and Moth_1192 and Moth_1193 and Moth_1194 and Moth_1195 and Moth_1196 )	Moth_1191 Moth_1192 Moth_1193 Moth_1194 Moth_1195 Moth_1196		Energy Metabolism	1	-1000	1000	0	1.5.1.20
MTRCFSP	5-methyltetrahydrofolate corrinoid iron-sulfur protein methyltransferase	5mthf[c] + cfesp[c] <=> mcfesp[c] + thf[c]	Moth_1197	Moth_1197		Energy Metabolism	1	-1000	1000	0	2.1.1.X
CODH	Carbonmonoxide dehydrogenase (ferredoxin)	co[c] + 2 fdxox[c] + h2o[c] -> co2[c] + 2 fdxrd[c] + 2 h[c]	Moth_1972	Moth_1972		Energy Metabolism	0	0	1000	0	1.2.7.4
CODH_ACS	CODH/Acetyl-CoA synthase complex	coa[c] + 2 h[c] + co2[c] + fdxrd[c] + mcfesp[c] -> h2o[c] + accoa[c] + fdxox[c] + cfesp[c]	( Moth_1198 and Moth_1201 and Moth_1202 and Moth_1203 )	Moth_1198 Moth_1201 Moth_1202 Moth_1203		Energy Metabolism	0	0	1000	0	2.3.1.169
KAS15	beta-ketoacyl-ACP synthase (2)	accoa[c] + h[c] + malACP[c] -> actACP[c] + co2[c] + coa[c]	( Moth_0945 and Moth_0950 )	Moth_0945 Moth_0950		Fatty Acid Biosynthesis	0	0	1000	0	2.3.1.41
3HAD100	(3R)-3-Hydroxybutanoyl-[acyl-carrier-protein] hydro-lyase	3hdeACP[c] <=> 2tdeACP[c] + h2o[c]	Moth_0217	Moth_0217		Fatty Acid Metabolism	1	-1000	1000	0	2.3.1.85
3HAD120	(3R)-3-Hydroxybutanoyl-[acyl-carrier-protein] hydro-lyase	3hddACP[c] <=> 2tddACP[c] + h2o[c]	Moth_0217	Moth_0217		Fatty Acid Metabolism	1	-1000	1000	0	2.3.1.85
3HAD140	(3R)-3-Hydroxypalmitoyl-[acyl-carrier-protein] hydro-lyase	3htdACP[c] <=> h2o[c] + tmrs2eACP[c]	Moth_0217	Moth_0217		Fatty Acid Metabolism	1	-1000	1000	0	2.3.1.85
3HAD160	(3R)-3-Hydroxypalmitoyl-[acyl-carrier-protein] hydro-lyase	3hpaACP[c] <=> h2o[c] + tpalm2eACP[c]	Moth_0217	Moth_0217		Fatty Acid Metabolism	1	-1000	1000	0	2.3.1.85
3HAD60	(3R)-3-Hydroxybutanoyl-[acyl-carrier-protein] hydro-lyase	3hhACP[c] <=> h2o[c] + 2theACP[c]	Moth_0217	Moth_0217		Fatty Acid Metabolism	1	-1000	1000	0	2.3.1.85
3HAD80	(3R)-3-Hydroxybutanoyl-[acyl-carrier-protein] hydro-lyase	3hocACP[c] <=> h2o[c] + 2toceACP[c]	Moth_0217	Moth_0217		Fatty Acid Metabolism	1	-1000	1000	0	2.3.1.85
3OAR100	(3R)-3-Hydroxydecanoyl-[acyl-carrier-protein]:NADP+ oxidoreductase	3hdeACP[c] + nadp[c] <=> nadph[c] + h[c] + 3oxdeACP[c]	( ( Moth_1258 ) or ( Moth_0948 ) )	Moth_1258 Moth_0948		Fatty Acid Metabolism	1	-1000	1000	0	1.1.1.100
3OAR120	(3R)-3-Hydroxydodecanoyl-[acyl-carrier-protein]:NADP+ oxidoreductase	3hddACP[c] + nadp[c] <=> nadph[c] + h[c] + 3oxddACP[c]	( ( Moth_1258 ) or ( Moth_0948 ) )	Moth_1258 Moth_0948		Fatty Acid Metabolism	1	-1000	1000	0	1.1.1.100
3OAR140	(3R)-3-Hydroxytetradecanoyl-[acyl-carrier-protein]:NADP+	3htdACP[c] + nadp[c] <=> nadph[c] + h[c] + 3oxtdACP[c]	( ( Moth_1258 ) or ( Moth_0948 ) )	Moth_1258 Moth_0948		Fatty Acid Metabolism	1	-1000	1000	0	1.1.1.100
3OAR160	(3R)-3-Hydroxypalmitoyl-[acyl-carrier-protein]:NADP+ oxidoreductase	3hpaACP[c] + nadp[c] <=> nadph[c] + 3oxhdACP[c] + h[c]	( ( Moth_1258 ) or ( Moth_0948 ) )	Moth_1258 Moth_0948		Fatty Acid Metabolism	1	-1000	1000	0	1.1.1.100
3OAR60	(3R)-3-Hydroxyhexanoyl-[acyl-carrier-protein]:NADP+ oxidoreductase	3hhACP[c] + nadp[c] <=> nadph[c] + 3oxhACP[c] + h[c]	( ( Moth_1258 ) or ( Moth_0948 ) )	Moth_1258 Moth_0948		Fatty Acid Metabolism	1	-1000	1000	0	1.1.1.100
3OAR80	(3R)-3-Hydroxyoctanoyl-[acyl-carrier-protein]:NADP+ oxidoreductase	3hocACP[c] + nadp[c] <=> nadph[c] + h[c] + 3oxocACP[c]	( ( Moth_1258 ) or ( Moth_0948 ) )	Moth_1258 Moth_0948		Fatty Acid Metabolism	1	-1000	1000	0	1.1.1.100
3OAS100	Octanoyl-[acyl-carrier protein]:malonyl-[acyl-carrier-protein]	octACP[c] + h[c] + malACP[c] -> 3oxdeACP[c] + ACP[c] + co2[c]	( Moth_0945 and Moth_0950 )	Moth_0945 Moth_0950		Fatty Acid Metabolism	0	0	1000	0	2.3.1.41
3OAS120	Decanoyl-[acyl-carrier protein]:malonyl-[acyl-carrier-protein]	h[c] + decACP[c] + malACP[c] -> ACP[c] + 3oxddACP[c] + co2[c]	( Moth_0945 and Moth_0950 )	Moth_0945 Moth_0950		Fatty Acid Metabolism	0	0	1000	0	2.3.1.41
3OAS140	dodecanoyl-[acyl-carrier-protein]:malonyl-[acyl-carrier-protein]	h[c] + ddcaACP[c] + malACP[c] -> 3oxtdACP[c] + ACP[c] + co2[c]	( Moth_0945 and Moth_0950 )	Moth_0945 Moth_0950		Fatty Acid Metabolism	0	0	1000	0	2.3.1.41
3OAS160	Tetradecanoyl-[acyl-carrier protein]:malonyl-[acyl-carrier-protein]	myrsACP[c] + h[c] + malACP[c] -> 3oxhdACP[c] + ACP[c] + co2[c]	( Moth_0945 and Moth_0950 )	Moth_0945 Moth_0950		Fatty Acid Metabolism	0	0	1000	0	2.3.1.41
3OAS60	butyryl-[acyl-carrier protein]:malonyl-[acyl-carrier-protein]	h[c] + malACP[c] + butACP[c] -> 3oxhACP[c] + ACP[c] + co2[c]	( Moth_0945 and Moth_0950 )	Moth_0945 Moth_0950		Fatty Acid Metabolism	0	0	1000	0	2.3.1.41
3OAS80	hexanoyl-[acyl-carrier protein]:malonyl-[acyl-carrier-protein]	h[c] + malACP[c] + hexACP[c] -> 3oxocACP[c] + ACP[c] + co2[c]	( Moth_0945 and Moth_0950 )	Moth_0945 Moth_0950		Fatty Acid Metabolism	0	0	1000	0	2.3.1.41
ACACT3r	Hexanoyl-CoA:acetyl-CoA C-acyltransferase	hxcoa[c] + accoa[c] <=> 3oocoa[c] + coa[c]	Moth_1260	Moth_1260		Fatty Acid Metabolism	1	-1000	1000	0	2.3.1.16
ACACT4r	Octanoyl-CoA:acetyl-CoA C-acyltransferase	occoa[c] + accoa[c] <=> 3odcoa[c] + coa[c]	Moth_1260	Moth_1260		Fatty Acid Metabolism	1	-1000	1000	0	2.3.1.16
ACACT5r	Decanoyl-CoA:acetyl-CoA C-acyltransferase	dccoa[c] + accoa[c] <=> coa[c] + 3oddcoa[c]	Moth_1260	Moth_1260		Fatty Acid Metabolism	1	-1000	1000	0	2.3.1.16
ACACT6r	Lauroyl-CoA:acetyl-CoA C-acyltransferase	accoa[c] + ddcoa[c] <=> 3otdcoa[c] + coa[c]	Moth_1260	Moth_1260		Fatty Acid Metabolism	1	-1000	1000	0	2.3.1.16
ACACT7r	myristoyl-CoA:acetylCoA C-myristoyltransferase	tdcoa[c] + accoa[c] <=> 3ohdcoa[c] + coa[c]	Moth_1260	Moth_1260		Fatty Acid Metabolism	1	-1000	1000	0	2.3.1.16
FACOAL140	fatty-acid--CoA ligase (tetradecanoate)	ttdca[c] + h[c] + atp[c] + coa[c] <=> ppi[c] + amp[c] + tdcoa[c]	( ( Moth_1261 ) or ( Moth_1980 ) or ( Moth_0503 ) )	Moth_1261 Moth_1980 Moth_0503		Fatty Acid Metabolism	1	-1000	1000	0	6.2.1.3
FACOAL140(ISO)	fatty-acid--CoA ligase (Iso-C14:0)	fa1[c] + h[c] + atp[c] + coa[c] -> fa1coa[c] + ppi[c] + amp[c]	( ( Moth_1261 ) or ( Moth_1980 ) or ( Moth_0503 ) )	Moth_1261 Moth_1980 Moth_0503		Fatty Acid Metabolism	0	0	1000	0	6.2.1.3
FACOAL150(anteiso)	fatty-acid--CoA ligase (anteiso-C15:0)	h[c] + fa4[c] + atp[c] + coa[c] -> ppi[c] + amp[c] + fa4coa[c]	( ( Moth_1261 ) or ( Moth_1980 ) or ( Moth_0503 ) )	Moth_1261 Moth_1980 Moth_0503		Fatty Acid Metabolism	0	0	1000	0	6.2.1.3
FACOAL150(ISO)	fatty-acid--CoA ligase (Iso-C15:0)	fa3[c] + h[c] + atp[c] + coa[c] -> fa3coa[c] + ppi[c] + amp[c]	( ( Moth_1261 ) or ( Moth_1980 ) or ( Moth_0503 ) )	Moth_1261 Moth_1980 Moth_0503		Fatty Acid Metabolism	0	0	1000	0	6.2.1.3
FACOAL160	fatty-acid--CoA ligase (hexadecanoate)	h[c] + atp[c] + hdca[c] + coa[c] -> pmtcoa[c] + ppi[c] + amp[c]	( ( Moth_1261 ) or ( Moth_1980 ) or ( Moth_0503 ) )	Moth_1261 Moth_1980 Moth_0503		Fatty Acid Metabolism	0	0	1000	0	6.2.1.3
FACOAL160(ISO)	fatty-acid--CoA ligase (Iso-C16:0)	fa6[c] + h[c] + atp[c] + coa[c] -> fa6coa[c] + ppi[c] + amp[c]	( ( Moth_1261 ) or ( Moth_1980 ) or ( Moth_0503 ) )	Moth_1261 Moth_1980 Moth_0503		Fatty Acid Metabolism	0	0	1000	0	6.2.1.3
FACOAL161	fatty-acid--CoA ligase (hexadecenoate)	hdcea[c] + h[c] + atp[c] + coa[c] <=> ppi[c] + hdcoa[c] + amp[c]	( ( Moth_1261 ) or ( Moth_1980 ) or ( Moth_0503 ) )	Moth_1261 Moth_1980 Moth_0503		Fatty Acid Metabolism	1	-1000	1000	0	6.2.1.3
FACOAL170(ISO)	fatty-acid--CoA ligase (Iso-C17:0)	h[c] + fa11[c] + atp[c] + coa[c] -> fa11coa[c] + ppi[c] + amp[c]	( ( Moth_1261 ) or ( Moth_1980 ) or ( Moth_0503 ) )	Moth_1261 Moth_1980 Moth_0503		Fatty Acid Metabolism	0	0	1000	0	6.2.1.3
FACOAL170(anteiso)	fatty-acid--CoA ligase (anteiso-C17:0)	h[c] + atp[c] + coa[c] + fa12[c] -> ppi[c] + fa12coa[c] + amp[c]	( ( Moth_1261 ) or ( Moth_1980 ) or ( Moth_0503 ) )	Moth_1261 Moth_1980 Moth_0503		Fatty Acid Metabolism	0	0	1000	0	6.2.1.3
FACOAL180	fatty-acid--CoA ligase (octadecanoate)	h[c] + atp[c] + ocdca[c] + coa[c] <=> ppi[c] + stcoa[c] + amp[c]	( ( Moth_1261 ) or ( Moth_1980 ) or ( Moth_0503 ) )	Moth_1261 Moth_1980 Moth_0503		Fatty Acid Metabolism	1	-1000	1000	0	6.2.1.3
FACOAL181	fatty-acid--CoA ligase (octadecenoate)	ocdcea[c] + h[c] + atp[c] + coa[c] <=> odecoa[c] + ppi[c] + amp[c]	( ( Moth_1261 ) or ( Moth_1980 ) or ( Moth_0503 ) )	Moth_1261 Moth_1980 Moth_0503		Fatty Acid Metabolism	1	-1000	1000	0	6.2.1.3
G3PAT180	glycerol-3-phosphate acyltransferase (C18:0)	ocdcaACP[c] + glyc3p[c] -> ACP[c] + 1odecg3p[c]	( Moth_1321 and Moth_0944 )	Moth_1321 Moth_0944		Fatty Acid Metabolism	0	0	1000	0	2.3.1.15
HODHL8	(3R)-3-Hydroxybutanoyl-[acyl-carrier-protein] hydro-lyase	3hbACP[c] <=> 2beACP[c] + h2o[c]	Moth_0217	Moth_0217		Fatty Acid Metabolism	1	-1000	1000	0	4.2.1.58
HODR8	3-Hydroxyoctodecanoyl-ACP:NADP+ oxidoreductase	nadph[c] + h[c] + 3oodacp[c] <=> 3hodacp[c] + nadp[c]	( ( Moth_1258 ) or ( Moth_0948 ) )	Moth_1258 Moth_0948		Fatty Acid Metabolism	1	-1000	1000	0	1.1.1.0
KAS12	b-ketoacyl synthetase (Anteiso-C17:0)	2mbcoa[c] + 17 h[c] + 6 malcoa[c] + 12 nadph[c] -> 6 co2[c] + 7 coa[c] + fa12[c] + 5 h2o[c] + 12 nadp[c]	( Moth_0945 and Moth_0950 )	Moth_0945 Moth_0950		Fatty Acid Metabolism	0	0	1000	0	2.3.1.41
KAS13	b-ketoacyl synthetase (n-C18:0)	accoa[c] + 23 h[c] + 8 malcoa[c] + 16 nadph[c] -> 8 co2[c] + 9 coa[c] + 7 h2o[c] + 16 nadp[c] + ocdca[c]	( Moth_0945 and Moth_0950 )	Moth_0945 Moth_0950		Fatty Acid Metabolism	0	0	1000	0	2.3.1.41
KAS14	beta-ketoacyl-ACP synthase (2)	h[c] + malACP[c] + acACP[c] -> actACP[c] + ACP[c] + co2[c]	( Moth_0945 and Moth_0950 )	Moth_0945 Moth_0950		Fatty Acid Metabolism	0	0	1000	0	2.3.1.41
KAS17	b-ketoacyl synthetase (n-C18:1)	accoa[c] + 22 h[c] + 8 malcoa[c] + 15 nadph[c] -> 8 co2[c] + 9 coa[c] + 7 h2o[c] + 15 nadp[c] + ocdcea[c]	( Moth_0945 and Moth_0950 )	Moth_0945 Moth_0950		Fatty Acid Metabolism	0	0	1000	0	2.3.1.41
KAS2	b-ketoacyl synthetase (n-C14:0)	accoa[c] + 17 h[c] + 6 malcoa[c] + 12 nadph[c] -> 6 co2[c] + 7 coa[c] + 5 h2o[c] + 12 nadp[c] + ttdca[c]	( Moth_0945 and Moth_0950 )	Moth_0945 Moth_0950		Fatty Acid Metabolism	0	0	1000	0	2.3.1.41
KAS3	b-ketoacyl synthetase (Iso-C15:0)	14 h[c] + ivcoa[c] + 5 malcoa[c] + 10 nadph[c] -> 5 co2[c] + 6 coa[c] + fa3[c] + 4 h2o[c] + 10 nadp[c]	( Moth_0945 and Moth_0950 )	Moth_0945 Moth_0950		Fatty Acid Metabolism	0	0	1000	0	2.3.1.41
KAS4	b-ketoacyl synthetase (Anteiso-C15:0)	2mbcoa[c] + 14 h[c] + 5 malcoa[c] + 10 nadph[c] -> 5 co2[c] + 6 coa[c] + fa4[c] + 4 h2o[c] + 10 nadp[c]	( Moth_0945 and Moth_0950 )	Moth_0945 Moth_0950		Fatty Acid Metabolism	0	0	1000	0	2.3.1.41
KAS7	b-ketoacyl synthetase (n-C16:1)	accoa[c] + 19 h[c] + 7 malcoa[c] + 13 nadph[c] -> 7 co2[c] + 8 coa[c] + 6 h2o[c] + hdcea[c] + 13 nadp[c]	( Moth_0945 and Moth_0950 )	Moth_0945 Moth_0950		Fatty Acid Metabolism	0	0	1000	0	2.3.1.41
KAS8	b-ketoacyl synthetase (palmitate, n-C16:0)	accoa[c] + 20 h[c] + 7 malcoa[c] + 14 nadph[c] -> 7 co2[c] + 8 coa[c] + 6 h2o[c] + hdca[c] + 14 nadp[c]	( Moth_0945 and Moth_0950 )	Moth_0945 Moth_0950		Fatty Acid Metabolism	0	0	1000	0	2.3.1.41
MACCOAT	Propanoyl-CoA:acetyl-CoA C-acyltransferase	ppcoa[c] + accoa[c] <=> coa[c] + 2maacoa[c]	Moth_1260	Moth_1260		Fatty Acid Metabolism	1	-1000	1000	0	2.3.1.16
OIVD1	2-oxoisovalerate dehydrogenase (acylating; 4-methyl-2-oxopentaoate)	4mop[c] + coa[c] + nad[c] <=> co2[c] + ivcoa[c] + nadh[c]	NON-GENE ASSOCIATED	NON-GENE ASSOCIATED		Fatty Acid Metabolism	1	-1000	1000	0	1.2.1.25
OIVD2	2-oxoisovalerate dehydrogenase (acylating; 3-methyl-2-oxobutanoate)	3mob[c] + coa[c] + nad[c] -> co2[c] + ibcoa[c] + nadh[c]	NON-GENE ASSOCIATED	NON-GENE ASSOCIATED		Fatty Acid Metabolism	0	0	1000	0	1.2.1.25
OIVD3	2-oxoisovalerate dehydrogenase (acylating; 3-methyl-2-oxopentanoate)	3mop[c] + coa[c] + nad[c] -> 2mbcoa[c] + co2[c] + nadh[c]	NON-GENE ASSOCIATED	NON-GENE ASSOCIATED		Fatty Acid Metabolism	0	0	1000	0	1.2.1.25
PFOR	Pyruvate ferredoxin oxidoreductase	2 fdxrd[c] + 2 h[c] + co2[c] + accoa[c] <=> 2 fdxox[c] + pyr[c] + coa[c]	( ( Moth_1591 and Moth_1592 and Moth_1593 ) or ( Moth_1921 and Moth_1922 and Moth_1923 and Moth_1924 ) or ( Moth_0064 ) )	Moth_1591 Moth_1592 Moth_1593 Moth_1921 Moth_1922 Moth_1923 Moth_1924 Moth_0064		Glycolysis/Gluconeogenesis	1	-1000	1000	0	1.2.7.1
G6PI	alpha-D-Glucose 6-phosphate ketol-isomerase	g6p[c] <=> g6p-B[c]	Moth_0508	Moth_0508		Glycolysis/Gluconeogenesis	1	-1000	1000	0	5.1.3.15
HEX1	hexokinase (D-glucose:ATP)	atp[c] + glc-D[c] <=> adp[c] + g6p[c] + h[c]	Moth_0832	Moth_0832		Glycolysis/Gluconeogenesis	1	-1000	1000	0	2.7.1.2
PGMT	phosphoglucomutase	g1p[c] <=> g6p[c]	Moth_2246	Moth_2246		Glycolysis/Gluconeogenesis	1	-1000	1000	0	5.4.2.2
PGI	glucose-6-phosphate isomerase	g6p[c] <=> f6p[c]	( ( Moth_0610 ) or ( Moth_0508 ) )	Moth_0508 Moth_0610		Glycolysis/Gluconeogenesis	1	-1000	1000	0	5.3.1.9
FBP	fructose-bisphosphatase	fdp[c] + h2o[c] -> pi[c] + h[c] + f6p[c]	Moth_2266	Moth_2266		Glycolysis/Gluconeogenesis	0	0	1000	0	3.1.3.11
PFK_1	Phosphofructokinase	atp[c] + f6p[c] -> adp[c] + fdp[c] + h[c]	( ( Moth_1234) or ( Moth_1738 ) or ( Moth_1868 ) )	Moth_1234 Moth_1738 Moth_1868		Glycolysis/Gluconeogenesis	0	0	1000	0	2.7.1.11
PFK_2	Phosphofructokinase (tag6p)	atp[c] + tag6p-D[c] -> adp[c] + h[c] + tagdp-D[c]	( ( Moth_0012 ) or ( Moth_0611 ) or ( Moth_1738 ) or ( Moth_1868 ) )	Moth_0012 Moth_1738 Moth_1868 Moth_0611		Glycolysis/Gluconeogenesis	0	0	1000	0	2.7.1.11
PFK_3	Phosphofructokinase (s7p)	atp[c] + s7p[c] -> adp[c] + h[c] + s17bp[c]	( ( Moth_1738 ) or ( Moth_1868 ) )	Moth_1738 Moth_1868		Glycolysis/Gluconeogenesis	0	0	1000	0	2.7.1.11
FBA	fructose-bisphosphate aldolase	fdp[c] <=> dhap[c] + g3p[c]	( ( Moth_0474 ) or ( Moth_2404 ) )	Moth_0474 Moth_2404		Glycolysis/Gluconeogenesis	1	-1000	1000	0	4.1.2.13
TPI	triose-phosphate isomerase	g3p[c] <=> dhap[c]	Moth_0264	Moth_0264		Glycolysis/Gluconeogenesis	1	-1000	1000	0	5.3.1.1
GAPD	glyceraldehyde-3-phosphate dehydrogenase	pi[c] + g3p[c] + nad[c] <=> nadh[c] + 13dpg[c]	Moth_0262	Moth_0262		Glycolysis/Gluconeogenesis	1	-1000	1000	0	1.2.1.12
PGK	phosphoglycerate kinase	3pg[c] + h[c] + atp[c] <=> 13dpg[c] + adp[c]	Moth_0263	Moth_0263		Glycolysis/Gluconeogenesis	1	-1000	1000	0	2.7.2.3
PGM	phosphoglycerate mutase	2pg[c] <=> 3pg[c]	Moth_0265	Moth_0265		Glycolysis/Gluconeogenesis	1	-1000	1000	0	5.4.2.12
ENO	enolase	2pg[c] <=> h2o[c] + pep[c]	Moth_0266	Moth_0266		Glycolysis/Gluconeogenesis	1	-1000	1000	0	4.2.1.11
PYK	pyruvate kinase	pep[c] + adp[c] -> pyr[c] + atp[c]	Moth_1867	Moth_1867		Glycolysis/Gluconeogenesis	0	0	1000	0	2.7.1.40
PPCK	phosphoenolpyruvate carboxykinase	atp[c] + oaa[c] -> adp[c] + co2[c] + pep[c]	( ( Moth_1893 ) or ( Moth_0633 ) )	Moth_1893 Moth_0633		Glycolysis/Gluconeogenesis	0	0	1000	0	4.1.1.49
PPDK	Pyruvate,phosphate dikinase.	atp[c] + pi[c] + pyr[c] -> amp[c] + h[c] + pep[c] + ppi[c]	Moth_0607	Moth_0607		Glycolysis/Gluconeogenesis	0	0	1000	0	2.7.9.1
LDH_L	L-lactate dehydrogenase	lac-L[c] + nad[c] <=> h[c] + pyr[c] + nadh[c]	Moth_1826	Moth_1826		Glycolysis/Gluconeogenesis	1	-1000	1000	0	1.1.1.27
GLYK	glycerol kinase	atp[c] + glyc[c] -> adp[c] + glyc3p[c] + h[c]	Moth_2025	Moth_2025		Glycolysis/Gluconeogenesis	0	0	1000	0	2.7.1.30
ACACT1r	Acetyl-CoA:acetyl-CoA C-acetyltransferase	2 accoa[c] <=> coa[c] + aacoa[c]	Moth_1260	Moth_1260		Lipid Metabolism	1	-1000	1000	0	2.3.1.9
ACACT2r	Acetyl-CoA:acetyl-CoA C-acetyltransferase	btcoa[c] + accoa[c] <=> 3ohcoa[c] + coa[c]	Moth_1260	Moth_1260		Lipid Metabolism	1	-1000	1000	0	2.3.1.9
ACCOAC	acetyl-CoA carboxylase	hco3[c] + atp[c] + accoa[c] -> pi[c] + h[c] + adp[c] + malcoa[c]	Moth_1155	Moth_1155		Lipid Metabolism	0	0	1000	0	6.4.1.2
ACOATA	acetyl-CoA:[acyl-carrier-protein] S-acetyltransferase	ACP[c] + accoa[c] <=> acACP[c] + coa[c]	( Moth_0945 and Moth_0950 )	Moth_0945 Moth_0950		Lipid Metabolism	1	-1000	1000	0	2.3.1.38
ACPS1	CoA:apo-[acyl-carrier-protein] pantetheinephosphotransferase	apoACP[c] + coa[c] <=> pap[c] + ACP[c]	Moth_2169	Moth_2169		Lipid Metabolism	1	-1000	1000	0	2.7.8.7
DASYN120	CDP-diacylglycerol synthetase (n-C12:0)	ctp[c] + pa120[c] <=> ppi[c] + cdpdddecg[c]	Moth_1039	Moth_1039		Lipid Metabolism	1	-1000	1000	0	2.7.7.41
DASYN140	CDP-diacylglycerol synthetase (n-C14:0)	ctp[c] + pa140[c] <=> ppi[c] + cdpdtdecg[c]	Moth_1039	Moth_1039		Lipid Metabolism	1	-1000	1000	0	2.7.7.41
DASYN141	CDP-diacylglycerol synthetase (n-C14:1)	pa141[c] + ctp[c] <=> ppi[c] + cdpdtdec7eg[c]	Moth_1039	Moth_1039		Lipid Metabolism	1	-1000	1000	0	2.7.7.41
DASYN160	CDP-diacylglycerol synthetase (n-C16:0)	pa160[c] + ctp[c] <=> ppi[c] + cdpdhdecg[c]	Moth_1039	Moth_1039		Lipid Metabolism	1	-1000	1000	0	2.7.7.41
DASYN161	CDP-diacylglycerol synthetase (n-C16:1)	ctp[c] + pa161[c] <=> cdpdhdec9eg[c] + ppi[c]	Moth_1039	Moth_1039		Lipid Metabolism	1	-1000	1000	0	2.7.7.41
DASYN180	CDP-diacylglycerol synthetase (n-C18:0)	pa180[c] + ctp[c] <=> cdpdodecg[c] + ppi[c]	Moth_1039	Moth_1039		Lipid Metabolism	1	-1000	1000	0	2.7.7.41
DASYN181	CDP-diacylglycerol synthetase (n-C18:1)	pa181[c] + ctp[c] <=> ppi[c] + cdpdodec11eg[c]	Moth_1039	Moth_1039		Lipid Metabolism	1	-1000	1000	0	2.7.7.41
G3PAT120	glycerol-3-phosphate acyltransferase (C12:0)	ddcaACP[c] + glyc3p[c] -> 1ddecg3p[c] + ACP[c]	( Moth_1321 and Moth_0944 )	Moth_1321 Moth_0944		Lipid Metabolism	0	0	1000	0	2.3.1.15
G3PAT140	glycerol-3-phosphate acyltransferase (C14:0)	myrsACP[c] + glyc3p[c] -> 1tdecg3p[c] + ACP[c]	( Moth_1321 and Moth_0944 )	Moth_1321 Moth_0944		Lipid Metabolism	0	0	1000	0	2.3.1.15
G3PAT141	glycerol-3-phosphate acyltransferase (C14:1)	tdeACP[c] + glyc3p[c] -> 1tdec7eg3p[c] + ACP[c]	( Moth_1321 and Moth_0944 )	Moth_1321 Moth_0944		Lipid Metabolism	0	0	1000	0	2.3.1.15
G3PAT160	glycerol-3-phosphate acyltransferase (C16:0)	palmACP[c] + glyc3p[c] -> 1hdecg3p[c] + ACP[c]	( Moth_1321 and Moth_0944 )	Moth_1321 Moth_0944		Lipid Metabolism	0	0	1000	0	2.3.1.15
G3PAT161	glycerol-3-phosphate acyltransferase (C16:1)	glyc3p[c] + hdeACP[c] -> 1hdec9eg3p[c] + ACP[c]	( Moth_1321 and Moth_0944 )	Moth_1321 Moth_0944		Lipid Metabolism	0	0	1000	0	2.3.1.15
G3PAT181	glycerol-3-phosphate acyltransferase (C18:1)	octeACP[c] + glyc3p[c] -> ACP[c] + 1odec11eg3p[c]	( Moth_1321 and Moth_0944 )	Moth_1321 Moth_0944		Lipid Metabolism	0	0	1000	0	2.3.1.15
MCOATA	malonyl-ACP:[acyl-carrier-protein] transferase	ACP[c] + malcoa[c] <=> malACP[c] + coa[c]	Moth_0947	Moth_0947		Lipid Metabolism	1	-1000	1000	0	2.3.1.0
PGSA120	Phosphatidylglycerol synthase (n-C12:0)	glyc3p[c] + cdpdddecg[c] <=> pgp120[c] + cmp[c]	Moth_1075	Moth_1075		Lipid Metabolism	1	-1000	1000	0	2.7.8.5
PGSA140	Phosphatidylglycerol synthase (n-C14:0)	cdpdtdecg[c] + glyc3p[c] <=> pgp140[c] + cmp[c]	Moth_1075	Moth_1075		Lipid Metabolism	1	-1000	1000	0	2.7.8.5
PGSA141	Phosphatidylglycerol synthase (n-C14:1)	glyc3p[c] + cdpdtdec7eg[c] <=> pgp141[c] + cmp[c]	Moth_1075	Moth_1075		Lipid Metabolism	1	-1000	1000	0	2.7.8.5
PGSA160	Phosphatidylglycerol synthase (n-C16:0)	glyc3p[c] + cdpdhdecg[c] <=> pgp160[c] + cmp[c]	Moth_1075	Moth_1075		Lipid Metabolism	1	-1000	1000	0	2.7.8.5
PGSA161	Phosphatidylglycerol synthase (n-C16:1)	cdpdhdec9eg[c] + glyc3p[c] <=> pgp161[c] + cmp[c]	Moth_1075	Moth_1075		Lipid Metabolism	1	-1000	1000	0	2.7.8.5
PGSA180	Phosphatidylglycerol synthase (n-C18:0)	cdpdodecg[c] + glyc3p[c] <=> pgp180[c] + cmp[c]	Moth_1075	Moth_1075		Lipid Metabolism	1	-1000	1000	0	2.7.8.5
PGSA181	Phosphatidylglycerol synthase (n-C18:1)	cdpdodec11eg[c] + glyc3p[c] <=> pgp181[c] + cmp[c]	Moth_1075	Moth_1075		Lipid Metabolism	1	-1000	1000	0	2.7.8.5
NO2t2r	nitrite transport in via proton symport, reversible	h[e] + no2[e] <=> h[c] + no2[c]	Moth_2194	Moth_2194		Nitrate Reduction Pathway	1	-1000	1000	0	1
NO3t2	nitrate transport in via proton symport	h[e] + no3[e] -> h[c] + no3[c]	Moth_2194	Moth_2194		Nitrate Reduction Pathway	0	0	1000	0	1
ADD	Adenine aminohydrolase	ade[c] + h[c] + h2o[c] -> hxan[c] + nh4[c]	Moth_0463	Moth_0463		Nucleotide Metabolism	0	0	1000	0	3.5.4.2
ADK1	ATP:AMP phosphotransferase	atp[c] + amp[c] <=> 2 adp[c]	Moth_2439	Moth_2439		Nucleotide Metabolism	1	-1000	1000	0	2.7.4.3
ADK2	adenylate kinase (Inorganic triphosphate)	pppi[c] + h[c] + amp[c] <=> ppi[c] + adp[c]	Moth_2439	Moth_2439		Nucleotide Metabolism	1	-1000	1000	0	2.7.4.3
ADNCYC	ATP pyrophosphate-lyase (cyclizing)	atp[c] -> ppi[c] + camp[c]	Moth_0907	Moth_0907		Nucleotide Metabolism	0	0	1000	0	4.6.1.1
ADPRDP	ADPribose ribophosphohydrolase	adprib[c] + h2o[c] -> r5p[c] + amp[c]	( ( Moth_1504 ) or ( Moth_0598 ) )	Moth_1504 Moth_0598		Nucleotide Metabolism	0	0	1000	0	3.6.1.13
ADSL1	N6-(1,2-Dicarboxyethyl)AMP AMP-lyase	dcamp[c] <=> fum[c] + amp[c]	Moth_2052	Moth_2052		Nucleotide Metabolism	1	-1000	1000	0	4.3.2.2
ADSL2	1-(5'-Phosphoribosyl)-5-amino-4-(N-succinocarboxamide)-imidazole	25aics[c] <=> aicar[c] + fum[c]	Moth_2052	Moth_2052		Nucleotide Metabolism	1	-1000	1000	0	4.3.2.2
ADSS	IMP:L-aspartate ligase (GDP-forming)	asp-L[c] + imp[c] + gtp[c] -> pi[c] + 2 h[c] + dcamp[c] + gdp[c]	Moth_2309	Moth_2309		Nucleotide Metabolism	0	0	1000	0	6.3.4.4
AICART	10-Formyltetrahydrofolate:5'-phosphoribosyl-5-amino-4-	aicar[c] + 10fthf[c] <=> thf[c] + fprica[c]	Moth_2044	Moth_2044		Nucleotide Metabolism	1	-1000	1000	0	2.1.2.3
AIRCr	phosphoribosylaminoimidazole carboxylase	air[c] + co2[c] <=> 5aizc[c] + h[c]	Moth_2053	Moth_2053		Nucleotide Metabolism	1	-1000	1000	0	4.1.1.21
ASPCT	Carbamoyl-phosphate:L-aspartate carbamoyltransferase	asp-L[c] + cbp[c] -> pi[c] + cbasp[c] + 2 h[c]	Moth_0879	Moth_0879		Nucleotide Metabolism	0	0	1000	0	2.1.3.2
CSND	Cytosine aminohydrolase	h[c] + h2o[c] + csn[c] -> nh4[c] + ura[c]	Moth_0460	Moth_0460		Nucleotide Metabolism	0	0	1000	0	3.5.4.1
CYTD	Cytidine aminohydrolase	h[c] + h2o[c] + cytd[c] -> nh4[c] + uri[c]	Moth_0599	Moth_0599		Nucleotide Metabolism	0	0	1000	0	3.5.4.5
CYTK1	ATP:CMP phosphotransferase	atp[c] + cmp[c] <=> cdp[c] + adp[c]	Moth_1331	Moth_1331		Nucleotide Metabolism	1	-1000	1000	0	2.7.4.14
CYTK2	ATP:CMP phosphotransferase	dcmp[c] + atp[c] <=> dcdp[c] + adp[c]	Moth_1331	Moth_1331		Nucleotide Metabolism	1	-1000	1000	0	2.7.4.14
DADK	ATP:AMP phosphotransferase	atp[c] + damp[c] <=> dadp[c] + adp[c]	Moth_2439	Moth_2439		Nucleotide Metabolism	1	-1000	1000	0	2.7.4.3
DCMPDA3ir	dCMP aminohydrolase	dcmp[c] + h[c] + h2o[c] -> dump[c] + nh4[c]	Moth_2389	Moth_2389		Nucleotide Metabolism	0	0	1000	0	3.5.4.12
DCYTD	Deoxycytidine aminohydrolase	h[c] + h2o[c] + dcyt[c] -> nh4[c] + duri[c]	Moth_0599	Moth_0599		Nucleotide Metabolism	0	0	1000	0	3.5.4.5
DHORD5	dihydroorotic acid (menaquinone-8)	dhor-S[c] + mqn8[c] -> orot[c] + mql8[c]	( Moth_2127 and Moth_2128 )	Moth_2127 Moth_2128		Nucleotide Metabolism	0	0	1000	0	1.3.3.1
DHORTS	(S)-Dihydroorotate amidohydrolase	dhor-S[c] + h2o[c] <=> cbasp[c] + h[c]	Moth_0880	Moth_0880		Nucleotide Metabolism	1	-1000	1000	0	3.5.2.3
DTMPK	ATP:dTMP phosphotransferase	dtmp[c] + atp[c] <=> dtdp[c] + adp[c]	Moth_0042	Moth_0042		Nucleotide Metabolism	1	-1000	1000	0	2.7.4.9
DURIPP	deoxyuridine:orthophosphate 2-deoxy-D-ribosyltransferase	pi[c] + h[c] + duri[c] <=> ura[c] + 2dr1p[c]	Moth_2275	Moth_2275		Nucleotide Metabolism	1	-1000	1000	0	2.4.2.1
DUTPDP	dUTP nucleotidohydrolase	dutp[c] + h2o[c] -> dump[c] + ppi[c]	Moth_0084	Moth_0084		Nucleotide Metabolism	0	0	1000	0	3.6.1.19
G1PTT	dTTP:alpha-D-glucose-1-phosphate thymidylyltransferase	dttp[c] + g1p[c] <=> dtdpglu[c] + ppi[c]	Moth_0166	Moth_0166		Nucleotide Metabolism	0	0	0	0	2.7.7.24
GARFT	10-Formyltetrahydrofolate:5'-phosphoribosylglycinamide	gar[c] + 10fthf[c] <=> thf[c] + fgam[c] + h[c]	Moth_2045	Moth_2045		Nucleotide Metabolism	1	-1000	1000	0	2.1.2.2
GLUPRT	5-Phosphoribosylamine:pyrophosphate phosphoribosyltransferase	gln-L[c] + prpp[c] + h2o[c] -> pram[c] + ppi[c] + glu-L[c]	Moth_2047	Moth_2047		Nucleotide Metabolism	0	0	1000	0	2.4.2.14
GMPS2	Xanthosine-5'-phosphate:L-glutamine amido-ligase (AMP-forming)	gln-L[c] + xmp[c] + h2o[c] + atp[c] -> gmp[c] + h[c] + ppi[c] + glu-L[c] + amp[c]	Moth_2105	Moth_2105		Nucleotide Metabolism	0	0	1000	0	6.3.5.2
GUAPRT	GMP:pyrophosphate phosphoribosyltransferase	gua[c] + prpp[c] -> gmp[c] + ppi[c]	Moth_2106	Moth_2106		Nucleotide Metabolism	0	0	1000	0	2.4.2.7
HXAND	Xanthine:NAD+ oxidoreductase	hxan[c] + h2o[c] + nad[c] <=> h[c] + nadh[c] + xan[c]	( ( Moth_1225 and Moth_1226 ) or ( Moth_1958 and Moth_1959 and Moth_1960 and Moth_1961 ) or ( Moth_1999 ) or ( Moth_1956 ) )	Moth_1225 Moth_1226 Moth_1956 Moth_1958 Moth_1959 Moth_1960 Moth_1961 Moth_1999		Nucleotide Metabolism	1	-1000	1000	0	1.17.1.4
HXPRT	IMP:pyrophosphate phosphoribosyltransferase	hxan[c] + prpp[c] -> ppi[c] + imp[c]	Moth_2106	Moth_2106		Nucleotide Metabolism	0	0	1000	0	2.4.2.8
IMPC	IMP 1,2-hydrolase (decyclizing)	h2o[c] + imp[c] <=> fprica[c]	Moth_2044	Moth_2044		Nucleotide Metabolism	1	-1000	1000	0	3.5.4.10
IMPD	IMP:NAD+ oxidoreductase	h2o[c] + imp[c] + nad[c] <=> h[c] + xmp[c] + nadh[c]	Moth_1108	Moth_1108		Nucleotide Metabolism	1	-1000	1000	0	1.1.1.205
ITPASE	2'-Deoxyinosine-5'-triphosphate pyrophosphohydrolase	h2o[c] + ditp[c] -> dimp[c] + ppi[c]	Moth_0084	Moth_0084		Nucleotide Metabolism	0	0	1000	0	3.6.1.19
MCSNAH1r	5-Methylcytosine aminohydrolase	h[c] + h2o[c] + 5mcsn[c] -> nh4[c] + thym[c]	Moth_0460	Moth_0460		Nucleotide Metabolism	0	0	1000	0	3.5.4.1
MTAP	5'-Methylthioadenosine:orthophosphate	pi[c] + h[c] + 5mta[c] <=> ade[c] + 5mdr1p[c]	Moth_0705	Moth_0705		Nucleotide Metabolism	1	-1000	1000	0	2.4.2.28
NCTPPRT	Nicotinate D-ribonucleotide:pyrophosphate phosphoribosyltransferase	ppi[c] + nicrnt[c] <=> prpp[c] + h[c] + nac[c]	Moth_1836	Moth_1836		Nucleotide Metabolism	1	-1000	1000	0	2.4.2.11
NDPK1	ATP:nucleoside-diphosphate phosphatransferase	atp[c] + gdp[c] <=> adp[c] + gtp[c]	Moth_0106	Moth_0106		Nucleotide Metabolism	1	-1000	1000	0	2.7.4.6
NDPK2	ATP:nucleoside-diphosphate phosphatransferase	udp[c] + atp[c] <=> adp[c] + utp[c]	Moth_0106	Moth_0106		Nucleotide Metabolism	1	-1000	1000	0	2.7.4.6
NDPK3	ATP:nucleoside-diphosphate phosphatransferase	cdp[c] + atp[c] <=> ctp[c] + adp[c]	Moth_0106	Moth_0106		Nucleotide Metabolism	1	-1000	1000	0	2.7.4.6
NDPK4	ATP:nucleoside-diphosphate phosphatransferase	dtdp[c] + atp[c] <=> dttp[c] + adp[c]	Moth_0106	Moth_0106		Nucleotide Metabolism	1	-1000	1000	0	2.7.4.6
NDPK5	ATP:nucleoside-diphosphate phosphatransferase	atp[c] + dgdp[c] <=> adp[c] + dgtp[c]	Moth_0106	Moth_0106		Nucleotide Metabolism	1	-1000	1000	0	2.7.4.6
NDPK6	ATP:nucleoside-diphosphate phosphatransferase	atp[c] + dudp[c] <=> dutp[c] + adp[c]	Moth_0106	Moth_0106		Nucleotide Metabolism	1	-1000	1000	0	2.7.4.6
NDPK7	ATP:nucleoside-diphosphate phosphatransferase	dcdp[c] + atp[c] <=> adp[c] + dctp[c]	Moth_0106	Moth_0106		Nucleotide Metabolism	1	-1000	1000	0	2.7.4.6
NDPK8	ATP:nucleoside-diphosphate phosphatransferase	dadp[c] + atp[c] <=> adp[c] + datp[c]	Moth_0106	Moth_0106		Nucleotide Metabolism	1	-1000	1000	0	2.7.4.6
NDPK9	ATP:nucleoside-diphosphate phosphatransferase	atp[c] + idp[c] <=> itp[c] + adp[c]	Moth_0106	Moth_0106		Nucleotide Metabolism	1	-1000	1000	0	2.7.4.6
NTPP1	2'-Deoxyguanosine 5'-triphosphate pyrophosphohydrolase	h2o[c] + dgtp[c] -> dgmp[c] + ppi[c]	Moth_0084	Moth_0084		Nucleotide Metabolism	0	0	1000	0	3.6.1.19
NTPP2	Guanosine 5'-triphosphate pyrophosphohydrolase	h2o[c] + gtp[c] -> gmp[c] + ppi[c]	Moth_0084	Moth_0084		Nucleotide Metabolism	0	0	1000	0	3.6.1.8
NTPP8	Uridine triphosphate pyrophosphohydrolase	h2o[c] + utp[c] -> ump[c] + ppi[c]	Moth_0084	Moth_0084		Nucleotide Metabolism	0	0	1000	0	3.6.1.8
NTPP9	Inosine 5'-triphosphate pyrophosphohydrolase	h2o[c] + itp[c] -> ppi[c] + imp[c]	Moth_0084	Moth_0084		Nucleotide Metabolism	0	0	1000	0	3.6.1.8
NTPTP1	dGTP triphosphohydrolase	h2o[c] + dgtp[c] -> pppi[c] + h[c] + dgsn[c]	Moth_0622	Moth_0622		Nucleotide Metabolism	0	0	1000	0	3.1.5.1
OMPDC	Orotidine-5'-phosphate carboxy-lyase	h[c] + orot5p[c] -> ump[c] + co2[c]	Moth_0883	Moth_0883		Nucleotide Metabolism	0	0	1000	0	4.1.1.23
ORPT	Orotidine-5'-phosphate:pyrophosphate phosphoribosyltransferase	orot[c] + prpp[c] -> ppi[c] + orot5p[c]	Moth_2126	Moth_2126		Nucleotide Metabolism	0	0	1000	0	2.4.2.10
PRAGS	5-Phospho-D-ribosylamine:glycine ligase (ADP-forming)	pram[c] + gly[c] + atp[c] -> pi[c] + h[c] + gar[c] + adp[c]	Moth_2043	Moth_2043		Nucleotide Metabolism	0	0	1000	0	6.3.4.13
PRAIS	2-(Formamido)-N1-(5-phosphoribosyl)acetamidine cyclo-ligase	fpram[c] + atp[c] <=> pi[c] + air[c] + h[c] + adp[c]	Moth_2046	Moth_2046		Nucleotide Metabolism	1	-1000	1000	0	6.3.3.1
PRASCS	1-(5-Phosphoribosyl)-5-amino-4-carboxyimidazole:L-aspartate ligase	asp-L[c] + 5aizc[c] + atp[c] -> pi[c] + 2 h[c] + adp[c] + 25aics[c]	Moth_2051	Moth_2051		Nucleotide Metabolism	0	0	1000	0	6.3.2.6
PRFGS	phosphoribosylformylglycinamidine synthase	gln-L[c] + fgam[c] + h2o[c] + atp[c] -> pi[c] + fpram[c] + h[c] + adp[c] + glu-L[c]	( Moth_2048 and Moth_2049 and Moth_2050 )	Moth_2048 Moth_2049 Moth_2050		Nucleotide Metabolism	0	0	1000	0	6.3.5.3
PRPPS	phosphoribosylpyrophosphate synthetase	atp[c] + r5p[c] <=> prpp[c] + amp[c]	Moth_0076	Moth_0076		Nucleotide Metabolism	1	-1000	1000	0	2.7.6.1
PYNP1	Cytidine:orthophosphate alpha-D-ribosyltransferase	pi[c] + h[c] + cytd[c] <=> r1p[c] + csn[c]	Moth_2275	Moth_2275		Nucleotide Metabolism	1	-1000	1000	0	2.4.2.2
PYNP2r	Uridine:orthophosphate ribosyltransferase	pi[c] + h[c] + uri[c] <=> ura[c] + r1p[c]	Moth_2275	Moth_2275		Nucleotide Metabolism	1	-1000	1000	0	2.4.2.3
RNTR1	Ribonucleotide reductase: ATP	trdrd[c] + atp[c] -> trdox[c] + h2o[c] + datp[c]	Moth_1449	Moth_1449		Nucleotide Metabolism	0	0	1000	0	1.17.4.2
RNTR2	Ribonucleotide reductase: GTP	trdrd[c] + gtp[c] -> trdox[c] + h2o[c] + dgtp[c]	Moth_1449	Moth_1449		Nucleotide Metabolism	0	0	1000	0	1.17.4.2
RNTR3	Ribonucleotide reductase: CTP	trdrd[c] + ctp[c] -> trdox[c] + h2o[c] + dctp[c]	Moth_1449	Moth_1449		Nucleotide Metabolism	0	0	1000	0	1.17.4.2
RNTR4	Ribonucleotide reductase: UTP	trdrd[c] + utp[c] -> dutp[c] + trdox[c] + h2o[c]	Moth_1449	Moth_1449		Nucleotide Metabolism	0	0	1000	0	1.17.4.2
TMDS	5,10-Methylenetetrahydrofolate:dUMP C-methyltransferase	dump[c] + mlthf[c] -> dtmp[c] + dhf[c]	Moth_2482	Moth_2482		Nucleotide Metabolism	0	0	1000	0	2.1.1.45
UPPRT	UMP:pyrophosphate phosphoribosyltransferase	prpp[c] + ura[c] -> ump[c] + ppi[c]	Moth_0878	Moth_0878		Nucleotide Metabolism	0	0	1000	0	2.4.2.9
URIDK1	ATP:nucleoside-phosphate phosphotransferase	ump[c] + atp[c] <=> udp[c] + adp[c]	Moth_1034	Moth_1034		Nucleotide Metabolism	1	-1000	1000	0	2.7.4.4
URIDK2r	ATP:dTMP phosphotransferase	dump[c] + atp[c] <=> adp[c] + dudp[c]	Moth_1034	Moth_1034		Nucleotide Metabolism	1	-1000	1000	0	2.7.4.4
XAND	xanthine:NAD+ oxidoreductase	h2o[c] + xan[c] + nad[c] <=> h[c] + urate[c] + nadh[c]	Moth_1999	Moth_1999		Nucleotide Metabolism	1	-1000	1000	0	1.17.1.4
XPPT	XMP:pyrophosphate phosphoribosyltransferase	prpp[c] + xan[c] -> xmp[c] + ppi[c]	( ( Moth_2106 ) or ( Moth_0720 ) )	Moth_2106 Moth_0720		Nucleotide Metabolism	0	0	1000	0	2.4.2.8
XTPASE	XTP pyrophosphohydrolase	xtp[c] + h2o[c] -> xmp[c] + ppi[c]	Moth_0084	Moth_0084		Nucleotide Metabolism	0	0	1000	0	3.6.1.19
YUMPS	Uracil hydro-lyase (adding D-ribose 5-phosphate)	ura[c] + r5p[c] <=> psd5p[c] + h2o[c]	( ( Moth_2426 and Moth_1053 ) or ( Moth_0869 and Moth_1352 and Moth_1744 ) )	Moth_1053 Moth_1352 Moth_1744 Moth_2426 Moth_0869		Nucleotide Metabolism	1	-1000	1000	0	4.2.1.70
CTPS1	CTP synthase (Adenosine)	nh4[c] + atp[c] + utp[c] <=> pi[c] + 2 h[c] + ctp[c] + adp[c]	Moth_2409	Moth_2409		Nucleotide Metabolism	1	-1000	1000	0	6.3.4.2
PUNP1	purine-nucleoside phosphorylase (Adenosine)	adn[c] + pi[c] <=> ade[c] + r1p[c]	Moth_1847	Moth_1847		Nucleotide Metabolism	1	-1000	1000	0	1
ADPT	adenine phosphoribosyltransferase	ade[c] + prpp[c] -> amp[c] + ppi[c]	Moth_0720	Moth_0720		Nucleotide Metabolism	0	0	1000	0	1
CTPS2	CTP synthase (glutamine)	atp[c] + gln-L[c] + h2o[c] + utp[c] -> adp[c] + ctp[c] + glu-L[c] + 2 h[c] + pi[c]	Moth_2409	Moth_2409		Nucleotide Metabolism	0	0	1000	0	1
DDPGA	4-Hydroxy-2-oxoglutarate glyoxylate-lyase	4h2oglt[c] <=> pyr[c] + glx[c]	Moth_0420	Moth_0420		Pentose Phosphate Pathway	1	-1000	1000	0	4.1.3.16
E4PD	D-erythrose 4-phosphate:NAD+ oxidoreductase	h2o[c] + nad[c] + e4p[c] <=> 2 h[c] + nadh[c] + 4per[c]	Moth_0262	Moth_0262		Pentose Phosphate Pathway	1	-1000	1000	0	1.2.1.72
EDA	2-dehydro-3-deoxy-D-gluconate-6-phosphate	2ddg6p[c] <=> pyr[c] + g3p[c]	Moth_0420	Moth_0420		Pentose Phosphate Pathway	1	-1000	1000	0	4.1.2.14
GTPDK	ATP:GTP 3'-pyrophosphotransferase	atp[c] + gtp[c] <=> gdptp[c] + amp[c]	Moth_1680	Moth_1680		Pentose Phosphate Pathway	1	-1000	1000	0	2.7.6.5
PGDH	6-Phospho-D-gluconate:NADP+ 2-oxidoreductase (decarboxylating)	6pgc[c] + nadp[c] -> nadph[c] + co2[c] + ru5p-D[c]	Moth_1283	Moth_1283		Pentose Phosphate Pathway	0	0	1000	0	1.1.1.44
RPE	D-Ribulose-5-phosphate 3-epimerase	ru5p-D[c] <=> xu5p-D[c]	Moth_0914	Moth_0914		Pentose Phosphate Pathway	1	-1000	1000	0	5.1.3.1
RPI	D-Ribose-5-phosphate ketol-isomerase	r5p[c] <=> ru5p-D[c]	Moth_2392	Moth_2392		Pentose Phosphate Pathway	1	-1000	1000	0	5.3.1.6
TALA	transaldolase	s7p[c] + g3p[c] <=> f6p[c] + e4p[c]	Moth_2403	Moth_2403		Pentose Phosphate Pathway	1	-1000	1000	0	2.2.1.2
TKT1	transketolase	s7p[c] + g3p[c] <=> xu5p-D[c] + r5p[c]	( ( Moth_0237 ) or ( Moth_0236 ) )	Moth_0236 Moth_0237		Pentose Phosphate Pathway	1	-1000	1000	0	2.2.1.1
TKT2	transketolase	f6p[c] + g3p[c] <=> xu5p-D[c] + e4p[c]	( ( Moth_0237 ) or ( Moth_0236 ) )	Moth_0236 Moth_0237		Pentose Phosphate Pathway	1	-1000	1000	0	2.2.1.1
G6PDH	glucose 6-phosphate dehydrogenase	nadp[c] + g6p[c] <=> nadph[c] + h[c] + 6pgl[c]	Moth_2302	Moth_2302		Pentose Phosphate Pathway	1	-1000	1000	0	1.1.1.49
G6PBDH	beta-D-Glucose-6-phosphate:NADP+ 1-oxoreductase	nadp[c] + g6p-B[c] <=> nadph[c] + h[c] + 6pgl[c]	Moth_2302	Moth_2302		Pentose Phosphate Pathway	1	-1000	1000	0	1.1.1.49
G6PDHy	D-Glucose-6-phosphate:NADP+ 1-oxoreductase	nadp[c] + g6p[c] <=> nadph[c] + h[c] + 6pgl[c]	Moth_2302	Moth_2302		Pentose Phosphate Pathway	1	-1000	1000	0	1.1.1.49
COt	CO transport via diffusion	co[c] <=> co[e]	NON-GENE ASSOCIATED	NON-GENE ASSOCIATED		Transport	1	-1000	1000	0	Undetermined
MEOHt	Methanol transport	meoh[c] <=> meoh[e]	NON-GENE ASSOCIATED	NON-GENE ASSOCIATED		Transport	1	-1000	1000	0	Undetermined
BTNabc	Biotin ABC transporter	btn[e] + h2o[c] + atp[c] -> pi[c] + h[c] + btn[c] + adp[c]	Moth_0144	Moth_0144		Transport	0	0	1000	0	Undetermined
BUTSabc	butanesulfonate transport via ABC system	buts[e] + h2o[c] + atp[c] -> pi[c] + buts[c] + h[c] + adp[c]	Moth_1982	Moth_1982		Transport	0	0	1000	0	Undetermined
CA2abc	calcium transport via ABC system	h2o[c] + atp[c] + ca2[e] -> pi[c] + h[c] + adp[c] + ca2[c]	Moth_1994	Moth_1994		Transport	0	0	1000	0	Undetermined
CBL1abc	Cob(1)alamin transport via ABC system	cbl1[e] + h2o[c] + atp[c] -> pi[c] + h[c] + cbl1[c] + adp[c]	Moth_1424	Moth_1424		Transport	0	0	1000	0	Undetermined
CBL2abc	Cobalamin uptake in via ABC transport	h2o[c] + cbl2[e] + atp[c] -> pi[c] + h[c] + adp[c] + cbl2[c]	Moth_1424	Moth_1424		Transport	0	0	1000	0	Undetermined
CBL3abc	Vitamin ABC transport	cbl3[e] + h2o[c] + atp[c] -> pi[c] + cbl3[c] + h[c] + adp[c]	Moth_1424	Moth_1424		Transport	0	0	1000	0	Undetermined
CD2abc	cadmium transport out via ABC system	h2o[c] + cd2[c] + atp[c] -> pi[c] + h[c] + cd2[e] + adp[c]	Moth_1994	Moth_1994		Transport	0	0	1000	0	TC-3.A.3
Clt	chloride ion transport out via diffusion	cl[e] <=> cl[c]	Moth_1346	Moth_1346		Transport	1	-1000	1000	0	Undetermined
CO2t	CO2 transport via diffusion	co2[e] <=> co2[c]	NON-GENE ASSOCIATED	NON-GENE ASSOCIATED		Transport	1	-1000	1000	0	Undetermined
COBALTt	cobalt transport in/out via permease (no H+)	cobalt2[e] <=> cobalt2[c]	Moth_0267	Moth_0267		Transport	0	0	1000	0	Undetermined
CU2abc	Copper export via ATPase	cu2[c] + h2o[c] + atp[c] -> pi[c] + cu2[e] + h[c] + adp[c]	Moth_1994	Moth_1994		Transport	0	0	1000	0	TC-3.A.3
ETHSabc	ethanesulfonate transport via ABC system	eths[e] + h2o[c] + atp[c] -> pi[c] + eths[c] + h[c] + adp[c]	Moth_1982	Moth_1982		Transport	0	0	1000	0	Undetermined
FE2abc	iron (II) transport via ABC system	fe2[e] + h2o[c] + atp[c] -> pi[c] + fe2[c] + h[c] + adp[c]	( ( Moth_1182 ) or ( Moth_1405 and Moth_1406 ) or ( Moth_1433 ) )	Moth_1182 Moth_1405 Moth_1406 Moth_1433		Transport	0	0	1000	0	Undetermined
FE3abc	Fe3+-ABC transport	h2o[c] + atp[c] + fe3[e] -> pi[c] + h[c] + adp[c] + fe3[c]	( ( Moth_1182 ) or ( Moth_1405 and Moth_1406 ) or ( Moth_1433 ) )	Moth_1182 Moth_1405 Moth_1406 Moth_1433		Transport	0	0	1000	0	Undetermined
FRUpts	D-fructose transport via PEP:Pyr PTS	fru[e] + pep[c] <=> pyr[c] + f1p[c]	Moth_0013	Moth_0013		Transport	1	-1000	1000	0	Undetermined
GALCTRt2	galactarate transport in via proton symport	h[e] + galctr-D[e] <=> h[c] + galctr-D[c]	Moth_0477	Moth_0477		Transport	1	-1000	1000	0	TC-2.A.3.1
GLCRt2	glucarate transport in via proton symport	h[e] + glcr[e] <=> h[c] + glcr[c]	Moth_0477	Moth_0477		Transport	1	-1000	1000	0	TC-2.A.3.1
GLCt2	D-glucose transport in via proton symport	glc-D[e] + h[e] -> glc-D[c] + h[c]	NON-GENE ASSOCIATED	NON-GENE ASSOCIATED		Transport	0	0	1000	0
GLNabc	L-Glutamine-ABC transport	gln-L[e] + h2o[c] + atp[c] -> pi[c] + gln-L[c] + h[c] + adp[c]	( Moth_1126 and Moth_1127 and Moth_1128 )	Moth_1126 Moth_1127 Moth_1128		Transport	0	0	1000	0	3.A.1.3
GLY3Pt	glycerol-3-phosphate transport in via proton symport	h[e] + glyc3p[e] <=> h[c] + glyc3p[c]	Moth_2103	Moth_2103		Transport	1	-1000	1000	0	Undetermined
GLYC3Pabc	sn-Glycerol ABC transport	h2o[c] + atp[c] + glyc3p[e] -> pi[c] + h[c] + adp[c] + glyc3p[c]	( ( Moth_1481 ) or ( Moth_1483 and Moth_1484 ) )	Moth_1481 Moth_1483 Moth_1484		Transport	0	0	1000	0	Undetermined
GLYCLTt2r	Glycolate transport via proton symport	glyclt[e] + h[e] <=> glyclt[c] + h[c]	Moth_2303	Moth_2303		Transport	1	-1000	1000	0	Undetermined
H2Ot	H2O transport via diffusion	h2o[c] <=> h2o[e]	NON-GENE ASSOCIATED	NON-GENE ASSOCIATED		Transport	1	-1000	1000	0	Undetermined
H2St	H2S transport via diffusion	h2s[c] <=> h2s[e]	NON-GENE ASSOCIATED	NON-GENE ASSOCIATED		Transport	1	-1000	1000	0	Undetermined
H2td	hydrogen transport via diffusion	h2[c] <=> h2[e]	Moth_2065	Moth_2065		Transport	1	-1000	1000	0	Undetermined
HEXSabc	hexanesulfonate transport via ABC system	h2o[c] + atp[c] + hexs[e] -> pi[c] + h[c] + adp[c] + hexs[c]	Moth_1982	Moth_1982		Transport	0	0	1000	0	Undetermined
HG2abc	Mercury (Hg+2) ABC transporter	h2o[c] + hg2[c] + atp[c] -> pi[c] + h[c] + hg2[e] + adp[c]	Moth_1994	Moth_1994		Transport	0	0	1000	0	Undetermined
HXANt2r	Hypoxanthine ion-coupled transport	hxan[e] + h[e] <=> hxan[c] + h[c]	Moth_1232	Moth_1232		Transport	1	-1000	1000	0	Undetermined
ILEabc	L-Isoleucine-ABC transport	h2o[c] + atp[c] + ile-L[e] -> pi[c] + h[c] + adp[c] + ile-L[c]	( Moth_2498 and Moth_2499 and Moth_2500 and Moth_2501 and Moth_2502 )	Moth_2498 Moth_2499 Moth_2500 Moth_2501 Moth_2502		Transport	0	0	1000	0	Undetermined
ISTNTabc	Isethionate transport via ABC system	istnt[e] + h2o[c] + atp[c] -> pi[c] + istnt[c] + h[c] + adp[c]	Moth_1982	Moth_1982		Transport	0	0	1000	0	Undetermined
Kt3	potassium transport out via proton antiport	h[e] + k[c] <=> h[c] + k[e]	( ( Moth_1754 and Moth_1755 ) or ( Moth_1347 and Moth_1348 ) or ( Moth_1794 ) )	Moth_1347 Moth_1348 Moth_1754 Moth_1755 Moth_1794		Transport	1	-1000	1000	0	TC-2.A.37
LCYSTabc	cysteate transport via ABC system	h2o[c] + atp[c] + Lcyst[e] -> pi[c] + h[c] + adp[c] + Lcyst[c]	Moth_1982	Moth_1982		Transport	0	0	1000	0	Undetermined
LEUabc	L-Leucine-ABC transport	leu-L[e] + h2o[c] + atp[c] -> pi[c] + leu-L[c] + h[c] + adp[c]	( Moth_2498 and Moth_2499 and Moth_2500 and Moth_2501 and Moth_2502 )	Moth_2498 Moth_2499 Moth_2500 Moth_2501 Moth_2502		Transport	0	0	1000	0	Undetermined
L-LACt2	L-lactate reversible transport via proton symport	h[e] + lac-L[e] <=> h[c] + lac-L[c]	Moth_2303	Moth_2303		Transport	1	-1000	1000	0	Undetermined
LYSt3r	L-lysine transport out via proton antiport	lys-L[c] + h[e] <=> lys-L[e] + h[c]	Moth_0820	Moth_0820		Transport	1	-1000	1000	0	Undetermined
METabc	L-Methionine ABC transport	h2o[c] + met-L[e] + atp[c] -> pi[c] + h[c] + adp[c] + met-L[c]	Moth_1988	Moth_1988		Transport	0	0	1000	0	Undetermined
METDabc	D-Methionine-ABC transport	met-D[e] + h2o[c] + atp[c] -> pi[c] + met-D[c] + h[c] + adp[c]	Moth_1988	Moth_1988		Transport	0	0	1000	0	Undetermined
METSabc	L-methionine S-oxide transport via ABC system	metox[e] + h2o[c] + atp[c] -> pi[c] + h[c] + metox[c] + adp[c]	Moth_1988	Moth_1988		Transport	0	0	1000	0	Undetermined
METSRabc	L-methionine R-oxide transport via ABC system	h2o[c] + atp[c] + metox-R[e] -> pi[c] + h[c] + adp[c] + metox-R[c]	Moth_1988	Moth_1988		Transport	0	0	1000	0	Undetermined
MGt5	magnesium transport in/out via permease (no H+)	mg2[e] <=> mg2[c]	Moth_0082	Moth_0082		Transport	1	-1000	1000	0	TC-1.A.35
MNabc	Manganese-ABC transport	h2o[c] + atp[c] + mn2[e] -> pi[c] + h[c] + adp[c] + mn2[c]	Moth_0267	Moth_0267		Transport	0	0	1000	0	3.A.1.15
MOBDabc	molybdate transport via ABC system	h2o[c] + mobd[e] + atp[c] -> pi[c] + h[c] + mobd[c] + adp[c]	( ( Moth_1425 and Moth_1428 ) or ( Moth_1822 and Moth_1823 and Moth_1824 ) )	Moth_1425 Moth_1428 Moth_1822 Moth_1823 Moth_1824		Transport	0	0	1000	0	TC-3.A.1.8
MOPSabc	3-(4-Morpholinyl)-1-propanesulfonate transport via ABC system	h2o[c] + atp[c] + mops[e] -> pi[c] + h[c] + adp[c] + mops[c]	Moth_1982	Moth_1982		Transport	0	0	1000	0	Undetermined
MSO3abc	methanesulfonate transport via ABC system	mso3[e] + h2o[c] + atp[c] -> pi[c] + h[c] + mso3[c] + adp[c]	Moth_1982	Moth_1982		Transport	0	0	1000	0	Undetermined
NH4t	Ammonia transport via diffusion	nh4[e] <=> nh4[c]	Moth_0192	Moth_0192		Transport	1	-1000	1000	0	Undetermined
PB2abc	Lead (Pb+2) ABC transporter	h2o[c] + atp[c] + Pb[c] -> pi[c] + h[c] + adp[c] + Pb[e]	Moth_1994	Moth_1994		Transport	0	0	1000	0	Undetermined
PIabc	Orthophosphate-ABC transport	pi[e] + h2o[c] + atp[c] <=> 2 pi[c] + h[c] + adp[c]	( Moth_0114 and Moth_0112 and Moth_0113 and Moth_0473 )	Moth_0112 Moth_0113 Moth_0114 Moth_0473		Transport	1	-1000	1000	0	TC-3.A.1.7
PIt6	phosphate transport in/out via proton symporter	pi[c] + h[c] -> pi[e] + h[e]	Moth_1237	Moth_1237		Transport	0	0	1000	0	TC-2.A.20
PIt7	phosphate transport in/out via three Na+ symporter	pi[e] + 3 na1[e] <=> pi[c] + 3 na1[c]	Moth_1817	Moth_1817		Transport	1	-1000	1000	0	TC-2.A.58
PROt4	Na+:proline symport	pro-L[e] + na1[e] <=> pro-L[c] + na1[c]	Moth_2279	Moth_2279		Transport	1	-1000	1000	0	Undetermined
RIBabc	D-Ribose ABC transport	h2o[c] + rib-D[e] + atp[c] -> pi[c] + h[c] + rib-D[c] + adp[c]	( ( Moth_1951 ) or ( Moth_0614 ) or ( Moth_0700 and Moth_0701 ) )	Moth_1951 Moth_0614 Moth_0700 Moth_0701		Transport	0	0	1000	0	3.A.1.2
SO4t2	sulfate transport in via proton symport	h[e] + so4[e] <=> h[c] + so4[c]	NON-GENE ASSOCIATED	NON-GENE ASSOCIATED		Transport	1	-1000	1000	0	TC-2.A.53
SPMDabc	Spermidine-ABC transport	h2o[c] + atp[c] + spmd[e] -> pi[c] + h[c] + adp[c] + spmd[c]	Moth_1823	Moth_1823		Transport	0	0	1000	0	Undetermined
SULAabc	sulfoacetate transport via ABC system	h2o[c] + atp[c] + sula[e] -> pi[c] + h[c] + adp[c] + sula[c]	Moth_1982	Moth_1982		Transport	0	0	1000	0	Undetermined
TAURabc	Taurine-ABC transport	taur[e] + h2o[c] + atp[c] -> pi[c] + taur[c] + h[c] + adp[c]	( ( Moth_1975 ) or ( Moth_0098 ) or ( Moth_1982 ) or ( Moth_0099 ) )	Moth_0098 Moth_0099 Moth_1975 Moth_1982		Transport	0	0	1000	0	3.A.1.17
VALabc	L-Valine-ABC transport	h2o[c] + atp[c] + val-L[e] -> pi[c] + h[c] + adp[c] + val-L[c]	( Moth_2498 and Moth_2499 and Moth_2500 and Moth_2501 and Moth_2502 )	Moth_2498 Moth_2499 Moth_2500 Moth_2501 Moth_2502		Transport	0	0	1000	0	Undetermined
XANt2	Xanthine ion-coupled transport	h[e] + xan[e] <=> h[c] + xan[c]	Moth_2118	Moth_2118		Transport	1	-1000	1000	0	TC-2.A.40
XYLabc	D-Xylose-ABC transport	xyl-D[e] + h2o[c] + atp[c] -> pi[c] + h[c] + xyl-D[c] + adp[c]	( Moth_2020 and Moth_2021 and Moth_2022 )	Moth_2020 Moth_2021 Moth_2022		Transport	0	0	1000	0	Undetermined
ZNabc	Zinc-ABC transport	zn2[e] + h2o[c] + atp[c] -> pi[c] + h[c] + zn2[c] + adp[c]	( ( Moth_1444 ) or ( Moth_0928 and Moth_0929 and Moth_0930 ) )	Moth_1444 Moth_0928 Moth_0929 Moth_0930		Transport	0	0	1000	0	TC-3.A.1.15
ACt2r	acetate reversible transport via proton symport	ac[e] + h[e] <=> ac[c] + h[c]	NON-GENE ASSOCIATED	NON-GENE ASSOCIATED		Transport	1	-1000	1000	0	Undetermined
NACt	Nicotinate transport	nac[e] <=> nac[c]	NON-GENE ASSOCIATED	NON-GENE ASSOCIATED		Transport	1	-1000	1000	0	N/A
FORt2	formate transport in via proton symport	h[e] + for[e] <=> h[c] + for[c]	Moth_2194	Moth_2194		Transport	1	-1000	1000	0	Undetermined

## Sheet: Table S4
Table S4. Metabolites of M. thermoacetica metabolic model (iAI558)
Metabolite name	Metabolite description	Metabolite neutral formula	Metabolite charged formula	Metabolite charge	Metabolite Compartment	Metabolite KeggID	Metabolite SEEDID
10fthf[c]	10-Formyltetrahydrofolate	C20H21N7O7	C20H21N7O7	-2	cytosol	C00234	cpd00201
12dag3p_MT[c]	1,2-diacyl-sn-glycerol 3-phosphate	C5H6O8PR2	C5H6O8PR2	-1	cytosol	C00416	cpd11422
12dgr_MT[c]	1,2-Diacyl-sn-glycerol	C5H6O5R2	C5H6O5R2	0	cytosol	C00165, C00641	cpd11423
12dgr120[c]	1,2-Diacyl-sn-glycerol-didodecanoyl	C27H52O5	C27H52O5	0	cytosol	None	cpd15306
12dgr140[c]	1,2-Diacyl-sn-glycerol-ditetradecanoyl	C31H60O5	C31H60O5	0	cytosol	None	cpd15307
12dgr160[c]	1,2-Diacyl-sn-glycerol-dihexadecanoyl	C35H68O5	C35H68O5	0	cytosol	None	cpd15309
12dgr161[c]	1,2-Diacyl-sn-glycerol-dihexadec-9-enoyl	C35H64O5	C35H64O5	0	cytosol	None	cpd15310
12dgr180[c]	1,2-Diacyl-sn-glycerol-dioctadecanoyl	C39H76O5	C39H76O5	0	cytosol	None	cpd15311
12dgr181[c]	1,2-Diacyl-sn-glycerol-dioctadec-11-enoyl	C39H72O5	C39H72O5	0	cytosol	None	cpd15312
13dpg[c]	3-phospho-d-glyceroyl-phosphate	C3H6O10P2	C3H6O10P2	-2	cytosol	C00236	cpd00203
15dap[c]	Pentamethylenediamine	C5H16N2	C5H16N2	2	cytosol	C01672	cpd01155
1ag3p_MT[c]	1-Acyl-sn-glycerol 3-phosphate	C1868H3636O700P100	C1868H3636O700P100	-200	cytosol	None	cpd11424
1ddecg3p[c]	1-dodecanoyl-sn-glycerol-3-phosphate	C15H30O7P	C15H30O7P	-1	cytosol	None	cpd15325
1hdec9eg3p[c]	1-hexadec-9-enoyl-sn-glycerol-3-phosphate	C19H36O7P	C19H36O7P	-1	cytosol	None	cpd15326
1hdecg3p[c]	1-hexadecanoyl-sn-glycerol-3-phosphate	C19H38O7P	C19H38O7P	-1	cytosol	None	cpd15327
1odec11eg3p[c]	1-octadec-11-enoyl-sn-glycerol-3-phosphate	C21H40O7P	C21H40O7P	-1	cytosol	None	cpd15328
1odecg3p[c]	1-octadecanoyl-sn-glycerol-3-phosphate	C21H42O7P	C21H42O7P	-1	cytosol	None	cpd15329
1pipdn2c[c]	delta1-Piperideine-2-carboxylate	C6H8NO2	C6H8NO2	-1	cytosol	C04092	cpd00352
1pyr5c[c]	1-Pyrroline-5-carboxylate	C5H6NO2	C5H6NO2	-1	cytosol	C03912	cpd02431
1tdec7eg3p[c]	1-tetradec-7-enoyl-sn-glycerol-3-phosphate	C17H32O7P	C17H32O7P	-1	cytosol	None	cpd15330
1tdecg3p[c]	1-tetradecanoyl-sn-glycerol-3-phosphate	C17H34O7P	C17H34O7P	-1	cytosol	None	cpd15331
23dhdp[c]	2-3-Dihydrodipicolinate	C7H5NO4	C7H5NO4	-2	cytosol	C03340	cpd02120
23dhmb[c]	R-2-3-Dihydroxy-3-methylbutanoate	C5H9O4	C5H9O4	-1	cytosol	C04039,C04272	cpd02498
23dhmp[c]	R-2-3-Dihydroxy-3-methylpentanoate	C6H11O4	C6H11O4	-1	cytosol	C04104,C06007	cpd00408
25aics[c]	5-phosphoribosyl-4-(N-succino-carboxamide)-5-aminoimidazole	C13H16N4O12P	C13H16N4O12P	-3	cytosol	C04823,C04811	cpd02921
25drapp[c]	2,5-diamino-6-hydroxy-4-(5-phosphoribosylamino)pyrimidine	C9H15N5O8P	C9H15N5O8P	-1	cytosol	C01304	cpd00957
26dap-LL[c]	LL-2-6-Diaminoheptanedioate	C7H14N2O4	C7H14N2O4	0	cytosol	C00666	cpd00504
26dap-M[c]	meso-2-6-Diaminoheptanedioate	C7H14N2O4	C7H14N2O4	0	cytosol	C00680	cpd00504
2ahbut[c]	S-2-Aceto-2-hydroxybutanoate	C6H9O4	C6H9O4	-1	cytosol	C00659,C06006	cpd00498
2ahhmd[c]	6-hydroxymethyl-dihydropterin-pyrophosphate	C7H9N5O8P2	C7H9N5O8P2	-2	cytosol	C04807	cpd02920
2ahhmp[c]	6-hydroxymethyl-dihydropterin	C7H9N5O2	C7H9N5O2	0	cytosol	C01300	cpd00954
2aobut[c]	(S)-2-Amino-3-oxobutanoic-acid	C4H7NO3	C4H7NO3	0	cytosol	C03508	cpd00346
2beACP[c]	But-2-enoyl-[acyl-carrier-protein]	C15H25N2O8PRS	C15H25N2O8PRS	-1	cytosol	C04246	cpd11465
2c25dho[c]	gamma-Carboxymuconolactone	C7H4O6	C7H4O6	-2	cytosol	C01278	cpd00938
2cpr5p[c]	1-2-Carboxyphenylamino-1-deoxy-D-ribulose5-phosphate	C12H14NO9P	C12H14NO9P	-2	cytosol	C01302,C10528	cpd00956
2dda7p[c]	3-deoxy-d-arabino-heptulosonate-7-phosphate	C7H11O10P	C7H11O10P	-2	cytosol	C04691	cpd02857
2ddg6p[c]	2-keto-3-deoxy-6-phospho-gluconate	C6H9O9P	C6H9O9P	-2	cytosol	C04442	cpd02711
2ddglcn[c]	2-keto-3-deoxygluconate	C6H9O6	C6H9O6	-1	cytosol	C00204	cpd00176
2dhp[c]	2-Dehydropantoate	C6H9O4	C6H9O4	-1	cytosol	C00966	cpd00498
2dmmq8[c]	2-Demethylmenaquinone-8	C50H70O2	C50H70O2	0	cytosol	C05818	cpd15352
2dmmql8[c]	2-Demethylmenaquinol-8	C50H72O2	C50H72O2	0	cytosol	C19847	cpd15353
2dr1p[c]	deoxyribose-1-phosphate	C5H10O7P	C5H10O7P	-1	cytosol	C00672	cpd00509
2dr5p[c]	deoxyribose-5-phosphate	C5H10O7P	C5H10O7P	-1	cytosol	C00673	cpd00509
2ippm[c]	beta-Isopropylmaleate	C7H8O4	C7H8O4	-2	cytosol	C02631	cpd01710
2maacoa[c]	2-Methyl-3-acetoacetyl-CoA	C26H39N7O18P3S	C26H39N7O18P3S	-3	cytosol	C03344	cpd02124
2mahmp[c]	2-Methyl-4-amino-5-hydroxymethylpyrimidinediphosphate	C6H9N3O7P2	C6H9N3O7P2	-2	cytosol	C04752	cpd02894
2mbcoa[c]	2-Methyl-butyryl-CoA	C26H41N7O17P3S	C26H41N7O17P3S	-3	cytosol	C01033,C15980	cpd00760
2me4p[c]	2-c-methyl-d-erythritol-4-phosphate	C5H12O7P	C5H12O7P	-1	cytosol	C11434	cpd08286
2mecdp[c]	2-c-methyl-d-erythritol-2,4-cyclodiphosphate	C5H10O9P2	C5H10O9P2	-2	cytosol	C11453	cpd08301
2obut[c]	alpha-Ketobutyrate	C4H6O3	C4H5O3	-1	cytosol	C00109	cpd00094
2ombz[c]	2-Octaprenyl-6-methoxy-1,4-benzoquinone	C47H70O3	C47H70O3	0	cytosol	C05813	cpd03447
2ommb[c]	2-Octaprenyl-3-methyl-6-methoxy-1,4-benzoquinone	C48H72O3	C48H72O3	0	cytosol	C05814	cpd03448
2oph[c]	2-Octaprenylphenol	C46H70O	C46H70O	0	cytosol	C05810	cpd03444
2p4c2me[c]	2-phospho-4-cytidine5-diphospho-2-C-methyl-D-erythritol	C14H23N3O17P3	C14H23N3O17P3	-3	cytosol	C11436	cpd08288
2pg[c]	D-Glycerate2-phosphate	C3H5O7P	C3H5O7P	-2	cytosol	C00631	cpd00169
2shchc[c]	(1R,6R)-2-Succinyl-6-hydroxy-2,4-cyclohexadiene-1-carboxylate	C11H10O6	C11H10O6	-2	cytosol	C05817	cpd03451
2tddACP[c]	trans-Dodec-2-enoyl-[acp]	C23H41N2O8PRS	C23H41N2O8PRS	-1	cytosol	C05758	cpd11469
2tdeACP[c]	trans-Dec-2-enoyl-[acp]	C21H37N2O8PRS	C21H37N2O8PRS	-1	cytosol	C05754	cpd11475
2theACP[c]	trans-Hex-2-enoyl-[acp]	C17H29N2O8PRS	C17H29N2O8PRS	-1	cytosol	C05748	cpd11473
2toceACP[c]	trans-Oct-2-enoyl-[acp]	C19H33N2O8PRS	C19H33N2O8PRS	-1	cytosol	C05751	cpd11471
34hpp[c]	p-hydroxyphenylpyruvate	C9H7O4	C9H7O4	-1	cytosol	C01179	cpd00868
36dahx[c]	L-beta-Lysine	C6H15N2O2	C6H15N2O2	1	cytosol	C01142	cpd00039
3c2hmp[c]	2-D-threo-Hydroxy-3-carboxy-isocaproate	C7H10O5	C7H10O5	-2	cytosol	C04411	cpd01646
3c3hmp[c]	3-Hydroxy-4-methyl-3-carboxypentanoate	C7H10O5	C7H10O5	-2	cytosol	C02504	cpd01646
3c4mop[c]	2-isopropyl-3-oxosuccinate	C7H8O5	C7H8O5	-2	cytosol	C04236	cpd02605
3dhq[c]	5-Dehydroquinic-acid	C7H9O6	C7H9O6	-1	cytosol	C00944	cpd00699
3dhsk[c]	3-Dehydroshikimate	C7H7O5	C7H7O5	-1	cytosol	C02637	cpd01716
3hbACP[c]	(3R)-3-Hydroxybutanoyl-[acyl-carrier-protein]	C15H27N2O9PRS	C15H27N2O9PRS	-1	cytosol	C04618	cpd11478
3hddACP[c]	(R)-3-Hydroxydodecanoyl-[acp]	C23H43N2O9PRS	C23H43N2O9PRS	-1	cytosol	C05757	cpd11480
3hdeACP[c]	(3R)-3-Hydroxydecanoyl-[acyl-carrier-protein]	C21H39N2O9PRS	C21H39N2O9PRS	-1	cytosol	C04619	cpd11482
3hhACP[c]	(R)-3-Hydroxyhexanoyl-[acp]	C17H31N2O9PRS	C17H31N2O9PRS	-1	cytosol	C05747	cpd11479
3hocACP[c]	(3R)-3-Hydroxyoctanoyl-[acyl-carrier-protein]	C19H35N2O9PRS	C19H35N2O9PRS	-1	cytosol	C04620	cpd11483
3hodacp[c]	3-Hydroxyoctodecanoyl-ACP	C29H55N2O9PRS	C29H55N2O9PRS	-1	cytosol	None	cpd11571
3hpaACP[c]	(3R)-3-Hydroxypalmitoyl-[acyl-carrier-protein]	C27H51N2O9PRS	C27H51N2O9PRS	-1	cytosol	C04633	cpd11481
3htdACP[c]	(3R)-3-Hydroxytetradecanoyl-[acyl-carrier-protein]	C25H47N2O9PRS	C25H47N2O9PRS	-1	cytosol	C04688	cpd11484
3ig3p[c]	1-(indol-3-yl)glycerol-3-phosphate	C11H13NO6P	C11H13NO6P	-1	cytosol	C03506	cpd02210
3mob[c]	2-keto-isovalerate	C5H7O3	C5H7O3	-1	cytosol	C00141	cpd00123
3mop[c]	2-keto-3-methyl-valerate	C6H9O3	C6H9O3	-1	cytosol	C03465,C00671	cpd00200
3odcoa[c]	3-Oxodecanoyl-CoA	C31H49N7O18P3S	C31H49N7O18P3S	-3	cytosol	C05265	cpd03119
3oddcoa[c]	3-Oxododecanoyl-CoA	C33H53N7O18P3S	C33H53N7O18P3S	-3	cytosol	C05263	cpd03117
3ohcoa[c]	3-Ketohexanoyl-CoA	C27H41N7O18P3S	C27H41N7O18P3S	-3	cytosol	C05269	cpd03123
3ohdcoa[c]	3-Oxohexadecanoyl-CoA	C37H61N7O18P3S	C37H61N7O18P3S	-3	cytosol	C05259	cpd03114
3oocoa[c]	3-Oxooctanoyl-CoA	C29H45N7O18P3S	C29H45N7O18P3S	-3	cytosol	C05267	cpd03121
3oodacp[c]	3-Oxooctodecanoyl-ACP	C29H53N2O9PRS	C29H53N2O9PRS	-1	cytosol	None	cpd11570
3ophb[c]	3-Octaprenyl-4-hydroxybenzoate	C47H69O3	C47H69O3	-1	cytosol	C05809	cpd03443
3otdcoa[c]	3-Oxotetradecanoyl-CoA	C35H57N7O18P3S	C35H57N7O18P3S	-3	cytosol	C05261	cpd12689
3oxddACP[c]	3-Oxododecanoyl-[acp]	C23H41N2O9PRS	C23H41N2O9PRS	-1	cytosol	C05756	cpd11489
3oxdeACP[c]	3-Oxodecanoyl-[acp]	C21H37N2O9PRS	C21H37N2O9PRS	-1	cytosol	C05753	cpd11487
3oxhACP[c]	3-Oxohexanoyl-[acp]	C17H29N2O9PRS	C17H29N2O9PRS	-1	cytosol	C05746	cpd11486
3oxhdACP[c]	3-Oxohexadecanoyl-[acp]	C27H49N2O9PRS	C27H49N2O9PRS	-1	cytosol	C05762	cpd11485
3oxocACP[c]	3-Oxooctanoyl-[acp]	C19H33N2O9PRS	C19H33N2O9PRS	-1	cytosol	C05750	cpd11490
3oxtdACP[c]	3-Oxotetradecanoyl-[acp]	C25H45N2O9PRS	C25H45N2O9PRS	-1	cytosol	C05759	cpd11491
3pg[c]	DL-Glycerate-3-phosphate	C3H5O7P	C3H5O7P	-2	cytosol	C00197	cpd00169
3php[c]	3-phospho-hydroxypyruvate	C3H3O7P	C3H3O7P	-2	cytosol	C03232	cpd02069
3psme[c]	5-O-1-Carboxyvinyl-3-phosphoshikimate	C10H10O10P	C10H10O10P	-3	cytosol	C01269	cpd00932
4abz[c]	p-Aminobenzoate	C7H6NO2	C7H6NO2	-1	cytosol	C00568	cpd00093
4adcho[c]	4-Amino-4-deoxychorismate	C10H10NO5	C10H10NO5	-1	cytosol	C11355	cpd08210
4ahmmp[c]	4-Amino-2-methyl-5-pyrimidinemethanol	C6H9N3O	C6H9N3O	0	cytosol	C01279	cpd00939
4ampm[c]	4-Amino-5-phosphomethyl-2-methylpyrimidine	C6H9N3O4P	C6H9N3O4P	-1	cytosol	C04556	cpd02775
4c2me[c]	4-cytidine5-diphospho-2-C-methyl-D-erythritol	C14H23N3O14P2	C14H23N3O14P2	-2	cytosol	C11435	cpd08287
4gudbd[c]	4-Guanidinobutanamide	C5H13N4O	C5H13N4O	1	cytosol	C03078	cpd01973
4gudbutn[c]	4-Guanidinobutanoate	C5H11N3O2	C5H11N3O2	0	cytosol	C01035	cpd00762
4h2oglt[c]	D-4-Hydroxy-2-oxoglutarate	C5H4O6	C5H4O6	-2	cytosol	C05946,C01127	cpd00830
4h2opntn[c]	4-Hydroxy-2-oxovalerate	C5H7O4	C5H7O4	-1	cytosol	C03589	cpd00668
4hba[c]	4-Hydroxy-benzyl-alcohol	C7H8O2	C7H8O2	0	cytosol	None	cpd15378
4hbz[c]	Hydroxybenzenecarboxylic-acid	C7H5O3	C7H5O3	-1	cytosol	C00156	cpd00136
4hthr[c]	4-Hydroxy-L-threonine	C4H9NO4	C4H9NO4	0	cytosol	C06056	cpd03608
4mhetz[c]	4-Methyl-5-2-hydroxyethyl-thiazole	C6H9NOS	C6H9NOS	0	cytosol	C04294	cpd02636
4mop[c]	2-ketoisocaproate	C6H9O3	C6H9O3	-1	cytosol	C00233	cpd00200
4mpetz[c]	4-methyl-5-(2-phosphoethyl)-thiazole	C6H9NO4PS	C6H9NO4PS	-1	cytosol	C04327	cpd02654
4pasp[c]	L-4-Aspartyl-phosphate	C4H7NO7P	C4H7NO7P	-1	cytosol	C03082	cpd01977
4per[c]	4-Phosphoerythronate	C4H7O8P	C4H7O8P	-2	cytosol	C03393	cpd02147
4ppan[c]	D-4-Phosphopantothenate	C9H16NO8P	C9H16NO8P	-2	cytosol	C03492	cpd02201
4ppcys[c]	N-(-R-4-Phosphopantothenoyl)-L-cysteine	C12H21N2O9PS	C12H21N2O9PS	-2	cytosol	C04352	cpd02666
4r5au[c]	4-1-D-Ribitylamino-5-aminouracil	C9H16N4O6	C9H16N4O6	0	cytosol	C04732	cpd02882
5aizc[c]	1-(5-phosphoribosyl)-5-amino-4-imidazolecarboxylate	C9H13N3O9P	C9H13N3O9P	-1	cytosol	C04751	cpd02893
5aop[c]	5-amino-levulinate	C5H9NO3	C5H9NO3	0	cytosol	C00430	cpd00338
5aprbu[c]	5-Amino-6-5-phosphoribitylaminouracil	C9H16N4O9P	C9H16N4O9P	-1	cytosol	C04454	cpd02720
5apru[c]	5-Amino-6-5-phosphoribosylaminouracil	C9H14N4O9P	C9H14N4O9P	-1	cytosol	C01268	cpd00931
5fthf[c]	5-Methyltetrahydrofolate	C20H21N7O7	C20H21N7O7	-2	cytosol	C03479	cpd00201
5mcsn[c]	5-Methylcytosine	C5H7N3O	C5H7N3O	0	cytosol	C02376	cpd01587
5mdr1p[c]	methylthioribose-1-phosphate	C6H12O7PS	C6H12O7PS	-1	cytosol	C04188	cpd02574
5mdru1p[c]	methylthioribulose-1-phosphate	C6H12O7PS	C6H12O7PS	-1	cytosol	C04582	cpd02574
5mta[c]	Methylthioadenosine	C11H15N5O3S	C11H15N5O3S	0	cytosol	C00170	cpd00147
5mthf[c]	5-Methyltetrahydrofolate	C20H23N7O6	C20H23N7O6	-2	cytosol	C00440	cpd00345
5odhf2a[c]	3-oxoadipate-enol-lactone	C6H5O4	C6H5O4	-1	cytosol	C03586	cpd02255
5prdmbz[c]	alpha-Ribazole-5'-phosphate	C14H18N2O7P	C14H18N2O7P	-1	cytosol	C04778	cpd02904
6a2ohxnt[c]	2-Oxo-6-aminocaproate	C6H11NO3	C6H11NO3	0	cytosol	C03239	cpd02074
6pgc[c]	6-Phospho-D-gluconate	C6H11O10P	C6H11O10P	-2	cytosol	C00345	cpd00284
6pgl[c]	6-phospho-D-glucono-1-5-lactone	C6H10O9P	C6H10O9P	-1	cytosol	C01236	cpd00911
aacoa[c]	3-Acetoacetyl-CoA	C25H37N7O18P3S	C25H37N7O18P3S	-3	cytosol	C00332	cpd00279
aact[c]	1-Amino-2-propanone	C3H8NO	C3H8NO	1	cytosol	C01888	cpd01298
ac[c]	Acetate	C2H4O2	C2H3O2	-1	cytosol	C00033	cpd00029
ac[e]	Acetate	C2H4O2	C2H3O2	-1	extracellular	C00033	cpd00029
acACP[c]	Acetyl-[acyl-carrier-protein]	C13H23N2O8PRS	C13H23N2O8PRS	-1	cytosol	C03939	cpd11494
acald[c]	Acetaldehyde	C2H4O	C2H4O	0	cytosol	C00084	cpd00071
accoa[c]	Acetyl-coenzyme A	C23H38N7O17P3S	C23H35N7O17P3S	-3	cytosol	C00024	cpd00022
acg5p[c]	n-acetylglutamyl-phosphate	C7H10NO8P	C7H10NO8P	-2	cytosol	C04133	cpd02552
acg5sa[c]	2-Acetamido-5-oxopentanoate	C7H10NO4	C7H10NO4	-1	cytosol	C01250	cpd00918
acgam1p[c]	N-Acetyl-D-glucosamine1-phosphate	C8H15NO9P	C8H15NO9P	-1	cytosol	C04501,C04256	cpd02611
acglu[c]	N-Acetyl-L-glutamic-acid	C7H9NO5	C7H9NO5	-2	cytosol	C00624	cpd00477
achms[c]	O-Acetyl-L-homoserine	C6H11NO4	C6H11NO4	0	cytosol	C01077	cpd00790
acmam[c]	N-Acetyl-D-muramoate	C11H18NO8	C11H18NO8	-1	cytosol	None	cpd03485
acmama[c]	N-Acetyl-D-muramoyl-L-alanine	C14H23N2O9	C14H23N2O9	-1	cytosol	C02999	cpd01923
acnam[c]	N-Acetylneuraminic acid	C11H18NO9	C11H18NO9	-1	cytosol	C00270	cpd00232
acorn[c]	N-acetyl-L-ornithine	C7H14N2O3	C7H14N2O3	0	cytosol	C00437	cpd00342
ACP[c]	Acyl-carrier-protein	C11H21N2O7PRS	C11H21N2O7PRS	-1	cytosol	C00229	cpd11493
acser[c]	O3-Acetyl-L-serine	C5H9NO4	C5H9NO4	0	cytosol	C00979	cpd00722
actACP[c]	Acetoacetyl-[acp]	C15H25N2O9PRS	C15H25N2O9PRS	-1	cytosol	C05744	cpd11488
actp[c]	acetyl-phosphate	C2H4O5P	C2H4O5P	-1	cytosol	C00227	cpd00196
adcobdam[c]	Adenosylcobyrinic-acid a,c-diamide	C55H69CoN11O15	C55H69CoN11O15	-3	cytosol	C06506	cpd03916
adcobhex[c]	adenosyl-cobyric-acid	C55H77CoN15O11	C55H77CoN15O11	1	cytosol	C06507	cpd03917
ade[c]	6-Aminopurine	C5H5N5	C5H5N5	0	cytosol	C00147	cpd00128
adn[c]	Adenosine	C10H13N5O4	C10H13N5O4	0	cytosol	C00212	cpd00182
adocbi[c]	Adenosyl-cobinamide	C58H85CoN16O11	C58H85CoN16O11	2	cytosol	C06508	cpd03918
adocbip[c]	Adenosyl-cobinamide phosphate	C58H84CoN16O14P	C58H84CoN16O14P	0	cytosol	C06509	cpd03919
adocbl[c]	Funacomide	C72H101CoN18O17P	C72H101CoN18O17P	1	cytosol	C00194	cpd00166
adp[c]	Adenosine-5'-diphosphate	C10H15N5O10P2	C10H13N5O10P2	-2	cytosol	C00008	cpd00008
adpglc[c]	ADPglucose	C16H23N5O15P2	C16H23N5O15P2	-2	cytosol	C00498	cpd00387
adprib[c]	ADPribose	C15H21N5O14P2	C15H21N5O14P2	-2	cytosol	None	cpd00251
agdpcbi[c]	Adenosylcobinamide-GDP	C68H96CoN21O21P2	C68H96CoN21O21P2	0	cytosol	C06510	cpd03920
agm[c]	(4-Aminobutyl)-guanidine	C5H16N4	C5H16N4	2	cytosol	C00179	cpd00152
ahcys[c]	s-adenosyl-homocysteine	C14H20N6O5S	C14H20N6O5S	0	cytosol	C00021	cpd00019
ahdt[c]	7,8-Dihydroneopterin-3'-triphosphate	C9H13N5O13P3	C9H13N5O13P3	-3	cytosol	C04895	cpd02978
aicar[c]	5-Amino-1-5-Phospho-D-ribosylimidazole-4-carboxamide	C9H14N4O8P	C9H14N4O8P	-1	cytosol	C04677	cpd02851
air[c]	1-(5-phosphoribosyl)-5-aminoimidazole	C8H14N3O7P	C8H14N3O7P	0	cytosol	C03373	cpd02140
akg[c]	alpha-Ketoglutaric-acid	C5H6O5	C5H4O5	-2	cytosol	C00026	cpd00024
alaala[c]	D-Ala-D-Ala	C6H12N2O3	C6H12N2O3	0	cytosol	C00993	cpd00731
ala-B[c]	3-Aminopropanoate	C3H7NO2	C3H7NO2	0	cytosol	C00099	cpd00035
alac-S[c]	2-aceto-lactate	C5H7O4	C5H7O4	-1	cytosol	C06010,C00900	cpd00668
ala-D[c]	D-Alanine	C3H7NO2	C3H7NO2	0	cytosol	C00133	cpd00035
ala-L[c]	L-Alanine	C3H7NO2	C3H7NO2	0	cytosol	C00041	cpd00035
alpro[c]	S-Aminomethyldihydrolipoylprotein	C2H7NRS2	C2H7NRS2	1	cytosol	C01242	cpd11830
amet[c]	S-Adenosyl-L-methionine	C15H22N6O5S	C15H23N6O5S	1	cytosol	C00019	cpd00017
ametam[c]	S-Adenosyl-(5')-3-methylthiopropylamine	C14H24N6O3S	C14H24N6O3S	2	cytosol	C01137	cpd00837
amp[c]	Adenosine-5'-phosphate	C10H14N5O7P	C10H13N5O7P	-1	cytosol	C00020	cpd00018
anth[c]	2-Aminobenzoate	C7H7NO2	C7H6NO2	-1	cytosol	C00108	cpd00093
apoACP[c]	Apo-[acyl-carrier-protein]	HOR	HOR	0	cytosol	C03688	cpd12370
appl[c]	1-Aminopropan-2-ol	C3H10NO	C3H10NO	1	cytosol	C03194	cpd02039
applp[c]	(R)-1-Aminopropan-2-yl-phosphate	C3H10NO4P	C3H10NO4P	0	cytosol	C04122	cpd02547
arg-L[c]	L-Arginine	C6H14N4O2	C6H15N4O2	1	cytosol	C00062	cpd00051
argsuc[c]	l-arginino-succinate	C10H17N4O6	C10H17N4O6	-1	cytosol	C03406	cpd02152
asn-L[c]	L-Asparagine	C4H8N2O3	C4H8N2O3	0	cytosol	C00152	cpd00132
asp-L[c]	Aspartic acid	C4H7NO4	C4H6NO4	-1	cytosol	C00049	cpd00041
aspsa[c]	L-Aspartate4-semialdehyde	C4H7NO3	C4H7NO3	0	cytosol	C00441	cpd00346
atp[c]	Adenosine-5'-triphosphate	C10H16N5O13P3	C10H13N5O13P3	-3	cytosol	C00002	cpd00002
btamp[c]	Biotinyl-5-AMP	C20H27N7O9PS	C20H27N7O9PS	-1	cytosol	C05921	cpd03517
btcoa[c]	Butyryl-CoA	C25H39N7O17P3S	C25H39N7O17P3S	-3	cytosol	C00136	cpd00120
btn[c]	Biotine	C10H16N2O3S	C10H15N2O3S	-1	cytosol	C00120	cpd00104
btn[e]	Biotine	C10H16N2O3S	C10H15N2O3S	-1	extracellular	C00120	cpd00104
butACP[c]	Butyryl-[acp]	C15H27N2O8PRS	C15H27N2O8PRS	-1	cytosol	C05745	cpd11464
buts[c]	butanesulfonate	C4H9O3S	C4H9O3S	-1	cytosol	None	cpd11596
buts[e]	butanesulfonate	C4H9O3S	C4H9O3S	-1	extracellular	None	cpd11596
ca2[c]	Calcium	Ca2+	Ca	2	cytosol	C00076	cpd00063
ca2[e]	Calcium	Ca2+	Ca	2	extracellular	C00076	cpd00063
camp[c]	Adenosine 3',5'-phosphate	C10H11N5O6P	C10H11N5O6P	-1	cytosol	C00575	cpd00446
cbasp[c]	N-Carbamoyl-L-aspartate	C5H6N2O5	C5H6N2O5	-2	cytosol	C00438	cpd00343
cbi[c]	Cobinamide	C48H73CoN11O8	C48H73CoN11O8	3	cytosol	C05774	cpd03422
cbl1[c]	Cob(I)alamin	C62H89CoN13O14P	C62H89CoN13O14P	1	cytosol	C00853	cpd00423
cbl1[e]	Cob(I)alamin	C62H89CoN13O14P	C62H89CoN13O14P	1	extracellular	C00853	cpd00423
cbl2[c]	Cob(II)alamin	C62H89CoN13O14P	C62H89CoN13O14P	1	cytosol	C00541	cpd00423
cbl2[e]	Cob(II)alamin	C62H89CoN13O14P	C62H89CoN13O14P	1	extracellular	C00541	cpd00423
cbl3[c]	Cob(III)alamin	C61H86CoN13O14PR	C61H86CoN13O14PR	6	cytosol	C05776	cpd03424
cbl3[e]	Cob(III)alamin	C61H86CoN13O14PR	C61H86CoN13O14PR	6	extracellular	C05776	cpd03424
cbp[c]	carbamoyl-phosphate	CH3NO5P	CH3NO5P	-1	cytosol	C00169	cpd00146
cd2[c]	Cadmium	Cd	Cd	2	cytosol	C01413	cpd01012
cd2[e]	Cadmium	Cd	Cd	2	extracellular	C01413	cpd01012
cdlp_MT[c]	Cardiolipin (cdlp_MT)	C7172H13744O1700P200	C7172H13744O1700P200	-200	cytosol	C05980	cpd11426
cdp[c]	Cytidine-diphosphate	C9H15N3O11P2	C9H13N3O11P2	-2	cytosol	C00112	cpd00096
cdpdag_MT[c]	CDP-diacylglycerol	C14H17N3O15P2R2	C14H17N3O15P2R2	-2	cytosol	C00269	cpd11427
cdpdddecg[c]	CDP-1,2-didodecanoylglycerol	C36H63N3O15P2	C36H63N3O15P2	-2	cytosol	None	cpd15417
cdpdhdec9eg[c]	CDP-1,2-dihexadec-9-enoylglycerol	C44H75N3O15P2	C44H75N3O15P2	-2	cytosol	None	cpd15418
cdpdhdecg[c]	CDP-1,2-dihexadecanoylglycerol	C44H79N3O15P2	C44H79N3O15P2	-2	cytosol	None	cpd15419
cdpdodec11eg[c]	CDP-1,2-dioctadec-11-enoylglycerol	C48H83N3O15P2	C48H83N3O15P2	-2	cytosol	None	cpd15420
cdpdodecg[c]	CDP-1,2-dioctadecanoylglycerol	C48H87N3O15P2	C48H87N3O15P2	-2	cytosol	None	cpd15421
cdpdtdec7eg[c]	CDP-1,2-ditetradec-7-enoylglycerol	C40H67N3O15P2	C40H67N3O15P2	-2	cytosol	None	cpd15422
cdpdtdecg[c]	CDP-1,2-ditetradecanoylglycerol	C40H71N3O15P2	C40H71N3O15P2	-2	cytosol	None	cpd15423
cdpglyc[c]	CDPglycerol	C12H19N3O13P2	C12H19N3O13P2	-2	cytosol	C00513	cpd00402
cgly[c]	L-Cysteinylglycine	C5H10N2O3S	C5H10N2O3S	0	cytosol	C01419	cpd01017
chor[c]	Chorismic-acid	C10H8O6	C10H8O6	-2	cytosol	C00251	cpd00216
cit[c]	2-Hydroxytricarballylic-acid	C6H5O7	C6H5O7	-3	cytosol	C00158	cpd00137
citr-L[c]	Citrulline	C6H13N3O3	C6H13N3O3	0	cytosol	C00327	cpd00274
cl[c]	Chloride	Cl	Cl	-1	cytosol	C00698,C01327	cpd00099
cl[e]	Chloride	Cl	Cl	-1	extracellular	C00698,C01327	cpd00099
s[c]	Sulfur	S			cytosol	C17023	cpd17287
cmp[c]	Cytidylic-acid	C9H14N3O8P	C9H13N3O8P	-1	cytosol	C00055	cpd00046
cmpacna[c]	CMP-N-acetylneuraminate	C20H29N4O16P	C20H29N4O16P	-2	cytosol	C00128	cpd00112
co1dam[c]	Cob(I)yrinic-acid a,c-diamide	C45H57CoN6O12	C45H57CoN6O12	-3	cytosol	C06505	cpd03914
co2[c]	Carbon-dioxide	CO2	CO2	0	cytosol	C00011	cpd00011
co2[e]	Carbon-dioxide	CO2	CO2	0	extracellular	C00011	cpd00011
co[c]	Carbon-monoxide	CO	CO	2	cytosol	C00237	cpd00149
co[e]	Carbon-monoxide	CO	CO	2	extracellular	C00237	#N/A
co2dam[c]	Cob(II)yrinic-acid a,c-diamide	C45H57CoN6O12	C45H57CoN6O12	-3	cytosol	C06504	cpd03914
coa[c]	CoenzymeA	C21H36N7O16P3S	C21H33N7O16P3S	-3	cytosol	C00010	cpd00010
cobalt2[c]	Cobalt	Co	Co	2	cytosol	C00175	cpd00149
cobalt2[e]	Cobalt	Co	Co	2	extracellular	C00175	cpd00149
cobya[c]	Cobyrinic-acid	C45H53CoN4O14	C45H53CoN4O14	-5	cytosol	C05773	cpd03421
codhpre6[c]	Cobalt-precorrin-6B	C44H48CoN4O16	C44H48CoN4O16	-6	cytosol	C11543	cpd08373
copre2[c]	Cobalt-sirohydrochlorin	C42H40CoN4O16	C42H40CoN4O16	-6	cytosol	C11538	cpd08368
copre3[c]	Cobalt-precorrin-3	C43H42CoN4O16	C43H42CoN4O16	-6	cytosol	C11539	cpd08369
copre4[c]	Cobalt-precorrin-4	C44H44CoN4O16	C44H44CoN4O16	-6	cytosol	C11540	cpd08370
copre5[c]	Cobalt-precorrin-5A	C45H47CoN4O16	C45H47CoN4O16	-5	cytosol	C11541,C16242	cpd08371
copre6[c]	Cobalt-precorrin-6A	C44H46CoN4O16	C44H46CoN4O16	-6	cytosol	C11542	cpd08372
copre8[c]	Cobalt-precorrin-8	C45H53CoN4O14	C45H53CoN4O14	-5	cytosol	C11545	cpd03421
cp5b[c]	Cobalt-precorrin-5B	C43H44CoN4O16	C43H44CoN4O16	-6	cytosol	C16243	cpd14960
cp7[c]	Cobalt-precorrin-7	C45H50CoN4O16	C45H50CoN4O16	-6	cytosol	C16244	cpd14961
cpppg3[c]	CoproporphyrinogenIII	C36H40N4O8	C36H40N4O8	-4	cytosol	C03263	cpd02083
csn[c]	Cytosine	C4H5N3O	C4H5N3O	0	cytosol	C00380	cpd00307
ctp[c]	Cytidine-triphosphate	C9H16N3O14P3	C9H13N3O14P3	-3	cytosol	C00063	cpd00052
cu2[c]	Copper	Cu2+	Cu	2	cytosol	C00070	cpd00058
cu2[e]	Copper	Cu2+	Cu	2	extracellular	C00070	cpd00058
cys-L[c]	L-Cysteine	C3H7NO2S	C3H7NO2S	0	cytosol	C00097	cpd00084
cysth-L[c]	L-Cystathionine	C7H14N2O4S	C7H14N2O4S	0	cytosol	None	cpd00424
cytd[c]	Cytidine	C9H13N3O5	C9H13N3O5	0	cytosol	C00491,C00475,C00542,C02291	cpd00367
d12dg_MT[c]	diglucosyl-1,2 diacylglycerol	C4636H8672O1500	C4636H8672O1500	0	cytosol	None	cpd11428
dadp[c]	2'-Deoxyadenosine-5'-diphosphate	C10H13N5O9P2	C10H13N5O9P2	-2	cytosol	C00206	cpd00177
damp[c]	Deoxyadenosine-monophosphate	C10H13N5O6P	C10H13N5O6P	-1	cytosol	C00360	cpd00294
datp[c]	Deoxyadenosine-triphosphate	C10H13N5O12P3	C10H13N5O12P3	-3	cytosol	C00131	cpd00115
db4p[c]	3,4-Dihydroxy-2-butanone-4-phosphate	C4H8O6P	C4H8O6P	-1	cytosol	C15556	cpd11225
dcamp[c]	adenylo-succinate	C14H15N5O11P	C14H15N5O11P	-3	cytosol	C03794	cpd02375
dccoa[c]	Decanoyl-CoA-(n-C10:0CoA)	C31H51N7O17P3S	C31H51N7O17P3S	-3	cytosol	C05274	cpd03128
dcdp[c]	2'-Deoxycytidine-5'-diphosphate	C9H13N3O10P2	C9H13N3O10P2	-2	cytosol	C00705	cpd00533
dcmp[c]	2'-Deoxycytidine-5'-monophosphate	C9H13N3O7P	C9H13N3O7P	-1	cytosol	C00239	cpd00206
dctp[c]	2'-Deoxycytidine-5'-triphosphate	C9H13N3O13P3	C9H13N3O13P3	-3	cytosol	C00458	cpd00356
dcyt[c]	2'-Deoxycytidine	C9H13N3O4	C9H13N3O4	0	cytosol	C00881	cpd00654
ddcaACP[c]	Dodecanoyl-[acyl-carrier-protein]	C23H43N2O8PRS	C23H43N2O8PRS	-1	cytosol	C05223	cpd11468
ddcoa[c]	Dodecanoyl-CoA-(n-C12:0CoA)	C33H55N7O17P3S	C33H55N7O17P3S	-3	cytosol	C01832	cpd01260
decACP[c]	Decanoyl-[acp]	C21H39N2O8PRS	C21H39N2O8PRS	-1	cytosol	C05755	cpd11474
dgdp[c]	2'-Deoxyguanosine-5'-diphosphate	C10H13N5O10P2	C10H13N5O10P2	-2	cytosol	C00361	cpd00008
dgmp[c]	Deoxyguanosine-monophosphate	C10H13N5O7P	C10H13N5O7P	-1	cytosol	C00362	cpd00018
dgsn[c]	2'-Deoxyguanosine	C10H13N5O4	C10H13N5O4	0	cytosol	C00330	cpd00182
dgtp[c]	Deoxyguanosine-triphosphate	C10H13N5O13P3	C10H13N5O13P3	-3	cytosol	C00286	cpd00002
dha[c]	1,3-Dihydroxypropan-2-one	C3H6O3	C3H6O3	0	cytosol	C00184	cpd00157
dhap[c]	dihydroxy-acetone-phosphate	C3H7O6P	C3H6O6P	-1	cytosol	C00111	cpd00095
dhf[c]	7-8-Dihydrofolate	C19H19N7O6	C19H19N7O6	-2	cytosol	C00415	cpd00330
dhlpro[c]	Dihydrolipoylprotein	CH3RS2	CH3RS2	0	cytosol	C02972	cpd12225
dhna[c]	1-4-Dihydroxy-2-naphthoate	C11H7O4	C11H7O4	-1	cytosol	C03657	cpd02295
dhnpt[c]	dihydro-neo-pterin	C9H13N5O4	C9H13N5O4	0	cytosol	C04874	cpd02961
dhor-S[c]	S-Dihydroorotate	C5H5N2O4	C5H5N2O4	-1	cytosol	C00337	cpd00282
dhpt[c]	7,8-Dihydropteroate	C14H13N6O3	C14H13N6O3	-1	cytosol	C00921	cpd00683
dimp[c]	2'-Deoxyinosine 5'-phosphate	C10H12N4O7P	C10H12N4O7P	-1	cytosol	C06196	cpd03704
ditp[c]	2'-Deoxyinosine-5'-triphosphate	C10H12N4O13P3	C10H12N4O13P3	-3	cytosol	C01345	cpd00977
dmbzid[c]	5,6-Dimethylbenzimidazole	C9H10N2	C9H10N2	0	cytosol	C03114	cpd01997
dmlz[c]	6-7-Dimethyl-8-1-D-ribityllumazine	C13H18N4O6	C13H18N4O6	0	cytosol	C04332	cpd02656
dmpp[c]	Dimethylallyldiphosphate	C5H10O7P2	C5H10O7P2	-2	cytosol	C00235	cpd00113
dnad[c]	Deamido-NAD	C21H24N6O15P2	C21H24N6O15P2	-2	cytosol	C00857	cpd00638
dpcoa[c]	Dephospho-CoA	C21H33N7O13P2S	C21H33N7O13P2S	-2	cytosol	C00882	cpd00655
dscl[c]	Dihydrosirohydrochlorin	C42H40N4O16	C42H40N4O16	-8	cytosol	C02463	cpd01620
dtdp[c]	Deoxythymidine-5'-diphosphate	C10H14N2O11P2	C10H14N2O11P2	-2	cytosol	C00363	cpd00297
dtdp4d6dg[c]	dTDP-4-dehydro-6-deoxy-D-galactose	C16H22N2O15P2	C16H22N2O15P2	-2	cytosol	C11907	cpd00521
dtdp4d6dm[c]	dTDP-4-oxo-L-rhamnose	C16H22N2O15P2	C16H22N2O15P2	-2	cytosol	C00688	cpd00521
dtdpglu[c]	dTDP-alpha-D-glucose	C16H24N2O16P2	C16H24N2O16P2	-2	cytosol	C00842	cpd00626
dtdprmn[c]	dTDP-rhamnose	C16H24N2O15P2	C16H24N2O15P2	-2	cytosol	C03319	cpd02113
dtmp[c]	Thymidylate	C10H14N2O8P	C10H14N2O8P	-1	cytosol	C00364	cpd00298
dttp[c]	Deoxythymidine triphosphate	C10H14N2O14P3	C10H14N2O14P3	-3	cytosol	C00459	cpd00357
dudp[c]	2'-Deoxyuridine-5'-diphosphate	C9H12N2O11P2	C9H12N2O11P2	-2	cytosol	C01346	cpd00978
dump[c]	2'-Deoxyuridine-5'-phosphate	C9H12N2O8P	C9H12N2O8P	-1	cytosol	C00365	cpd00299
duri[c]	2'-Deoxyuridine	C9H12N2O5	C9H12N2O5	0	cytosol	C00526	cpd00412
dutp[c]	2'-Deoxyuridine-5'-triphosphate	C9H12N2O14P3	C9H12N2O14P3	-3	cytosol	C00460	cpd00358
dxyl5p[c]	1-deoxy-D-xylulose5-phosphate	C5H10O7P	C5H10O7P	-1	cytosol	C11437	cpd00509
e4hglu[c]	L-erythro-4-Hydroxyglutamate	C5H8NO5	C5H8NO5	-1	cytosol	C03079,C05947	cpd01974
e4p[c]	D-Erythrose4-phosphate	C4H8O7P	C4H8O7P	-1	cytosol	C00279	cpd00236
eig3p[c]	d-erythro-imidazole-glycerol-phosphate	C6H10N2O6P	C6H10N2O6P	-1	cytosol	C04666	cpd02843
eths[c]	ethanesulfonate	C2H5O3S	C2H5O3S	-1	cytosol	None	cpd11579
eths[e]	ethanesulfonate	C2H5O3S	C2H5O3S	-1	extracellular	None	cpd11579
f1p[c]	fructose-1-phosphate	C6H12O9P	C6H12O9P	-1	cytosol	C01094,C02976	cpd00072
f6p[c]	D-fructose-6-phosphate	C6H12O9P	C6H12O9P	-1	cytosol	C05345,C00085	cpd00072
fa1[c]	Fatty acid (Iso-C14:0)	C14H27O2	C14H27O2	-1	cytosol	None	cpd03847
fa11[c]	Fatty acid (Iso-C17:0)	C17H33O2	C17H33O2	-1	cytosol	None	cpd11431
fa11coa[c]	Iso-C17:0 CoA Isoheptadecanoyl-CoA	C38H65N7O17P3S	C38H65N7O17P3S	-3	cytosol	None	cpd11432
fa12[c]	Fatty acid (Anteiso-C17:0)	C17H33O2	C17H33O2	-1	cytosol	None	cpd11431
fa12coa[c]	Anteiso-C17:0 CoA Anteisoheptadecanoyl-CoA	C38H65N7O17P3S	C38H65N7O17P3S	-3	cytosol	None	cpd11432
fa1coa[c]	Iso-C14:0 CoA Isotetradecanoyl-CoA	C35H59N7O17P3S	C35H59N7O17P3S	-3	cytosol	None	cpd01695
fa3[c]	Fatty acid (Iso-C15:0)	C15H29O2	C15H29O2	-1	cytosol	None	cpd11436
fa3coa[c]	Iso-C15:0 CoA Isopentadecanoyl-CoA	C36H61N7O17P3S	C36H61N7O17P3S	-3	cytosol	None	cpd11437
fa4[c]	Fatty acid (Anteiso-C15:0)	C15H29O2	C15H29O2	-1	cytosol	None	cpd11436
fa4coa[c]	Anteiso-C15:0 CoA Anteisopentadecanoyl-CoA	C36H61N7O17P3S	C36H61N7O17P3S	-3	cytosol	None	cpd11437
fa6[c]	Fatty acid (iso-C16:0)	C16H31O2	C16H31O2	-1	cytosol	None	cpd00214
fa6coa[c]	Iso-C16:0 CoA Isohexadecanoyl-CoA	C37H63N7O17P3S	C37H63N7O17P3S	-3	cytosol	None	cpd00134
fad[c]	Flavinadeninedinucleotideoxidized	C27H33N9O15P2	C27H31N9O15P2	-2	cytosol	C00016	cpd00015
fdp[c]	D-Fructose1-6-bisphosphate	C6H12O12P2	C6H12O12P2	-2	cytosol	C00354,C05378	cpd00290
fdxox[c]	Oxidized-ferredoxin	Fe2R4S6	Fe2R4S6	4	cytosol	C00139	cpd11620
fdxrd[c]	Reduced-ferredoxin	Fe2R4S6	Fe2R4S6	4	cytosol	C00138	cpd11620
fe2[c]	Iron(2+)	Fe	Fe	2	cytosol	C14818	cpd10515
fe2[e]	Iron(2+)	Fe	Fe	2	extracellular	C14818	cpd10515
fe3[c]	Iron(3+)	Fe	Fe	2	cytosol	C14819	cpd10515
fe3[e]	Iron(3+)	Fe	Fe	2	extracellular	C14819	cpd10515
fgam[c]	5'-phosphoribosylformylglycinamide	C8H14N2O9P	C8H14N2O9P	-1	cytosol	C04376	cpd02678
fmn[c]	Flavin-mononucleotide	C17H21N4O9P	C17H20N4O9P	-1	cytosol	C00061	cpd00050
fol[c]	Folate	C19H17N7O6	C19H17N7O6	-2	cytosol	C00504	cpd00393
for[c]	Formate	CH2O2	CHO2	-1	cytosol	C00058	cpd00047
for[e]	Formate	CH2O2	CHO2	-1	extracellular	C00058	cpd00047
fpram[c]	2-Formamido-N1-(5-phospho-D-ribosyl)acetamidine	C8H16N3O8P	C8H16N3O8P	0	cytosol	C04640	cpd02826
fprica[c]	5-Formamido-1--5-phospho-D-ribosylimidazole-4-carboxamide	C10H14N4O9P	C10H14N4O9P	-1	cytosol	C04734	cpd02884
frdp[c]	trans,-trans-farnesyl diphosphate	C15H26O7P2	C15H26O7P2	-2	cytosol	C00448	cpd00350
fru[c]	D-Fructose	C6H12O6	C6H12O6	0	cytosol	C10906,C01496,C00095,C02336	cpd00027
fru[e]	D-Fructose	C6H12O6	C6H12O6	0	extracellular	C10906,C01496,C00095,C02336	cpd00027
fruur[c]	D-Fructuronic-acid	C6H9O7	C6H9O7	-1	cytosol	C00905	cpd00672
fum[c]	trans-Butenedioic-acid	C4H2O4	C4H2O4	-2	cytosol	C00122	cpd00106
g1p[c]	D-Glucose1-phosphate	C6H13O9P	C6H12O9P	-1	cytosol	C00103	cpd00072
g3p[c]	Glyceraldehyde-3-phosphate	C3H7O6P	C3H6O6P	-1	cytosol	C00118	cpd00095
g6p[c]	glucose-6-phosphate	C6H12O9P	C6H12O9P	-1	cytosol	C00668,C00092	cpd00072
g6p-B[c]	beta-D-Glucose-6-phosphate	C6H12O9P	C6H12O9P	-1	cytosol	C01172	cpd00072
gal1p[c]	alpha-D-galactose-1-phosphate	C6H12O9P	C6H12O9P	-1	cytosol	C00446,C03384	cpd00072
galctr-D[c]	D-Galactaric-acid	C6H8O8	C6H8O8	-2	cytosol	C00879	cpd00609
galctr-D[e]	D-Galactaric-acid	C6H8O8	C6H8O8	-2	extracellular	C00879	cpd00609
gam1p[c]	D-Glucosamine1-phosphate	C6H14NO8P	C6H14NO8P	0	cytosol	C06156	cpd00288
gam6p[c]	d-glucosamine-6-phosphate	C6H14NO8P	C6H14NO8P	0	cytosol	C00352	cpd00288
gar[c]	N1-5-Phospho-D-ribosylglycinamide	C7H15N2O8P	C7H15N2O8P	0	cytosol	C03838	cpd02394
gcald[c]	Hydroxyacetaldehyde	C2H4O2	C2H4O2	0	cytosol	C00266	cpd00229
gdp[c]	Guanosine-diphosphate	C10H15N5O11P2	C10H13N5O11P2	-2	cytosol	C00035	cpd00031
gdpmann[c]	GDP-D-mannose	C16H25N5O16P2	C16H23N5O16P2	-2	cytosol	C00096	cpd00083
gdptp[c]	Guanosine-5'-triphosphate,3'-diphosphate	C10H13N5O20P5	C10H13N5O20P5	-5	cytosol	C04494	cpd02740
ggdp[c]	all-trans-Geranylgeranyl-pyrophosphate	C20H34O7P2	C20H34O7P2	-2	cytosol	C00353	cpd00289
glc-D[c]	Glucose	C6H12O6	C6H12O6	0	cytosol	C00267,C00293,C00031	cpd00027
glc-D[e]	Glucose	C6H12O6	C6H12O6	0	extracellular	C00267,C00293,C00031	cpd00027
glcr[c]	D-Glucosaccharic-acid	C6H8O8	C6H8O8	-2	cytosol	C00818	cpd00609
glcr[e]	D-Glucosaccharic-acid	C6H8O8	C6H8O8	-2	extracellular	C00818	cpd00609
gln-L[c]	L-Glutamine	C5H10N2O3	C5H10N2O3	0	cytosol	C00064	cpd00053
gln-L[e]	L-Glutamine	C5H10N2O3	C5H10N2O3	0	extracellular	C00064	cpd00053
glu1sa[c]	L-Glutamate1-semialdehyde	C5H9NO3	C5H9NO3	0	cytosol	C03741	cpd00338
glu5p[c]	L-gamma-glutamyl-5-phosphate	C5H9NO7P	C5H9NO7P	-1	cytosol	C03287	cpd02097
glu5sa[c]	L-glutamate-gamma-semialdehyde	C5H9NO3	C5H9NO3	0	cytosol	C01165	cpd00338
glu-D[c]	D-2-Aminoglutaric-acid	C5H8NO4	C5H8NO4	-1	cytosol	C00217	cpd00023
glu-L[c]	L-Glutamate	C5H9NO4	C5H8NO4	-1	cytosol	C00025	cpd00023
glutrna[c]	L-Glutamyl-tRNA(Glu)	C15H19N6O6R	C15H19N6O6R	0	cytosol	C02987	cpd12227
glx[c]	Glyoxylic acid	C2H2O3	C2HO3	-1	cytosol	C00048	cpd00040
gly[c]	Glycine	C2H5NO2	C2H5NO2	0	cytosol	C00037	cpd00033
glyc[c]	Glycerol	C3H8O3	C3H8O3	0	cytosol	C00116	cpd00100
glyc3p[c]	L-Glycerol-1-phosphate	C3H8O6P	C3H8O6P	-1	cytosol	C00623,C00093	cpd00080
glyc3p[e]	L-Glycerol-1-phosphate	C3H8O6P	C3H8O6P	-1	extracellular	C00623,C00093	cpd00080
glyclt[c]	Hydroxyacetic-acid	C2H3O3	C2H3O3	-1	cytosol	C00160	cpd00139
glyclt[e]	Hydroxyacetic-acid	C2H3O3	C2H3O3	-1	extracellular	C00160	cpd00139
glycogen[c]	Glycogen	C30H52O26	C30H52O26	0	cytosol	C00182	cpd00155
glyc-R[c]	Glyceric-acid	C3H5O4	C3H5O4	-1	cytosol	C00258	cpd00223
gmp[c]	Guanylic-acid	C10H13N5O8P	C10H13N5O8P	-1	cytosol	C00144	cpd00126
grdp[c]	Geranyldiphosphate	C10H18O7P2	C10H18O7P2	-2	cytosol	C00341	cpd00283
gtca1_45_MT[c]	glycerol teichoic acid (n=45), unlinked, unsubstituted	C151H300N2O240P46	C151H300N2O240P46	-46	cytosol	None	cpd11442
gtca2_45_MT[c]	glycerol teichoic acid (n=45), unlinked, D-ala substituted	C286H523N47O284P46	C286H523N47O284P46	-46	cytosol	None	cpd11443
gtca3_45_MT[c]	glycerol teichoic acid (n=45), unlinked, glucose substituted	C421H748N2O464P46	C421H748N2O464P46	-46	cytosol	None	cpd11444
gtp[c]	Guanosine-5'-triphosphate	C10H16N5O14P3	C10H13N5O14P3	-3	cytosol	C00044	cpd00038
gua[c]	GNN	C5H5N5O	C5H5N5O	0	cytosol	C00242	cpd00207
h[c]	Proton	H+	H	1	cytosol	C00080	cpd00067
h[e]	Proton	H+	H	1	extracellular	C00080	cpd00067
h2[c]	Hydrogen	H2	H2	0	cytosol	C00282	cpd11640
h2[e]	Hydrogen	H2	H2	0	extracellular	C00282	cpd11640
h2mb4p[c]	1-hydroxy-2-methyl-2-E-butenyl4-diphosphate	C5H10O8P2	C5H10O8P2	-2	cytosol	C11811	cpd08615
h2o[c]	Water	H2O	H2O	0	cytosol	C00001	cpd00001
h2o[e]	Water	H2O	H2O	0	extracellular	C00001	cpd00001
h2o2[c]	Hydrogenperoxide	H2O2	H2O2	0	cytosol	C00027	cpd00025
h2s[c]	Hydrogen Sulfide	H2S	H2S	0	cytosol	C00297,C00283	cpd00239
h2s[e]	Hydrogen Sulfide	H2S	H2S	0	cytosol	C00297,C00283	cpd00239
hcit[c]	(R)-2-Hydroxybutane-1,2,4-tricarboxylate	C7H7O7	C7H7O7	-3	cytosol	C01251	cpd00919
hco3[c]	Bicarbonate	CHO3	CHO3	-1	cytosol	C01353,C00288	cpd00242
hcys-L[c]	L-2-Amino-4-mercaptobutyric-acid	C4H9NO2S	C4H9NO2S	0	cytosol	C05330,C00155	cpd00135
hdca[c]	Hexadecanoate-(n-C16:0)	C16H31O2	C16H31O2	-1	cytosol	C00249	cpd00214
hdcea[c]	hexadecenoate	C16H29O2	C16H29O2	-1	cytosol	None	cpd15237
hdcoa[c]	Hexadecenoyl-CoA	C37H61N7O17P3S	C37H61N7O17P3S	-3	cytosol	None	cpd15238
hdeACP[c]	Hexadecenoyl-ACP	C27H49N2O8PRS	C27H49N2O8PRS	-1	cytosol	None	cpd11477
hexACP[c]	Hexanoyl-[acp]	C17H31N2O8PRS	C17H31N2O8PRS	-1	cytosol	C05749	cpd11472
hexs[c]	hexanesulfonate	C6H13O3S	C6H13O3S	-1	cytosol	None	cpd11578
hexs[e]	hexanesulfonate	C6H13O3S	C6H13O3S	-1	extracellular	None	cpd11578
hg2[c]	Mercuric-ion	Hg	Hg	2	cytosol	C00703	cpd00531
hg2[e]	Mercuric-ion	Hg	Hg	2	extracellular	C00703	cpd00531
hgbam[c]	Hydrogenobyrinic-acid a,c-diamide	C45H58N6O12	C45H58N6O12	-4	cytosol	C06503	cpd03913
hgbyr[c]	Hydrogenobyrinic-acid	C45H54N4O14	C45H54N4O14	-6	cytosol	C06399	cpd03832
his-L[c]	L-Histidine	C6H9N3O2	C6H9N3O2	0	cytosol	C00135	cpd00119
hisp[c]	L-histidinol-phosphate	C6H12N3O4P	C6H12N3O4P	0	cytosol	C01100	cpd00807
histd[c]	L-Histidinol	C6H12N3O	C6H12N3O	1	cytosol	C00860	cpd00641
hmbil[c]	Hydroxymethylbilane	C40H38N4O17	C40H38N4O17	-8	cytosol	C01024	cpd00755
hom-L[c]	2-Amino-4-hydroxybutyric-acid	C4H9NO3	C4H9NO3	0	cytosol	C00263	cpd00161
hxan[c]	Hypoxanthine	C5H4N4O	C5H4N4O	0	cytosol	C00262	cpd00226
hxan[e]	Hypoxanthine	C5H4N4O	C5H4N4O	0	extracellular	C00262	cpd00226
hxcoa[c]	Hexanoyl-CoA	C27H43N7O17P3S	C27H43N7O17P3S	-3	cytosol	C05270	cpd03124
ibcoa[c]	Isobutyryl-CoA	C25H39N7O17P3S	C25H39N7O17P3S	-3	cytosol	C00630	cpd00120
ichor[c]	Isochorismic-acid	C10H8O6	C10H8O6	-2	cytosol	C00885	cpd00216
icit[c]	1-Hydroxypropane-1,2,3-tricarboxylic-acid	C6H5O7	C6H5O7	-3	cytosol	C00311	cpd00137
idp[c]	Inosine-diphosphate	C10H14N4O11P2	C10H12N4O11P2	-2	cytosol	C00104	cpd00090
ile-L[c]	L-Isoleucine	C6H13NO2	C6H13NO2	0	cytosol	C00407	cpd00107
ile-L[e]	L-Isoleucine	C6H13NO2	C6H13NO2	0	extracellular	C00407	cpd00107
imacp[c]	imidazole-acetol-phosphate	C6H8N2O5P	C6H8N2O5P	-1	cytosol	C01267	cpd00930
imp[c]	Inosine monophosphate	C10H12N4O8P	C10H12N4O8P	-1	cytosol	C00130	cpd00114
ipdp[c]	Isopentenyldiphosphate	C5H10O7P2	C5H10O7P2	-2	cytosol	C00129	cpd00113
istnt[c]	Isethionate	C2H5O4S	C2H5O4S	-1	cytosol	C05123	cpd03048
istnt[e]	Isethionate	C2H5O4S	C2H5O4S	-1	extracellular	C05123	cpd03048
itp[c]	Inosine-tripolyphosphate	C10H15N4O14P3	C10H12N4O14P3	-3	cytosol	C00081	cpd00068
ivcoa[c]	Isovaleryl-CoA	C26H41N7O17P3S	C26H41N7O17P3S	-3	cytosol	C02939	cpd00760
k[c]	Potassium	K	K	1	cytosol	C00238	cpd00205
k[e]	Potassium	K	K	1	extracellular	C00238	cpd00205
lac-L[c]	Lactate	C3H5O3	C3H5O3	-1	cytosol	C00186	cpd00159
lac-L[e]	Lactate	C3H5O3	C3H5O3	-1	extracellular	C00186	cpd00159
Lcyst[c]	2-Amino-3-sulfopropionic-acid	C3H6NO5S	C3H6NO5S	-1	cytosol	C00506	cpd00395
Lcyst[e]	2-Amino-3-sulfopropionic-acid	C3H6NO5S	C3H6NO5S	-1	extracellular	C00506	cpd00395
leu-L[c]	L-Leucine	C6H13NO2	C6H13NO2	0	cytosol	C00123	cpd00107
leu-L[e]	L-Leucine	C6H13NO2	C6H13NO2	0	extracellular	C00123	cpd00107
lipo1_24_MT[c]	lipoteichoic acid (n=24), linked, glucose substituted	C26236H47072O25500P2400	C26236H47072O25500P2400	-2400	cytosol	None	cpd11445
lipo2_24_MT[c]	lipoteichoic acid (n=24), linked, N-acetyl-D-glucosamine	C31036H54272N2400O25500P2400	C31036H54272N2400O25500P2400	-2400	cytosol	None	cpd11446
lipo3_24_MT[c]	lipoteichoic acid (n=24), linked, D-alanine substituted	C19036H39872N2400O18300P2400	C19036H39872N2400O18300P2400	-2400	cytosol	None	cpd11447
lipo4_24_MT[c]	lipoteichoic acid (n=24), linked, unsubstituted	C11836H23072O13500P2400	C11836H23072O13500P2400	-2400	cytosol	None	cpd11448
lpro[c]	Lipoylprotein	CHRS2	CHRS2	0	cytosol	C02051	cpd12005
lys-L[c]	Lysine	C6H14N2O2	C6H15N2O2	1	cytosol	C00047	cpd00039
lys-L[e]	Lysine	C6H14N2O2	C6H15N2O2	1	extracellular	C00047	cpd00039
lysylpgly_MT[c]	lysylphophatidylglycerol	C4336H8572N200O1100P100	C4336H8572N200O1100P100	0	cytosol	None	cpd11449
m12dg_MT[c]	monoglucosyl-1,2 diacylglycerol	C4036H7672O1000	C4036H7672O1000	0	cytosol	None	cpd11450
malACP[c]	Malonyl-[acyl-carrier-protein]	C14H22N2O10PRS	C14H22N2O10PRS	-2	cytosol	C01209	cpd11492
malcoa[c]	Malonyl-coenzyme A	C24H38N7O19P3S	C24H34N7O19P3S	-4	cytosol	C00083	cpd00070
mal-L[c]	2-Hydroxybutanedioic-acid	C4H4O5	C4H4O5	-2	cytosol	C00711,C00149	cpd00130
malt[c]	1-alpha-D-Glucopyranosyl-4-alpha-D-glucopyranose	C12H22O11	C12H22O11	0	cytosol	C00208	cpd00179
malthp[c]	Maltoheptaose	C42H72O36	C42H72O36	0	cytosol	C06216	cpd15494
malthx[c]	Maltohexaose	C36H62O31	C36H62O31	0	cytosol	C01936	cpd01329
maltpt[c]	Maltopentaose	C30H52O26	C30H52O26	0	cytosol	C06218	cpd00155
malttr[c]	Amylotriose	C18H32O16	C18H32O16	0	cytosol	C01835	cpd01262
maltttr[c]	Maltotetraose	C24H42O21	C24H42O21	0	cytosol	C02052	cpd01399
man1p[c]	D-Mannose1-phosphate	C6H12O9P	C6H12O9P	-1	cytosol	C00636	cpd00072
man6p[c]	D-mannose-6-phosphate	C6H12O9P	C6H12O9P	-1	cytosol	C00275	cpd00072
mana[c]	D-Mannonate	C6H11O7	C6H11O7	-1	cytosol	C00514	cpd00403
met-D[c]	D-2-Amino-4-(methylthio)butyric-acid	C5H11NO2S	C5H11NO2S	0	cytosol	C00855	cpd00060
met-D[e]	D-2-Amino-4-(methylthio)butyric-acid	C5H11NO2S	C5H11NO2S	0	extracellular	C00855	cpd00060
methf[c]	5-10-Methenyltetrahydrofolate	C20H20N7O6	C20H20N7O6	-1	cytosol	C00445	cpd00347
met-L[c]	L-Methionine	C5H11NO2S	C5H11NO2S	0	cytosol	C00073	cpd00060
met-L[e]	L-Methionine	C5H11NO2S	C5H11NO2S	0	extracellular	C00073	cpd00060
metox[c]	L-Methionine-S-oxide	C5H11NO3S	C5H11NO3S	0	cytosol	C02989	cpd01914
metox[e]	L-Methionine-S-oxide	C5H11NO3S	C5H11NO3S	0	extracellular	C02989	cpd01914
metox-R[c]	L-methionine-R-oxide	C5H11NO3S	C5H11NO3S	0	cytosol	None	cpd01914
metox-R[e]	L-methionine-R-oxide	C5H11NO3S	C5H11NO3S	0	extracellular	None	cpd01914
mg2[c]	Magnesium	Mg	Mg	2	cytosol	C00305	cpd00254
mg2[e]	Magnesium	Mg	Mg	2	extracellular	C00305	cpd00254
mlthf[c]	5-10-Methylenetetrahydrofolate	C20H21N7O6	C20H21N7O6	-2	cytosol	C00143	cpd00125
mn2[c]	Manganese	Mn2+	Mn	2	cytosol	C00034	cpd00030
mn2[e]	Manganese	Mn2+	Mn	2	extracellular	C00034	cpd00030
mobd[c]	Molybdate-H2MoO4	H2MoO4	H2MoO4	0	cytosol	C06232	cpd11574
mobd[e]	Molybdate-H2MoO4	H2MoO4	H2MoO4	0	extracellular	C06232	cpd11574
mops[c]	3-(N-morpholino)propanesulfonate	C7H14NO4S	C7H14NO4S	-1	cytosol	None	cpd11575
mops[e]	3-(N-morpholino)propanesulfonate	C7H14NO4S	C7H14NO4S	-1	extracellular	None	cpd11575
mql8[c]	Menaquinol-8	C51H74O2	C51H74O2	0	cytosol	C05819	cpd15499
mqn8[c]	Menaquinone-8	C51H72O2	C51H72O2	0	cytosol	C00828	cpd15500
mso3[c]	methanesulfonate	CH3O3S	CH3O3S	-1	cytosol	C11145	cpd08023
mso3[e]	methanesulfonate	CH3O3S	CH3O3S	-1	extracellular	C11145	cpd08023
mthgxl[c]	2-Oxopropanal	C3H4O2	C3H4O2	0	cytosol	C00546	cpd00428
myrsACP[c]	Tetradecanoyl-[acp]	C25H47N2O8PRS	C25H47N2O8PRS	-1	cytosol	C05761	cpd11466
n2[c]	Nitrogen	N2	N2	0	cytosol	C00697	cpd00528
na1[c]	Sodium	Na	Na	1	cytosol	C01330	cpd00971
na1[e]	Sodium	Na	Na	1	extracellular	C01330	cpd00971
nac[c]	Nicotinate	C6H5NO2	C6H4NO2	-1	cytosol	C00253	cpd00218
nac[e]	Nicotinate	C6H5NO2	C6H4NO2	-1	extracellular	C00253	cpd00218
nad[c]	Nicotinamideadeninedinucleotide	C21H27N7O14P2	C21H26N7O14P2	-1	cytosol	C00003	cpd00003
nadh[c]	Nicotinamideadeninedinucleotide-reduced	C21H29N7O14P2	C21H27N7O14P2	-2	cytosol	C00004	cpd00004
nadp[c]	Nicotinamideadeninedinucleotidephosphate	C21H28N7O17P3	C21H26N7O17P3	-2	cytosol	C00006	cpd00006
nadph[c]	Nicotinamideadeninedinucleotidephosphate-reduced	C21H30N7O17P3	C21H27N7O17P3	-3	cytosol	C00005	cpd00005
ncam[c]	Nicotinamide	C6H6N2O	C6H6N2O	0	cytosol	C00153	cpd00133
nh4[c]	Ammonium	H4N	H4N	1	cytosol	C01342,C00014	cpd00013
nh4[e]	Ammonium	H4N	H4N	1	extracellular	C01342,C00014	cpd00013
nicrnt[c]	NicotinateD-ribonucleotide	C11H13NO9P	C11H13NO9P	-1	cytosol	C01185	cpd00873
no2[c]	Nitrite	HNO2	NO2	-1	cytosol	C00088	cpd00075
o2[c]	dioxygen	O2	O2	0	cytosol	C00007	cpd00007
oaa[c]	keto-Oxaloacetate	C4H4O5	C4H2O5	-2	cytosol	C00036	cpd00032
occoa[c]	Octanoyl-CoA-(n-C8:0CoA)	C29H47N7O17P3S	C29H47N7O17P3S	-3	cytosol	C01944	cpd01335
ocdca[c]	octadecanoate	C18H35O2	C18H35O2	-1	cytosol	C01530	cpd01080
ocdcaACP[c]	Octadecanoyl-ACP	C29H55N2O8PRS	C29H55N2O8PRS	-1	cytosol	None	cpd11573
ocdcea[c]	octadecenoate	C18H33O2	C18H33O2	-1	cytosol	None	cpd15269
octACP[c]	Octanoyl-[acp]	C19H35N2O8PRS	C19H35N2O8PRS	-1	cytosol	C05752	cpd11470
octdp[c]	all-trans-Octaprenyldiphosphate	C40H66O7P2	C40H66O7P2	-2	cytosol	C04146	cpd02557
octeACP[c]	Oleoyl-[acyl-carrier-protein]	C29H53N2O8PRS	C29H53N2O8PRS	-1	cytosol	C01203	cpd11572
odecoa[c]	Octadecenoyl-CoA	C39H65N7O17P3S	C39H65N7O17P3S	-3	cytosol	None	cpd15274
orn[c]	2,5-Diaminopentanoate	C5H12N2O2	C5H13N2O2	1	cytosol	C00077	cpd00064
orot[c]	Uracil-6-carboxylic-acid	C5H3N2O4	C5H3N2O4	-1	cytosol	C00295	cpd00247
orot5p[c]	orotidine-5'-phosphate	C10H11N2O11P	C10H11N2O11P	-2	cytosol	C01103	cpd00810
pa120[c]	1,2-didodecanoyl-sn-glycerol-3-phosphate	C27H52O8P	C27H52O8P	-1	cytosol	None	cpd15521
pa140[c]	1,2-ditetradecanoyl-sn-glycerol-3-phosphate	C31H60O8P	C31H60O8P	-1	cytosol	None	cpd15522
pa141[c]	1,2-ditetradec-7-enoyl-sn-glycerol-3-phosphate	C31H56O8P	C31H56O8P	-1	cytosol	None	cpd15523
pa160[c]	1,2-dihexadecanoyl-sn-glycerol-3-phosphate	C35H68O8P	C35H68O8P	-1	cytosol	None	cpd15524
pa161[c]	1,2-dihexadec-9-enoyl-sn-glycerol-3-phosphate	C35H64O8P	C35H64O8P	-1	cytosol	None	cpd15525
pa180[c]	1,2-dioctadecanoyl-sn-glycerol-3-phosphate	C39H76O8P	C39H76O8P	-1	cytosol	None	cpd15526
pa181[c]	1,2-dioctadec-11-enoyl-sn-glycerol-3-phosphate	C39H72O8P	C39H72O8P	-1	cytosol	None	cpd15527
palmACP[c]	Palmitoyl-ACP	C27H51N2O8PRS	C27H51N2O8PRS	-1	cytosol	None	cpd11476
pan4p[c]	Pantetheine4-phosphate	C11H22N2O7PS	C11H22N2O7PS	-1	cytosol	C01134	cpd00834
pant-R[c]	R-Pantoate	C6H11O4	C6H11O4	-1	cytosol	C00522	cpd00408
pap[c]	Adenosine3-5-bisphosphate	C10H15N5O10P2	C10H13N5O10P2	-2	cytosol	C00054	cpd00008
Pb[c]	Lead	Pb	Pb	2	cytosol	C06696	cpd04097
Pb[e]	Lead	Pb	Pb	2	extracellular	C06696	cpd04097
pep[c]	Phosphoenolpyruvate	C3H5O6P	C3H3O6P	-2	cytosol	C00074	cpd00061
peptido_MT[c]	Peptidoglycan subunit	C40H62N8O21	C40H62N8O21	-2	cytosol	None	cpd11452
pgly_MT[c]	phosphatidylglycerol	C3736H7272O1000P100	C3736H7272O1000P100	-100	cytosol	None	cpd11453
pglyp_MT[c]	Phosphatidylglycerophosphate	C8H12O13P2R2	C8H12O13P2R2	-2	cytosol	C03892	cpd11454
pgp120[c]	Phosphatidylglycerophosphate-didodecanoyl	C30H58O13P2	C30H58O13P2	-2	cytosol	None	cpd15542
pgp140[c]	Phosphatidylglycerophosphate-ditetradecanoyl	C34H66O13P2	C34H66O13P2	-2	cytosol	None	cpd15543
pgp141[c]	Phosphatidylglycerophosphate-ditetradec-7-enoyl	C34H62O13P2	C34H62O13P2	-2	cytosol	None	cpd15544
pgp160[c]	Phosphatidylglycerophosphate-dihexadecanoyl	C38H74O13P2	C38H74O13P2	-2	cytosol	None	cpd15545
pgp161[c]	Phosphatidylglycerophosphate-dihexadec-9-enoyl	C38H70O13P2	C38H70O13P2	-2	cytosol	None	cpd15546
pgp180[c]	Phosphatidylglycerophosphate-dioctadecanoyl	C42H82O13P2	C42H82O13P2	-2	cytosol	None	cpd15547
pgp181[c]	Phosphatidylglycerophosphate-dioctadec-11-enoyl	C42H78O13P2	C42H78O13P2	-2	cytosol	None	cpd15548
phe-L[c]	L-Phenylalanine	C9H11NO2	C9H11NO2	0	cytosol	C00079	cpd00066
phom[c]	O-Phospho-L-homoserine	C4H9NO6P	C4H9NO6P	-1	cytosol	C01102	cpd00809
phpyr[c]	3-Phenyl-2-oxopropanoate	C9H7O3	C9H7O3	-1	cytosol	C00166	cpd00143
phthr[c]	4-(Phosphonooxy)-L-threonine	C4H9NO7P	C4H9NO7P	-1	cytosol	C06055	cpd03607
pi[c]	Orthophosphoric-acid	HO6P	HO4P	-2	cytosol	C00009	cpd00009
pi[e]	Orthophosphoric-acid	HO6P	HO4P	-2	extracellular	C00009	cpd00009
pmtcoa[c]	Palmitoyl-CoA-(n-C16:0CoA)	C37H63N7O17P3S	C37H63N7O17P3S	-3	cytosol	C00154	cpd00134
pnto-R[c]	Pantothenic acid	C9H16NO5	C9H16NO5	-1	cytosol	C00864	cpd00644
ppa[c]	Propionate-(n-C3:0)	C3H5O2	C3H5O2	-1	cytosol	C00163	cpd00141
ppap[c]	Propionyl-phosphate	C3H6O5P	C3H6O5P	-1	cytosol	C02876	cpd01844
ppbng[c]	Porphobilinogen	C10H13N2O4	C10H13N2O4	-1	cytosol	C00931	cpd00689
ppcoa[c]	Propionyl-coenzyme A	C24H40N7O17P3S	C24H37N7O17P3S	-3	cytosol	C00100	cpd00086
pphn[c]	prephenate-tyr	C10H8O6	C10H8O6	-2	cytosol	C00254	cpd00216
ppi[c]	Pyrophosphate	H4O7P2	H2O7P2	-2	cytosol	C00013	cpd00012
ppi[e]	Pyrophosphate	H4O7P2	H2O7P2	-2	extracellular	C00013	cpd00012
pppg9[c]	ProtoporphyrinogenIX	C34H38N4O4	C34H38N4O4	-2	cytosol	C01079	cpd00791
pppi[c]	Tripolyphosphate	HO10P3	HO10P3	-4	cytosol	C00536	cpd00421
pram[c]	5-Phosphoribosyl-1-amine	C5H12NO7P	C5H12NO7P	0	cytosol	C03090	cpd01982
pran[c]	N-(5-phospho-beta-D-ribosyl)-anthranilate	C12H14NO9P	C12H14NO9P	-2	cytosol	C04302	cpd00956
prbamp[c]	1-(5-phospho-D-ribosyl)-AMP	C15H21N5O14P2	C15H21N5O14P2	-2	cytosol	C02741	cpd00251
prbatp[c]	1-(5-phospho-D-ribosyl)-ATP	C15H21N5O20P4	C15H21N5O20P4	-4	cytosol	C02739	cpd01775
pre3a[c]	Precorrin-3 A	C43H44N4O16	C43H44N4O16	-6	cytosol	C05772	cpd03420
pre3b[c]	Precorrin-3B	C43H44N4O17	C43H44N4O17	-6	cytosol	C06406	cpd03833
pre4[c]	Precorrin-4	C44H45N4O17	C44H45N4O17	-7	cytosol	C06407	cpd03834
pre5[c]	Precorrin-5	C45H47N4O17	C45H47N4O17	-7	cytosol	C06416	cpd03839
pre6a[c]	Precorrin-6A	C44H47N4O16	C44H47N4O16	-7	cytosol	C06320	cpd03761
pre6b[c]	Precorrin-6B	C44H49N4O16	C44H49N4O16	-7	cytosol	C06319	cpd03760
pre8[c]	Precorrin-8	C45H53N4O14	C45H53N4O14	-7	cytosol	C06408	cpd03835
prfp[c]	N-(5'-phospho-D-ribosylformimino)-5-amino-1-(5''-phosphoribosyl)-4-imidazolecarboxamide	C15H23N5O15P2	C15H23N5O15P2	-2	cytosol	C04896	cpd02979
prlp[c]	N-(5'-phospho-D-1'-ribulosylformimino)-5-amino-1-(5''-phosphoribosyl)-4-imidazolecarboxamide	C15H23N5O15P2	C15H23N5O15P2	-2	cytosol	C04916	cpd02979
pro-L[c]	L-Proline	C5H8NO2	C5H8NO2	-1	cytosol	C00148	cpd00129
pro-L[e]	L-Proline	C5H8NO2	C5H8NO2	-1	extracellular	C00148	cpd00129
prpp[c]	5-phosphoribosyl-1-pyrophosphate	C5H13O14P3	C5H10O14P3	-3	cytosol	C00119	cpd00103
ps_MT[c]	phosphatidylserine	C8H10NO10PR2	C8H10NO10PR2	-2	cytosol	C02737	cpd11455
psd5p[c]	Pseudouridine-5'-phosphate	C9H12N2O9P	C9H12N2O9P	-1	cytosol	C01168	cpd00091
pser-L[c]	3-phospho-serine	C3H7NO6P	C3H7NO6P	-1	cytosol	C01005	cpd00738
psetha_MT[c]	phosphatidylethanolamine	C7H11NO8PR2	C7H11NO8PR2	-1	cytosol	C00350	cpd11456
ptrc[c]	Putrescine	C4H14N2	C4H14N2	2	cytosol	C00134	cpd00118
pyr[c]	Pyroracemic-acid	C3H4O3	C3H3O3	-1	cytosol	C00022	cpd00020
quln[c]	2,3-Pyridinedicarboxylic-acid	C7H3NO4	C7H3NO4	-2	cytosol	C03722	cpd02333
r1p[c]	D-ribose-1-phosphate	C5H10O8P	C5H10O8P	-1	cytosol	C00620	cpd00101
r5p[c]	ribose-5-phosphate	C5H10O8P	C5H10O8P	-1	cytosol	C03736,C00117	cpd00101
rdmbzi[c]	N1-(alpha-D-ribosyl)-5,6-dimethylbenzimidazole	C14H18N2O4	C14H18N2O4	0	cytosol	C05775	cpd03423
rib-D[c]	D-Ribose	C5H10O5	C5H10O5	0	cytosol	C00121	cpd00105
rib-D[e]	D-Ribose	C5H10O5	C5H10O5	0	extracellular	C00121	cpd00105
ribflv[c]	Riboflavin	C17H20N4O6	C17H20N4O6	0	cytosol	C00255	cpd00220
ru5p-D[c]	D-Ribulose5-phosphate	C5H10O8P	C5H10O8P	-1	cytosol	C00199	cpd00101
s17bp[c]	Sedoheptulose-1,7-bisphosphate	C7H14O13P2	C7H14O13P2	-2	cytosol	C00447	cpd00349
s7p[c]	sedoheptulose-7-phosphate	C7H14O10P	C7H14O10P	-1	cytosol	C05382	cpd00238
sbt-D[c]	Sorbitol	C6H14O6	C6H14O6	0	cytosol	C00794	cpd00588
sbzcoa[c]	Succinylbenzoyl-CoA	C32H40N7O20P3S	C32H40N7O20P3S	-4	cytosol	C03160	cpd02021
seln[c]	Hydrogen-selenide	H2Se	H2Se	0	cytosol	C01528	cpd01078
selnp[c]	Selenophosphate	HO3PSe	HO3PSe	-2	cytosol	C05172	cpd03078
ser-L[c]	L-Serine	C3H7NO3	C3H7NO3	0	cytosol	C00716,C00065	cpd00054
shcl[c]	Sirohydrochlorin	C42H38N4O16	C42H38N4O16	-8	cytosol	C05778	cpd03426
sheme[c]	Siroheme	C42H36FeN4O16	C42H36FeN4O16	-8	cytosol	C00748	cpd00557
skm[c]	3,4,5-Trihydroxy-1-cyclohexenecarboxylic-acid	C7H9O5	C7H9O5	-1	cytosol	C00493	cpd00383
skm5p[c]	shikimate-3-phosphate	C7H9O8P	C7H9O8P	-2	cytosol	C03175	cpd02030
sl26da[c]	N-Succinyl-LL-2,6-diaminoheptanedioate	C11H16N2O7	C11H16N2O7	-2	cytosol	C04421	cpd02698
sl2a6o[c]	N-Succinyl-2-L-amino-6-oxoheptanedioate	C11H12NO8	C11H12NO8	-3	cytosol	C04462	cpd02724
so3[c]	Sulfite	H2O3S	HO3S	-1	cytosol	C00094	cpd00081
so4[c]	Sulfate	H2O4S	O4S	-2	cytosol	C00059	cpd00048
so4[e]	Sulfate	H2O4S	O4S	-2	extracellular	C00059	cpd00048
spmd[c]	N-(3-Aminopropyl)-1,4-butane-diamine	C7H22N3	C7H22N3	3	cytosol	C00315	cpd00264
spmd[e]	N-(3-Aminopropyl)-1,4-butane-diamine	C7H22N3	C7H22N3	3	extracellular	C00315	cpd00264
stcoa[c]	Stearoyl-CoA-(n-C18:0CoA)	C39H67N7O17P3S	C39H67N7O17P3S	-3	cytosol	C00412	cpd00327
sucbz[c]	Succinylbenzoate	C11H8O5	C11H8O5	-2	cytosol	C02730	cpd01772
succ[c]	Ethylenesuccinic-acid	C4H6O4	C4H4O4	-2	cytosol	C00042	cpd00036
succoa[c]	Succinyl-coenzyme A	C25H40N7O19P3S	C25H36N7O19P3S	-4	cytosol	C00091	cpd00078
suchms[c]	O-Succinyl-L-homoserine	C8H12NO6	C8H12NO6	-1	cytosol	C01118	cpd00822
sula[c]	Sulfoacetic-acid	C2H2O5S	C2H2O5S	-2	cytosol	C14179	cpd09878
sula[e]	Sulfoacetic-acid	C2H2O5S	C2H2O5S	-2	extracellular	C14179	cpd09878
t12dg_MT[c]	triglucosyl-1,2 diacylglycerol	C5236H9672O2000	C5236H9672O2000	0	cytosol	None	cpd11458
tag6p-D[c]	D-Tagatose-6-phosphate	C6H12O9P	C6H12O9P	-1	cytosol	C01097	cpd00072
tagdp-D[c]	D-Tagatose-1,6-biphosphate	C6H12O12P2	C6H12O12P2	-2	cytosol	C03785	cpd00290
tartr-L[c]	L-tartarate	C4H4O6	C4H4O6	-2	cytosol	C00898,C02107	cpd00666
taur[c]	Aminoethylsulfonic-acid	C2H7NO3S	C2H7NO3S	0	cytosol	C00245	cpd00210
taur[e]	Aminoethylsulfonic-acid	C2H7NO3S	C2H7NO3S	0	extracellular	C00245	cpd00210
tcam_MT[c]	minor teichoic acid (acetylgalactosamine glucose phosphate n=30)	C420H692N30O391P30	C420H692N30O391P30	-30	cytosol	None	cpd11459
tdcoa[c]	Tetradecanoyl-CoA-(n-C14:0CoA)	C35H59N7O17P3S	C35H59N7O17P3S	-3	cytosol	C02593	cpd01695
12dgr141[c]	1,2-Diacyl-sn-glycerol-ditetradec-7-enoyl	C31H56O5	C31H56O5	0	cytosol	None	cpd15308
tdeACP[c]	Tetradecenoyl-ACP	C25H45N2O8PRS	C25H45N2O8PRS	-1	cytosol	None	cpd11467
teich_45_MT[c]	teichuronic acid (GlcA + GalNac, 45 repeating unit)	C630H945N45O630P45	C630H945N45O630P45	-45	cytosol	None	cpd15634
thdp[c]	tetrahydrodipicolinate	C7H7NO4	C7H7NO4	-2	cytosol	C03972	cpd02465
thf[c]	5-6-7-8-Tetrahydrofolate	C19H23N7O6	C19H21N7O6	-2	cytosol	C00101	cpd00087
thfglu[c]	THF-L-glutamate	C24H27N8O9	C24H27N8O9	-3	cytosol	C03541,C09332	cpd06227
thmmp[c]	thiamine-phosphate	C12H17N4O4PS	C12H17N4O4PS	0	cytosol	C01081	cpd00793
thmpp[c]	Thiaminediphosphate	C12H18N4O7P2S	C12H17N4O7P2S	-1	cytosol	C00068	cpd00056
thr-L[c]	L-Threonine	C4H9NO3	C4H9NO3	0	cytosol	C00188	cpd00161
thrp[c]	L-Threonine-phosphate	C4H9NO6P	C4H9NO6P	-1	cytosol	C12147	cpd00809
thym[c]	5-Methyluracil	C5H6N2O2	C5H6N2O2	0	cytosol	C00178	cpd00151
tmrs2eACP[c]	trans-Tetradec-2-enoyl-[acp]	C25H45N2O8PRS	C25H45N2O8PRS	-1	cytosol	C05760	cpd11467
tpalm2eACP[c]	trans-Hexadec-2-enoyl-[acp]	C27H49N2O8PRS	C27H49N2O8PRS	-1	cytosol	C05763	cpd11477
trdox[c]	Oxidized thioredoxin	C6H7NO2R2S2	C6H7NO2R2S2	0	cytosol	C00343	cpd11420
trdrd[c]	Reduced thioredoxin	C6H9NO2R2S2	C6H9NO2R2S2	0	cytosol	C00342	cpd11421
tre[c]	Trehalose	C12H22O11	C12H22O11	0	cytosol	C01083	cpd00179
tre6p[c]	D-trehalose-6-phosphate	C12H22O14P	C12H22O14P	-1	cytosol	C00689	cpd00523
trnaglu[c]	tRNA(Glu)	C10H12N5O3R	C10H12N5O3R	0	cytosol	C01641	cpd11912
trp-L[c]	L-Tryptophan	C11H12N2O2	C11H12N2O2	0	cytosol	C00078	cpd00065
tsul[c]	H2S2O3	O3S2	O3S2	-2	cytosol	C05529,C00320	cpd00268
ttdca[c]	tetradecanoate-(n-C14:0)	C14H27O2	C14H27O2	-1	cytosol	C06424	cpd03847
tyr-L[c]	L-Tyrosine	C9H11NO3	C9H11NO3	0	cytosol	C00082	cpd00069
uaagmda[c]	Undecaprenyl-diphospho-N-acetylmuramoyl-N-acetylglucosamine-L-ala-D-glu-meso-2-6-diaminopimeloyl-D-ala-D-ala	C95H152N8O28P2	C95H152N8O28P2	-4	cytosol	C05898	cpd03495
uaccg[c]	UDP-N-acetyl-3-O-1-carboxyvinyl-D-glucosamine	C20H26N3O19P2	C20H26N3O19P2	-3	cytosol	C04631	cpd02820
uacgam[c]	UDP-N-acetylglucosamine	C17H27N3O17P2	C17H25N3O17P2	-2	cytosol	C00043	cpd00037
uacmam[c]	UDP-N-acetyl-D-mannosamine	C17H25N3O17P2	C17H25N3O17P2	-2	cytosol	C01170	cpd00861
uagmda[c]	Undecaprenyl-diphospho-N-acetylmuramoyl-L-alanyl-D-glutamyl-meso-2-6-diaminopimeloyl-D-alanyl-D-alanine	C87H139N7O23P2	C87H139N7O23P2	-4	cytosol	C05897	cpd03494
uama[c]	UDP-N-acetylmuramoyl-L-alanine	C23H33N4O20P2	C23H33N4O20P2	-3	cytosol	C01212	cpd00890
uamag[c]	UDP-N-acetylmuramoyl-L-alanyl-D-glutamate	C28H39N5O23P2	C28H39N5O23P2	-4	cytosol	C00692	cpd00525
uamr[c]	UDP-N-acetylmuramic acid	C20H28N3O19P2	C20H28N3O19P2	-3	cytosol	C01050	cpd00773
udcpdp[c]	Bactoprenyl-diphosphate	C55H90O7P2	C55H90O7P2	-2	cytosol	C04574	cpd02229
udcpp[c]	Undecaprenylphosphate	C55H90O4P	C55H90O4P	-1	cytosol	C17556,C00348	cpd00286
udp[c]	Uridine-5'-diphosphate	C9H14N2O12P2	C9H12N2O12P2	-2	cytosol	C00015	cpd00014
udpacgal[c]	UDP-N-acetyl-D-galactosamine	C17H25N3O17P2	C17H25N3O17P2	-2	cytosol	C00203	cpd00037
udpg[c]	UDP-alpha-D-glucose	C15H24N2O17P2	C15H22N2O17P2	-2	cytosol	C00029	cpd00026
udpgal[c]	UDPgalactose	C15H24N2O17P2	C15H22N2O17P2	-2	cytosol	C00052	cpd00026
udpglcur[c]	UDP-D-glucuronate	C15H19N2O18P2	C15H19N2O18P2	-3	cytosol	C00167	cpd00144
ugmd[c]	UDP-N-acetylmuramoyl-L-alanyl-D-gamma-glutamyl-meso-2-6-diaminopimelate	C35H51N7O26P2	C35H51N7O26P2	-4	cytosol	C04877	cpd02964
ugmda[c]	UDP-N-acetylmuramoyl-L-alanyl-D-glutamyl-meso-2-6-diaminopimeloyl-D-alanyl-D-alanine	C41H61N9O28P2	C41H61N9O28P2	-4	cytosol	C04882	cpd02968
ump[c]	5'Uridylic-acid	C9H13N2O9P	C9H12N2O9P	-1	cytosol	C00105	cpd00091
unaga[c]	Undecaprenyl-diphospho N-acetyl-glucosamine	C63H103NO12P2	C63H103NO12P2	-2	cytosol	C01289	cpd00946
uppg3[c]	uroporphyrinogen-iii	C40H36N4O16	C40H36N4O16	-8	cytosol	C01051	cpd00774
ura[c]	Uracil	C4H4N2O2	C4H4N2O2	0	cytosol	C00106	cpd00092
urate[c]	Uric-acid	C5H4N4O3	C5H4N4O3	0	cytosol	C00366	cpd00300
urea[c]	Carbamide	CH4N2O	CH4N2O	0	cytosol	C00086	cpd00073
urea[e]	Carbamide	CH4N2O	CH4N2O	0	extracellular	C00086	cpd00073
uri[c]	Uridine	C9H12N2O6	C9H12N2O6	0	cytosol	C00299	cpd00249
utp[c]	Uridine-triphosphate	C9H15N2O15P3	C9H12N2O15P3	-3	cytosol	C00075	cpd00062
val-L[c]	L-Valine	C5H11NO2	C5H11NO2	0	cytosol	C00183	cpd00156
val-L[e]	L-Valine	C5H11NO2	C5H11NO2	0	extracellular	C00183	cpd00156
xan[c]	Xanthene	C5H4N4O2	C5H4N4O2	0	cytosol	C00385	cpd00309
xan[e]	Xanthene	C5H4N4O2	C5H4N4O2	0	extracellular	C00385	cpd00309
xmp[c]	xanthosine-5-phosphate	C10H12N4O9P	C10H12N4O9P	-1	cytosol	C00655	cpd00497
xtp[c]	XTP	C10H12N4O15P3	C10H12N4O15P3	-3	cytosol	C00700	cpd00530
xu5p-D[c]	D-xylulose-5-phosphate	C5H10O8P	C5H10O8P	-1	cytosol	C00231	cpd00101
xyl-D[c]	Xylose	C5H10O5	C5H10O5	0	cytosol	C01394,C00181	cpd00105
xyl-D[e]	Xylose	C5H10O5	C5H10O5	0	extracellular	C01394,C00181	cpd00105
xylu-D[c]	D-Lyxulose	C5H10O5	C5H10O5	0	cytosol	C00310	cpd00105
zn2[c]	Zinc	Zn2+	Zn	2	cytosol	C00038	cpd00034
zn2[e]	Zinc	Zn2+	Zn	2	extracellular	C00038	cpd00034
5doxa[c]	5'-deoxyadenosine	C10H13N5O3	C10H13N5O3	0	cytosol	C05198	cpd03091
dtbt[c]	Dethiobiotin	C10H18N2O3	C10H17N2O3	-1	cytosol	C01909	cpd01311
pydx5p[c]	Pyridoxal 5'-phosphate	C8H10NO6P	C8H9NO6P	-1	cytosol	C00018	cpd00016
cfesp[c]	Corrinoid iron-sulfur protein	C19CoN4R21	C19CoN4R21	0	cytosol	C06021	cpd12810
mcfesp[c]	Methylcorrinoid iron-sulfur protein	C20H3CoN4R21	C20H3CoN4R21	0	cytosol	C06020	cpd12809
o2s[c]	Superoxide anion	HO2	HO2	0	cytosol	C00704	cpd00532
meoh[c]	Methanol	CH4O	CH4O	0	cytosol	C00132	cpd00116
meoh[e]	Methanol	CH4O	CH4O	0	extracellular	C00132	cpd00116
no2[e]	Nitrite	NO2	NO2	-1	extracellular	C00088	cpd00075
no3[e]	Nitrate	NO3	NO3	-1	extracellular	C00244	cpd00209
no3[c]	Nitrate	NO3	NO3	-1	cytosol	C00244	cpd00209
pad[c]	2-Phenylacetamide	C8H9NO	C8H9NO	0	cytosol	C02505	cpd01647
pac[c]	Phenyl acetate	C8H8O2	C8H8O2	0	cytosol	C07086,C05613,C15583,C00548	cpd00430
iad[c]	Indole-3-acetamide	C10H10N2O	C10H10N2O	0	cytosol	C02693	cpd01747
ind3ac[c]	Indoleacetic-acid	C10H8NO2	C10H8NO2	-1	cytosol	C00954	cpd00703
ad[c]	Acetamide	C2H5NO	C2H5NO	0	cytosol	C06244	cpd03734
aa[c]	Acrylamide	C3H5NO	C3H5NO	0	cytosol	C01659	cpd01150
acryl[c]	Acrylate	C3H3O2	C3H3O2	-1	cytosol	C00511	cpd00400
indole[c]	indol	C8H7N	C8H7N	0	cytosol	C00463	cpd00359
glyald[c]	D-Glyceraldehyde	C3H6O3	C3H6O3	0	cytosol	C00577	cpd00448
hpyr[c]	3-Hydroxypyruvic-acid	C3H3O4	C3H3O4	-1	cytosol	C00168	cpd00145
acon-C[c]	cis-Aconitic-acid	C6H3O6	C6H3O6	-3	cytosol	C00417	cpd00331
dmso[c]	Dimethyl sulfoxide	C2H6OS	C2H6OS	0	cytosol	C11143	cpd08021
dms[c]	Methyl-thioether	C2H6S	C2H6S	0	cytosol	C00580	cpd00450
tmao[c]	Trimethylamine N-oxide	C3H9NO	C3H9NO	0	cytosol	C01104	cpd00811
tma[c]	N,N-Dimethylmethanamine	C3H10N	C3H10N	1	cytosol	C00565	cpd00441

## Sheet: Table S5
Table S5. Constraints of M. thermoacetica metabolic model (iAI558) used for growth simulations
Growth on glucose				Growth on fructose				Growth on xylose				Growth on H2 & CO2				Growth on CO				Growth on methanol
Reaction	Formula	Flux		Reaction	Formula	Flux		Reaction	Formula	Flux		Reaction	Formula	Flux		Reaction	Formula	Flux		Reaction	Formula	Flux
BIO_MT	55 h2o[c] + 55 atp[c] + 0.2795 glu-L[c] + 0.0006 nadph[c] + 0.1469 gln-L[c] + 0.0133 amp[c] + 0.0291 utp[c] + 0.0925 met-L[c] + 0.1807 ser-L[c] + 0.0006 gdp[c] + 0.0369 gtp[c] + 0.0015 gmp[c] + 0.187 asp-L[c] + 0.4288 ala-L[c] + 0.1785 lys-L[c] + 0.0029 cmp[c] + 0.0007 cdp[c] + 0.284 arg-L[c] + 0.0368 ctp[c] + 0.126 asn-L[c] + 0.0468 trp-L[c] + 0.1417 phe-L[c] + 0.1257 tyr-L[c] + 0.0439 cys-L[c] …	0.115933		BIO_MT	55 h2o[c] + 55 atp[c] + 0.2795 glu-L[c] + 0.0006 nadph[c] + 0.1469 gln-L[c] + 0.0133 amp[c] + 0.0291 utp[c] + 0.0925 met-L[c] + 0.1807 ser-L[c] + 0.0006 gdp[c] + 0.0369 gtp[c] + 0.0015 gmp[c] + 0.187 asp-L[c] + 0.4288 ala-L[c] + 0.1785 lys-L[c] + 0.0029 cmp[c] + 0.0007 cdp[c] + 0.284 arg-L[c] + 0.0368 ctp[c] + 0.126 asn-L[c] + 0.0468 trp-L[c] + 0.1417 phe-L[c] + 0.1257 tyr-L[c] + 0.0439 cys-L[c] …	0.135676		BIO_MT	55 h2o[c] + 55 atp[c] + 0.2795 glu-L[c] + 0.0006 nadph[c] + 0.1469 gln-L[c] + 0.0133 amp[c] + 0.0291 utp[c] + 0.0925 met-L[c] + 0.1807 ser-L[c] + 0.0006 gdp[c] + 0.0369 gtp[c] + 0.0015 gmp[c] + 0.187 asp-L[c] + 0.4288 ala-L[c] + 0.1785 lys-L[c] + 0.0029 cmp[c] + 0.0007 cdp[c] + 0.284 arg-L[c] + 0.0368 ctp[c] + 0.126 asn-L[c] + 0.0468 trp-L[c] + 0.1417 phe-L[c] + 0.1257 tyr-L[c] + 0.0439 cys-L[c] …	0.0805579		BIO_MT	55 h2o[c] + 55 atp[c] + 0.2795 glu-L[c] + 0.0006 nadph[c] + 0.1469 gln-L[c] + 0.0133 amp[c] + 0.0291 utp[c] + 0.0925 met-L[c] + 0.1807 ser-L[c] + 0.0006 gdp[c] + 0.0369 gtp[c] + 0.0015 gmp[c] + 0.187 asp-L[c] + 0.4288 ala-L[c] + 0.1785 lys-L[c] + 0.0029 cmp[c] + 0.0007 cdp[c] + 0.284 arg-L[c] + 0.0368 ctp[c] + 0.126 asn-L[c] + 0.0468 trp-L[c] + 0.1417 phe-L[c] + 0.1257 tyr-L[c] + 0.0439 cys-L[c] …	0.026952		BIO_MT	55 h2o[c] + 55 atp[c] + 0.2795 glu-L[c] + 0.0006 nadph[c] + 0.1469 gln-L[c] + 0.0133 amp[c] + 0.0291 utp[c] + 0.0925 met-L[c] + 0.1807 ser-L[c] + 0.0006 gdp[c] + 0.0369 gtp[c] + 0.0015 gmp[c] + 0.187 asp-L[c] + 0.4288 ala-L[c] + 0.1785 lys-L[c] + 0.0029 cmp[c] + 0.0007 cdp[c] + 0.284 arg-L[c] + 0.0368 ctp[c] + 0.126 asn-L[c] + 0.0468 trp-L[c] + 0.1417 phe-L[c] + 0.1257 tyr-L[c] + 0.0439 cys-L[c] …	0.069555		BIO_MT	55 h2o[c] + 55 atp[c] + 0.2795 glu-L[c] + 0.0006 nadph[c] + 0.1469 gln-L[c] + 0.0133 amp[c] + 0.0291 utp[c] + 0.0925 met-L[c] + 0.1807 ser-L[c] + 0.0006 gdp[c] + 0.0369 gtp[c] + 0.0015 gmp[c] + 0.187 asp-L[c] + 0.4288 ala-L[c] + 0.1785 lys-L[c] + 0.0029 cmp[c] + 0.0007 cdp[c] + 0.284 arg-L[c] + 0.0368 ctp[c] + 0.126 asn-L[c] + 0.0468 trp-L[c] + 0.1417 phe-L[c] + 0.1257 tyr-L[c] + 0.0439 cys-L[c] …	0.0168025
EX_glc-D(e)	glc-D[e] <=>	-3		EX_glc-D(e)	glc-D[e] <=>	0		EX_glc-D(e)	glc-D[e] <=>	0		EX_glc-D(e)	glc-D[e] <=>	0		EX_glc-D(e)	glc-D[e] <=>	0		EX_glc-D(e)	glc-D[e] <=>	0
EX_fru(e)	fru[e] <=>	0		EX_fru(e)	fru[e] <=>	-3		EX_fru(e)	fru[e] <=>	0		EX_fru(e)	fru[e] <=>	0		EX_fru(e)	fru[e] <=>	0		EX_fru(e)	fru[e] <=>	0
EX_xyl-D(e)	xyl-D[e] <=>	0		EX_xyl-D(e)	xyl-D[e] <=>	0		EX_xyl-D(e)	xyl-D[e] <=>	-3		EX_xyl-D(e)	xyl-D[e] <=>	0		EX_xyl-D(e)	xyl-D[e] <=>	0		EX_xyl-D(e)	xyl-D[e] <=>	0
EX_nac(e)	nac[e] <=>	-0.00573869		EX_nac(e)	nac[e] <=>	-0.00671598		EX_nac(e)	nac[e] <=>	-0.00398762		EX_nac(e)	nac[e] <=>	-0.00133412		EX_nac(e)	nac[e] <=>	-0.00344297		EX_nac(e)	nac[e] <=>	-0.000831725
EX_co2(e)	co2[e] <=>	0		EX_co2(e)	co2[e] <=>	0		EX_co2(e)	co2[e] <=>	0		EX_co2(e)	co2[e] <=>	-4.8788		EX_co2(e)	co2[e] <=>	7.31279		EX_co2(e)	co2[e] <=>	-10.2068
EX_co(e)	co[e] <=>	0		EX_co(e)	co[e] <=>	0		EX_co(e)	co[e] <=>	0		EX_co(e)	co[e] <=>	0		EX_co(e)	co[e] <=>	-14		EX_co(e)	co[e] <=>	0
EX_h2(e)	h2[e] <=>	0		EX_h2(e)	h2[e] <=>	0		EX_h2(e)	h2[e] <=>	0		EX_h2(e)	h2[e] <=>	-10		EX_h2(e)	h2[e] <=>	0		EX_h2(e)	h2[e] <=>	0
EX_meoh(e)	meoh[e] <=>	0		EX_meoh(e)	meoh[e] <=>	0		EX_meoh(e)	meoh[e] <=>	0		EX_meoh(e)	meoh[e] <=>	0		EX_meoh(e)	meoh[e] <=>	0		EX_meoh(e)	meoh[e] <=>	-10
EX_ac(e)	ac[e] <=>	6.64169		EX_ac(e)	ac[e] <=>	6.24008		EX_ac(e)	ac[e] <=>	5.86129		EX_ac(e)	ac[e] <=>	1.89114		EX_ac(e)	ac[e] <=>	1.92872		EX_ac(e)	ac[e] <=>	9.7616
EX_ca2(e)	ca2[e] <=>	-0.000370986		EX_ca2(e)	ca2[e] <=>	-0.000434164		EX_ca2(e)	ca2[e] <=>	-0.000257785		EX_ca2(e)	ca2[e] <=>	-8.62464e-05		EX_ca2(e)	ca2[e] <=>	-0.000222576		EX_ca2(e)	ca2[e] <=>	-5.37681e-05
EX_cd2(e)	cd2[e] <=>	0		EX_cd2(e)	cd2[e] <=>	0		EX_cd2(e)	cd2[e] <=>	0		EX_cd2(e)	cd2[e] <=>	0		EX_cd2(e)	cd2[e] <=>	0		EX_cd2(e)	cd2[e] <=>	0
EX_cl(e)	cl[e] <=>	0		EX_cl(e)	cl[e] <=>	0		EX_cl(e)	cl[e] <=>	0		EX_cl(e)	cl[e] <=>	0		EX_cl(e)	cl[e] <=>	0		EX_cl(e)	cl[e] <=>	0
EX_cobalt2(e)	cobalt2[e] <=>	-0.000115933		EX_cobalt2(e)	cobalt2[e] <=>	-0.000135676		EX_cobalt2(e)	cobalt2[e] <=>	-8.05579e-05		EX_cobalt2(e)	cobalt2[e] <=>	-2.6952e-05		EX_cobalt2(e)	cobalt2[e] <=>	-6.9555e-05		EX_cobalt2(e)	cobalt2[e] <=>	-1.68025e-05
EX_cu2(e)	cu2[e] <=>	0		EX_cu2(e)	cu2[e] <=>	0		EX_cu2(e)	cu2[e] <=>	0		EX_cu2(e)	cu2[e] <=>	0		EX_cu2(e)	cu2[e] <=>	0		EX_cu2(e)	cu2[e] <=>	0
EX_fe2(e)	fe2[e] <=>	0		EX_fe2(e)	fe2[e] <=>	0		EX_fe2(e)	fe2[e] <=>	0		EX_fe2(e)	fe2[e] <=>	0		EX_fe2(e)	fe2[e] <=>	0		EX_fe2(e)	fe2[e] <=>	0
EX_fe3(e)	fe3[e] <=>	-0.000394173		EX_fe3(e)	fe3[e] <=>	-0.000461299		EX_fe3(e)	fe3[e] <=>	-0.000273897		EX_fe3(e)	fe3[e] <=>	-9.16368e-05		EX_fe3(e)	fe3[e] <=>	-0.000236487		EX_fe3(e)	fe3[e] <=>	-5.71286e-05
EX_h(e)	h[e] <=>	15.13		EX_h(e)	h[e] <=>	8.82273		EX_h(e)	h[e] <=>	10.0057		EX_h(e)	h[e] <=>	0		EX_h(e)	h[e] <=>	0		EX_h(e)	h[e] <=>	0
EX_h2o(e)	h2o[e] <=>	2.64363		EX_h2o(e)	h2o[e] <=>	3.09383		EX_h2o(e)	h2o[e] <=>	1.83697		EX_h2o(e)	h2o[e] <=>	5.49338		EX_h2o(e)	h2o[e] <=>	-5.72672		EX_h2o(e)	h2o[e] <=>	10.5899
EX_h2s(e)	h2s[e] <=>	-0.0164422		EX_h2s(e)	h2s[e] <=>	-0.0192422		EX_h2s(e)	h2s[e] <=>	-0.0114251		EX_h2s(e)	h2s[e] <=>	-0.00382245		EX_h2s(e)	h2s[e] <=>	-0.0098646		EX_h2s(e)	h2s[e] <=>	-0.00238301
EX_hg2(e)	hg2[e] <=>	0		EX_hg2(e)	hg2[e] <=>	0		EX_hg2(e)	hg2[e] <=>	0		EX_hg2(e)	hg2[e] <=>	0		EX_hg2(e)	hg2[e] <=>	0		EX_hg2(e)	hg2[e] <=>	0
EX_k(e)	k[e] <=>	-0.0818836		EX_k(e)	k[e] <=>	-0.0958281		EX_k(e)	k[e] <=>	-0.0568981		EX_k(e)	k[e] <=>	-0.0190362		EX_k(e)	k[e] <=>	-0.0491267		EX_k(e)	k[e] <=>	-0.0118676
EX_mg2(e)	mg2[e] <=>	-0.0117904		EX_mg2(e)	mg2[e] <=>	-0.0137983		EX_mg2(e)	mg2[e] <=>	-0.00819274		EX_mg2(e)	mg2[e] <=>	-0.00274102		EX_mg2(e)	mg2[e] <=>	-0.00707374		EX_mg2(e)	mg2[e] <=>	-0.00170882
EX_mn2(e)	mn2[e] <=>	0		EX_mn2(e)	mn2[e] <=>	0		EX_mn2(e)	mn2[e] <=>	0		EX_mn2(e)	mn2[e] <=>	0		EX_mn2(e)	mn2[e] <=>	0		EX_mn2(e)	mn2[e] <=>	0
EX_mobd(e)	mobd[e] <=>	0		EX_mobd(e)	mobd[e] <=>	0		EX_mobd(e)	mobd[e] <=>	0		EX_mobd(e)	mobd[e] <=>	0		EX_mobd(e)	mobd[e] <=>	0		EX_mobd(e)	mobd[e] <=>	0
EX_mops(e)	mops[e] <=>	0		EX_mops(e)	mops[e] <=>	0		EX_mops(e)	mops[e] <=>	0		EX_mops(e)	mops[e] <=>	0		EX_mops(e)	mops[e] <=>	0		EX_mops(e)	mops[e] <=>	0
EX_mso3(e)	mso3[e] <=>	0		EX_mso3(e)	mso3[e] <=>	0		EX_mso3(e)	mso3[e] <=>	0		EX_mso3(e)	mso3[e] <=>	0		EX_mso3(e)	mso3[e] <=>	0		EX_mso3(e)	mso3[e] <=>	0
EX_na1(e)	na1[e] <=>	0		EX_na1(e)	na1[e] <=>	0		EX_na1(e)	na1[e] <=>	0		EX_na1(e)	na1[e] <=>	0		EX_na1(e)	na1[e] <=>	0		EX_na1(e)	na1[e] <=>	0
EX_nh4(e)	nh4[e] <=>	-1.11775		EX_nh4(e)	nh4[e] <=>	-1.30811		EX_nh4(e)	nh4[e] <=>	-0.776689		EX_nh4(e)	nh4[e] <=>	-0.259854		EX_nh4(e)	nh4[e] <=>	-0.670605		EX_nh4(e)	nh4[e] <=>	-0.161999
EX_no2(e)	no2[e] <=>	0		EX_no2(e)	no2[e] <=>	0		EX_no2(e)	no2[e] <=>	0		EX_no2(e)	no2[e] <=>	0		EX_no2(e)	no2[e] <=>	0		EX_no2(e)	no2[e] <=>	0
EX_no3(e)	no3[e] <=>	0		EX_no3(e)	no3[e] <=>	0		EX_no3(e)	no3[e] <=>	0		EX_no3(e)	no3[e] <=>	0		EX_no3(e)	no3[e] <=>	0		EX_no3(e)	no3[e] <=>	0
EX_pb2(e)	Pb[e] <=>	0		EX_pb2(e)	Pb[e] <=>	0		EX_pb2(e)	Pb[e] <=>	0		EX_pb2(e)	Pb[e] <=>	0		EX_pb2(e)	Pb[e] <=>	0		EX_pb2(e)	Pb[e] <=>	0
EX_pi(e)	pi[e] <=>	-0.246992		EX_pi(e)	pi[e] <=>	-0.289055		EX_pi(e)	pi[e] <=>	-0.171626		EX_pi(e)	pi[e] <=>	-0.0574205		EX_pi(e)	pi[e] <=>	-0.148185		EX_pi(e)	pi[e] <=>	-0.0357973
EX_ppi(e)	ppi[e] <=>	0		EX_ppi(e)	ppi[e] <=>	0		EX_ppi(e)	ppi[e] <=>	0		EX_ppi(e)	ppi[e] <=>	0		EX_ppi(e)	ppi[e] <=>	0		EX_ppi(e)	ppi[e] <=>	0
EX_so4(e)	so4[e] <=>	0		EX_so4(e)	so4[e] <=>	0		EX_so4(e)	so4[e] <=>	0		EX_so4(e)	so4[e] <=>	0		EX_so4(e)	so4[e] <=>	0		EX_so4(e)	so4[e] <=>	0
EX_zn2(e)	zn2[e] <=>	0		EX_zn2(e)	zn2[e] <=>	0		EX_zn2(e)	zn2[e] <=>	0		EX_zn2(e)	zn2[e] <=>	0		EX_zn2(e)	zn2[e] <=>	0		EX_zn2(e)	zn2[e] <=>	0
EX_btn(e)	btn[e] <=>	0		EX_btn(e)	btn[e] <=>	0		EX_btn(e)	btn[e] <=>	0		EX_btn(e)	btn[e] <=>	0		EX_btn(e)	btn[e] <=>	0		EX_btn(e)	btn[e] <=>	0
EX_buts(e)	buts[e] <=>	0		EX_buts(e)	buts[e] <=>	0		EX_buts(e)	buts[e] <=>	0		EX_buts(e)	buts[e] <=>	0		EX_buts(e)	buts[e] <=>	0		EX_buts(e)	buts[e] <=>	0
EX_eths(e)	eths[e] <=>	0		EX_eths(e)	eths[e] <=>	0		EX_eths(e)	eths[e] <=>	0		EX_eths(e)	eths[e] <=>	0		EX_eths(e)	eths[e] <=>	0		EX_eths(e)	eths[e] <=>	0
EX_cbl1(e)	cbl1[e] <=>	0		EX_cbl1(e)	cbl1[e] <=>	0		EX_cbl1(e)	cbl1[e] <=>	0		EX_cbl1(e)	cbl1[e] <=>	0		EX_cbl1(e)	cbl1[e] <=>	0		EX_cbl1(e)	cbl1[e] <=>	0
EX_cbl2(e)	cbl2[e] <=>	0		EX_cbl2(e)	cbl2[e] <=>	0		EX_cbl2(e)	cbl2[e] <=>	0		EX_cbl2(e)	cbl2[e] <=>	0		EX_cbl2(e)	cbl2[e] <=>	0		EX_cbl2(e)	cbl2[e] <=>	0
EX_cbl3(e)	cbl3[e] <=>	0		EX_cbl3(e)	cbl3[e] <=>	0		EX_cbl3(e)	cbl3[e] <=>	0		EX_cbl3(e)	cbl3[e] <=>	0		EX_cbl3(e)	cbl3[e] <=>	0		EX_cbl3(e)	cbl3[e] <=>	0
EX_galctr-D(e)	galctr-D[e] <=>	0		EX_galctr-D(e)	galctr-D[e] <=>	0		EX_galctr-D(e)	galctr-D[e] <=>	0		EX_galctr-D(e)	galctr-D[e] <=>	0		EX_galctr-D(e)	galctr-D[e] <=>	0		EX_galctr-D(e)	galctr-D[e] <=>	0
EX_glcr(e)	glcr[e] <=>	0		EX_glcr(e)	glcr[e] <=>	0		EX_glcr(e)	glcr[e] <=>	0		EX_glcr(e)	glcr[e] <=>	0		EX_glcr(e)	glcr[e] <=>	0		EX_glcr(e)	glcr[e] <=>	0
EX_glyc3p(e)	glyc3p[e] <=>	0		EX_glyc3p(e)	glyc3p[e] <=>	0		EX_glyc3p(e)	glyc3p[e] <=>	0		EX_glyc3p(e)	glyc3p[e] <=>	0		EX_glyc3p(e)	glyc3p[e] <=>	0		EX_glyc3p(e)	glyc3p[e] <=>	0
EX_glyclt(e)	glyclt[e] <=>	0		EX_glyclt(e)	glyclt[e] <=>	0		EX_glyclt(e)	glyclt[e] <=>	0		EX_glyclt(e)	glyclt[e] <=>	0		EX_glyclt(e)	glyclt[e] <=>	0		EX_glyclt(e)	glyclt[e] <=>	0
EX_hexs(e)	hexs[e] <=>	0		EX_hexs(e)	hexs[e] <=>	0		EX_hexs(e)	hexs[e] <=>	0		EX_hexs(e)	hexs[e] <=>	0		EX_hexs(e)	hexs[e] <=>	0		EX_hexs(e)	hexs[e] <=>	0
EX_hxan(e)	hxan[e] <=>	0		EX_hxan(e)	hxan[e] <=>	0		EX_hxan(e)	hxan[e] <=>	0		EX_hxan(e)	hxan[e] <=>	0		EX_hxan(e)	hxan[e] <=>	0		EX_hxan(e)	hxan[e] <=>	0
EX_istnt(e)	istnt[e] <=>	0		EX_istnt(e)	istnt[e] <=>	0		EX_istnt(e)	istnt[e] <=>	0		EX_istnt(e)	istnt[e] <=>	0		EX_istnt(e)	istnt[e] <=>	0		EX_istnt(e)	istnt[e] <=>	0
EX_lac-L(e)	lac-L[e] <=>	0		EX_lac-L(e)	lac-L[e] <=>	0		EX_lac-L(e)	lac-L[e] <=>	0		EX_lac-L(e)	lac-L[e] <=>	0		EX_lac-L(e)	lac-L[e] <=>	0		EX_lac-L(e)	lac-L[e] <=>	0
EX_Lcyst(e)	Lcyst[e] <=>	0		EX_Lcyst(e)	Lcyst[e] <=>	0		EX_Lcyst(e)	Lcyst[e] <=>	0		EX_Lcyst(e)	Lcyst[e] <=>	0		EX_Lcyst(e)	Lcyst[e] <=>	0		EX_Lcyst(e)	Lcyst[e] <=>	0
EX_met-D(e)	met-D[e] <=>	0		EX_met-D(e)	met-D[e] <=>	0		EX_met-D(e)	met-D[e] <=>	0		EX_met-D(e)	met-D[e] <=>	0		EX_met-D(e)	met-D[e] <=>	0		EX_met-D(e)	met-D[e] <=>	0
EX_metox(e)	metox[e] <=>	0		EX_metox(e)	metox[e] <=>	0		EX_metox(e)	metox[e] <=>	0		EX_metox(e)	metox[e] <=>	0		EX_metox(e)	metox[e] <=>	0		EX_metox(e)	metox[e] <=>	0
EX_metox-R(e)	metox-R[e] <=>	0		EX_metox-R(e)	metox-R[e] <=>	0		EX_metox-R(e)	metox-R[e] <=>	0		EX_metox-R(e)	metox-R[e] <=>	0		EX_metox-R(e)	metox-R[e] <=>	0		EX_metox-R(e)	metox-R[e] <=>	0
EX_rib-D(e)	rib-D[e] <=>	0		EX_rib-D(e)	rib-D[e] <=>	0		EX_rib-D(e)	rib-D[e] <=>	0		EX_rib-D(e)	rib-D[e] <=>	0		EX_rib-D(e)	rib-D[e] <=>	0		EX_rib-D(e)	rib-D[e] <=>	0
EX_spmd(e)	spmd[e] <=>	0		EX_spmd(e)	spmd[e] <=>	0		EX_spmd(e)	spmd[e] <=>	0		EX_spmd(e)	spmd[e] <=>	0		EX_spmd(e)	spmd[e] <=>	0		EX_spmd(e)	spmd[e] <=>	0
EX_sula(e)	sula[e] <=>	0		EX_sula(e)	sula[e] <=>	0		EX_sula(e)	sula[e] <=>	0		EX_sula(e)	sula[e] <=>	0		EX_sula(e)	sula[e] <=>	0		EX_sula(e)	sula[e] <=>	0
EX_taur(e)	taur[e] <=>	0		EX_taur(e)	taur[e] <=>	0		EX_taur(e)	taur[e] <=>	0		EX_taur(e)	taur[e] <=>	0		EX_taur(e)	taur[e] <=>	0		EX_taur(e)	taur[e] <=>	0
EX_xan(e)	xan[e] <=>	0		EX_xan(e)	xan[e] <=>	0		EX_xan(e)	xan[e] <=>	0		EX_xan(e)	xan[e] <=>	0		EX_xan(e)	xan[e] <=>	0		EX_xan(e)	xan[e] <=>	0
EX_for(e)	for[e] <=>	0		EX_for(e)	for[e] <=>	0		EX_for(e)	for[e] <=>	0		EX_for(e)	for[e] <=>	0		EX_for(e)	for[e] <=>	0		EX_for(e)	for[e] <=>	0
COt	co[c] <=> co[e]	0		COt	co[c] <=> co[e]	0		COt	co[c] <=> co[e]	0		COt	co[c] <=> co[e]	0		COt	co[c] <=> co[e]	-14		COt	co[c] <=> co[e]	0
MEOHt	meoh[c] <=> meoh[e]	0		MEOHt	meoh[c] <=> meoh[e]	0		MEOHt	meoh[c] <=> meoh[e]	0		MEOHt	meoh[c] <=> meoh[e]	0		MEOHt	meoh[c] <=> meoh[e]	0		MEOHt	meoh[c] <=> meoh[e]	-10
AMALT1	malttr[c] + malt[c] <=> maltttr[c] + glc-D[c]	0		AMALT1	malttr[c] + malt[c] <=> maltttr[c] + glc-D[c]	0		AMALT1	malttr[c] + malt[c] <=> maltttr[c] + glc-D[c]	0		AMALT1	malttr[c] + malt[c] <=> maltttr[c] + glc-D[c]	0		AMALT1	malttr[c] + malt[c] <=> maltttr[c] + glc-D[c]	0		AMALT1	malttr[c] + malt[c] <=> maltttr[c] + glc-D[c]	0
AMALT2	malt[c] + maltttr[c] <=> glc-D[c] + maltpt[c]	0		AMALT2	malt[c] + maltttr[c] <=> glc-D[c] + maltpt[c]	0		AMALT2	malt[c] + maltttr[c] <=> glc-D[c] + maltpt[c]	0		AMALT2	malt[c] + maltttr[c] <=> glc-D[c] + maltpt[c]	0		AMALT2	malt[c] + maltttr[c] <=> glc-D[c] + maltpt[c]	0		AMALT2	malt[c] + maltttr[c] <=> glc-D[c] + maltpt[c]	0
AMALT3	malt[c] + maltpt[c] <=> glc-D[c] + malthx[c]	0		AMALT3	malt[c] + maltpt[c] <=> glc-D[c] + malthx[c]	0		AMALT3	malt[c] + maltpt[c] <=> glc-D[c] + malthx[c]	0		AMALT3	malt[c] + maltpt[c] <=> glc-D[c] + malthx[c]	0		AMALT3	malt[c] + maltpt[c] <=> glc-D[c] + malthx[c]	0		AMALT3	malt[c] + maltpt[c] <=> glc-D[c] + malthx[c]	0
AMALT4	malt[c] + malthx[c] <=> glc-D[c] + malthp[c]	0		AMALT4	malt[c] + malthx[c] <=> glc-D[c] + malthp[c]	0		AMALT4	malt[c] + malthx[c] <=> glc-D[c] + malthp[c]	0		AMALT4	malt[c] + malthx[c] <=> glc-D[c] + malthp[c]	0		AMALT4	malt[c] + malthx[c] <=> glc-D[c] + malthp[c]	0		AMALT4	malt[c] + malthx[c] <=> glc-D[c] + malthp[c]	0
DDGLK	atp[c] + 2ddglcn[c] <=> adp[c] + 2ddg6p[c]	0		DDGLK	atp[c] + 2ddglcn[c] <=> adp[c] + 2ddg6p[c]	0		DDGLK	atp[c] + 2ddglcn[c] <=> adp[c] + 2ddg6p[c]	0		DDGLK	atp[c] + 2ddglcn[c] <=> adp[c] + 2ddg6p[c]	0		DDGLK	atp[c] + 2ddglcn[c] <=> adp[c] + 2ddg6p[c]	0		DDGLK	atp[c] + 2ddglcn[c] <=> adp[c] + 2ddg6p[c]	0
GLYCDx	nad[c] + glyc[c] <=> h[c] + nadh[c] + dha[c]	0		GLYCDx	nad[c] + glyc[c] <=> h[c] + nadh[c] + dha[c]	0		GLYCDx	nad[c] + glyc[c] <=> h[c] + nadh[c] + dha[c]	0		GLYCDx	nad[c] + glyc[c] <=> h[c] + nadh[c] + dha[c]	0		GLYCDx	nad[c] + glyc[c] <=> h[c] + nadh[c] + dha[c]	0		GLYCDx	nad[c] + glyc[c] <=> h[c] + nadh[c] + dha[c]	0
MANAO	nad[c] + mana[c] <=> h[c] + nadh[c] + fruur[c]	0		MANAO	nad[c] + mana[c] <=> h[c] + nadh[c] + fruur[c]	0		MANAO	nad[c] + mana[c] <=> h[c] + nadh[c] + fruur[c]	0		MANAO	nad[c] + mana[c] <=> h[c] + nadh[c] + fruur[c]	0		MANAO	nad[c] + mana[c] <=> h[c] + nadh[c] + fruur[c]	0		MANAO	nad[c] + mana[c] <=> h[c] + nadh[c] + fruur[c]	0
MNNH	mana[c] -> h2o[c] + 2ddglcn[c]	0		MNNH	mana[c] -> h2o[c] + 2ddglcn[c]	0		MNNH	mana[c] -> h2o[c] + 2ddglcn[c]	0		MNNH	mana[c] -> h2o[c] + 2ddglcn[c]	0		MNNH	mana[c] -> h2o[c] + 2ddglcn[c]	0		MNNH	mana[c] -> h2o[c] + 2ddglcn[c]	0
PPM2	2dr1p[c] <=> 2dr5p[c]	0		PPM2	2dr1p[c] <=> 2dr5p[c]	0		PPM2	2dr1p[c] <=> 2dr5p[c]	0		PPM2	2dr1p[c] <=> 2dr5p[c]	0		PPM2	2dr1p[c] <=> 2dr5p[c]	0		PPM2	2dr1p[c] <=> 2dr5p[c]	0
TARTD	tartr-L[c] -> h2o[c] + oaa[c]	0		TARTD	tartr-L[c] -> h2o[c] + oaa[c]	0		TARTD	tartr-L[c] -> h2o[c] + oaa[c]	0		TARTD	tartr-L[c] -> h2o[c] + oaa[c]	0		TARTD	tartr-L[c] -> h2o[c] + oaa[c]	0		TARTD	tartr-L[c] -> h2o[c] + oaa[c]	0
TRE6PP	h2o[c] + tre6p[c] -> pi[c] + h[c] + tre[c]	0		TRE6PP	h2o[c] + tre6p[c] -> pi[c] + h[c] + tre[c]	0		TRE6PP	h2o[c] + tre6p[c] -> pi[c] + h[c] + tre[c]	0		TRE6PP	h2o[c] + tre6p[c] -> pi[c] + h[c] + tre[c]	0		TRE6PP	h2o[c] + tre6p[c] -> pi[c] + h[c] + tre[c]	0		TRE6PP	h2o[c] + tre6p[c] -> pi[c] + h[c] + tre[c]	0
TREPS	udpg[c] + g6p[c] <=> tre6p[c] + udp[c]	0		TREPS	udpg[c] + g6p[c] <=> tre6p[c] + udp[c]	0		TREPS	udpg[c] + g6p[c] <=> tre6p[c] + udp[c]	0		TREPS	udpg[c] + g6p[c] <=> tre6p[c] + udp[c]	0		TREPS	udpg[c] + g6p[c] <=> tre6p[c] + udp[c]	0		TREPS	udpg[c] + g6p[c] <=> tre6p[c] + udp[c]	0
XYLI1	xyl-D[c] <=> xylu-D[c]	0		XYLI1	xyl-D[c] <=> xylu-D[c]	0		XYLI1	xyl-D[c] <=> xylu-D[c]	3		XYLI1	xyl-D[c] <=> xylu-D[c]	0		XYLI1	xyl-D[c] <=> xylu-D[c]	0		XYLI1	xyl-D[c] <=> xylu-D[c]	0
XYLI2	glc-D[c] <=> fru[c]	0		XYLI2	glc-D[c] <=> fru[c]	0		XYLI2	glc-D[c] <=> fru[c]	0		XYLI2	glc-D[c] <=> fru[c]	0		XYLI2	glc-D[c] <=> fru[c]	0		XYLI2	glc-D[c] <=> fru[c]	0
XYLK	atp[c] + xylu-D[c] <=> adp[c] + xu5p-D[c]	0		XYLK	atp[c] + xylu-D[c] <=> adp[c] + xu5p-D[c]	0		XYLK	atp[c] + xylu-D[c] <=> adp[c] + xu5p-D[c]	3		XYLK	atp[c] + xylu-D[c] <=> adp[c] + xu5p-D[c]	0		XYLK	atp[c] + xylu-D[c] <=> adp[c] + xu5p-D[c]	0		XYLK	atp[c] + xylu-D[c] <=> adp[c] + xu5p-D[c]	0
4HTHRS	h2o[c] + phthr[c] -> pi[c] + h[c] + 4hthr[c]	0		4HTHRS	h2o[c] + phthr[c] -> pi[c] + h[c] + 4hthr[c]	0		4HTHRS	h2o[c] + phthr[c] -> pi[c] + h[c] + 4hthr[c]	0		4HTHRS	h2o[c] + phthr[c] -> pi[c] + h[c] + 4hthr[c]	0		4HTHRS	h2o[c] + phthr[c] -> pi[c] + h[c] + 4hthr[c]	0		4HTHRS	h2o[c] + phthr[c] -> pi[c] + h[c] + 4hthr[c]	0
ACGK	atp[c] + h[c] + acglu[c] <=> adp[c] + acg5p[c]	0.032925		ACGK	atp[c] + h[c] + acglu[c] <=> adp[c] + acg5p[c]	0.0385321		ACGK	atp[c] + h[c] + acglu[c] <=> adp[c] + acg5p[c]	0.0228784		ACGK	atp[c] + h[c] + acglu[c] <=> adp[c] + acg5p[c]	0.00765437		ACGK	atp[c] + h[c] + acglu[c] <=> adp[c] + acg5p[c]	0.0197536		ACGK	atp[c] + h[c] + acglu[c] <=> adp[c] + acg5p[c]	0.00477192
ACGS	glu-L[c] + accoa[c] -> coa[c] + h[c] + acglu[c]	0		ACGS	glu-L[c] + accoa[c] -> coa[c] + h[c] + acglu[c]	0		ACGS	glu-L[c] + accoa[c] -> coa[c] + h[c] + acglu[c]	0		ACGS	glu-L[c] + accoa[c] -> coa[c] + h[c] + acglu[c]	0		ACGS	glu-L[c] + accoa[c] -> coa[c] + h[c] + acglu[c]	0		ACGS	glu-L[c] + accoa[c] -> coa[c] + h[c] + acglu[c]	0
ACHBS	h[c] + 2obut[c] + pyr[c] -> 2ahbut[c] + co2[c]	0.0370492		ACHBS	h[c] + 2obut[c] + pyr[c] -> 2ahbut[c] + co2[c]	0.0433586		ACHBS	h[c] + 2obut[c] + pyr[c] -> 2ahbut[c] + co2[c]	0.0257442		ACHBS	h[c] + 2obut[c] + pyr[c] -> 2ahbut[c] + co2[c]	0.00861316		ACHBS	h[c] + 2obut[c] + pyr[c] -> 2ahbut[c] + co2[c]	0.022228		ACHBS	h[c] + 2obut[c] + pyr[c] -> 2ahbut[c] + co2[c]	0.00536965
ACLS	h[c] + 2 pyr[c] -> co2[c] + alac-S[c]	0.100657		ACLS	h[c] + 2 pyr[c] -> co2[c] + alac-S[c]	0.117799		ACLS	h[c] + 2 pyr[c] -> co2[c] + alac-S[c]	0.0699432		ACLS	h[c] + 2 pyr[c] -> co2[c] + alac-S[c]	0.0234007		ACLS	h[c] + 2 pyr[c] -> co2[c] + alac-S[c]	0.0603901		ACLS	h[c] + 2 pyr[c] -> co2[c] + alac-S[c]	0.0145885
ACODA	h2o[c] + acorn[c] <=> ac[c] + orn[c]	0		ACODA	h2o[c] + acorn[c] <=> ac[c] + orn[c]	0		ACODA	h2o[c] + acorn[c] <=> ac[c] + orn[c]	0		ACODA	h2o[c] + acorn[c] <=> ac[c] + orn[c]	0		ACODA	h2o[c] + acorn[c] <=> ac[c] + orn[c]	0		ACODA	h2o[c] + acorn[c] <=> ac[c] + orn[c]	0
ACOTA	acorn[c] + akg[c] <=> glu-L[c] + acg5sa[c]	-0.032925		ACOTA	acorn[c] + akg[c] <=> glu-L[c] + acg5sa[c]	-0.0385321		ACOTA	acorn[c] + akg[c] <=> glu-L[c] + acg5sa[c]	-0.0228784		ACOTA	acorn[c] + akg[c] <=> glu-L[c] + acg5sa[c]	-0.00765437		ACOTA	acorn[c] + akg[c] <=> glu-L[c] + acg5sa[c]	-0.0197536		ACOTA	acorn[c] + akg[c] <=> glu-L[c] + acg5sa[c]	-0.00477192
ADMDC	h[c] + amet[c] -> co2[c] + ametam[c]	0		ADMDC	h[c] + amet[c] -> co2[c] + ametam[c]	0		ADMDC	h[c] + amet[c] -> co2[c] + ametam[c]	0		ADMDC	h[c] + amet[c] -> co2[c] + ametam[c]	0		ADMDC	h[c] + amet[c] -> co2[c] + ametam[c]	0		ADMDC	h[c] + amet[c] -> co2[c] + ametam[c]	0
AGMT	h2o[c] + agm[c] <=> ptrc[c] + urea[c]	0		AGMT	h2o[c] + agm[c] <=> ptrc[c] + urea[c]	0		AGMT	h2o[c] + agm[c] <=> ptrc[c] + urea[c]	0		AGMT	h2o[c] + agm[c] <=> ptrc[c] + urea[c]	0		AGMT	h2o[c] + agm[c] <=> ptrc[c] + urea[c]	0		AGMT	h2o[c] + agm[c] <=> ptrc[c] + urea[c]	0
AGPR	nadph[c] + acg5p[c] -> nadp[c] + pi[c] + acg5sa[c]	0.032925		AGPR	nadph[c] + acg5p[c] -> nadp[c] + pi[c] + acg5sa[c]	0.0385321		AGPR	nadph[c] + acg5p[c] -> nadp[c] + pi[c] + acg5sa[c]	0.0228784		AGPR	nadph[c] + acg5p[c] -> nadp[c] + pi[c] + acg5sa[c]	0.00765437		AGPR	nadph[c] + acg5p[c] -> nadp[c] + pi[c] + acg5sa[c]	0.0197536		AGPR	nadph[c] + acg5p[c] -> nadp[c] + pi[c] + acg5sa[c]	0.00477192
AHSERL4	acser[c] + trdrd[c] + tsul[c] <=> cys-L[c] + ac[c] + trdox[c] + so3[c]	0		AHSERL4	acser[c] + trdrd[c] + tsul[c] <=> cys-L[c] + ac[c] + trdox[c] + so3[c]	0		AHSERL4	acser[c] + trdrd[c] + tsul[c] <=> cys-L[c] + ac[c] + trdox[c] + so3[c]	0		AHSERL4	acser[c] + trdrd[c] + tsul[c] <=> cys-L[c] + ac[c] + trdox[c] + so3[c]	0		AHSERL4	acser[c] + trdrd[c] + tsul[c] <=> cys-L[c] + ac[c] + trdox[c] + so3[c]	0		AHSERL4	acser[c] + trdrd[c] + tsul[c] <=> cys-L[c] + ac[c] + trdox[c] + so3[c]	0
ALAALA	atp[c] + 2 ala-D[c] -> pi[c] + h[c] + adp[c] + alaala[c]	0.011802		ALAALA	atp[c] + 2 ala-D[c] -> pi[c] + h[c] + adp[c] + alaala[c]	0.0138118		ALAALA	atp[c] + 2 ala-D[c] -> pi[c] + h[c] + adp[c] + alaala[c]	0.0082008		ALAALA	atp[c] + 2 ala-D[c] -> pi[c] + h[c] + adp[c] + alaala[c]	0.00274371		ALAALA	atp[c] + 2 ala-D[c] -> pi[c] + h[c] + adp[c] + alaala[c]	0.0070807		ALAALA	atp[c] + 2 ala-D[c] -> pi[c] + h[c] + adp[c] + alaala[c]	0.0017105
ALAR	ala-L[c] <=> ala-D[c]	0.0406114		ALAR	ala-L[c] <=> ala-D[c]	0.0475274		ALAR	ala-L[c] <=> ala-D[c]	0.0282194		ALAR	ala-L[c] <=> ala-D[c]	0.00944128		ALAR	ala-L[c] <=> ala-D[c]	0.0243651		ALAR	ala-L[c] <=> ala-D[c]	0.00588593
AMID	h2o[c] + 4gudbd[c] -> nh4[c] + 4gudbutn[c]	0		AMID	h2o[c] + 4gudbd[c] -> nh4[c] + 4gudbutn[c]	0		AMID	h2o[c] + 4gudbd[c] -> nh4[c] + 4gudbutn[c]	0		AMID	h2o[c] + 4gudbd[c] -> nh4[c] + 4gudbutn[c]	0		AMID	h2o[c] + 4gudbd[c] -> nh4[c] + 4gudbutn[c]	0		AMID	h2o[c] + 4gudbd[c] -> nh4[c] + 4gudbutn[c]	0
AMPTASECG	h2o[c] + cgly[c] <=> cys-L[c] + gly[c]	0		AMPTASECG	h2o[c] + cgly[c] <=> cys-L[c] + gly[c]	0		AMPTASECG	h2o[c] + cgly[c] <=> cys-L[c] + gly[c]	0		AMPTASECG	h2o[c] + cgly[c] <=> cys-L[c] + gly[c]	0		AMPTASECG	h2o[c] + cgly[c] <=> cys-L[c] + gly[c]	0		AMPTASECG	h2o[c] + cgly[c] <=> cys-L[c] + gly[c]	0
ANPRT	prpp[c] + anth[c] -> ppi[c] + pran[c]	0.00542567		ANPRT	prpp[c] + anth[c] -> ppi[c] + pran[c]	0.00634965		ANPRT	prpp[c] + anth[c] -> ppi[c] + pran[c]	0.00377011		ANPRT	prpp[c] + anth[c] -> ppi[c] + pran[c]	0.00126135		ANPRT	prpp[c] + anth[c] -> ppi[c] + pran[c]	0.00325517		ANPRT	prpp[c] + anth[c] -> ppi[c] + pran[c]	0.000786358
ANS	gln-L[c] + chor[c] -> glu-L[c] + h[c] + pyr[c] + anth[c]	0		ANS	gln-L[c] + chor[c] -> glu-L[c] + h[c] + pyr[c] + anth[c]	0		ANS	gln-L[c] + chor[c] -> glu-L[c] + h[c] + pyr[c] + anth[c]	0		ANS	gln-L[c] + chor[c] -> glu-L[c] + h[c] + pyr[c] + anth[c]	0.00126135		ANS	gln-L[c] + chor[c] -> glu-L[c] + h[c] + pyr[c] + anth[c]	0		ANS	gln-L[c] + chor[c] -> glu-L[c] + h[c] + pyr[c] + anth[c]	0
ANS2	nh4[c] + chor[c] -> h2o[c] + h[c] + pyr[c] + anth[c]	0.00542567		ANS2	nh4[c] + chor[c] -> h2o[c] + h[c] + pyr[c] + anth[c]	0.00634965		ANS2	nh4[c] + chor[c] -> h2o[c] + h[c] + pyr[c] + anth[c]	0.00377011		ANS2	nh4[c] + chor[c] -> h2o[c] + h[c] + pyr[c] + anth[c]	0		ANS2	nh4[c] + chor[c] -> h2o[c] + h[c] + pyr[c] + anth[c]	0.00325517		ANS2	nh4[c] + chor[c] -> h2o[c] + h[c] + pyr[c] + anth[c]	0.000786358
ARGDC	arg-L[c] + h[c] -> co2[c] + agm[c]	0		ARGDC	arg-L[c] + h[c] -> co2[c] + agm[c]	0		ARGDC	arg-L[c] + h[c] -> co2[c] + agm[c]	0		ARGDC	arg-L[c] + h[c] -> co2[c] + agm[c]	0		ARGDC	arg-L[c] + h[c] -> co2[c] + agm[c]	0		ARGDC	arg-L[c] + h[c] -> co2[c] + agm[c]	0
ARGN	h2o[c] + arg-L[c] <=> orn[c] + urea[c]	0		ARGN	h2o[c] + arg-L[c] <=> orn[c] + urea[c]	0		ARGN	h2o[c] + arg-L[c] <=> orn[c] + urea[c]	0		ARGN	h2o[c] + arg-L[c] <=> orn[c] + urea[c]	0		ARGN	h2o[c] + arg-L[c] <=> orn[c] + urea[c]	0		ARGN	h2o[c] + arg-L[c] <=> orn[c] + urea[c]	0
ARGSL	argsuc[c] <=> arg-L[c] + fum[c]	0.032925		ARGSL	argsuc[c] <=> arg-L[c] + fum[c]	0.0385321		ARGSL	argsuc[c] <=> arg-L[c] + fum[c]	0.0228784		ARGSL	argsuc[c] <=> arg-L[c] + fum[c]	0.00765437		ARGSL	argsuc[c] <=> arg-L[c] + fum[c]	0.0197536		ARGSL	argsuc[c] <=> arg-L[c] + fum[c]	0.00477192
ARGSS	atp[c] + asp-L[c] + citr-L[c] <=> amp[c] + ppi[c] + argsuc[c]	0.032925		ARGSS	atp[c] + asp-L[c] + citr-L[c] <=> amp[c] + ppi[c] + argsuc[c]	0.0385321		ARGSS	atp[c] + asp-L[c] + citr-L[c] <=> amp[c] + ppi[c] + argsuc[c]	0.0228784		ARGSS	atp[c] + asp-L[c] + citr-L[c] <=> amp[c] + ppi[c] + argsuc[c]	0.00765437		ARGSS	atp[c] + asp-L[c] + citr-L[c] <=> amp[c] + ppi[c] + argsuc[c]	0.0197536		ARGSS	atp[c] + asp-L[c] + citr-L[c] <=> amp[c] + ppi[c] + argsuc[c]	0.00477192
ASAD	nadph[c] + 4pasp[c] -> nadp[c] + pi[c] + aspsa[c]	0.104615		ASAD	nadph[c] + 4pasp[c] -> nadp[c] + pi[c] + aspsa[c]	0.122431		ASAD	nadph[c] + 4pasp[c] -> nadp[c] + pi[c] + aspsa[c]	0.0726934		ASAD	nadph[c] + 4pasp[c] -> nadp[c] + pi[c] + aspsa[c]	0.0243208		ASAD	nadph[c] + 4pasp[c] -> nadp[c] + pi[c] + aspsa[c]	0.0627646		ASAD	nadph[c] + 4pasp[c] -> nadp[c] + pi[c] + aspsa[c]	0.0151622
ASNS1	h2o[c] + atp[c] + gln-L[c] + asp-L[c] -> glu-L[c] + amp[c] + asn-L[c] + ppi[c]	0.0146076		ASNS1	h2o[c] + atp[c] + gln-L[c] + asp-L[c] -> glu-L[c] + amp[c] + asn-L[c] + ppi[c]	0.0170952		ASNS1	h2o[c] + atp[c] + gln-L[c] + asp-L[c] -> glu-L[c] + amp[c] + asn-L[c] + ppi[c]	0.0101503		ASNS1	h2o[c] + atp[c] + gln-L[c] + asp-L[c] -> glu-L[c] + amp[c] + asn-L[c] + ppi[c]	0.00339595		ASNS1	h2o[c] + atp[c] + gln-L[c] + asp-L[c] -> glu-L[c] + amp[c] + asn-L[c] + ppi[c]	0.00876393		ASNS1	h2o[c] + atp[c] + gln-L[c] + asp-L[c] -> glu-L[c] + amp[c] + asn-L[c] + ppi[c]	0.00211712
ASPK	atp[c] + asp-L[c] + h[c] <=> adp[c] + 4pasp[c]	0.104615		ASPK	atp[c] + asp-L[c] + h[c] <=> adp[c] + 4pasp[c]	0.122431		ASPK	atp[c] + asp-L[c] + h[c] <=> adp[c] + 4pasp[c]	0.0726934		ASPK	atp[c] + asp-L[c] + h[c] <=> adp[c] + 4pasp[c]	0.0243208		ASPK	atp[c] + asp-L[c] + h[c] <=> adp[c] + 4pasp[c]	0.0627646		ASPK	atp[c] + asp-L[c] + h[c] <=> adp[c] + 4pasp[c]	0.0151622
ASPT	asp-L[c] <=> nh4[c] + fum[c]	-1000		ASPT	asp-L[c] <=> nh4[c] + fum[c]	-1000		ASPT	asp-L[c] <=> nh4[c] + fum[c]	-0.760623		ASPT	asp-L[c] <=> nh4[c] + fum[c]	-0.255741		ASPT	asp-L[c] <=> nh4[c] + fum[c]	-0.656734		ASPT	asp-L[c] <=> nh4[c] + fum[c]	-0.15948
ASPTA	asp-L[c] + akg[c] <=> glu-L[c] + oaa[c]	999.701		ASPTA	asp-L[c] + akg[c] <=> glu-L[c] + oaa[c]	999.651		ASPTA	asp-L[c] + akg[c] <=> glu-L[c] + oaa[c]	0.553151		ASPTA	asp-L[c] + akg[c] <=> glu-L[c] + oaa[c]	0.186327		ASPTA	asp-L[c] + akg[c] <=> glu-L[c] + oaa[c]	0.477599		ASPTA	asp-L[c] + akg[c] <=> glu-L[c] + oaa[c]	0.116206
ATPPRT	atp[c] + prpp[c] -> ppi[c] + prbatp[c]	0.00838197		ATPPRT	atp[c] + prpp[c] -> ppi[c] + prbatp[c]	0.00980939		ATPPRT	atp[c] + prpp[c] -> ppi[c] + prbatp[c]	0.00582434		ATPPRT	atp[c] + prpp[c] -> ppi[c] + prbatp[c]	0.00194863		ATPPRT	atp[c] + prpp[c] -> ppi[c] + prbatp[c]	0.00502882		ATPPRT	atp[c] + prpp[c] -> ppi[c] + prbatp[c]	0.00121482
CBPS	h2o[c] + 2 atp[c] + gln-L[c] + hco3[c] -> glu-L[c] + pi[c] + h[c] + 2 adp[c] + cbp[c]	0.0976969		CBPS	h2o[c] + 2 atp[c] + gln-L[c] + hco3[c] -> glu-L[c] + pi[c] + h[c] + 2 adp[c] + cbp[c]	0.114334		CBPS	h2o[c] + 2 atp[c] + gln-L[c] + hco3[c] -> glu-L[c] + pi[c] + h[c] + 2 adp[c] + cbp[c]	0.0678862		CBPS	h2o[c] + 2 atp[c] + gln-L[c] + hco3[c] -> glu-L[c] + pi[c] + h[c] + 2 adp[c] + cbp[c]	0.0227124		CBPS	h2o[c] + 2 atp[c] + gln-L[c] + hco3[c] -> glu-L[c] + pi[c] + h[c] + 2 adp[c] + cbp[c]	0.058614		CBPS	h2o[c] + 2 atp[c] + gln-L[c] + hco3[c] -> glu-L[c] + pi[c] + h[c] + 2 adp[c] + cbp[c]	0.0141595
CHORM	chor[c] -> pphn[c]	0.0310005		CHORM	chor[c] -> pphn[c]	0.0362798		CHORM	chor[c] -> pphn[c]	0.0215412		CHORM	chor[c] -> pphn[c]	0.00720696		CHORM	chor[c] -> pphn[c]	0.018599		CHORM	chor[c] -> pphn[c]	0.004493
CHORS	3psme[c] -> pi[c] + h[c] + chor[c]	0.0368667		CHORS	3psme[c] -> pi[c] + h[c] + chor[c]	0.0431451		CHORS	3psme[c] -> pi[c] + h[c] + chor[c]	0.0256174		CHORS	3psme[c] -> pi[c] + h[c] + chor[c]	0.00857073		CHORS	3psme[c] -> pi[c] + h[c] + chor[c]	0.0221185		CHORS	3psme[c] -> pi[c] + h[c] + chor[c]	0.0053432
CYSDS	h2o[c] + cys-L[c] -> pyr[c] + nh4[c] + h2s[c]	0		CYSDS	h2o[c] + cys-L[c] -> pyr[c] + nh4[c] + h2s[c]	0		CYSDS	h2o[c] + cys-L[c] -> pyr[c] + nh4[c] + h2s[c]	0		CYSDS	h2o[c] + cys-L[c] -> pyr[c] + nh4[c] + h2s[c]	0		CYSDS	h2o[c] + cys-L[c] -> pyr[c] + nh4[c] + h2s[c]	0		CYSDS	h2o[c] + cys-L[c] -> pyr[c] + nh4[c] + h2s[c]	0
CYSS	acser[c] + h2s[c] -> cys-L[c] + h[c] + ac[c]	0.00571834		CYSS	acser[c] + h2s[c] -> cys-L[c] + h[c] + ac[c]	0.00669216		CYSS	acser[c] + h2s[c] -> cys-L[c] + h[c] + ac[c]	0.00397348		CYSS	acser[c] + h2s[c] -> cys-L[c] + h[c] + ac[c]	0.00132939		CYSS	acser[c] + h2s[c] -> cys-L[c] + h[c] + ac[c]	0.00343076		CYSS	acser[c] + h2s[c] -> cys-L[c] + h[c] + ac[c]	0.000828776
CYSTL	h2o[c] + cysth-L[c] -> pyr[c] + nh4[c] + hcys-L[c]	0		CYSTL	h2o[c] + cysth-L[c] -> pyr[c] + nh4[c] + hcys-L[c]	0		CYSTL	h2o[c] + cysth-L[c] -> pyr[c] + nh4[c] + hcys-L[c]	0		CYSTL	h2o[c] + cysth-L[c] -> pyr[c] + nh4[c] + hcys-L[c]	0		CYSTL	h2o[c] + cysth-L[c] -> pyr[c] + nh4[c] + hcys-L[c]	0		CYSTL	h2o[c] + cysth-L[c] -> pyr[c] + nh4[c] + hcys-L[c]	0
DAPAT	akg[c] + 26dap-LL[c] -> h2o[c] + glu-L[c] + h[c] + thdp[c]	0		DAPAT	akg[c] + 26dap-LL[c] -> h2o[c] + glu-L[c] + h[c] + thdp[c]	0		DAPAT	akg[c] + 26dap-LL[c] -> h2o[c] + glu-L[c] + h[c] + thdp[c]	0		DAPAT	akg[c] + 26dap-LL[c] -> h2o[c] + glu-L[c] + h[c] + thdp[c]	0		DAPAT	akg[c] + 26dap-LL[c] -> h2o[c] + glu-L[c] + h[c] + thdp[c]	0		DAPAT	akg[c] + 26dap-LL[c] -> h2o[c] + glu-L[c] + h[c] + thdp[c]	0
DAPDC	h[c] + 26dap-M[c] -> lys-L[c] + co2[c]	0.0209491		DAPDC	h[c] + 26dap-M[c] -> lys-L[c] + co2[c]	0.0245167		DAPDC	h[c] + 26dap-M[c] -> lys-L[c] + co2[c]	0.0145568		DAPDC	h[c] + 26dap-M[c] -> lys-L[c] + co2[c]	0.00487023		DAPDC	h[c] + 26dap-M[c] -> lys-L[c] + co2[c]	0.0125686		DAPDC	h[c] + 26dap-M[c] -> lys-L[c] + co2[c]	0.00303622
DAPE	26dap-LL[c] <=> 26dap-M[c]	0.0327511		DAPE	26dap-LL[c] <=> 26dap-M[c]	0.0383285		DAPE	26dap-LL[c] <=> 26dap-M[c]	0.0227576		DAPE	26dap-LL[c] <=> 26dap-M[c]	0.00761394		DAPE	26dap-LL[c] <=> 26dap-M[c]	0.0196493		DAPE	26dap-LL[c] <=> 26dap-M[c]	0.00474671
DDPA	h2o[c] + pep[c] + e4p[c] -> pi[c] + h[c] + 2dda7p[c]	0.0368667		DDPA	h2o[c] + pep[c] + e4p[c] -> pi[c] + h[c] + 2dda7p[c]	0.0431451		DDPA	h2o[c] + pep[c] + e4p[c] -> pi[c] + h[c] + 2dda7p[c]	0.0256174		DDPA	h2o[c] + pep[c] + e4p[c] -> pi[c] + h[c] + 2dda7p[c]	0.00857073		DDPA	h2o[c] + pep[c] + e4p[c] -> pi[c] + h[c] + 2dda7p[c]	0.0221185		DDPA	h2o[c] + pep[c] + e4p[c] -> pi[c] + h[c] + 2dda7p[c]	0.0053432
DHAD1	23dhmb[c] -> h2o[c] + 3mob[c]	0.100657		DHAD1	23dhmb[c] -> h2o[c] + 3mob[c]	0.117799		DHAD1	23dhmb[c] -> h2o[c] + 3mob[c]	0.0699432		DHAD1	23dhmb[c] -> h2o[c] + 3mob[c]	0.0234007		DHAD1	23dhmb[c] -> h2o[c] + 3mob[c]	0.0603901		DHAD1	23dhmb[c] -> h2o[c] + 3mob[c]	0.0145885
DHAD2	23dhmp[c] -> h2o[c] + 3mop[c]	0.0370492		DHAD2	23dhmp[c] -> h2o[c] + 3mop[c]	0.0433586		DHAD2	23dhmp[c] -> h2o[c] + 3mop[c]	0.0257442		DHAD2	23dhmp[c] -> h2o[c] + 3mop[c]	0.00861316		DHAD2	23dhmp[c] -> h2o[c] + 3mop[c]	0.022228		DHAD2	23dhmp[c] -> h2o[c] + 3mop[c]	0.00536965
DHDPRy	nadp[c] + thdp[c] <=> nadph[c] + h[c] + 23dhdp[c]	-0.0327511		DHDPRy	nadp[c] + thdp[c] <=> nadph[c] + h[c] + 23dhdp[c]	-0.0383285		DHDPRy	nadp[c] + thdp[c] <=> nadph[c] + h[c] + 23dhdp[c]	-0.0227576		DHDPRy	nadp[c] + thdp[c] <=> nadph[c] + h[c] + 23dhdp[c]	-0.00761394		DHDPRy	nadp[c] + thdp[c] <=> nadph[c] + h[c] + 23dhdp[c]	-0.0196493		DHDPRy	nadp[c] + thdp[c] <=> nadph[c] + h[c] + 23dhdp[c]	-0.00474671
DHDPS	pyr[c] + aspsa[c] -> 2 h2o[c] + h[c] + 23dhdp[c]	0.0327511		DHDPS	pyr[c] + aspsa[c] -> 2 h2o[c] + h[c] + 23dhdp[c]	0.0383285		DHDPS	pyr[c] + aspsa[c] -> 2 h2o[c] + h[c] + 23dhdp[c]	0.0227576		DHDPS	pyr[c] + aspsa[c] -> 2 h2o[c] + h[c] + 23dhdp[c]	0.00761394		DHDPS	pyr[c] + aspsa[c] -> 2 h2o[c] + h[c] + 23dhdp[c]	0.0196493		DHDPS	pyr[c] + aspsa[c] -> 2 h2o[c] + h[c] + 23dhdp[c]	0.00474671
DHQD	3dhq[c] -> h2o[c] + 3dhsk[c]	0.0368667		DHQD	3dhq[c] -> h2o[c] + 3dhsk[c]	0.0431451		DHQD	3dhq[c] -> h2o[c] + 3dhsk[c]	0.0256174		DHQD	3dhq[c] -> h2o[c] + 3dhsk[c]	0.00857073		DHQD	3dhq[c] -> h2o[c] + 3dhsk[c]	0.0221185		DHQD	3dhq[c] -> h2o[c] + 3dhsk[c]	0.0053432
DHQS	2dda7p[c] -> pi[c] + h[c] + 3dhq[c]	0.0368667		DHQS	2dda7p[c] -> pi[c] + h[c] + 3dhq[c]	0.0431451		DHQS	2dda7p[c] -> pi[c] + h[c] + 3dhq[c]	0.0256174		DHQS	2dda7p[c] -> pi[c] + h[c] + 3dhq[c]	0.00857073		DHQS	2dda7p[c] -> pi[c] + h[c] + 3dhq[c]	0.0221185		DHQS	2dda7p[c] -> pi[c] + h[c] + 3dhq[c]	0.0053432
EHGLAT	akg[c] + e4hglu[c] <=> glu-L[c] + 4h2oglt[c]	0		EHGLAT	akg[c] + e4hglu[c] <=> glu-L[c] + 4h2oglt[c]	0		EHGLAT	akg[c] + e4hglu[c] <=> glu-L[c] + 4h2oglt[c]	0		EHGLAT	akg[c] + e4hglu[c] <=> glu-L[c] + 4h2oglt[c]	0		EHGLAT	akg[c] + e4hglu[c] <=> glu-L[c] + 4h2oglt[c]	0		EHGLAT	akg[c] + e4hglu[c] <=> glu-L[c] + 4h2oglt[c]	0
G5SADs	glu5sa[c] -> h2o[c] + h[c] + 1pyr5c[c]	0.0240098		G5SADs	glu5sa[c] -> h2o[c] + h[c] + 1pyr5c[c]	0.0280986		G5SADs	glu5sa[c] -> h2o[c] + h[c] + 1pyr5c[c]	0.0166835		G5SADs	glu5sa[c] -> h2o[c] + h[c] + 1pyr5c[c]	0.00558176		G5SADs	glu5sa[c] -> h2o[c] + h[c] + 1pyr5c[c]	0.0144048		G5SADs	glu5sa[c] -> h2o[c] + h[c] + 1pyr5c[c]	0.0034798
G5SD	nadph[c] + glu5p[c] -> nadp[c] + pi[c] + glu5sa[c]	0.0240098		G5SD	nadph[c] + glu5p[c] -> nadp[c] + pi[c] + glu5sa[c]	0.0280986		G5SD	nadph[c] + glu5p[c] -> nadp[c] + pi[c] + glu5sa[c]	0.0166835		G5SD	nadph[c] + glu5p[c] -> nadp[c] + pi[c] + glu5sa[c]	0.00558176		G5SD	nadph[c] + glu5p[c] -> nadp[c] + pi[c] + glu5sa[c]	0.0144048		G5SD	nadph[c] + glu5p[c] -> nadp[c] + pi[c] + glu5sa[c]	0.0034798
GCCa	gly[c] + h[c] + lpro[c] -> co2[c] + alpro[c]	0		GCCa	gly[c] + h[c] + lpro[c] -> co2[c] + alpro[c]	0		GCCa	gly[c] + h[c] + lpro[c] -> co2[c] + alpro[c]	0		GCCa	gly[c] + h[c] + lpro[c] -> co2[c] + alpro[c]	0		GCCa	gly[c] + h[c] + lpro[c] -> co2[c] + alpro[c]	0		GCCa	gly[c] + h[c] + lpro[c] -> co2[c] + alpro[c]	0
GCCb	alpro[c] + thf[c] -> mlthf[c] + nh4[c] + dhlpro[c]	0		GCCb	alpro[c] + thf[c] -> mlthf[c] + nh4[c] + dhlpro[c]	0		GCCb	alpro[c] + thf[c] -> mlthf[c] + nh4[c] + dhlpro[c]	0		GCCb	alpro[c] + thf[c] -> mlthf[c] + nh4[c] + dhlpro[c]	0		GCCb	alpro[c] + thf[c] -> mlthf[c] + nh4[c] + dhlpro[c]	0		GCCb	alpro[c] + thf[c] -> mlthf[c] + nh4[c] + dhlpro[c]	0
GCCc	nad[c] + dhlpro[c] <=> h[c] + nadh[c] + lpro[c]	0		GCCc	nad[c] + dhlpro[c] <=> h[c] + nadh[c] + lpro[c]	0		GCCc	nad[c] + dhlpro[c] <=> h[c] + nadh[c] + lpro[c]	0		GCCc	nad[c] + dhlpro[c] <=> h[c] + nadh[c] + lpro[c]	0		GCCc	nad[c] + dhlpro[c] <=> h[c] + nadh[c] + lpro[c]	0		GCCc	nad[c] + dhlpro[c] <=> h[c] + nadh[c] + lpro[c]	0
GHMT2r	h2o[c] + gly[c] + mlthf[c] <=> ser-L[c] + thf[c]	-0.0699569		GHMT2r	h2o[c] + gly[c] + mlthf[c] <=> ser-L[c] + thf[c]	-0.0818704		GHMT2r	h2o[c] + gly[c] + mlthf[c] <=> ser-L[c] + thf[c]	-0.0486106		GHMT2r	h2o[c] + gly[c] + mlthf[c] <=> ser-L[c] + thf[c]	-0.0162635		GHMT2r	h2o[c] + gly[c] + mlthf[c] <=> ser-L[c] + thf[c]	-0.0419712		GHMT2r	h2o[c] + gly[c] + mlthf[c] <=> ser-L[c] + thf[c]	-0.0101391
GLNS	atp[c] + glu-L[c] + nh4[c] -> gln-L[c] + pi[c] + h[c] + adp[c]	0		GLNS	atp[c] + glu-L[c] + nh4[c] -> gln-L[c] + pi[c] + h[c] + adp[c]	0		GLNS	atp[c] + glu-L[c] + nh4[c] -> gln-L[c] + pi[c] + h[c] + adp[c]	0		GLNS	atp[c] + glu-L[c] + nh4[c] -> gln-L[c] + pi[c] + h[c] + adp[c]	0		GLNS	atp[c] + glu-L[c] + nh4[c] -> gln-L[c] + pi[c] + h[c] + adp[c]	0		GLNS	atp[c] + glu-L[c] + nh4[c] -> gln-L[c] + pi[c] + h[c] + adp[c]	0
GLU5K	atp[c] + glu-L[c] + h[c] <=> adp[c] + glu5p[c]	0.0240098		GLU5K	atp[c] + glu-L[c] + h[c] <=> adp[c] + glu5p[c]	0.0280986		GLU5K	atp[c] + glu-L[c] + h[c] <=> adp[c] + glu5p[c]	0.0166835		GLU5K	atp[c] + glu-L[c] + h[c] <=> adp[c] + glu5p[c]	0.00558176		GLU5K	atp[c] + glu-L[c] + h[c] <=> adp[c] + glu5p[c]	0.0144048		GLU5K	atp[c] + glu-L[c] + h[c] <=> adp[c] + glu5p[c]	0.0034798
HCITS	h2o[c] + accoa[c] + akg[c] -> coa[c] + h[c] + hcit[c]	0		HCITS	h2o[c] + accoa[c] + akg[c] -> coa[c] + h[c] + hcit[c]	0		HCITS	h2o[c] + accoa[c] + akg[c] -> coa[c] + h[c] + hcit[c]	0		HCITS	h2o[c] + accoa[c] + akg[c] -> coa[c] + h[c] + hcit[c]	0		HCITS	h2o[c] + accoa[c] + akg[c] -> coa[c] + h[c] + hcit[c]	0		HCITS	h2o[c] + accoa[c] + akg[c] -> coa[c] + h[c] + hcit[c]	0
HCO3E	h[c] + hco3[c] <=> h2o[c] + co2[c]	-0.571708		HCO3E	h[c] + hco3[c] <=> h2o[c] + co2[c]	-0.669069		HCO3E	h[c] + hco3[c] <=> h2o[c] + co2[c]	-0.39726		HCO3E	h[c] + hco3[c] <=> h2o[c] + co2[c]	-0.279258		HCO3E	h[c] + hco3[c] <=> h2o[c] + co2[c]	-0.720681		HCO3E	h[c] + hco3[c] <=> h2o[c] + co2[c]	-0.0828593
HISTD	h2o[c] + 2 nad[c] + histd[c] -> his-L[c] + 3 h[c] + 2 nadh[c]	0.00838197		HISTD	h2o[c] + 2 nad[c] + histd[c] -> his-L[c] + 3 h[c] + 2 nadh[c]	0.00980939		HISTD	h2o[c] + 2 nad[c] + histd[c] -> his-L[c] + 3 h[c] + 2 nadh[c]	0.00582434		HISTD	h2o[c] + 2 nad[c] + histd[c] -> his-L[c] + 3 h[c] + 2 nadh[c]	0.00194863		HISTD	h2o[c] + 2 nad[c] + histd[c] -> his-L[c] + 3 h[c] + 2 nadh[c]	0.00502882		HISTD	h2o[c] + 2 nad[c] + histd[c] -> his-L[c] + 3 h[c] + 2 nadh[c]	0.00121482
HISTP	h2o[c] + hisp[c] -> pi[c] + h[c] + histd[c]	0.00838197		HISTP	h2o[c] + hisp[c] -> pi[c] + h[c] + histd[c]	0.00980939		HISTP	h2o[c] + hisp[c] -> pi[c] + h[c] + histd[c]	0.00582434		HISTP	h2o[c] + hisp[c] -> pi[c] + h[c] + histd[c]	0.00194863		HISTP	h2o[c] + hisp[c] -> pi[c] + h[c] + histd[c]	0.00502882		HISTP	h2o[c] + hisp[c] -> pi[c] + h[c] + histd[c]	0.00121482
HSDy	nadp[c] + hom-L[c] <=> nadph[c] + h[c] + aspsa[c]	-0.071864		HSDy	nadp[c] + hom-L[c] <=> nadph[c] + h[c] + aspsa[c]	-0.0841022		HSDy	nadp[c] + hom-L[c] <=> nadph[c] + h[c] + aspsa[c]	-0.0499358		HSDy	nadp[c] + hom-L[c] <=> nadph[c] + h[c] + aspsa[c]	-0.0167068		HSDy	nadp[c] + hom-L[c] <=> nadph[c] + h[c] + aspsa[c]	-0.0431153		HSDy	nadp[c] + hom-L[c] <=> nadph[c] + h[c] + aspsa[c]	-0.0104155
HSERTA	accoa[c] + hom-L[c] -> coa[c] + achms[c]	0.0477731		HSERTA	accoa[c] + hom-L[c] -> coa[c] + achms[c]	0.0559087		HSERTA	accoa[c] + hom-L[c] -> coa[c] + achms[c]	0.0331958		HSERTA	accoa[c] + hom-L[c] -> coa[c] + achms[c]	0.0111062		HSERTA	accoa[c] + hom-L[c] -> coa[c] + achms[c]	0.0286618		HSERTA	accoa[c] + hom-L[c] -> coa[c] + achms[c]	0.00692389
HSK	atp[c] + hom-L[c] <=> adp[c] + phom[c]	0.0240909		HSK	atp[c] + hom-L[c] <=> adp[c] + phom[c]	0.0281935		HSK	atp[c] + hom-L[c] <=> adp[c] + phom[c]	0.0167399		HSK	atp[c] + hom-L[c] <=> adp[c] + phom[c]	0.00560062		HSK	atp[c] + hom-L[c] <=> adp[c] + phom[c]	0.0144535		HSK	atp[c] + hom-L[c] <=> adp[c] + phom[c]	0.00349157
HSTPT	akg[c] + hisp[c] <=> glu-L[c] + imacp[c]	-0.00838197		HSTPT	akg[c] + hisp[c] <=> glu-L[c] + imacp[c]	-0.00980939		HSTPT	akg[c] + hisp[c] <=> glu-L[c] + imacp[c]	-0.00582434		HSTPT	akg[c] + hisp[c] <=> glu-L[c] + imacp[c]	-0.00194863		HSTPT	akg[c] + hisp[c] <=> glu-L[c] + imacp[c]	-0.00502882		HSTPT	akg[c] + hisp[c] <=> glu-L[c] + imacp[c]	-0.00121482
IG3PS	gln-L[c] + prlp[c] -> glu-L[c] + h[c] + aicar[c] + eig3p[c]	0.00838197		IG3PS	gln-L[c] + prlp[c] -> glu-L[c] + h[c] + aicar[c] + eig3p[c]	0.00980939		IG3PS	gln-L[c] + prlp[c] -> glu-L[c] + h[c] + aicar[c] + eig3p[c]	0.00582434		IG3PS	gln-L[c] + prlp[c] -> glu-L[c] + h[c] + aicar[c] + eig3p[c]	0.00194863		IG3PS	gln-L[c] + prlp[c] -> glu-L[c] + h[c] + aicar[c] + eig3p[c]	0.00502882		IG3PS	gln-L[c] + prlp[c] -> glu-L[c] + h[c] + aicar[c] + eig3p[c]	0.00121482
IGPDH	eig3p[c] -> h2o[c] + imacp[c]	0.00838197		IGPDH	eig3p[c] -> h2o[c] + imacp[c]	0.00980939		IGPDH	eig3p[c] -> h2o[c] + imacp[c]	0.00582434		IGPDH	eig3p[c] -> h2o[c] + imacp[c]	0.00194863		IGPDH	eig3p[c] -> h2o[c] + imacp[c]	0.00502882		IGPDH	eig3p[c] -> h2o[c] + imacp[c]	0.00121482
IGPS	h[c] + 2cpr5p[c] -> h2o[c] + co2[c] + 3ig3p[c]	0.00542567		IGPS	h[c] + 2cpr5p[c] -> h2o[c] + co2[c] + 3ig3p[c]	0.00634965		IGPS	h[c] + 2cpr5p[c] -> h2o[c] + co2[c] + 3ig3p[c]	0.00377011		IGPS	h[c] + 2cpr5p[c] -> h2o[c] + co2[c] + 3ig3p[c]	0.00126135		IGPS	h[c] + 2cpr5p[c] -> h2o[c] + co2[c] + 3ig3p[c]	0.00325517		IGPS	h[c] + 2cpr5p[c] -> h2o[c] + co2[c] + 3ig3p[c]	0.000786358
ILETA	ile-L[c] + akg[c] <=> glu-L[c] + 3mop[c]	-0.0289833		ILETA	ile-L[c] + akg[c] <=> glu-L[c] + 3mop[c]	-0.0339191		ILETA	ile-L[c] + akg[c] <=> glu-L[c] + 3mop[c]	-0.0201395		ILETA	ile-L[c] + akg[c] <=> glu-L[c] + 3mop[c]	-0.006738		ILETA	ile-L[c] + akg[c] <=> glu-L[c] + 3mop[c]	-0.0173887		ILETA	ile-L[c] + akg[c] <=> glu-L[c] + 3mop[c]	-0.00420063
IPMD	nad[c] + 3c2hmp[c] <=> h[c] + nadh[c] + 3c4mop[c]	0.0633587		IPMD	nad[c] + 3c2hmp[c] <=> h[c] + nadh[c] + 3c4mop[c]	0.0741485		IPMD	nad[c] + 3c2hmp[c] <=> h[c] + nadh[c] + 3c4mop[c]	0.0440257		IPMD	nad[c] + 3c2hmp[c] <=> h[c] + nadh[c] + 3c4mop[c]	0.0147295		IPMD	nad[c] + 3c2hmp[c] <=> h[c] + nadh[c] + 3c4mop[c]	0.0380125		IPMD	nad[c] + 3c2hmp[c] <=> h[c] + nadh[c] + 3c4mop[c]	0.00918276
IPPMIa	3c2hmp[c] <=> h2o[c] + 2ippm[c]	-0.0633587		IPPMIa	3c2hmp[c] <=> h2o[c] + 2ippm[c]	-0.0741485		IPPMIa	3c2hmp[c] <=> h2o[c] + 2ippm[c]	-0.0440257		IPPMIa	3c2hmp[c] <=> h2o[c] + 2ippm[c]	-0.0147295		IPPMIa	3c2hmp[c] <=> h2o[c] + 2ippm[c]	-0.0380125		IPPMIa	3c2hmp[c] <=> h2o[c] + 2ippm[c]	-0.00918276
IPPMIb	3c3hmp[c] <=> h2o[c] + 2ippm[c]	0.0633587		IPPMIb	3c3hmp[c] <=> h2o[c] + 2ippm[c]	0.0741485		IPPMIb	3c3hmp[c] <=> h2o[c] + 2ippm[c]	0.0440257		IPPMIb	3c3hmp[c] <=> h2o[c] + 2ippm[c]	0.0147295		IPPMIb	3c3hmp[c] <=> h2o[c] + 2ippm[c]	0.0380125		IPPMIb	3c3hmp[c] <=> h2o[c] + 2ippm[c]	0.00918276
IPPS	h2o[c] + accoa[c] + 3mob[c] -> coa[c] + h[c] + 3c3hmp[c]	0.0633587		IPPS	h2o[c] + accoa[c] + 3mob[c] -> coa[c] + h[c] + 3c3hmp[c]	0.0741485		IPPS	h2o[c] + accoa[c] + 3mob[c] -> coa[c] + h[c] + 3c3hmp[c]	0.0440257		IPPS	h2o[c] + accoa[c] + 3mob[c] -> coa[c] + h[c] + 3c3hmp[c]	0.0147295		IPPS	h2o[c] + accoa[c] + 3mob[c] -> coa[c] + h[c] + 3c3hmp[c]	0.0380125		IPPS	h2o[c] + accoa[c] + 3mob[c] -> coa[c] + h[c] + 3c3hmp[c]	0.00918276
KARA1	nadph[c] + h[c] + alac-S[c] <=> nadp[c] + 23dhmb[c]	0.100657		KARA1	nadph[c] + h[c] + alac-S[c] <=> nadp[c] + 23dhmb[c]	0.117799		KARA1	nadph[c] + h[c] + alac-S[c] <=> nadp[c] + 23dhmb[c]	0.0699432		KARA1	nadph[c] + h[c] + alac-S[c] <=> nadp[c] + 23dhmb[c]	0.0234007		KARA1	nadph[c] + h[c] + alac-S[c] <=> nadp[c] + 23dhmb[c]	0.0603901		KARA1	nadph[c] + h[c] + alac-S[c] <=> nadp[c] + 23dhmb[c]	0.0145885
KARA2	nadph[c] + h[c] + 2ahbut[c] <=> nadp[c] + 23dhmp[c]	0.0370492		KARA2	nadph[c] + h[c] + 2ahbut[c] <=> nadp[c] + 23dhmp[c]	0.0433586		KARA2	nadph[c] + h[c] + 2ahbut[c] <=> nadp[c] + 23dhmp[c]	0.0257442		KARA2	nadph[c] + h[c] + 2ahbut[c] <=> nadp[c] + 23dhmp[c]	0.00861316		KARA2	nadph[c] + h[c] + 2ahbut[c] <=> nadp[c] + 23dhmp[c]	0.022228		KARA2	nadph[c] + h[c] + 2ahbut[c] <=> nadp[c] + 23dhmp[c]	0.00536965
LEUTA	leu-L[c] + akg[c] <=> glu-L[c] + 4mop[c]	-0.0538393		LEUTA	leu-L[c] + akg[c] <=> glu-L[c] + 4mop[c]	-0.0630081		LEUTA	leu-L[c] + akg[c] <=> glu-L[c] + 4mop[c]	-0.0374111		LEUTA	leu-L[c] + akg[c] <=> glu-L[c] + 4mop[c]	-0.0125165		LEUTA	leu-L[c] + akg[c] <=> glu-L[c] + 4mop[c]	-0.0323013		LEUTA	leu-L[c] + akg[c] <=> glu-L[c] + 4mop[c]	-0.00780309
LYSAM	lys-L[c] <=> 36dahx[c]	0		LYSAM	lys-L[c] <=> 36dahx[c]	0		LYSAM	lys-L[c] <=> 36dahx[c]	0		LYSAM	lys-L[c] <=> 36dahx[c]	0		LYSAM	lys-L[c] <=> 36dahx[c]	0		LYSAM	lys-L[c] <=> 36dahx[c]	0
LYSDC	lys-L[c] + h[c] -> co2[c] + 15dap[c]	0		LYSDC	lys-L[c] + h[c] -> co2[c] + 15dap[c]	0		LYSDC	lys-L[c] + h[c] -> co2[c] + 15dap[c]	0		LYSDC	lys-L[c] + h[c] -> co2[c] + 15dap[c]	0		LYSDC	lys-L[c] + h[c] -> co2[c] + 15dap[c]	0		LYSDC	lys-L[c] + h[c] -> co2[c] + 15dap[c]	0
METACH	h2s[c] + achms[c] -> h[c] + ac[c] + hcys-L[c]	1000		METACH	h2s[c] + achms[c] -> h[c] + ac[c] + hcys-L[c]	1000		METACH	h2s[c] + achms[c] -> h[c] + ac[c] + hcys-L[c]	1000		METACH	h2s[c] + achms[c] -> h[c] + ac[c] + hcys-L[c]	1000		METACH	h2s[c] + achms[c] -> h[c] + ac[c] + hcys-L[c]	1000		METACH	h2s[c] + achms[c] -> h[c] + ac[c] + hcys-L[c]	0
METAT	h2o[c] + atp[c] + met-L[c] -> ppi[c] + pi[c] + amet[c]	0.00113614		METAT	h2o[c] + atp[c] + met-L[c] -> ppi[c] + pi[c] + amet[c]	0.00132963		METAT	h2o[c] + atp[c] + met-L[c] -> ppi[c] + pi[c] + amet[c]	0.000789468		METAT	h2o[c] + atp[c] + met-L[c] -> ppi[c] + pi[c] + amet[c]	0.00026413		METAT	h2o[c] + atp[c] + met-L[c] -> ppi[c] + pi[c] + amet[c]	0.000681639		METAT	h2o[c] + atp[c] + met-L[c] -> ppi[c] + pi[c] + amet[c]	0.000164665
METB1r	cys-L[c] + achms[c] <=> h[c] + ac[c] + cysth-L[c]	-999.952		METB1r	cys-L[c] + achms[c] <=> h[c] + ac[c] + cysth-L[c]	-999.944		METB1r	cys-L[c] + achms[c] <=> h[c] + ac[c] + cysth-L[c]	-999.967		METB1r	cys-L[c] + achms[c] <=> h[c] + ac[c] + cysth-L[c]	-999.989		METB1r	cys-L[c] + achms[c] <=> h[c] + ac[c] + cysth-L[c]	-999.971		METB1r	cys-L[c] + achms[c] <=> h[c] + ac[c] + cysth-L[c]	0.00692389
METS	5mthf[c] + hcys-L[c] <=> met-L[c] + thf[c]	0.01186		METS	5mthf[c] + hcys-L[c] <=> met-L[c] + thf[c]	0.0138797		METS	5mthf[c] + hcys-L[c] <=> met-L[c] + thf[c]	0.00824107		METS	5mthf[c] + hcys-L[c] <=> met-L[c] + thf[c]	0.00275719		METS	5mthf[c] + hcys-L[c] <=> met-L[c] + thf[c]	0.00711547		METS	5mthf[c] + hcys-L[c] <=> met-L[c] + thf[c]	0.0017189
MTRI	5mdr1p[c] <=> 5mdru1p[c]	0		MTRI	5mdr1p[c] <=> 5mdru1p[c]	0		MTRI	5mdr1p[c] <=> 5mdru1p[c]	0		MTRI	5mdr1p[c] <=> 5mdru1p[c]	0		MTRI	5mdr1p[c] <=> 5mdru1p[c]	0		MTRI	5mdr1p[c] <=> 5mdru1p[c]	0
OCBT	orn[c] + cbp[c] <=> pi[c] + 2 h[c] + citr-L[c]	0.032925		OCBT	orn[c] + cbp[c] <=> pi[c] + 2 h[c] + citr-L[c]	0.0385321		OCBT	orn[c] + cbp[c] <=> pi[c] + 2 h[c] + citr-L[c]	0.0228784		OCBT	orn[c] + cbp[c] <=> pi[c] + 2 h[c] + citr-L[c]	0.00765437		OCBT	orn[c] + cbp[c] <=> pi[c] + 2 h[c] + citr-L[c]	0.0197536		OCBT	orn[c] + cbp[c] <=> pi[c] + 2 h[c] + citr-L[c]	0.00477192
OMCDC	h[c] + 3c4mop[c] -> co2[c] + 4mop[c]	0.0633587		OMCDC	h[c] + 3c4mop[c] -> co2[c] + 4mop[c]	0.0741485		OMCDC	h[c] + 3c4mop[c] -> co2[c] + 4mop[c]	0.0440257		OMCDC	h[c] + 3c4mop[c] -> co2[c] + 4mop[c]	0.0147295		OMCDC	h[c] + 3c4mop[c] -> co2[c] + 4mop[c]	0.0380125		OMCDC	h[c] + 3c4mop[c] -> co2[c] + 4mop[c]	0.00918276
ORNDC	h[c] + orn[c] -> co2[c] + ptrc[c]	0		ORNDC	h[c] + orn[c] -> co2[c] + ptrc[c]	0		ORNDC	h[c] + orn[c] -> co2[c] + ptrc[c]	0		ORNDC	h[c] + orn[c] -> co2[c] + ptrc[c]	0		ORNDC	h[c] + orn[c] -> co2[c] + ptrc[c]	0		ORNDC	h[c] + orn[c] -> co2[c] + ptrc[c]	0
ORNTAC	glu-L[c] + acorn[c] <=> acglu[c] + orn[c]	0.032925		ORNTAC	glu-L[c] + acorn[c] <=> acglu[c] + orn[c]	0.0385321		ORNTAC	glu-L[c] + acorn[c] <=> acglu[c] + orn[c]	0.0228784		ORNTAC	glu-L[c] + acorn[c] <=> acglu[c] + orn[c]	0.00765437		ORNTAC	glu-L[c] + acorn[c] <=> acglu[c] + orn[c]	0.0197536		ORNTAC	glu-L[c] + acorn[c] <=> acglu[c] + orn[c]	0.00477192
P5CR	pro-L[c] + nad[c] <=> h[c] + nadh[c] + 1pyr5c[c]	-0.0240098		P5CR	pro-L[c] + nad[c] <=> h[c] + nadh[c] + 1pyr5c[c]	-0.0280986		P5CR	pro-L[c] + nad[c] <=> h[c] + nadh[c] + 1pyr5c[c]	-0.0166835		P5CR	pro-L[c] + nad[c] <=> h[c] + nadh[c] + 1pyr5c[c]	-0.00558176		P5CR	pro-L[c] + nad[c] <=> h[c] + nadh[c] + 1pyr5c[c]	-0.0144048		P5CR	pro-L[c] + nad[c] <=> h[c] + nadh[c] + 1pyr5c[c]	-0.0034798
PGCDr	nad[c] + 3pg[c] <=> h[c] + nadh[c] + 3php[c]	0.108565		PGCDr	nad[c] + 3pg[c] <=> h[c] + nadh[c] + 3php[c]	0.127054		PGCDr	nad[c] + 3pg[c] <=> h[c] + nadh[c] + 3php[c]	0.0754384		PGCDr	nad[c] + 3pg[c] <=> h[c] + nadh[c] + 3php[c]	0.0252392		PGCDr	nad[c] + 3pg[c] <=> h[c] + nadh[c] + 3php[c]	0.0651347		PGCDr	nad[c] + 3pg[c] <=> h[c] + nadh[c] + 3php[c]	0.0157347
PHETA1	phe-L[c] + akg[c] <=> glu-L[c] + phpyr[c]	-0.0164277		PHETA1	phe-L[c] + akg[c] <=> glu-L[c] + phpyr[c]	-0.0192253		PHETA1	phe-L[c] + akg[c] <=> glu-L[c] + phpyr[c]	-0.0114151		PHETA1	phe-L[c] + akg[c] <=> glu-L[c] + phpyr[c]	-0.0038191		PHETA1	phe-L[c] + akg[c] <=> glu-L[c] + phpyr[c]	-0.00985594		PHETA1	phe-L[c] + akg[c] <=> glu-L[c] + phpyr[c]	-0.00238092
PPND	nad[c] + pphn[c] -> nadh[c] + co2[c] + 34hpp[c]	0.0145728		PPND	nad[c] + pphn[c] -> nadh[c] + co2[c] + 34hpp[c]	0.0170545		PPND	nad[c] + pphn[c] -> nadh[c] + co2[c] + 34hpp[c]	0.0101261		PPND	nad[c] + pphn[c] -> nadh[c] + co2[c] + 34hpp[c]	0.00338787		PPND	nad[c] + pphn[c] -> nadh[c] + co2[c] + 34hpp[c]	0.00874306		PPND	nad[c] + pphn[c] -> nadh[c] + co2[c] + 34hpp[c]	0.00211208
PPNDH	h[c] + pphn[c] -> h2o[c] + co2[c] + phpyr[c]	0.0164277		PPNDH	h[c] + pphn[c] -> h2o[c] + co2[c] + phpyr[c]	0.0192253		PPNDH	h[c] + pphn[c] -> h2o[c] + co2[c] + phpyr[c]	0.0114151		PPNDH	h[c] + pphn[c] -> h2o[c] + co2[c] + phpyr[c]	0.0038191		PPNDH	h[c] + pphn[c] -> h2o[c] + co2[c] + phpyr[c]	0.00985594		PPNDH	h[c] + pphn[c] -> h2o[c] + co2[c] + phpyr[c]	0.00238092
PRAI	pran[c] <=> 2cpr5p[c]	0.00542567		PRAI	pran[c] <=> 2cpr5p[c]	0.00634965		PRAI	pran[c] <=> 2cpr5p[c]	0.00377011		PRAI	pran[c] <=> 2cpr5p[c]	0.00126135		PRAI	pran[c] <=> 2cpr5p[c]	0.00325517		PRAI	pran[c] <=> 2cpr5p[c]	0.000786358
PRAMPC	h2o[c] + prbamp[c] <=> prfp[c]	0.00838197		PRAMPC	h2o[c] + prbamp[c] <=> prfp[c]	0.00980939		PRAMPC	h2o[c] + prbamp[c] <=> prfp[c]	0.00582434		PRAMPC	h2o[c] + prbamp[c] <=> prfp[c]	0.00194863		PRAMPC	h2o[c] + prbamp[c] <=> prfp[c]	0.00502882		PRAMPC	h2o[c] + prbamp[c] <=> prfp[c]	0.00121482
PRATPP	h2o[c] + prbatp[c] -> ppi[c] + prbamp[c]	0.00838197		PRATPP	h2o[c] + prbatp[c] -> ppi[c] + prbamp[c]	0.00980939		PRATPP	h2o[c] + prbatp[c] -> ppi[c] + prbamp[c]	0.00582434		PRATPP	h2o[c] + prbatp[c] -> ppi[c] + prbamp[c]	0.00194863		PRATPP	h2o[c] + prbatp[c] -> ppi[c] + prbamp[c]	0.00502882		PRATPP	h2o[c] + prbatp[c] -> ppi[c] + prbamp[c]	0.00121482
PRMICI	prfp[c] <=> prlp[c]	0.00838197		PRMICI	prfp[c] <=> prlp[c]	0.00980939		PRMICI	prfp[c] <=> prlp[c]	0.00582434		PRMICI	prfp[c] <=> prlp[c]	0.00194863		PRMICI	prfp[c] <=> prlp[c]	0.00502882		PRMICI	prfp[c] <=> prlp[c]	0.00121482
PSCVT	pep[c] + skm5p[c] <=> pi[c] + h[c] + 3psme[c]	0.0368667		PSCVT	pep[c] + skm5p[c] <=> pi[c] + h[c] + 3psme[c]	0.0431451		PSCVT	pep[c] + skm5p[c] <=> pi[c] + h[c] + 3psme[c]	0.0256174		PSCVT	pep[c] + skm5p[c] <=> pi[c] + h[c] + 3psme[c]	0.00857073		PSCVT	pep[c] + skm5p[c] <=> pi[c] + h[c] + 3psme[c]	0.0221185		PSCVT	pep[c] + skm5p[c] <=> pi[c] + h[c] + 3psme[c]	0.0053432
PSP_L	h2o[c] + pser-L[c] -> ser-L[c] + pi[c] + h[c]	0.108565		PSP_L	h2o[c] + pser-L[c] -> ser-L[c] + pi[c] + h[c]	0.127054		PSP_L	h2o[c] + pser-L[c] -> ser-L[c] + pi[c] + h[c]	0.0754384		PSP_L	h2o[c] + pser-L[c] -> ser-L[c] + pi[c] + h[c]	0.0252392		PSP_L	h2o[c] + pser-L[c] -> ser-L[c] + pi[c] + h[c]	0.0651347		PSP_L	h2o[c] + pser-L[c] -> ser-L[c] + pi[c] + h[c]	0.0157347
SDPDS	h2o[c] + sl26da[c] -> 26dap-LL[c] + succ[c]	0.0327511		SDPDS	h2o[c] + sl26da[c] -> 26dap-LL[c] + succ[c]	0.0383285		SDPDS	h2o[c] + sl26da[c] -> 26dap-LL[c] + succ[c]	0.0227576		SDPDS	h2o[c] + sl26da[c] -> 26dap-LL[c] + succ[c]	0.00761394		SDPDS	h2o[c] + sl26da[c] -> 26dap-LL[c] + succ[c]	0.0196493		SDPDS	h2o[c] + sl26da[c] -> 26dap-LL[c] + succ[c]	0.00474671
SDPTA	akg[c] + sl26da[c] <=> glu-L[c] + sl2a6o[c]	-0.0327511		SDPTA	akg[c] + sl26da[c] <=> glu-L[c] + sl2a6o[c]	-0.0383285		SDPTA	akg[c] + sl26da[c] <=> glu-L[c] + sl2a6o[c]	-0.0227576		SDPTA	akg[c] + sl26da[c] <=> glu-L[c] + sl2a6o[c]	-0.00761394		SDPTA	akg[c] + sl26da[c] <=> glu-L[c] + sl2a6o[c]	-0.0196493		SDPTA	akg[c] + sl26da[c] <=> glu-L[c] + sl2a6o[c]	-0.00474671
SERAT	ser-L[c] + accoa[c] -> coa[c] + acser[c]	0.00571834		SERAT	ser-L[c] + accoa[c] -> coa[c] + acser[c]	0.00669216		SERAT	ser-L[c] + accoa[c] -> coa[c] + acser[c]	0.00397348		SERAT	ser-L[c] + accoa[c] -> coa[c] + acser[c]	0.00132939		SERAT	ser-L[c] + accoa[c] -> coa[c] + acser[c]	0.00343076		SERAT	ser-L[c] + accoa[c] -> coa[c] + acser[c]	0.000828776
SERD_Lr	ser-L[c] -> pyr[c] + nh4[c]	0		SERD_Lr	ser-L[c] -> pyr[c] + nh4[c]	0		SERD_Lr	ser-L[c] -> pyr[c] + nh4[c]	0		SERD_Lr	ser-L[c] -> pyr[c] + nh4[c]	0		SERD_Lr	ser-L[c] -> pyr[c] + nh4[c]	0		SERD_Lr	ser-L[c] -> pyr[c] + nh4[c]	0
SHK3D	nadp[c] + skm[c] <=> nadph[c] + h[c] + 3dhsk[c]	-0.0368667		SHK3D	nadp[c] + skm[c] <=> nadph[c] + h[c] + 3dhsk[c]	-0.0431451		SHK3D	nadp[c] + skm[c] <=> nadph[c] + h[c] + 3dhsk[c]	-0.0256174		SHK3D	nadp[c] + skm[c] <=> nadph[c] + h[c] + 3dhsk[c]	-0.00857073		SHK3D	nadp[c] + skm[c] <=> nadph[c] + h[c] + 3dhsk[c]	-0.0221185		SHK3D	nadp[c] + skm[c] <=> nadph[c] + h[c] + 3dhsk[c]	-0.0053432
SHKK	atp[c] + skm[c] <=> adp[c] + skm5p[c]	0.0368667		SHKK	atp[c] + skm[c] <=> adp[c] + skm5p[c]	0.0431451		SHKK	atp[c] + skm[c] <=> adp[c] + skm5p[c]	0.0256174		SHKK	atp[c] + skm[c] <=> adp[c] + skm5p[c]	0.00857073		SHKK	atp[c] + skm[c] <=> adp[c] + skm5p[c]	0.0221185		SHKK	atp[c] + skm[c] <=> adp[c] + skm5p[c]	0.0053432
SHSL1	h[c] + cysth-L[c] + succ[c] <=> cys-L[c] + suchms[c]	-999.952		SHSL1	h[c] + cysth-L[c] + succ[c] <=> cys-L[c] + suchms[c]	-999.944		SHSL1	h[c] + cysth-L[c] + succ[c] <=> cys-L[c] + suchms[c]	-999.967		SHSL1	h[c] + cysth-L[c] + succ[c] <=> cys-L[c] + suchms[c]	-999.989		SHSL1	h[c] + cysth-L[c] + succ[c] <=> cys-L[c] + suchms[c]	-999.971		SHSL1	h[c] + cysth-L[c] + succ[c] <=> cys-L[c] + suchms[c]	0.00692389
SHSL2r	h2s[c] + suchms[c] <=> h[c] + hcys-L[c] + succ[c]	-999.989		SHSL2r	h2s[c] + suchms[c] <=> h[c] + hcys-L[c] + succ[c]	-999.987		SHSL2r	h2s[c] + suchms[c] <=> h[c] + hcys-L[c] + succ[c]	-999.993		SHSL2r	h2s[c] + suchms[c] <=> h[c] + hcys-L[c] + succ[c]	-999.998		SHSL2r	h2s[c] + suchms[c] <=> h[c] + hcys-L[c] + succ[c]	-999.994		SHSL2r	h2s[c] + suchms[c] <=> h[c] + hcys-L[c] + succ[c]	0.00155423
SHSL4r	h2o[c] + suchms[c] -> h[c] + 2obut[c] + nh4[c] + succ[c]	0.0370492		SHSL4r	h2o[c] + suchms[c] -> h[c] + 2obut[c] + nh4[c] + succ[c]	0.0433586		SHSL4r	h2o[c] + suchms[c] -> h[c] + 2obut[c] + nh4[c] + succ[c]	0.0257442		SHSL4r	h2o[c] + suchms[c] -> h[c] + 2obut[c] + nh4[c] + succ[c]	0.00861316		SHSL4r	h2o[c] + suchms[c] -> h[c] + 2obut[c] + nh4[c] + succ[c]	0.022228		SHSL4r	h2o[c] + suchms[c] -> h[c] + 2obut[c] + nh4[c] + succ[c]	0.00536965
SPMS	ametam[c] + ptrc[c] <=> h[c] + 5mta[c] + spmd[c]	0		SPMS	ametam[c] + ptrc[c] <=> h[c] + 5mta[c] + spmd[c]	0		SPMS	ametam[c] + ptrc[c] <=> h[c] + 5mta[c] + spmd[c]	0		SPMS	ametam[c] + ptrc[c] <=> h[c] + 5mta[c] + spmd[c]	0		SPMS	ametam[c] + ptrc[c] <=> h[c] + 5mta[c] + spmd[c]	0		SPMS	ametam[c] + ptrc[c] <=> h[c] + 5mta[c] + spmd[c]	0
THDPS	h2o[c] + succoa[c] + thdp[c] -> coa[c] + sl2a6o[c]	0.0327511		THDPS	h2o[c] + succoa[c] + thdp[c] -> coa[c] + sl2a6o[c]	0.0383285		THDPS	h2o[c] + succoa[c] + thdp[c] -> coa[c] + sl2a6o[c]	0.0227576		THDPS	h2o[c] + succoa[c] + thdp[c] -> coa[c] + sl2a6o[c]	0.00761394		THDPS	h2o[c] + succoa[c] + thdp[c] -> coa[c] + sl2a6o[c]	0.0196493		THDPS	h2o[c] + succoa[c] + thdp[c] -> coa[c] + sl2a6o[c]	0.00474671
THRS	h2o[c] + phom[c] -> thr-L[c] + pi[c] + h[c]	0.0240909		THRS	h2o[c] + phom[c] -> thr-L[c] + pi[c] + h[c]	0.0281935		THRS	h2o[c] + phom[c] -> thr-L[c] + pi[c] + h[c]	0.0167399		THRS	h2o[c] + phom[c] -> thr-L[c] + pi[c] + h[c]	0.00560062		THRS	h2o[c] + phom[c] -> thr-L[c] + pi[c] + h[c]	0.0144535		THRS	h2o[c] + phom[c] -> thr-L[c] + pi[c] + h[c]	0.00349157
TRPS1	ser-L[c] + 3ig3p[c] <=> h2o[c] + trp-L[c] + g3p[c]	1000		TRPS1	ser-L[c] + 3ig3p[c] <=> h2o[c] + trp-L[c] + g3p[c]	-999.994		TRPS1	ser-L[c] + 3ig3p[c] <=> h2o[c] + trp-L[c] + g3p[c]	-999.996		TRPS1	ser-L[c] + 3ig3p[c] <=> h2o[c] + trp-L[c] + g3p[c]	-999.999		TRPS1	ser-L[c] + 3ig3p[c] <=> h2o[c] + trp-L[c] + g3p[c]	-999.997		TRPS1	ser-L[c] + 3ig3p[c] <=> h2o[c] + trp-L[c] + g3p[c]	1000
TYRTA	tyr-L[c] + akg[c] <=> glu-L[c] + 34hpp[c]	-0.0145728		TYRTA	tyr-L[c] + akg[c] <=> glu-L[c] + 34hpp[c]	-0.0170545		TYRTA	tyr-L[c] + akg[c] <=> glu-L[c] + 34hpp[c]	-0.0101261		TYRTA	tyr-L[c] + akg[c] <=> glu-L[c] + 34hpp[c]	-0.00338787		TYRTA	tyr-L[c] + akg[c] <=> glu-L[c] + 34hpp[c]	-0.00874306		TYRTA	tyr-L[c] + akg[c] <=> glu-L[c] + 34hpp[c]	-0.00211208
VALTA	val-L[c] + akg[c] <=> glu-L[c] + 3mob[c]	-0.0366696		VALTA	val-L[c] + akg[c] <=> glu-L[c] + 3mob[c]	-0.0429144		VALTA	val-L[c] + akg[c] <=> glu-L[c] + 3mob[c]	-0.0254805		VALTA	val-L[c] + akg[c] <=> glu-L[c] + 3mob[c]	-0.00852492		VALTA	val-L[c] + akg[c] <=> glu-L[c] + 3mob[c]	-0.0220002		VALTA	val-L[c] + akg[c] <=> glu-L[c] + 3mob[c]	-0.00531464
GALT	utp[c] + gal1p[c] <=> ppi[c] + udpgal[c]	0		GALT	utp[c] + gal1p[c] <=> ppi[c] + udpgal[c]	0		GALT	utp[c] + gal1p[c] <=> ppi[c] + udpgal[c]	0		GALT	utp[c] + gal1p[c] <=> ppi[c] + udpgal[c]	0		GALT	utp[c] + gal1p[c] <=> ppi[c] + udpgal[c]	0		GALT	utp[c] + gal1p[c] <=> ppi[c] + udpgal[c]	0
GALU	utp[c] + g1p[c] <=> ppi[c] + udpg[c]	0.0290065		GALU	utp[c] + g1p[c] <=> ppi[c] + udpg[c]	0.0339462		GALU	utp[c] + g1p[c] <=> ppi[c] + udpg[c]	0.0201556		GALU	utp[c] + g1p[c] <=> ppi[c] + udpg[c]	0.00674339		GALU	utp[c] + g1p[c] <=> ppi[c] + udpg[c]	0.0174027		GALU	utp[c] + g1p[c] <=> ppi[c] + udpg[c]	0.00420399
GLYCK	atp[c] + glyc-R[c] <=> adp[c] + 3pg[c]	0		GLYCK	atp[c] + glyc-R[c] <=> adp[c] + 3pg[c]	0		GLYCK	atp[c] + glyc-R[c] <=> adp[c] + 3pg[c]	0		GLYCK	atp[c] + glyc-R[c] <=> adp[c] + 3pg[c]	0		GLYCK	atp[c] + glyc-R[c] <=> adp[c] + 3pg[c]	0		GLYCK	atp[c] + glyc-R[c] <=> adp[c] + 3pg[c]	0
SPODM	2 h[c] + 2 o2s[c] -> h2o2[c] + o2[c]	0		SPODM	2 h[c] + 2 o2s[c] -> h2o2[c] + o2[c]	0		SPODM	2 h[c] + 2 o2s[c] -> h2o2[c] + o2[c]	0		SPODM	2 h[c] + 2 o2s[c] -> h2o2[c] + o2[c]	0		SPODM	2 h[c] + 2 o2s[c] -> h2o2[c] + o2[c]	0		SPODM	2 h[c] + 2 o2s[c] -> h2o2[c] + o2[c]	0
PPAKr	atp[c] + h[c] + ppa[c] <=> adp[c] + ppap[c]	0		PPAKr	atp[c] + h[c] + ppa[c] <=> adp[c] + ppap[c]	0		PPAKr	atp[c] + h[c] + ppa[c] <=> adp[c] + ppap[c]	0		PPAKr	atp[c] + h[c] + ppa[c] <=> adp[c] + ppap[c]	0		PPAKr	atp[c] + h[c] + ppa[c] <=> adp[c] + ppap[c]	0		PPAKr	atp[c] + h[c] + ppa[c] <=> adp[c] + ppap[c]	0
TGBPA	tagdp-D[c] <=> g3p[c] + dhap[c]	0		TGBPA	tagdp-D[c] <=> g3p[c] + dhap[c]	0		TGBPA	tagdp-D[c] <=> g3p[c] + dhap[c]	0		TGBPA	tagdp-D[c] <=> g3p[c] + dhap[c]	0		TGBPA	tagdp-D[c] <=> g3p[c] + dhap[c]	0		TGBPA	tagdp-D[c] <=> g3p[c] + dhap[c]	0
UDPG4E	udpg[c] <=> udpgal[c]	0		UDPG4E	udpg[c] <=> udpgal[c]	0		UDPG4E	udpg[c] <=> udpgal[c]	0		UDPG4E	udpg[c] <=> udpgal[c]	0		UDPG4E	udpg[c] <=> udpgal[c]	0		UDPG4E	udpg[c] <=> udpgal[c]	0
ACGAMT	uacgam[c] + udcpp[c] <=> ump[c] + unaga[c]	0		ACGAMT	uacgam[c] + udcpp[c] <=> ump[c] + unaga[c]	0		ACGAMT	uacgam[c] + udcpp[c] <=> ump[c] + unaga[c]	0		ACGAMT	uacgam[c] + udcpp[c] <=> ump[c] + unaga[c]	0		ACGAMT	uacgam[c] + udcpp[c] <=> ump[c] + unaga[c]	0		ACGAMT	uacgam[c] + udcpp[c] <=> ump[c] + unaga[c]	0
AGPAT120	ddcaACP[c] + 1ddecg3p[c] -> ACP[c] + pa120[c]	0		AGPAT120	ddcaACP[c] + 1ddecg3p[c] -> ACP[c] + pa120[c]	0		AGPAT120	ddcaACP[c] + 1ddecg3p[c] -> ACP[c] + pa120[c]	0		AGPAT120	ddcaACP[c] + 1ddecg3p[c] -> ACP[c] + pa120[c]	0		AGPAT120	ddcaACP[c] + 1ddecg3p[c] -> ACP[c] + pa120[c]	0		AGPAT120	ddcaACP[c] + 1ddecg3p[c] -> ACP[c] + pa120[c]	0
AGPAT140	myrsACP[c] + 1tdecg3p[c] -> ACP[c] + pa140[c]	0		AGPAT140	myrsACP[c] + 1tdecg3p[c] -> ACP[c] + pa140[c]	0		AGPAT140	myrsACP[c] + 1tdecg3p[c] -> ACP[c] + pa140[c]	0		AGPAT140	myrsACP[c] + 1tdecg3p[c] -> ACP[c] + pa140[c]	0		AGPAT140	myrsACP[c] + 1tdecg3p[c] -> ACP[c] + pa140[c]	0		AGPAT140	myrsACP[c] + 1tdecg3p[c] -> ACP[c] + pa140[c]	0
AGPAT160	palmACP[c] + 1hdecg3p[c] -> ACP[c] + pa160[c]	0		AGPAT160	palmACP[c] + 1hdecg3p[c] -> ACP[c] + pa160[c]	0		AGPAT160	palmACP[c] + 1hdecg3p[c] -> ACP[c] + pa160[c]	0		AGPAT160	palmACP[c] + 1hdecg3p[c] -> ACP[c] + pa160[c]	0		AGPAT160	palmACP[c] + 1hdecg3p[c] -> ACP[c] + pa160[c]	0		AGPAT160	palmACP[c] + 1hdecg3p[c] -> ACP[c] + pa160[c]	0
AGPAT161	1hdec9eg3p[c] + hdeACP[c] -> ACP[c] + pa161[c]	0		AGPAT161	1hdec9eg3p[c] + hdeACP[c] -> ACP[c] + pa161[c]	0		AGPAT161	1hdec9eg3p[c] + hdeACP[c] -> ACP[c] + pa161[c]	0		AGPAT161	1hdec9eg3p[c] + hdeACP[c] -> ACP[c] + pa161[c]	0		AGPAT161	1hdec9eg3p[c] + hdeACP[c] -> ACP[c] + pa161[c]	0		AGPAT161	1hdec9eg3p[c] + hdeACP[c] -> ACP[c] + pa161[c]	0
AGPAT180	ocdcaACP[c] + 1odecg3p[c] -> ACP[c] + pa180[c]	0		AGPAT180	ocdcaACP[c] + 1odecg3p[c] -> ACP[c] + pa180[c]	0		AGPAT180	ocdcaACP[c] + 1odecg3p[c] -> ACP[c] + pa180[c]	0		AGPAT180	ocdcaACP[c] + 1odecg3p[c] -> ACP[c] + pa180[c]	0		AGPAT180	ocdcaACP[c] + 1odecg3p[c] -> ACP[c] + pa180[c]	0		AGPAT180	ocdcaACP[c] + 1odecg3p[c] -> ACP[c] + pa180[c]	0
AGPAT181	octeACP[c] + 1odec11eg3p[c] -> ACP[c] + pa181[c]	0		AGPAT181	octeACP[c] + 1odec11eg3p[c] -> ACP[c] + pa181[c]	0		AGPAT181	octeACP[c] + 1odec11eg3p[c] -> ACP[c] + pa181[c]	0		AGPAT181	octeACP[c] + 1odec11eg3p[c] -> ACP[c] + pa181[c]	0		AGPAT181	octeACP[c] + 1odec11eg3p[c] -> ACP[c] + pa181[c]	0		AGPAT181	octeACP[c] + 1odec11eg3p[c] -> ACP[c] + pa181[c]	0
AMAA	h2o[c] + acmama[c] <=> ala-L[c] + acmam[c]	0		AMAA	h2o[c] + acmama[c] <=> ala-L[c] + acmam[c]	0		AMAA	h2o[c] + acmama[c] <=> ala-L[c] + acmam[c]	0		AMAA	h2o[c] + acmama[c] <=> ala-L[c] + acmam[c]	0		AMAA	h2o[c] + acmama[c] <=> ala-L[c] + acmam[c]	0		AMAA	h2o[c] + acmama[c] <=> ala-L[c] + acmam[c]	0
AGPATr_MT	1ag3p_MT[c] + 0.0127 tdcoa[c] + 0.3812 fa3coa[c] + 0.023 fa4coa[c] + 0.2133 pmtcoa[c] + 0.3 fa12coa[c] + 0.0191 hdcoa[c] + 0.0372 stcoa[c] + 0.0134 odecoa[c] <=> coa[c] + 12dag3p_MT[c]	0.012486		AGPATr_MT	1ag3p_MT[c] + 0.0127 tdcoa[c] + 0.3812 fa3coa[c] + 0.023 fa4coa[c] + 0.2133 pmtcoa[c] + 0.3 fa12coa[c] + 0.0191 hdcoa[c] + 0.0372 stcoa[c] + 0.0134 odecoa[c] <=> coa[c] + 12dag3p_MT[c]	0.0146123		AGPATr_MT	1ag3p_MT[c] + 0.0127 tdcoa[c] + 0.3812 fa3coa[c] + 0.023 fa4coa[c] + 0.2133 pmtcoa[c] + 0.3 fa12coa[c] + 0.0191 hdcoa[c] + 0.0372 stcoa[c] + 0.0134 odecoa[c] <=> coa[c] + 12dag3p_MT[c]	0.00867609		AGPATr_MT	1ag3p_MT[c] + 0.0127 tdcoa[c] + 0.3812 fa3coa[c] + 0.023 fa4coa[c] + 0.2133 pmtcoa[c] + 0.3 fa12coa[c] + 0.0191 hdcoa[c] + 0.0372 stcoa[c] + 0.0134 odecoa[c] <=> coa[c] + 12dag3p_MT[c]	0.00290273		AGPATr_MT	1ag3p_MT[c] + 0.0127 tdcoa[c] + 0.3812 fa3coa[c] + 0.023 fa4coa[c] + 0.2133 pmtcoa[c] + 0.3 fa12coa[c] + 0.0191 hdcoa[c] + 0.0372 stcoa[c] + 0.0134 odecoa[c] <=> coa[c] + 12dag3p_MT[c]	0.00749107		AGPATr_MT	1ag3p_MT[c] + 0.0127 tdcoa[c] + 0.3812 fa3coa[c] + 0.023 fa4coa[c] + 0.2133 pmtcoa[c] + 0.3 fa12coa[c] + 0.0191 hdcoa[c] + 0.0372 stcoa[c] + 0.0134 odecoa[c] <=> coa[c] + 12dag3p_MT[c]	0.00180963
CDGPT_MT	cdpdag_MT[c] + glyc3p[c] -> cmp[c] + h[c] + pglyp_MT[c]	0.002423		CDGPT_MT	cdpdag_MT[c] + glyc3p[c] -> cmp[c] + h[c] + pglyp_MT[c]	0.00283563		CDGPT_MT	cdpdag_MT[c] + glyc3p[c] -> cmp[c] + h[c] + pglyp_MT[c]	0.00168366		CDGPT_MT	cdpdag_MT[c] + glyc3p[c] -> cmp[c] + h[c] + pglyp_MT[c]	0.000563297		CDGPT_MT	cdpdag_MT[c] + glyc3p[c] -> cmp[c] + h[c] + pglyp_MT[c]	0.0014537		CDGPT_MT	cdpdag_MT[c] + glyc3p[c] -> cmp[c] + h[c] + pglyp_MT[c]	0.000351173
CDPDSP_MT	ser-L[c] + cdpdag_MT[c] -> cmp[c] + h[c] + ps_MT[c]	0.00651544		CDPDSP_MT	ser-L[c] + cdpdag_MT[c] -> cmp[c] + h[c] + ps_MT[c]	0.00762501		CDPDSP_MT	ser-L[c] + cdpdag_MT[c] -> cmp[c] + h[c] + ps_MT[c]	0.00452735		CDPDSP_MT	ser-L[c] + cdpdag_MT[c] -> cmp[c] + h[c] + ps_MT[c]	0.0015147		CDPDSP_MT	ser-L[c] + cdpdag_MT[c] -> cmp[c] + h[c] + ps_MT[c]	0.00390899		CDPDSP_MT	ser-L[c] + cdpdag_MT[c] -> cmp[c] + h[c] + ps_MT[c]	0.000944302
CLPNS2_MT	2 pgly_MT[c] -> cdlp_MT[c] + glyc[c]	5.79666e-05		CLPNS2_MT	2 pgly_MT[c] -> cdlp_MT[c] + glyc[c]	6.78381e-05		CLPNS2_MT	2 pgly_MT[c] -> cdlp_MT[c] + glyc[c]	4.0279e-05		CLPNS2_MT	2 pgly_MT[c] -> cdlp_MT[c] + glyc[c]	1.3476e-05		CLPNS2_MT	2 pgly_MT[c] -> cdlp_MT[c] + glyc[c]	3.47775e-05		CLPNS2_MT	2 pgly_MT[c] -> cdlp_MT[c] + glyc[c]	8.40126e-06
DAGK120	atp[c] + 12dgr120[c] <=> adp[c] + pa120[c]	0		DAGK120	atp[c] + 12dgr120[c] <=> adp[c] + pa120[c]	0		DAGK120	atp[c] + 12dgr120[c] <=> adp[c] + pa120[c]	0		DAGK120	atp[c] + 12dgr120[c] <=> adp[c] + pa120[c]	0		DAGK120	atp[c] + 12dgr120[c] <=> adp[c] + pa120[c]	0		DAGK120	atp[c] + 12dgr120[c] <=> adp[c] + pa120[c]	0
DAGK140	atp[c] + 12dgr140[c] <=> adp[c] + pa140[c]	0		DAGK140	atp[c] + 12dgr140[c] <=> adp[c] + pa140[c]	0		DAGK140	atp[c] + 12dgr140[c] <=> adp[c] + pa140[c]	0		DAGK140	atp[c] + 12dgr140[c] <=> adp[c] + pa140[c]	0		DAGK140	atp[c] + 12dgr140[c] <=> adp[c] + pa140[c]	0		DAGK140	atp[c] + 12dgr140[c] <=> adp[c] + pa140[c]	0
DAGK160	atp[c] + 12dgr160[c] <=> adp[c] + pa160[c]	0		DAGK160	atp[c] + 12dgr160[c] <=> adp[c] + pa160[c]	0		DAGK160	atp[c] + 12dgr160[c] <=> adp[c] + pa160[c]	0		DAGK160	atp[c] + 12dgr160[c] <=> adp[c] + pa160[c]	0		DAGK160	atp[c] + 12dgr160[c] <=> adp[c] + pa160[c]	0		DAGK160	atp[c] + 12dgr160[c] <=> adp[c] + pa160[c]	0
DAGK161	atp[c] + 12dgr161[c] <=> adp[c] + pa161[c]	0		DAGK161	atp[c] + 12dgr161[c] <=> adp[c] + pa161[c]	0		DAGK161	atp[c] + 12dgr161[c] <=> adp[c] + pa161[c]	0		DAGK161	atp[c] + 12dgr161[c] <=> adp[c] + pa161[c]	0		DAGK161	atp[c] + 12dgr161[c] <=> adp[c] + pa161[c]	0		DAGK161	atp[c] + 12dgr161[c] <=> adp[c] + pa161[c]	0
DAGK180	atp[c] + 12dgr180[c] <=> adp[c] + pa180[c]	0		DAGK180	atp[c] + 12dgr180[c] <=> adp[c] + pa180[c]	0		DAGK180	atp[c] + 12dgr180[c] <=> adp[c] + pa180[c]	0		DAGK180	atp[c] + 12dgr180[c] <=> adp[c] + pa180[c]	0		DAGK180	atp[c] + 12dgr180[c] <=> adp[c] + pa180[c]	0		DAGK180	atp[c] + 12dgr180[c] <=> adp[c] + pa180[c]	0
DAGK181	atp[c] + 12dgr181[c] <=> adp[c] + pa181[c]	0		DAGK181	atp[c] + 12dgr181[c] <=> adp[c] + pa181[c]	0		DAGK181	atp[c] + 12dgr181[c] <=> adp[c] + pa181[c]	0		DAGK181	atp[c] + 12dgr181[c] <=> adp[c] + pa181[c]	0		DAGK181	atp[c] + 12dgr181[c] <=> adp[c] + pa181[c]	0		DAGK181	atp[c] + 12dgr181[c] <=> adp[c] + pa181[c]	0
G1PACT	accoa[c] + gam1p[c] -> coa[c] + h[c] + acgam1p[c]	0.0378406		G1PACT	accoa[c] + gam1p[c] -> coa[c] + h[c] + acgam1p[c]	0.0442847		G1PACT	accoa[c] + gam1p[c] -> coa[c] + h[c] + acgam1p[c]	0.0262941		G1PACT	accoa[c] + gam1p[c] -> coa[c] + h[c] + acgam1p[c]	0.00879713		G1PACT	accoa[c] + gam1p[c] -> coa[c] + h[c] + acgam1p[c]	0.0227027		G1PACT	accoa[c] + gam1p[c] -> coa[c] + h[c] + acgam1p[c]	0.00548434
G3PCT	ctp[c] + h[c] + glyc3p[c] -> ppi[c] + cdpglyc[c]	0.0529698		G3PCT	ctp[c] + h[c] + glyc3p[c] -> ppi[c] + cdpglyc[c]	0.0619905		G3PCT	ctp[c] + h[c] + glyc3p[c] -> ppi[c] + cdpglyc[c]	0.0368069		G3PCT	ctp[c] + h[c] + glyc3p[c] -> ppi[c] + cdpglyc[c]	0.0123144		G3PCT	ctp[c] + h[c] + glyc3p[c] -> ppi[c] + cdpglyc[c]	0.0317797		G3PCT	ctp[c] + h[c] + glyc3p[c] -> ppi[c] + cdpglyc[c]	0.00767707
G3POA_MT	0.0127 tdcoa[c] + 0.3812 fa3coa[c] + 0.023 fa4coa[c] + 0.2133 pmtcoa[c] + 0.3 fa12coa[c] + 0.0191 hdcoa[c] + 0.0372 stcoa[c] + 0.0134 odecoa[c] + glyc3p[c] -> coa[c] + 1ag3p_MT[c]	0.012486		G3POA_MT	0.0127 tdcoa[c] + 0.3812 fa3coa[c] + 0.023 fa4coa[c] + 0.2133 pmtcoa[c] + 0.3 fa12coa[c] + 0.0191 hdcoa[c] + 0.0372 stcoa[c] + 0.0134 odecoa[c] + glyc3p[c] -> coa[c] + 1ag3p_MT[c]	0.0146123		G3POA_MT	0.0127 tdcoa[c] + 0.3812 fa3coa[c] + 0.023 fa4coa[c] + 0.2133 pmtcoa[c] + 0.3 fa12coa[c] + 0.0191 hdcoa[c] + 0.0372 stcoa[c] + 0.0134 odecoa[c] + glyc3p[c] -> coa[c] + 1ag3p_MT[c]	0.00867609		G3POA_MT	0.0127 tdcoa[c] + 0.3812 fa3coa[c] + 0.023 fa4coa[c] + 0.2133 pmtcoa[c] + 0.3 fa12coa[c] + 0.0191 hdcoa[c] + 0.0372 stcoa[c] + 0.0134 odecoa[c] + glyc3p[c] -> coa[c] + 1ag3p_MT[c]	0.00290273		G3POA_MT	0.0127 tdcoa[c] + 0.3812 fa3coa[c] + 0.023 fa4coa[c] + 0.2133 pmtcoa[c] + 0.3 fa12coa[c] + 0.0191 hdcoa[c] + 0.0372 stcoa[c] + 0.0134 odecoa[c] + glyc3p[c] -> coa[c] + 1ag3p_MT[c]	0.00749107		G3POA_MT	0.0127 tdcoa[c] + 0.3812 fa3coa[c] + 0.023 fa4coa[c] + 0.2133 pmtcoa[c] + 0.3 fa12coa[c] + 0.0191 hdcoa[c] + 0.0372 stcoa[c] + 0.0134 odecoa[c] + glyc3p[c] -> coa[c] + 1ag3p_MT[c]	0.00180963
GF6PTA	gln-L[c] + f6p[c] <=> glu-L[c] + gam6p[c]	0.0378406		GF6PTA	gln-L[c] + f6p[c] <=> glu-L[c] + gam6p[c]	0.0442847		GF6PTA	gln-L[c] + f6p[c] <=> glu-L[c] + gam6p[c]	0.0262941		GF6PTA	gln-L[c] + f6p[c] <=> glu-L[c] + gam6p[c]	0.00879713		GF6PTA	gln-L[c] + f6p[c] <=> glu-L[c] + gam6p[c]	0.0227027		GF6PTA	gln-L[c] + f6p[c] <=> glu-L[c] + gam6p[c]	0.00548434
GLCP	pi[c] + glycogen[c] -> g1p[c]	0		GLCP	pi[c] + glycogen[c] -> g1p[c]	0		GLCP	pi[c] + glycogen[c] -> g1p[c]	0		GLCP	pi[c] + glycogen[c] -> g1p[c]	0		GLCP	pi[c] + glycogen[c] -> g1p[c]	0		GLCP	pi[c] + glycogen[c] -> g1p[c]	0
GLCS1	adpglc[c] -> h[c] + adp[c] + glycogen[c]	0		GLCS1	adpglc[c] -> h[c] + adp[c] + glycogen[c]	0		GLCS1	adpglc[c] -> h[c] + adp[c] + glycogen[c]	0		GLCS1	adpglc[c] -> h[c] + adp[c] + glycogen[c]	0		GLCS1	adpglc[c] -> h[c] + adp[c] + glycogen[c]	0		GLCS1	adpglc[c] -> h[c] + adp[c] + glycogen[c]	0
GLGC	atp[c] + h[c] + g1p[c] -> ppi[c] + adpglc[c]	0		GLGC	atp[c] + h[c] + g1p[c] -> ppi[c] + adpglc[c]	0		GLGC	atp[c] + h[c] + g1p[c] -> ppi[c] + adpglc[c]	0		GLGC	atp[c] + h[c] + g1p[c] -> ppi[c] + adpglc[c]	0		GLGC	atp[c] + h[c] + g1p[c] -> ppi[c] + adpglc[c]	0		GLGC	atp[c] + h[c] + g1p[c] -> ppi[c] + adpglc[c]	0
GLUR	glu-L[c] <=> glu-D[c]	0.011802		GLUR	glu-L[c] <=> glu-D[c]	0.0138118		GLUR	glu-L[c] <=> glu-D[c]	0.0082008		GLUR	glu-L[c] <=> glu-D[c]	0.00274371		GLUR	glu-L[c] <=> glu-D[c]	0.0070807		GLUR	glu-L[c] <=> glu-D[c]	0.0017105
HOPNTAL	pyr[c] + acald[c] <=> 4h2opntn[c]	0		HOPNTAL	pyr[c] + acald[c] <=> 4h2opntn[c]	0		HOPNTAL	pyr[c] + acald[c] <=> 4h2opntn[c]	0		HOPNTAL	pyr[c] + acald[c] <=> 4h2opntn[c]	0		HOPNTAL	pyr[c] + acald[c] <=> 4h2opntn[c]	0		HOPNTAL	pyr[c] + acald[c] <=> 4h2opntn[c]	0
LIPO1S24_MT	d12dg_MT[c] + 24 udpg[c] + 24 cdpglyc[c] -> 24 cmp[c] + lipo1_24_MT[c] + 48 h[c] + 24 udp[c]	8.11532e-05		LIPO1S24_MT	d12dg_MT[c] + 24 udpg[c] + 24 cdpglyc[c] -> 24 cmp[c] + lipo1_24_MT[c] + 48 h[c] + 24 udp[c]	9.49734e-05		LIPO1S24_MT	d12dg_MT[c] + 24 udpg[c] + 24 cdpglyc[c] -> 24 cmp[c] + lipo1_24_MT[c] + 48 h[c] + 24 udp[c]	5.63905e-05		LIPO1S24_MT	d12dg_MT[c] + 24 udpg[c] + 24 cdpglyc[c] -> 24 cmp[c] + lipo1_24_MT[c] + 48 h[c] + 24 udp[c]	1.88664e-05		LIPO1S24_MT	d12dg_MT[c] + 24 udpg[c] + 24 cdpglyc[c] -> 24 cmp[c] + lipo1_24_MT[c] + 48 h[c] + 24 udp[c]	4.86885e-05		LIPO1S24_MT	d12dg_MT[c] + 24 udpg[c] + 24 cdpglyc[c] -> 24 cmp[c] + lipo1_24_MT[c] + 48 h[c] + 24 udp[c]	1.17618e-05
LIPO2S24_MT	d12dg_MT[c] + 24 uacgam[c] + 24 cdpglyc[c] -> 24 cmp[c] + lipo2_24_MT[c] + 48 h[c] + 24 udp[c]	6.95599e-05		LIPO2S24_MT	d12dg_MT[c] + 24 uacgam[c] + 24 cdpglyc[c] -> 24 cmp[c] + lipo2_24_MT[c] + 48 h[c] + 24 udp[c]	8.14058e-05		LIPO2S24_MT	d12dg_MT[c] + 24 uacgam[c] + 24 cdpglyc[c] -> 24 cmp[c] + lipo2_24_MT[c] + 48 h[c] + 24 udp[c]	4.83347e-05		LIPO2S24_MT	d12dg_MT[c] + 24 uacgam[c] + 24 cdpglyc[c] -> 24 cmp[c] + lipo2_24_MT[c] + 48 h[c] + 24 udp[c]	1.61712e-05		LIPO2S24_MT	d12dg_MT[c] + 24 uacgam[c] + 24 cdpglyc[c] -> 24 cmp[c] + lipo2_24_MT[c] + 48 h[c] + 24 udp[c]	4.1733e-05		LIPO2S24_MT	d12dg_MT[c] + 24 uacgam[c] + 24 cdpglyc[c] -> 24 cmp[c] + lipo2_24_MT[c] + 48 h[c] + 24 udp[c]	1.00815e-05
LIPO3S24_MT	24 h2o[c] + 24 atp[c] + d12dg_MT[c] + 24 ala-D[c] + 24 cdpglyc[c] -> 24 amp[c] + 24 cmp[c] + lipo3_24_MT[c] + 24 ppi[c] + 48 h[c]	0.00020868		LIPO3S24_MT	24 h2o[c] + 24 atp[c] + d12dg_MT[c] + 24 ala-D[c] + 24 cdpglyc[c] -> 24 amp[c] + 24 cmp[c] + lipo3_24_MT[c] + 24 ppi[c] + 48 h[c]	0.000244217		LIPO3S24_MT	24 h2o[c] + 24 atp[c] + d12dg_MT[c] + 24 ala-D[c] + 24 cdpglyc[c] -> 24 amp[c] + 24 cmp[c] + lipo3_24_MT[c] + 24 ppi[c] + 48 h[c]	0.000145004		LIPO3S24_MT	24 h2o[c] + 24 atp[c] + d12dg_MT[c] + 24 ala-D[c] + 24 cdpglyc[c] -> 24 amp[c] + 24 cmp[c] + lipo3_24_MT[c] + 24 ppi[c] + 48 h[c]	4.85136e-05		LIPO3S24_MT	24 h2o[c] + 24 atp[c] + d12dg_MT[c] + 24 ala-D[c] + 24 cdpglyc[c] -> 24 amp[c] + 24 cmp[c] + lipo3_24_MT[c] + 24 ppi[c] + 48 h[c]	0.000125199		LIPO3S24_MT	24 h2o[c] + 24 atp[c] + d12dg_MT[c] + 24 ala-D[c] + 24 cdpglyc[c] -> 24 amp[c] + 24 cmp[c] + lipo3_24_MT[c] + 24 ppi[c] + 48 h[c]	3.02445e-05
LIPO4S24_MT	d12dg_MT[c] + 24 cdpglyc[c] -> cmp[c] + lipo4_24_MT[c] + h[c]	0.0001739		LIPO4S24_MT	d12dg_MT[c] + 24 cdpglyc[c] -> cmp[c] + lipo4_24_MT[c] + h[c]	0.000203514		LIPO4S24_MT	d12dg_MT[c] + 24 cdpglyc[c] -> cmp[c] + lipo4_24_MT[c] + h[c]	0.000120837		LIPO4S24_MT	d12dg_MT[c] + 24 cdpglyc[c] -> cmp[c] + lipo4_24_MT[c] + h[c]	4.0428e-05		LIPO4S24_MT	d12dg_MT[c] + 24 cdpglyc[c] -> cmp[c] + lipo4_24_MT[c] + h[c]	0.000104332		LIPO4S24_MT	d12dg_MT[c] + 24 cdpglyc[c] -> cmp[c] + lipo4_24_MT[c] + h[c]	2.52038e-05
LYSLG_MT	atp[c] + lys-L[c] + pgly_MT[c] -> amp[c] + lysylpgly_MT[c] + ppi[c] + h[c]	0.000255053		LYSLG_MT	atp[c] + lys-L[c] + pgly_MT[c] -> amp[c] + lysylpgly_MT[c] + ppi[c] + h[c]	0.000298488		LYSLG_MT	atp[c] + lys-L[c] + pgly_MT[c] -> amp[c] + lysylpgly_MT[c] + ppi[c] + h[c]	0.000177227		LYSLG_MT	atp[c] + lys-L[c] + pgly_MT[c] -> amp[c] + lysylpgly_MT[c] + ppi[c] + h[c]	5.92944e-05		LYSLG_MT	atp[c] + lys-L[c] + pgly_MT[c] -> amp[c] + lysylpgly_MT[c] + ppi[c] + h[c]	0.000153021		LYSLG_MT	atp[c] + lys-L[c] + pgly_MT[c] -> amp[c] + lysylpgly_MT[c] + ppi[c] + h[c]	3.69656e-05
NACCYT	ctp[c] + acnam[c] -> ppi[c] + cmpacna[c]	0		NACCYT	ctp[c] + acnam[c] -> ppi[c] + cmpacna[c]	0		NACCYT	ctp[c] + acnam[c] -> ppi[c] + cmpacna[c]	0		NACCYT	ctp[c] + acnam[c] -> ppi[c] + cmpacna[c]	0		NACCYT	ctp[c] + acnam[c] -> ppi[c] + cmpacna[c]	0		NACCYT	ctp[c] + acnam[c] -> ppi[c] + cmpacna[c]	0
PAP_MT	h2o[c] + 12dag3p_MT[c] -> pi[c] + 12dgr_MT[c]	0.00354755		PAP_MT	h2o[c] + 12dag3p_MT[c] -> pi[c] + 12dgr_MT[c]	0.00415169		PAP_MT	h2o[c] + 12dag3p_MT[c] -> pi[c] + 12dgr_MT[c]	0.00246507		PAP_MT	h2o[c] + 12dag3p_MT[c] -> pi[c] + 12dgr_MT[c]	0.000824731		PAP_MT	h2o[c] + 12dag3p_MT[c] -> pi[c] + 12dgr_MT[c]	0.00212838		PAP_MT	h2o[c] + 12dag3p_MT[c] -> pi[c] + 12dgr_MT[c]	0.000514157
PAPPT3	udcpp[c] + ugmda[c] <=> ump[c] + uagmda[c]	0.011802		PAPPT3	udcpp[c] + ugmda[c] <=> ump[c] + uagmda[c]	0.0138118		PAPPT3	udcpp[c] + ugmda[c] <=> ump[c] + uagmda[c]	0.0082008		PAPPT3	udcpp[c] + ugmda[c] <=> ump[c] + uagmda[c]	0.00274371		PAPPT3	udcpp[c] + ugmda[c] <=> ump[c] + uagmda[c]	0.0070807		PAPPT3	udcpp[c] + ugmda[c] <=> ump[c] + uagmda[c]	0.0017105
PGAMT	gam1p[c] <=> gam6p[c]	-0.0378406		PGAMT	gam1p[c] <=> gam6p[c]	-0.0442847		PGAMT	gam1p[c] <=> gam6p[c]	-0.0262941		PGAMT	gam1p[c] <=> gam6p[c]	-0.00879713		PGAMT	gam1p[c] <=> gam6p[c]	-0.0227027		PGAMT	gam1p[c] <=> gam6p[c]	-0.00548434
PGPPH_MT	h2o[c] + pglyp_MT[c] -> pgly_MT[c] + pi[c]	0.002423		PGPPH_MT	h2o[c] + pglyp_MT[c] -> pgly_MT[c] + pi[c]	0.00283563		PGPPH_MT	h2o[c] + pglyp_MT[c] -> pgly_MT[c] + pi[c]	0.00168366		PGPPH_MT	h2o[c] + pglyp_MT[c] -> pgly_MT[c] + pi[c]	0.000563297		PGPPH_MT	h2o[c] + pglyp_MT[c] -> pgly_MT[c] + pi[c]	0.0014537		PGPPH_MT	h2o[c] + pglyp_MT[c] -> pgly_MT[c] + pi[c]	0.000351173
PHCYT_MT	ctp[c] + h[c] + 12dag3p_MT[c] -> ppi[c] + cdpdag_MT[c]	0.00893844		PHCYT_MT	ctp[c] + h[c] + 12dag3p_MT[c] -> ppi[c] + cdpdag_MT[c]	0.0104606		PHCYT_MT	ctp[c] + h[c] + 12dag3p_MT[c] -> ppi[c] + cdpdag_MT[c]	0.00621102		PHCYT_MT	ctp[c] + h[c] + 12dag3p_MT[c] -> ppi[c] + cdpdag_MT[c]	0.002078		PHCYT_MT	ctp[c] + h[c] + 12dag3p_MT[c] -> ppi[c] + cdpdag_MT[c]	0.00536269		PHCYT_MT	ctp[c] + h[c] + 12dag3p_MT[c] -> ppi[c] + cdpdag_MT[c]	0.00129547
PPTGS_MT	uaagmda[c] -> peptido_MT[c] + h[c] + udcpdp[c]	0.011802		PPTGS_MT	uaagmda[c] -> peptido_MT[c] + h[c] + udcpdp[c]	0.0138118		PPTGS_MT	uaagmda[c] -> peptido_MT[c] + h[c] + udcpdp[c]	0.0082008		PPTGS_MT	uaagmda[c] -> peptido_MT[c] + h[c] + udcpdp[c]	0.00274371		PPTGS_MT	uaagmda[c] -> peptido_MT[c] + h[c] + udcpdp[c]	0.0070807		PPTGS_MT	uaagmda[c] -> peptido_MT[c] + h[c] + udcpdp[c]	0.0017105
PSDC_MT	ps_MT[c] -> psetha_MT[c] + co2[c]	0.00651544		PSDC_MT	ps_MT[c] -> psetha_MT[c] + co2[c]	0.00762501		PSDC_MT	ps_MT[c] -> psetha_MT[c] + co2[c]	0.00452735		PSDC_MT	ps_MT[c] -> psetha_MT[c] + co2[c]	0.0015147		PSDC_MT	ps_MT[c] -> psetha_MT[c] + co2[c]	0.00390899		PSDC_MT	ps_MT[c] -> psetha_MT[c] + co2[c]	0.000944302
TDPDRE	dtdp4d6dg[c] <=> dtdp4d6dm[c]	0		TDPDRE	dtdp4d6dg[c] <=> dtdp4d6dm[c]	0		TDPDRE	dtdp4d6dg[c] <=> dtdp4d6dm[c]	0		TDPDRE	dtdp4d6dg[c] <=> dtdp4d6dm[c]	0		TDPDRE	dtdp4d6dg[c] <=> dtdp4d6dm[c]	0		TDPDRE	dtdp4d6dg[c] <=> dtdp4d6dm[c]	0
TDPDRR	nadp[c] + dtdprmn[c] <=> nadph[c] + h[c] + dtdp4d6dm[c]	0		TDPDRR	nadp[c] + dtdprmn[c] <=> nadph[c] + h[c] + dtdp4d6dm[c]	0		TDPDRR	nadp[c] + dtdprmn[c] <=> nadph[c] + h[c] + dtdp4d6dm[c]	0		TDPDRR	nadp[c] + dtdprmn[c] <=> nadph[c] + h[c] + dtdp4d6dm[c]	0		TDPDRR	nadp[c] + dtdprmn[c] <=> nadph[c] + h[c] + dtdp4d6dm[c]	0		TDPDRR	nadp[c] + dtdprmn[c] <=> nadph[c] + h[c] + dtdp4d6dm[c]	0
TDPGDH	dtdpglu[c] -> h2o[c] + dtdp4d6dg[c]	0		TDPGDH	dtdpglu[c] -> h2o[c] + dtdp4d6dg[c]	0		TDPGDH	dtdpglu[c] -> h2o[c] + dtdp4d6dg[c]	0		TDPGDH	dtdpglu[c] -> h2o[c] + dtdp4d6dg[c]	0		TDPGDH	dtdpglu[c] -> h2o[c] + dtdp4d6dg[c]	0		TDPGDH	dtdpglu[c] -> h2o[c] + dtdp4d6dg[c]	0
TECA1S45	uacgam[c] + 45 cdpglyc[c] + uacmam[c] -> cmp[c] + gtca1_45_MT[c] + h[c] + udp[c] + ump[c]	0.000417359		TECA1S45	uacgam[c] + 45 cdpglyc[c] + uacmam[c] -> cmp[c] + gtca1_45_MT[c] + h[c] + udp[c] + ump[c]	0.000488435		TECA1S45	uacgam[c] + 45 cdpglyc[c] + uacmam[c] -> cmp[c] + gtca1_45_MT[c] + h[c] + udp[c] + ump[c]	0.000290008		TECA1S45	uacgam[c] + 45 cdpglyc[c] + uacmam[c] -> cmp[c] + gtca1_45_MT[c] + h[c] + udp[c] + ump[c]	9.70272e-05		TECA1S45	uacgam[c] + 45 cdpglyc[c] + uacmam[c] -> cmp[c] + gtca1_45_MT[c] + h[c] + udp[c] + ump[c]	0.000250398		TECA1S45	uacgam[c] + 45 cdpglyc[c] + uacmam[c] -> cmp[c] + gtca1_45_MT[c] + h[c] + udp[c] + ump[c]	6.04891e-05
TECA2S45	45 h2o[c] + 45 atp[c] + 45 ala-D[c] + uacgam[c] + 45 cdpglyc[c] + uacmam[c] -> amp[c] + cmp[c] + gtca2_45_MT[c] + ppi[c] + h[c] + udp[c] + ump[c]	0.000266646		TECA2S45	45 h2o[c] + 45 atp[c] + 45 ala-D[c] + uacgam[c] + 45 cdpglyc[c] + uacmam[c] -> amp[c] + cmp[c] + gtca2_45_MT[c] + ppi[c] + h[c] + udp[c] + ump[c]	0.000312055		TECA2S45	45 h2o[c] + 45 atp[c] + 45 ala-D[c] + uacgam[c] + 45 cdpglyc[c] + uacmam[c] -> amp[c] + cmp[c] + gtca2_45_MT[c] + ppi[c] + h[c] + udp[c] + ump[c]	0.000185283		TECA2S45	45 h2o[c] + 45 atp[c] + 45 ala-D[c] + uacgam[c] + 45 cdpglyc[c] + uacmam[c] -> amp[c] + cmp[c] + gtca2_45_MT[c] + ppi[c] + h[c] + udp[c] + ump[c]	6.19896e-05		TECA2S45	45 h2o[c] + 45 atp[c] + 45 ala-D[c] + uacgam[c] + 45 cdpglyc[c] + uacmam[c] -> amp[c] + cmp[c] + gtca2_45_MT[c] + ppi[c] + h[c] + udp[c] + ump[c]	0.000159976		TECA2S45	45 h2o[c] + 45 atp[c] + 45 ala-D[c] + uacgam[c] + 45 cdpglyc[c] + uacmam[c] -> amp[c] + cmp[c] + gtca2_45_MT[c] + ppi[c] + h[c] + udp[c] + ump[c]	3.86458e-05
TECA3S45	h2o[c] + 45 udpg[c] + uacgam[c] + 45 cdpglyc[c] + uacmam[c] -> cmp[c] + gtca3_45_MT[c] + h[c] + udp[c] + ump[c]	0.00020868		TECA3S45	h2o[c] + 45 udpg[c] + uacgam[c] + 45 cdpglyc[c] + uacmam[c] -> cmp[c] + gtca3_45_MT[c] + h[c] + udp[c] + ump[c]	0.000244217		TECA3S45	h2o[c] + 45 udpg[c] + uacgam[c] + 45 cdpglyc[c] + uacmam[c] -> cmp[c] + gtca3_45_MT[c] + h[c] + udp[c] + ump[c]	0.000145004		TECA3S45	h2o[c] + 45 udpg[c] + uacgam[c] + 45 cdpglyc[c] + uacmam[c] -> cmp[c] + gtca3_45_MT[c] + h[c] + udp[c] + ump[c]	4.85136e-05		TECA3S45	h2o[c] + 45 udpg[c] + uacgam[c] + 45 cdpglyc[c] + uacmam[c] -> cmp[c] + gtca3_45_MT[c] + h[c] + udp[c] + ump[c]	0.000125199		TECA3S45	h2o[c] + 45 udpg[c] + uacgam[c] + 45 cdpglyc[c] + uacmam[c] -> cmp[c] + gtca3_45_MT[c] + h[c] + udp[c] + ump[c]	3.02445e-05
TECA4S_MT	30 h2o[c] + 30 udpg[c] + 30 udpacgal[c] -> tcam_MT[c] + 60 h[c] + 30 udp[c] + 30 ump[c]	0.000359393		TECA4S_MT	30 h2o[c] + 30 udpg[c] + 30 udpacgal[c] -> tcam_MT[c] + 60 h[c] + 30 udp[c] + 30 ump[c]	0.000420596		TECA4S_MT	30 h2o[c] + 30 udpg[c] + 30 udpacgal[c] -> tcam_MT[c] + 60 h[c] + 30 udp[c] + 30 ump[c]	0.00024973		TECA4S_MT	30 h2o[c] + 30 udpg[c] + 30 udpacgal[c] -> tcam_MT[c] + 60 h[c] + 30 udp[c] + 30 ump[c]	8.35512e-05		TECA4S_MT	30 h2o[c] + 30 udpg[c] + 30 udpacgal[c] -> tcam_MT[c] + 60 h[c] + 30 udp[c] + 30 ump[c]	0.00021562		TECA4S_MT	30 h2o[c] + 30 udpg[c] + 30 udpacgal[c] -> tcam_MT[c] + 60 h[c] + 30 udp[c] + 30 ump[c]	5.20878e-05
TEICH45	45 udpacgal[c] + 45 udpglcur[c] <=> 45 h[c] + 45 udp[c] + 45 ump[c] + teich_45_MT[c]	0		TEICH45	45 udpacgal[c] + 45 udpglcur[c] <=> 45 h[c] + 45 udp[c] + 45 ump[c] + teich_45_MT[c]	0		TEICH45	45 udpacgal[c] + 45 udpglcur[c] <=> 45 h[c] + 45 udp[c] + 45 ump[c] + teich_45_MT[c]	0		TEICH45	45 udpacgal[c] + 45 udpglcur[c] <=> 45 h[c] + 45 udp[c] + 45 ump[c] + teich_45_MT[c]	0		TEICH45	45 udpacgal[c] + 45 udpglcur[c] <=> 45 h[c] + 45 udp[c] + 45 ump[c] + teich_45_MT[c]	0		TEICH45	45 udpacgal[c] + 45 udpglcur[c] <=> 45 h[c] + 45 udp[c] + 45 ump[c] + teich_45_MT[c]	0
UAAGDS	atp[c] + 26dap-M[c] + uamag[c] -> pi[c] + h[c] + adp[c] + ugmd[c]	0.011802		UAAGDS	atp[c] + 26dap-M[c] + uamag[c] -> pi[c] + h[c] + adp[c] + ugmd[c]	0.0138118		UAAGDS	atp[c] + 26dap-M[c] + uamag[c] -> pi[c] + h[c] + adp[c] + ugmd[c]	0.0082008		UAAGDS	atp[c] + 26dap-M[c] + uamag[c] -> pi[c] + h[c] + adp[c] + ugmd[c]	0.00274371		UAAGDS	atp[c] + 26dap-M[c] + uamag[c] -> pi[c] + h[c] + adp[c] + ugmd[c]	0.0070807		UAAGDS	atp[c] + 26dap-M[c] + uamag[c] -> pi[c] + h[c] + adp[c] + ugmd[c]	0.0017105
UAG2E	uacgam[c] <=> uacmam[c]	0.000892685		UAG2E	uacgam[c] <=> uacmam[c]	0.00104471		UAG2E	uacgam[c] <=> uacmam[c]	0.000620296		UAG2E	uacgam[c] <=> uacmam[c]	0.00020753		UAG2E	uacgam[c] <=> uacmam[c]	0.000535573		UAG2E	uacgam[c] <=> uacmam[c]	0.000129379
UAG4E	uacgam[c] <=> udpacgal[c]	0.0107818		UAG4E	uacgam[c] <=> udpacgal[c]	0.0126179		UAG4E	uacgam[c] <=> udpacgal[c]	0.00749189		UAG4E	uacgam[c] <=> udpacgal[c]	0.00250654		UAG4E	uacgam[c] <=> udpacgal[c]	0.00646861		UAG4E	uacgam[c] <=> udpacgal[c]	0.00156264
UAGCVT	pep[c] + uacgam[c] <=> pi[c] + h[c] + uaccg[c]	0.011802		UAGCVT	pep[c] + uacgam[c] <=> pi[c] + h[c] + uaccg[c]	0.0138118		UAGCVT	pep[c] + uacgam[c] <=> pi[c] + h[c] + uaccg[c]	0.0082008		UAGCVT	pep[c] + uacgam[c] <=> pi[c] + h[c] + uaccg[c]	0.00274371		UAGCVT	pep[c] + uacgam[c] <=> pi[c] + h[c] + uaccg[c]	0.0070807		UAGCVT	pep[c] + uacgam[c] <=> pi[c] + h[c] + uaccg[c]	0.0017105
UAGDP	utp[c] + acgam1p[c] <=> ppi[c] + uacgam[c]	0.0378406		UAGDP	utp[c] + acgam1p[c] <=> ppi[c] + uacgam[c]	0.0442847		UAGDP	utp[c] + acgam1p[c] <=> ppi[c] + uacgam[c]	0.0262941		UAGDP	utp[c] + acgam1p[c] <=> ppi[c] + uacgam[c]	0.00879713		UAGDP	utp[c] + acgam1p[c] <=> ppi[c] + uacgam[c]	0.0227027		UAGDP	utp[c] + acgam1p[c] <=> ppi[c] + uacgam[c]	0.00548434
UAGPT3	uacgam[c] + uagmda[c] <=> udp[c] + uaagmda[c]	0.011802		UAGPT3	uacgam[c] + uagmda[c] <=> udp[c] + uaagmda[c]	0.0138118		UAGPT3	uacgam[c] + uagmda[c] <=> udp[c] + uaagmda[c]	0.0082008		UAGPT3	uacgam[c] + uagmda[c] <=> udp[c] + uaagmda[c]	0.00274371		UAGPT3	uacgam[c] + uagmda[c] <=> udp[c] + uaagmda[c]	0.0070807		UAGPT3	uacgam[c] + uagmda[c] <=> udp[c] + uaagmda[c]	0.0017105
UAMAGS	atp[c] + glu-D[c] + uama[c] -> pi[c] + h[c] + adp[c] + uamag[c]	0.011802		UAMAGS	atp[c] + glu-D[c] + uama[c] -> pi[c] + h[c] + adp[c] + uamag[c]	0.0138118		UAMAGS	atp[c] + glu-D[c] + uama[c] -> pi[c] + h[c] + adp[c] + uamag[c]	0.0082008		UAMAGS	atp[c] + glu-D[c] + uama[c] -> pi[c] + h[c] + adp[c] + uamag[c]	0.00274371		UAMAGS	atp[c] + glu-D[c] + uama[c] -> pi[c] + h[c] + adp[c] + uamag[c]	0.0070807		UAMAGS	atp[c] + glu-D[c] + uama[c] -> pi[c] + h[c] + adp[c] + uamag[c]	0.0017105
UAMAS	atp[c] + ala-L[c] + uamr[c] -> pi[c] + h[c] + adp[c] + uama[c]	0.011802		UAMAS	atp[c] + ala-L[c] + uamr[c] -> pi[c] + h[c] + adp[c] + uama[c]	0.0138118		UAMAS	atp[c] + ala-L[c] + uamr[c] -> pi[c] + h[c] + adp[c] + uama[c]	0.0082008		UAMAS	atp[c] + ala-L[c] + uamr[c] -> pi[c] + h[c] + adp[c] + uama[c]	0.00274371		UAMAS	atp[c] + ala-L[c] + uamr[c] -> pi[c] + h[c] + adp[c] + uama[c]	0.0070807		UAMAS	atp[c] + ala-L[c] + uamr[c] -> pi[c] + h[c] + adp[c] + uama[c]	0.0017105
UAPGR	nadph[c] + h[c] + uaccg[c] -> nadp[c] + uamr[c]	0.011802		UAPGR	nadph[c] + h[c] + uaccg[c] -> nadp[c] + uamr[c]	0.0138118		UAPGR	nadph[c] + h[c] + uaccg[c] -> nadp[c] + uamr[c]	0.0082008		UAPGR	nadph[c] + h[c] + uaccg[c] -> nadp[c] + uamr[c]	0.00274371		UAPGR	nadph[c] + h[c] + uaccg[c] -> nadp[c] + uamr[c]	0.0070807		UAPGR	nadph[c] + h[c] + uaccg[c] -> nadp[c] + uamr[c]	0.0017105
UDCPDP	h2o[c] + udcpdp[c] -> pi[c] + h[c] + udcpp[c]	0.011802		UDCPDP	h2o[c] + udcpdp[c] -> pi[c] + h[c] + udcpp[c]	0.0138118		UDCPDP	h2o[c] + udcpdp[c] -> pi[c] + h[c] + udcpp[c]	0.0082008		UDCPDP	h2o[c] + udcpdp[c] -> pi[c] + h[c] + udcpp[c]	0.00274371		UDCPDP	h2o[c] + udcpdp[c] -> pi[c] + h[c] + udcpp[c]	0.0070807		UDCPDP	h2o[c] + udcpdp[c] -> pi[c] + h[c] + udcpp[c]	0.0017105
UDCPDPS	frdp[c] + 8 ipdp[c] -> 8 ppi[c] + udcpdp[c]	0		UDCPDPS	frdp[c] + 8 ipdp[c] -> 8 ppi[c] + udcpdp[c]	0		UDCPDPS	frdp[c] + 8 ipdp[c] -> 8 ppi[c] + udcpdp[c]	0		UDCPDPS	frdp[c] + 8 ipdp[c] -> 8 ppi[c] + udcpdp[c]	0		UDCPDPS	frdp[c] + 8 ipdp[c] -> 8 ppi[c] + udcpdp[c]	0		UDCPDPS	frdp[c] + 8 ipdp[c] -> 8 ppi[c] + udcpdp[c]	0
UGMDDS	atp[c] + alaala[c] + ugmd[c] -> pi[c] + h[c] + adp[c] + ugmda[c]	0.011802		UGMDDS	atp[c] + alaala[c] + ugmd[c] -> pi[c] + h[c] + adp[c] + ugmda[c]	0.0138118		UGMDDS	atp[c] + alaala[c] + ugmd[c] -> pi[c] + h[c] + adp[c] + ugmda[c]	0.0082008		UGMDDS	atp[c] + alaala[c] + ugmd[c] -> pi[c] + h[c] + adp[c] + ugmda[c]	0.00274371		UGMDDS	atp[c] + alaala[c] + ugmd[c] -> pi[c] + h[c] + adp[c] + ugmda[c]	0.0070807		UGMDDS	atp[c] + alaala[c] + ugmd[c] -> pi[c] + h[c] + adp[c] + ugmda[c]	0.0017105
UGT_MT	2 udpg[c] + 12dgr_MT[c] -> d12dg_MT[c] + 2 h[c] + 2 udp[c]	0.00180856		UGT_MT	2 udpg[c] + 12dgr_MT[c] -> d12dg_MT[c] + 2 h[c] + 2 udp[c]	0.00211655		UGT_MT	2 udpg[c] + 12dgr_MT[c] -> d12dg_MT[c] + 2 h[c] + 2 udp[c]	0.0012567		UGT_MT	2 udpg[c] + 12dgr_MT[c] -> d12dg_MT[c] + 2 h[c] + 2 udp[c]	0.000420451		UGT_MT	2 udpg[c] + 12dgr_MT[c] -> d12dg_MT[c] + 2 h[c] + 2 udp[c]	0.00108506		UGT_MT	2 udpg[c] + 12dgr_MT[c] -> d12dg_MT[c] + 2 h[c] + 2 udp[c]	0.000262119
UGT1_MT	udpg[c] + 12dgr_MT[c] -> m12dg_MT[c] + h[c] + udp[c]	0.000973838		UGT1_MT	udpg[c] + 12dgr_MT[c] -> m12dg_MT[c] + h[c] + udp[c]	0.00113968		UGT1_MT	udpg[c] + 12dgr_MT[c] -> m12dg_MT[c] + h[c] + udp[c]	0.000676686		UGT1_MT	udpg[c] + 12dgr_MT[c] -> m12dg_MT[c] + h[c] + udp[c]	0.000226397		UGT1_MT	udpg[c] + 12dgr_MT[c] -> m12dg_MT[c] + h[c] + udp[c]	0.000584262		UGT1_MT	udpg[c] + 12dgr_MT[c] -> m12dg_MT[c] + h[c] + udp[c]	0.000141141
UGT2_MT	3 udpg[c] + 12dgr_MT[c] -> t12dg_MT[c] + 3 h[c] + 3 udp[c]	0.000765159		UGT2_MT	3 udpg[c] + 12dgr_MT[c] -> t12dg_MT[c] + 3 h[c] + 3 udp[c]	0.000895463		UGT2_MT	3 udpg[c] + 12dgr_MT[c] -> t12dg_MT[c] + 3 h[c] + 3 udp[c]	0.000531682		UGT2_MT	3 udpg[c] + 12dgr_MT[c] -> t12dg_MT[c] + 3 h[c] + 3 udp[c]	0.000177883		UGT2_MT	3 udpg[c] + 12dgr_MT[c] -> t12dg_MT[c] + 3 h[c] + 3 udp[c]	0.000459063		UGT2_MT	3 udpg[c] + 12dgr_MT[c] -> t12dg_MT[c] + 3 h[c] + 3 udp[c]	0.000110897
AHMMPS	h2o[c] + amet[c] + air[c] <=> met-L[c] + co[c] + 4ampm[c] + 5doxa[c] + for[c]	0		AHMMPS	h2o[c] + amet[c] + air[c] <=> met-L[c] + co[c] + 4ampm[c] + 5doxa[c] + for[c]	0		AHMMPS	h2o[c] + amet[c] + air[c] <=> met-L[c] + co[c] + 4ampm[c] + 5doxa[c] + for[c]	0		AHMMPS	h2o[c] + amet[c] + air[c] <=> met-L[c] + co[c] + 4ampm[c] + 5doxa[c] + for[c]	0		AHMMPS	h2o[c] + amet[c] + air[c] <=> met-L[c] + co[c] + 4ampm[c] + 5doxa[c] + for[c]	0		AHMMPS	h2o[c] + amet[c] + air[c] <=> met-L[c] + co[c] + 4ampm[c] + 5doxa[c] + for[c]	0
AKP1	3 h2o[c] + ahdt[c] -> 3 pi[c] + 2 h[c] + dhnpt[c]	0.000347799		AKP1	3 h2o[c] + ahdt[c] -> 3 pi[c] + 2 h[c] + dhnpt[c]	0.000407029		AKP1	3 h2o[c] + ahdt[c] -> 3 pi[c] + 2 h[c] + dhnpt[c]	0.000241674		AKP1	3 h2o[c] + ahdt[c] -> 3 pi[c] + 2 h[c] + dhnpt[c]	8.0856e-05		AKP1	3 h2o[c] + ahdt[c] -> 3 pi[c] + 2 h[c] + dhnpt[c]	0.000208665		AKP1	3 h2o[c] + ahdt[c] -> 3 pi[c] + 2 h[c] + dhnpt[c]	5.04076e-05
APRAUR	nadp[c] + 5aprbu[c] <=> nadph[c] + h[c] + 5apru[c]	-0.000231866		APRAUR	nadp[c] + 5aprbu[c] <=> nadph[c] + h[c] + 5apru[c]	-0.000271353		APRAUR	nadp[c] + 5aprbu[c] <=> nadph[c] + h[c] + 5apru[c]	-0.000161116		APRAUR	nadp[c] + 5aprbu[c] <=> nadph[c] + h[c] + 5apru[c]	-5.3904e-05		APRAUR	nadp[c] + 5aprbu[c] <=> nadph[c] + h[c] + 5apru[c]	-0.00013911		APRAUR	nadp[c] + 5aprbu[c] <=> nadph[c] + h[c] + 5apru[c]	-3.36051e-05
ASP1DC	asp-L[c] + h[c] -> co2[c] + ala-B[c]	0.000628875		ASP1DC	asp-L[c] + h[c] -> co2[c] + ala-B[c]	0.00073597		ASP1DC	asp-L[c] + h[c] -> co2[c] + ala-B[c]	0.000436983		ASP1DC	asp-L[c] + h[c] -> co2[c] + ala-B[c]	0.0001462		ASP1DC	asp-L[c] + h[c] -> co2[c] + ala-B[c]	0.000377298		ASP1DC	asp-L[c] + h[c] -> co2[c] + ala-B[c]	9.11446e-05
BTS	2 amet[c] + dtbt[c] + s[c] -> 2 met-L[c] + 2 5doxa[c] + btn[c]	0		BTS	2 amet[c] + dtbt[c] + s[c] -> 2 met-L[c] + 2 5doxa[c] + btn[c]	0		BTS	2 amet[c] + dtbt[c] + s[c] -> 2 met-L[c] + 2 5doxa[c] + btn[c]	0		BTS	2 amet[c] + dtbt[c] + s[c] -> 2 met-L[c] + 2 5doxa[c] + btn[c]	0		BTS	2 amet[c] + dtbt[c] + s[c] -> 2 met-L[c] + 2 5doxa[c] + btn[c]	0		BTS	2 amet[c] + dtbt[c] + s[c] -> 2 met-L[c] + 2 5doxa[c] + btn[c]	0
BACCL	atp[c] + h[c] + btn[c] -> ppi[c] + btamp[c]	0		BACCL	atp[c] + h[c] + btn[c] -> ppi[c] + btamp[c]	0		BACCL	atp[c] + h[c] + btn[c] -> ppi[c] + btamp[c]	0		BACCL	atp[c] + h[c] + btn[c] -> ppi[c] + btamp[c]	0		BACCL	atp[c] + h[c] + btn[c] -> ppi[c] + btamp[c]	0		BACCL	atp[c] + h[c] + btn[c] -> ppi[c] + btamp[c]	0
CDPMEK	atp[c] + 4c2me[c] <=> adp[c] + 2p4c2me[c]	0.000649226		CDPMEK	atp[c] + 4c2me[c] <=> adp[c] + 2p4c2me[c]	0.000759787		CDPMEK	atp[c] + 4c2me[c] <=> adp[c] + 2p4c2me[c]	0.000451124		CDPMEK	atp[c] + 4c2me[c] <=> adp[c] + 2p4c2me[c]	0.000150931		CDPMEK	atp[c] + 4c2me[c] <=> adp[c] + 2p4c2me[c]	0.000389508		CDPMEK	atp[c] + 4c2me[c] <=> adp[c] + 2p4c2me[c]	9.40942e-05
DB4PS	ru5p-D[c] -> h[c] + for[c] + db4p[c]	0.000463733		DB4PS	ru5p-D[c] -> h[c] + for[c] + db4p[c]	0.000542705		DB4PS	ru5p-D[c] -> h[c] + for[c] + db4p[c]	0.000322232		DB4PS	ru5p-D[c] -> h[c] + for[c] + db4p[c]	0.000107808		DB4PS	ru5p-D[c] -> h[c] + for[c] + db4p[c]	0.00027822		DB4PS	ru5p-D[c] -> h[c] + for[c] + db4p[c]	6.72101e-05
DHFR	nadp[c] + thf[c] <=> nadph[c] + h[c] + dhf[c]	-0.00265487		DHFR	nadp[c] + thf[c] <=> nadph[c] + h[c] + dhf[c]	-0.00310699		DHFR	nadp[c] + thf[c] <=> nadph[c] + h[c] + dhf[c]	-0.00184478		DHFR	nadp[c] + thf[c] <=> nadph[c] + h[c] + dhf[c]	-0.000617201		DHFR	nadp[c] + thf[c] <=> nadph[c] + h[c] + dhf[c]	-0.00159281		DHFR	nadp[c] + thf[c] <=> nadph[c] + h[c] + dhf[c]	-0.000384778
DHFS	atp[c] + glu-L[c] + dhpt[c] -> pi[c] + h[c] + adp[c] + dhf[c]	0.000347799		DHFS	atp[c] + glu-L[c] + dhpt[c] -> pi[c] + h[c] + adp[c] + dhf[c]	0.000407029		DHFS	atp[c] + glu-L[c] + dhpt[c] -> pi[c] + h[c] + adp[c] + dhf[c]	0.000241674		DHFS	atp[c] + glu-L[c] + dhpt[c] -> pi[c] + h[c] + adp[c] + dhf[c]	8.0856e-05		DHFS	atp[c] + glu-L[c] + dhpt[c] -> pi[c] + h[c] + adp[c] + dhf[c]	0.000208665		DHFS	atp[c] + glu-L[c] + dhpt[c] -> pi[c] + h[c] + adp[c] + dhf[c]	5.04076e-05
DHNPA3	dhnpt[c] -> 2ahhmp[c] + gcald[c]	0.000347799		DHNPA3	dhnpt[c] -> 2ahhmp[c] + gcald[c]	0.000407029		DHNPA3	dhnpt[c] -> 2ahhmp[c] + gcald[c]	0.000241674		DHNPA3	dhnpt[c] -> 2ahhmp[c] + gcald[c]	8.0856e-05		DHNPA3	dhnpt[c] -> 2ahhmp[c] + gcald[c]	0.000208665		DHNPA3	dhnpt[c] -> 2ahhmp[c] + gcald[c]	5.04076e-05
DHPPDA2	h2o[c] + h[c] + 25drapp[c] -> nh4[c] + 5apru[c]	0.000231866		DHPPDA2	h2o[c] + h[c] + 25drapp[c] -> nh4[c] + 5apru[c]	0.000271353		DHPPDA2	h2o[c] + h[c] + 25drapp[c] -> nh4[c] + 5apru[c]	0.000161116		DHPPDA2	h2o[c] + h[c] + 25drapp[c] -> nh4[c] + 5apru[c]	5.3904e-05		DHPPDA2	h2o[c] + h[c] + 25drapp[c] -> nh4[c] + 5apru[c]	0.00013911		DHPPDA2	h2o[c] + h[c] + 25drapp[c] -> nh4[c] + 5apru[c]	3.36051e-05
DHPS	2ahhmd[c] + 4abz[c] -> ppi[c] + dhpt[c]	0.000347799		DHPS	2ahhmd[c] + 4abz[c] -> ppi[c] + dhpt[c]	0.000407029		DHPS	2ahhmd[c] + 4abz[c] -> ppi[c] + dhpt[c]	0.000241674		DHPS	2ahhmd[c] + 4abz[c] -> ppi[c] + dhpt[c]	8.0856e-05		DHPS	2ahhmd[c] + 4abz[c] -> ppi[c] + dhpt[c]	0.000208665		DHPS	2ahhmd[c] + 4abz[c] -> ppi[c] + dhpt[c]	5.04076e-05
HPPK	atp[c] + 2ahhmp[c] -> amp[c] + h[c] + 2ahhmd[c]	0.000347799		HPPK	atp[c] + 2ahhmp[c] -> amp[c] + h[c] + 2ahhmd[c]	0.000407029		HPPK	atp[c] + 2ahhmp[c] -> amp[c] + h[c] + 2ahhmd[c]	0.000241674		HPPK	atp[c] + 2ahhmp[c] -> amp[c] + h[c] + 2ahhmd[c]	8.0856e-05		HPPK	atp[c] + 2ahhmp[c] -> amp[c] + h[c] + 2ahhmd[c]	0.000208665		HPPK	atp[c] + 2ahhmp[c] -> amp[c] + h[c] + 2ahhmd[c]	5.04076e-05
DMPPS	h[c] + nadh[c] + h2mb4p[c] -> h2o[c] + nad[c] + dmpp[c]	0		DMPPS	h[c] + nadh[c] + h2mb4p[c] -> h2o[c] + nad[c] + dmpp[c]	0		DMPPS	h[c] + nadh[c] + h2mb4p[c] -> h2o[c] + nad[c] + dmpp[c]	0.000451124		DMPPS	h[c] + nadh[c] + h2mb4p[c] -> h2o[c] + nad[c] + dmpp[c]	0		DMPPS	h[c] + nadh[c] + h2mb4p[c] -> h2o[c] + nad[c] + dmpp[c]	0		DMPPS	h[c] + nadh[c] + h2mb4p[c] -> h2o[c] + nad[c] + dmpp[c]	9.40942e-05
DPCOAK	atp[c] + dpcoa[c] -> coa[c] + adp[c]	0.000628875		DPCOAK	atp[c] + dpcoa[c] -> coa[c] + adp[c]	0.00073597		DPCOAK	atp[c] + dpcoa[c] -> coa[c] + adp[c]	0.000436983		DPCOAK	atp[c] + dpcoa[c] -> coa[c] + adp[c]	0.0001462		DPCOAK	atp[c] + dpcoa[c] -> coa[c] + adp[c]	0.000377298		DPCOAK	atp[c] + dpcoa[c] -> coa[c] + adp[c]	9.11446e-05
DPR	nadp[c] + pant-R[c] <=> nadph[c] + h[c] + 2dhp[c]	-0.000628875		DPR	nadp[c] + pant-R[c] <=> nadph[c] + h[c] + 2dhp[c]	-0.00073597		DPR	nadp[c] + pant-R[c] <=> nadph[c] + h[c] + 2dhp[c]	-0.000436983		DPR	nadp[c] + pant-R[c] <=> nadph[c] + h[c] + 2dhp[c]	-0.0001462		DPR	nadp[c] + pant-R[c] <=> nadph[c] + h[c] + 2dhp[c]	-0.000377298		DPR	nadp[c] + pant-R[c] <=> nadph[c] + h[c] + 2dhp[c]	-9.11446e-05
DXPRI	nadp[c] + 2me4p[c] <=> nadph[c] + h[c] + dxyl5p[c]	-0.000649226		DXPRI	nadp[c] + 2me4p[c] <=> nadph[c] + h[c] + dxyl5p[c]	-0.000759787		DXPRI	nadp[c] + 2me4p[c] <=> nadph[c] + h[c] + dxyl5p[c]	-0.000451124		DXPRI	nadp[c] + 2me4p[c] <=> nadph[c] + h[c] + dxyl5p[c]	-0.000150931		DXPRI	nadp[c] + 2me4p[c] <=> nadph[c] + h[c] + dxyl5p[c]	-0.000389508		DXPRI	nadp[c] + 2me4p[c] <=> nadph[c] + h[c] + dxyl5p[c]	-9.40942e-05
DXPS	h[c] + pyr[c] + g3p[c] -> co2[c] + dxyl5p[c]	0.000649226		DXPS	h[c] + pyr[c] + g3p[c] -> co2[c] + dxyl5p[c]	0.000759787		DXPS	h[c] + pyr[c] + g3p[c] -> co2[c] + dxyl5p[c]	0.000451124		DXPS	h[c] + pyr[c] + g3p[c] -> co2[c] + dxyl5p[c]	0.000150931		DXPS	h[c] + pyr[c] + g3p[c] -> co2[c] + dxyl5p[c]	0.000389508		DXPS	h[c] + pyr[c] + g3p[c] -> co2[c] + dxyl5p[c]	9.40942e-05
FMNAT	atp[c] + fmn[c] -> ppi[c] + fad[c]	0		FMNAT	atp[c] + fmn[c] -> ppi[c] + fad[c]	0		FMNAT	atp[c] + fmn[c] -> ppi[c] + fad[c]	0		FMNAT	atp[c] + fmn[c] -> ppi[c] + fad[c]	0		FMNAT	atp[c] + fmn[c] -> ppi[c] + fad[c]	0		FMNAT	atp[c] + fmn[c] -> ppi[c] + fad[c]	0
FOLR2	nadp[c] + dhf[c] <=> nadph[c] + fol[c]	0		FOLR2	nadp[c] + dhf[c] <=> nadph[c] + fol[c]	0		FOLR2	nadp[c] + dhf[c] <=> nadph[c] + fol[c]	0		FOLR2	nadp[c] + dhf[c] <=> nadph[c] + fol[c]	0		FOLR2	nadp[c] + dhf[c] <=> nadph[c] + fol[c]	0		FOLR2	nadp[c] + dhf[c] <=> nadph[c] + fol[c]	0
FTHFCL	atp[c] + 5fthf[c] -> pi[c] + adp[c] + methf[c]	0		FTHFCL	atp[c] + 5fthf[c] -> pi[c] + adp[c] + methf[c]	0		FTHFCL	atp[c] + 5fthf[c] -> pi[c] + adp[c] + methf[c]	0		FTHFCL	atp[c] + 5fthf[c] -> pi[c] + adp[c] + methf[c]	0		FTHFCL	atp[c] + 5fthf[c] -> pi[c] + adp[c] + methf[c]	0		FTHFCL	atp[c] + 5fthf[c] -> pi[c] + adp[c] + methf[c]	0
GTPCI	h2o[c] + gtp[c] -> h[c] + for[c] + ahdt[c]	0.000347799		GTPCI	h2o[c] + gtp[c] -> h[c] + for[c] + ahdt[c]	0.000407029		GTPCI	h2o[c] + gtp[c] -> h[c] + for[c] + ahdt[c]	0.000241674		GTPCI	h2o[c] + gtp[c] -> h[c] + for[c] + ahdt[c]	8.0856e-05		GTPCI	h2o[c] + gtp[c] -> h[c] + for[c] + ahdt[c]	0.000208665		GTPCI	h2o[c] + gtp[c] -> h[c] + for[c] + ahdt[c]	5.04076e-05
GTPCII	3 h2o[c] + gtp[c] -> ppi[c] + h[c] + for[c] + 25drapp[c]	0.000231866		GTPCII	3 h2o[c] + gtp[c] -> ppi[c] + h[c] + for[c] + 25drapp[c]	0.000271353		GTPCII	3 h2o[c] + gtp[c] -> ppi[c] + h[c] + for[c] + 25drapp[c]	0.000161116		GTPCII	3 h2o[c] + gtp[c] -> ppi[c] + h[c] + for[c] + 25drapp[c]	5.3904e-05		GTPCII	3 h2o[c] + gtp[c] -> ppi[c] + h[c] + for[c] + 25drapp[c]	0.00013911		GTPCII	3 h2o[c] + gtp[c] -> ppi[c] + h[c] + for[c] + 25drapp[c]	3.36051e-05
HBZOPT	octdp[c] + 4hbz[c] -> ppi[c] + 3ophb[c]	0		HBZOPT	octdp[c] + 4hbz[c] -> ppi[c] + 3ophb[c]	0		HBZOPT	octdp[c] + 4hbz[c] -> ppi[c] + 3ophb[c]	0		HBZOPT	octdp[c] + 4hbz[c] -> ppi[c] + 3ophb[c]	0		HBZOPT	octdp[c] + 4hbz[c] -> ppi[c] + 3ophb[c]	0		HBZOPT	octdp[c] + 4hbz[c] -> ppi[c] + 3ophb[c]	0
HETZK	atp[c] + 4mhetz[c] <=> adp[c] + 4mpetz[c]	0		HETZK	atp[c] + 4mhetz[c] <=> adp[c] + 4mpetz[c]	0		HETZK	atp[c] + 4mhetz[c] <=> adp[c] + 4mpetz[c]	0		HETZK	atp[c] + 4mhetz[c] <=> adp[c] + 4mpetz[c]	0		HETZK	atp[c] + 4mhetz[c] <=> adp[c] + 4mpetz[c]	0		HETZK	atp[c] + 4mhetz[c] <=> adp[c] + 4mpetz[c]	0
HMPK1	atp[c] + 4ahmmp[c] <=> adp[c] + 4ampm[c]	0		HMPK1	atp[c] + 4ahmmp[c] <=> adp[c] + 4ampm[c]	0		HMPK1	atp[c] + 4ahmmp[c] <=> adp[c] + 4ampm[c]	0		HMPK1	atp[c] + 4ahmmp[c] <=> adp[c] + 4ampm[c]	0		HMPK1	atp[c] + 4ahmmp[c] <=> adp[c] + 4ampm[c]	0		HMPK1	atp[c] + 4ahmmp[c] <=> adp[c] + 4ampm[c]	0
IPDDIi	ipdp[c] <=> dmpp[c]	9.27465e-05		IPDDIi	ipdp[c] <=> dmpp[c]	0.000108541		IPDDIi	ipdp[c] <=> dmpp[c]	-0.000386678		IPDDIi	ipdp[c] <=> dmpp[c]	2.15616e-05		IPDDIi	ipdp[c] <=> dmpp[c]	5.5644e-05		IPDDIi	ipdp[c] <=> dmpp[c]	-8.06521e-05
IPDPS	h[c] + nadh[c] + h2mb4p[c] -> h2o[c] + nad[c] + ipdp[c]	0.000649226		IPDPS	h[c] + nadh[c] + h2mb4p[c] -> h2o[c] + nad[c] + ipdp[c]	0.000759787		IPDPS	h[c] + nadh[c] + h2mb4p[c] -> h2o[c] + nad[c] + ipdp[c]	0		IPDPS	h[c] + nadh[c] + h2mb4p[c] -> h2o[c] + nad[c] + ipdp[c]	0.000150931		IPDPS	h[c] + nadh[c] + h2mb4p[c] -> h2o[c] + nad[c] + ipdp[c]	0.000389508		IPDPS	h[c] + nadh[c] + h2mb4p[c] -> h2o[c] + nad[c] + ipdp[c]	0
MAN1PT1	gtp[c] + man1p[c] <=> ppi[c] + gdpmann[c]	0		MAN1PT1	gtp[c] + man1p[c] <=> ppi[c] + gdpmann[c]	0		MAN1PT1	gtp[c] + man1p[c] <=> ppi[c] + gdpmann[c]	0		MAN1PT1	gtp[c] + man1p[c] <=> ppi[c] + gdpmann[c]	0		MAN1PT1	gtp[c] + man1p[c] <=> ppi[c] + gdpmann[c]	0		MAN1PT1	gtp[c] + man1p[c] <=> ppi[c] + gdpmann[c]	0
MECDPS	2p4c2me[c] <=> cmp[c] + 2mecdp[c]	0.000649226		MECDPS	2p4c2me[c] <=> cmp[c] + 2mecdp[c]	0.000759787		MECDPS	2p4c2me[c] <=> cmp[c] + 2mecdp[c]	0.000451124		MECDPS	2p4c2me[c] <=> cmp[c] + 2mecdp[c]	0.000150931		MECDPS	2p4c2me[c] <=> cmp[c] + 2mecdp[c]	0.000389508		MECDPS	2p4c2me[c] <=> cmp[c] + 2mecdp[c]	9.40942e-05
MEPCT	ctp[c] + 2me4p[c] <=> ppi[c] + 4c2me[c]	0.000649226		MEPCT	ctp[c] + 2me4p[c] <=> ppi[c] + 4c2me[c]	0.000759787		MEPCT	ctp[c] + 2me4p[c] <=> ppi[c] + 4c2me[c]	0.000451124		MEPCT	ctp[c] + 2me4p[c] <=> ppi[c] + 4c2me[c]	0.000150931		MEPCT	ctp[c] + 2me4p[c] <=> ppi[c] + 4c2me[c]	0.000389508		MEPCT	ctp[c] + 2me4p[c] <=> ppi[c] + 4c2me[c]	9.40942e-05
MOHMT	h2o[c] + mlthf[c] + 3mob[c] <=> thf[c] + 2dhp[c]	0.000628875		MOHMT	h2o[c] + mlthf[c] + 3mob[c] <=> thf[c] + 2dhp[c]	0.00073597		MOHMT	h2o[c] + mlthf[c] + 3mob[c] <=> thf[c] + 2dhp[c]	0.000436983		MOHMT	h2o[c] + mlthf[c] + 3mob[c] <=> thf[c] + 2dhp[c]	0.0001462		MOHMT	h2o[c] + mlthf[c] + 3mob[c] <=> thf[c] + 2dhp[c]	0.000377298		MOHMT	h2o[c] + mlthf[c] + 3mob[c] <=> thf[c] + 2dhp[c]	9.11446e-05
NADK	atp[c] + nad[c] <=> nadp[c] + h[c] + adp[c]	1000		NADK	atp[c] + nad[c] <=> nadp[c] + h[c] + adp[c]	1000		NADK	atp[c] + nad[c] <=> nadp[c] + h[c] + adp[c]	1000		NADK	atp[c] + nad[c] <=> nadp[c] + h[c] + adp[c]	1000		NADK	atp[c] + nad[c] <=> nadp[c] + h[c] + adp[c]	1000		NADK	atp[c] + nad[c] <=> nadp[c] + h[c] + adp[c]	1000
NADS1	atp[c] + nh4[c] + dnad[c] -> amp[c] + nad[c] + ppi[c]	0.00573869		NADS1	atp[c] + nh4[c] + dnad[c] -> amp[c] + nad[c] + ppi[c]	0.00671598		NADS1	atp[c] + nh4[c] + dnad[c] -> amp[c] + nad[c] + ppi[c]	0.00398762		NADS1	atp[c] + nh4[c] + dnad[c] -> amp[c] + nad[c] + ppi[c]	0.00133412		NADS1	atp[c] + nh4[c] + dnad[c] -> amp[c] + nad[c] + ppi[c]	0.00344297		NADS1	atp[c] + nh4[c] + dnad[c] -> amp[c] + nad[c] + ppi[c]	0
NADS2	h2o[c] + atp[c] + gln-L[c] + dnad[c] -> glu-L[c] + amp[c] + nad[c] + ppi[c]	0		NADS2	h2o[c] + atp[c] + gln-L[c] + dnad[c] -> glu-L[c] + amp[c] + nad[c] + ppi[c]	0		NADS2	h2o[c] + atp[c] + gln-L[c] + dnad[c] -> glu-L[c] + amp[c] + nad[c] + ppi[c]	0		NADS2	h2o[c] + atp[c] + gln-L[c] + dnad[c] -> glu-L[c] + amp[c] + nad[c] + ppi[c]	0		NADS2	h2o[c] + atp[c] + gln-L[c] + dnad[c] -> glu-L[c] + amp[c] + nad[c] + ppi[c]	0		NADS2	h2o[c] + atp[c] + gln-L[c] + dnad[c] -> glu-L[c] + amp[c] + nad[c] + ppi[c]	0.000831725
NNAM	h2o[c] + ncam[c] -> nh4[c] + nac[c]	0		NNAM	h2o[c] + ncam[c] -> nh4[c] + nac[c]	0		NNAM	h2o[c] + ncam[c] -> nh4[c] + nac[c]	0		NNAM	h2o[c] + ncam[c] -> nh4[c] + nac[c]	0		NNAM	h2o[c] + ncam[c] -> nh4[c] + nac[c]	0		NNAM	h2o[c] + ncam[c] -> nh4[c] + nac[c]	0
NNATr	atp[c] + nicrnt[c] <=> ppi[c] + dnad[c]	0.00573869		NNATr	atp[c] + nicrnt[c] <=> ppi[c] + dnad[c]	0.00671598		NNATr	atp[c] + nicrnt[c] <=> ppi[c] + dnad[c]	0.00398762		NNATr	atp[c] + nicrnt[c] <=> ppi[c] + dnad[c]	0.00133412		NNATr	atp[c] + nicrnt[c] <=> ppi[c] + dnad[c]	0.00344297		NNATr	atp[c] + nicrnt[c] <=> ppi[c] + dnad[c]	0.000831725
NNDPR	2 h[c] + prpp[c] + quln[c] -> ppi[c] + co2[c] + nicrnt[c]	0		NNDPR	2 h[c] + prpp[c] + quln[c] -> ppi[c] + co2[c] + nicrnt[c]	0		NNDPR	2 h[c] + prpp[c] + quln[c] -> ppi[c] + co2[c] + nicrnt[c]	0		NNDPR	2 h[c] + prpp[c] + quln[c] -> ppi[c] + co2[c] + nicrnt[c]	0		NNDPR	2 h[c] + prpp[c] + quln[c] -> ppi[c] + co2[c] + nicrnt[c]	0		NNDPR	2 h[c] + prpp[c] + quln[c] -> ppi[c] + co2[c] + nicrnt[c]	0
OPHBDC	h[c] + 3ophb[c] -> co2[c] + 2oph[c]	0		OPHBDC	h[c] + 3ophb[c] -> co2[c] + 2oph[c]	0		OPHBDC	h[c] + 3ophb[c] -> co2[c] + 2oph[c]	0		OPHBDC	h[c] + 3ophb[c] -> co2[c] + 2oph[c]	0		OPHBDC	h[c] + 3ophb[c] -> co2[c] + 2oph[c]	0		OPHBDC	h[c] + 3ophb[c] -> co2[c] + 2oph[c]	0
PANTS	atp[c] + ala-B[c] + pant-R[c] -> amp[c] + ppi[c] + pnto-R[c]	0.000628875		PANTS	atp[c] + ala-B[c] + pant-R[c] -> amp[c] + ppi[c] + pnto-R[c]	0.00073597		PANTS	atp[c] + ala-B[c] + pant-R[c] -> amp[c] + ppi[c] + pnto-R[c]	0.000436983		PANTS	atp[c] + ala-B[c] + pant-R[c] -> amp[c] + ppi[c] + pnto-R[c]	0.0001462		PANTS	atp[c] + ala-B[c] + pant-R[c] -> amp[c] + ppi[c] + pnto-R[c]	0.000377298		PANTS	atp[c] + ala-B[c] + pant-R[c] -> amp[c] + ppi[c] + pnto-R[c]	9.11446e-05
PMPK	atp[c] + 4ampm[c] <=> adp[c] + 2mahmp[c]	0		PMPK	atp[c] + 4ampm[c] <=> adp[c] + 2mahmp[c]	0		PMPK	atp[c] + 4ampm[c] <=> adp[c] + 2mahmp[c]	0		PMPK	atp[c] + 4ampm[c] <=> adp[c] + 2mahmp[c]	0		PMPK	atp[c] + 4ampm[c] <=> adp[c] + 2mahmp[c]	0		PMPK	atp[c] + 4ampm[c] <=> adp[c] + 2mahmp[c]	0
PNTK	atp[c] + pnto-R[c] <=> adp[c] + 4ppan[c]	0.000628875		PNTK	atp[c] + pnto-R[c] <=> adp[c] + 4ppan[c]	0.00073597		PNTK	atp[c] + pnto-R[c] <=> adp[c] + 4ppan[c]	0.000436983		PNTK	atp[c] + pnto-R[c] <=> adp[c] + 4ppan[c]	0.0001462		PNTK	atp[c] + pnto-R[c] <=> adp[c] + 4ppan[c]	0.000377298		PNTK	atp[c] + pnto-R[c] <=> adp[c] + 4ppan[c]	9.11446e-05
PPCDC	h[c] + 4ppcys[c] -> co2[c] + pan4p[c]	0.000628875		PPCDC	h[c] + 4ppcys[c] -> co2[c] + pan4p[c]	0.00073597		PPCDC	h[c] + 4ppcys[c] -> co2[c] + pan4p[c]	0.000436983		PPCDC	h[c] + 4ppcys[c] -> co2[c] + pan4p[c]	0.0001462		PPCDC	h[c] + 4ppcys[c] -> co2[c] + pan4p[c]	0.000377298		PPCDC	h[c] + 4ppcys[c] -> co2[c] + pan4p[c]	9.11446e-05
PPNCL2	ctp[c] + cys-L[c] + 4ppan[c] -> cmp[c] + ppi[c] + 4ppcys[c]	0.000628875		PPNCL2	ctp[c] + cys-L[c] + 4ppan[c] -> cmp[c] + ppi[c] + 4ppcys[c]	0.00073597		PPNCL2	ctp[c] + cys-L[c] + 4ppan[c] -> cmp[c] + ppi[c] + 4ppcys[c]	0.000436983		PPNCL2	ctp[c] + cys-L[c] + 4ppan[c] -> cmp[c] + ppi[c] + 4ppcys[c]	0.0001462		PPNCL2	ctp[c] + cys-L[c] + 4ppan[c] -> cmp[c] + ppi[c] + 4ppcys[c]	0.000377298		PPNCL2	ctp[c] + cys-L[c] + 4ppan[c] -> cmp[c] + ppi[c] + 4ppcys[c]	9.11446e-05
PTPAT	atp[c] + pan4p[c] <=> ppi[c] + dpcoa[c]	0.000628875		PTPAT	atp[c] + pan4p[c] <=> ppi[c] + dpcoa[c]	0.00073597		PTPAT	atp[c] + pan4p[c] <=> ppi[c] + dpcoa[c]	0.000436983		PTPAT	atp[c] + pan4p[c] <=> ppi[c] + dpcoa[c]	0.0001462		PTPAT	atp[c] + pan4p[c] <=> ppi[c] + dpcoa[c]	0.000377298		PTPAT	atp[c] + pan4p[c] <=> ppi[c] + dpcoa[c]	9.11446e-05
RBFK	atp[c] + ribflv[c] <=> adp[c] + fmn[c]	0		RBFK	atp[c] + ribflv[c] <=> adp[c] + fmn[c]	0		RBFK	atp[c] + ribflv[c] <=> adp[c] + fmn[c]	0		RBFK	atp[c] + ribflv[c] <=> adp[c] + fmn[c]	0		RBFK	atp[c] + ribflv[c] <=> adp[c] + fmn[c]	0		RBFK	atp[c] + ribflv[c] <=> adp[c] + fmn[c]	0
RBFSa	db4p[c] + 4r5au[c] <=> 2 h2o[c] + pi[c] + h[c] + dmlz[c]	0.000463733		RBFSa	db4p[c] + 4r5au[c] <=> 2 h2o[c] + pi[c] + h[c] + dmlz[c]	0.000542705		RBFSa	db4p[c] + 4r5au[c] <=> 2 h2o[c] + pi[c] + h[c] + dmlz[c]	0.000322232		RBFSa	db4p[c] + 4r5au[c] <=> 2 h2o[c] + pi[c] + h[c] + dmlz[c]	0.000107808		RBFSa	db4p[c] + 4r5au[c] <=> 2 h2o[c] + pi[c] + h[c] + dmlz[c]	0.00027822		RBFSa	db4p[c] + 4r5au[c] <=> 2 h2o[c] + pi[c] + h[c] + dmlz[c]	6.72101e-05
RBFSb	2 dmlz[c] -> ribflv[c] + 4r5au[c]	0.000231866		RBFSb	2 dmlz[c] -> ribflv[c] + 4r5au[c]	0.000271353		RBFSb	2 dmlz[c] -> ribflv[c] + 4r5au[c]	0.000161116		RBFSb	2 dmlz[c] -> ribflv[c] + 4r5au[c]	5.3904e-05		RBFSb	2 dmlz[c] -> ribflv[c] + 4r5au[c]	0.00013911		RBFSb	2 dmlz[c] -> ribflv[c] + 4r5au[c]	3.36051e-05
THFGLUS	atp[c] + glu-L[c] + thf[c] -> pi[c] + h[c] + adp[c] + thfglu[c]	0		THFGLUS	atp[c] + glu-L[c] + thf[c] -> pi[c] + h[c] + adp[c] + thfglu[c]	0		THFGLUS	atp[c] + glu-L[c] + thf[c] -> pi[c] + h[c] + adp[c] + thfglu[c]	0		THFGLUS	atp[c] + glu-L[c] + thf[c] -> pi[c] + h[c] + adp[c] + thfglu[c]	0		THFGLUS	atp[c] + glu-L[c] + thf[c] -> pi[c] + h[c] + adp[c] + thfglu[c]	0		THFGLUS	atp[c] + glu-L[c] + thf[c] -> pi[c] + h[c] + adp[c] + thfglu[c]	0
THZPSN	atp[c] + tyr-L[c] + cys-L[c] + dxyl5p[c] -> h2o[c] + amp[c] + ala-L[c] + ppi[c] + co2[c] + 4mpetz[c] + 4hba[c]	0		THZPSN	atp[c] + tyr-L[c] + cys-L[c] + dxyl5p[c] -> h2o[c] + amp[c] + ala-L[c] + ppi[c] + co2[c] + 4mpetz[c] + 4hba[c]	0		THZPSN	atp[c] + tyr-L[c] + cys-L[c] + dxyl5p[c] -> h2o[c] + amp[c] + ala-L[c] + ppi[c] + co2[c] + 4mpetz[c] + 4hba[c]	0		THZPSN	atp[c] + tyr-L[c] + cys-L[c] + dxyl5p[c] -> h2o[c] + amp[c] + ala-L[c] + ppi[c] + co2[c] + 4mpetz[c] + 4hba[c]	0		THZPSN	atp[c] + tyr-L[c] + cys-L[c] + dxyl5p[c] -> h2o[c] + amp[c] + ala-L[c] + ppi[c] + co2[c] + 4mpetz[c] + 4hba[c]	0		THZPSN	atp[c] + tyr-L[c] + cys-L[c] + dxyl5p[c] -> h2o[c] + amp[c] + ala-L[c] + ppi[c] + co2[c] + 4mpetz[c] + 4hba[c]	0
TMPKr	atp[c] + thmmp[c] <=> adp[c] + thmpp[c]	0		TMPKr	atp[c] + thmmp[c] <=> adp[c] + thmpp[c]	0		TMPKr	atp[c] + thmmp[c] <=> adp[c] + thmpp[c]	0		TMPKr	atp[c] + thmmp[c] <=> adp[c] + thmpp[c]	0		TMPKr	atp[c] + thmmp[c] <=> adp[c] + thmpp[c]	0		TMPKr	atp[c] + thmmp[c] <=> adp[c] + thmpp[c]	0
TMPPP	h[c] + 4mpetz[c] + 2mahmp[c] <=> ppi[c] + thmmp[c]	0		TMPPP	h[c] + 4mpetz[c] + 2mahmp[c] <=> ppi[c] + thmmp[c]	0		TMPPP	h[c] + 4mpetz[c] + 2mahmp[c] <=> ppi[c] + thmmp[c]	0		TMPPP	h[c] + 4mpetz[c] + 2mahmp[c] <=> ppi[c] + thmmp[c]	0		TMPPP	h[c] + 4mpetz[c] + 2mahmp[c] <=> ppi[c] + thmmp[c]	0		TMPPP	h[c] + 4mpetz[c] + 2mahmp[c] <=> ppi[c] + thmmp[c]	0
URFGTT	amet[c] + 2ombz[c] -> h[c] + 2ommb[c] + ahcys[c]	0		URFGTT	amet[c] + 2ombz[c] -> h[c] + 2ommb[c] + ahcys[c]	0		URFGTT	amet[c] + 2ombz[c] -> h[c] + 2ommb[c] + ahcys[c]	0		URFGTT	amet[c] + 2ombz[c] -> h[c] + 2ommb[c] + ahcys[c]	0		URFGTT	amet[c] + 2ombz[c] -> h[c] + 2ommb[c] + ahcys[c]	0		URFGTT	amet[c] + 2ombz[c] -> h[c] + 2ommb[c] + ahcys[c]	0
AHC	h2o[c] + ahcys[c] <=> hcys-L[c] + adn[c]	0.00113614		AHC	h2o[c] + ahcys[c] <=> hcys-L[c] + adn[c]	0.00132963		AHC	h2o[c] + ahcys[c] <=> hcys-L[c] + adn[c]	0.000789468		AHC	h2o[c] + ahcys[c] <=> hcys-L[c] + adn[c]	0.00026413		AHC	h2o[c] + ahcys[c] <=> hcys-L[c] + adn[c]	0.000681639		AHC	h2o[c] + ahcys[c] <=> hcys-L[c] + adn[c]	0.000164665
CMLDC	h[c] + 2c25dho[c] -> co2[c] + 5odhf2a[c]	0		CMLDC	h[c] + 2c25dho[c] -> co2[c] + 5odhf2a[c]	0		CMLDC	h[c] + 2c25dho[c] -> co2[c] + 5odhf2a[c]	0		CMLDC	h[c] + 2c25dho[c] -> co2[c] + 5odhf2a[c]	0		CMLDC	h[c] + 2c25dho[c] -> co2[c] + 5odhf2a[c]	0		CMLDC	h[c] + 2c25dho[c] -> co2[c] + 5odhf2a[c]	0
DGK1	atp[c] + dgmp[c] <=> adp[c] + dgdp[c]	0		DGK1	atp[c] + dgmp[c] <=> adp[c] + dgdp[c]	0		DGK1	atp[c] + dgmp[c] <=> adp[c] + dgdp[c]	0		DGK1	atp[c] + dgmp[c] <=> adp[c] + dgdp[c]	0		DGK1	atp[c] + dgmp[c] <=> adp[c] + dgdp[c]	0		DGK1	atp[c] + dgmp[c] <=> adp[c] + dgdp[c]	0
G3PD2	nadp[c] + glyc3p[c] <=> nadph[c] + h[c] + dhap[c]	999.933		G3PD2	nadp[c] + glyc3p[c] <=> nadph[c] + h[c] + dhap[c]	999.921		G3PD2	nadp[c] + glyc3p[c] <=> nadph[c] + h[c] + dhap[c]	-1000		G3PD2	nadp[c] + glyc3p[c] <=> nadph[c] + h[c] + dhap[c]	5.37176		G3PD2	nadp[c] + glyc3p[c] <=> nadph[c] + h[c] + dhap[c]	-1000		G3PD2	nadp[c] + glyc3p[c] <=> nadph[c] + h[c] + dhap[c]	-42.783
GK1	atp[c] + gmp[c] <=> gdp[c] + adp[c]	1000		GK1	atp[c] + gmp[c] <=> gdp[c] + adp[c]	1000		GK1	atp[c] + gmp[c] <=> gdp[c] + adp[c]	0.00471264		GK1	atp[c] + gmp[c] <=> gdp[c] + adp[c]	1000		GK1	atp[c] + gmp[c] <=> gdp[c] + adp[c]	0.00406897		GK1	atp[c] + gmp[c] <=> gdp[c] + adp[c]	-999.999
GK2	gmp[c] + datp[c] <=> gdp[c] + dadp[c]	-999.993		GK2	gmp[c] + datp[c] <=> gdp[c] + dadp[c]	-999.992		GK2	gmp[c] + datp[c] <=> gdp[c] + dadp[c]	0		GK2	gmp[c] + datp[c] <=> gdp[c] + dadp[c]	-999.998		GK2	gmp[c] + datp[c] <=> gdp[c] + dadp[c]	0		GK2	gmp[c] + datp[c] <=> gdp[c] + dadp[c]	1000
MGSA	dhap[c] -> pi[c] + h[c] + mthgxl[c]	0		MGSA	dhap[c] -> pi[c] + h[c] + mthgxl[c]	0		MGSA	dhap[c] -> pi[c] + h[c] + mthgxl[c]	0		MGSA	dhap[c] -> pi[c] + h[c] + mthgxl[c]	0		MGSA	dhap[c] -> pi[c] + h[c] + mthgxl[c]	0		MGSA	dhap[c] -> pi[c] + h[c] + mthgxl[c]	0
NITr	16 h2o[c] + 16 atp[c] + 8 fdxrd[c] + n2[c] <=> 16 pi[c] + 6 h[c] + 16 adp[c] + 2 nh4[c] + 8 fdxox[c] + h2[c]	0		NITr	16 h2o[c] + 16 atp[c] + 8 fdxrd[c] + n2[c] <=> 16 pi[c] + 6 h[c] + 16 adp[c] + 2 nh4[c] + 8 fdxox[c] + h2[c]	0		NITr	16 h2o[c] + 16 atp[c] + 8 fdxrd[c] + n2[c] <=> 16 pi[c] + 6 h[c] + 16 adp[c] + 2 nh4[c] + 8 fdxox[c] + h2[c]	0		NITr	16 h2o[c] + 16 atp[c] + 8 fdxrd[c] + n2[c] <=> 16 pi[c] + 6 h[c] + 16 adp[c] + 2 nh4[c] + 8 fdxox[c] + h2[c]	0		NITr	16 h2o[c] + 16 atp[c] + 8 fdxrd[c] + n2[c] <=> 16 pi[c] + 6 h[c] + 16 adp[c] + 2 nh4[c] + 8 fdxox[c] + h2[c]	0		NITr	16 h2o[c] + 16 atp[c] + 8 fdxrd[c] + n2[c] <=> 16 pi[c] + 6 h[c] + 16 adp[c] + 2 nh4[c] + 8 fdxox[c] + h2[c]	0
NTRIRx	5 h[c] + 3 nadh[c] + no2[c] -> 2 h2o[c] + 3 nad[c] + nh4[c]	0		NTRIRx	5 h[c] + 3 nadh[c] + no2[c] -> 2 h2o[c] + 3 nad[c] + nh4[c]	0		NTRIRx	5 h[c] + 3 nadh[c] + no2[c] -> 2 h2o[c] + 3 nad[c] + nh4[c]	0		NTRIRx	5 h[c] + 3 nadh[c] + no2[c] -> 2 h2o[c] + 3 nad[c] + nh4[c]	0		NTRIRx	5 h[c] + 3 nadh[c] + no2[c] -> 2 h2o[c] + 3 nad[c] + nh4[c]	0		NTRIRx	5 h[c] + 3 nadh[c] + no2[c] -> 2 h2o[c] + 3 nad[c] + nh4[c]	0
NTRIRy	3 nadph[c] + 5 h[c] + no2[c] -> 2 h2o[c] + 3 nadp[c] + nh4[c]	0		NTRIRy	3 nadph[c] + 5 h[c] + no2[c] -> 2 h2o[c] + 3 nadp[c] + nh4[c]	0		NTRIRy	3 nadph[c] + 5 h[c] + no2[c] -> 2 h2o[c] + 3 nadp[c] + nh4[c]	0		NTRIRy	3 nadph[c] + 5 h[c] + no2[c] -> 2 h2o[c] + 3 nadp[c] + nh4[c]	0		NTRIRy	3 nadph[c] + 5 h[c] + no2[c] -> 2 h2o[c] + 3 nadp[c] + nh4[c]	0		NTRIRy	3 nadph[c] + 5 h[c] + no2[c] -> 2 h2o[c] + 3 nadp[c] + nh4[c]	0
PMANM	man6p[c] <=> man1p[c]	0		PMANM	man6p[c] <=> man1p[c]	0		PMANM	man6p[c] <=> man1p[c]	0		PMANM	man6p[c] <=> man1p[c]	0		PMANM	man6p[c] <=> man1p[c]	0		PMANM	man6p[c] <=> man1p[c]	0
PPA	h2o[c] + ppi[c] -> 2 pi[c] + 2 h[c]	0.354335		PPA	h2o[c] + ppi[c] -> 2 pi[c] + 2 h[c]	0.414678		PPA	h2o[c] + ppi[c] -> 2 pi[c] + 2 h[c]	0.246215		PPA	h2o[c] + ppi[c] -> 2 pi[c] + 2 h[c]	0.0823754		PPA	h2o[c] + ppi[c] -> 2 pi[c] + 2 h[c]	0.212586		PPA	h2o[c] + ppi[c] -> 2 pi[c] + 2 h[c]	0.142592
PPM	r1p[c] <=> r5p[c]	0.00113614		PPM	r1p[c] <=> r5p[c]	0.00132963		PPM	r1p[c] <=> r5p[c]	0.000789468		PPM	r1p[c] <=> r5p[c]	0.00026413		PPM	r1p[c] <=> r5p[c]	0.000681639		PPM	r1p[c] <=> r5p[c]	0.000164665
SBTD_D2	nad[c] + sbt-D[c] <=> h[c] + nadh[c] + fru[c]	0		SBTD_D2	nad[c] + sbt-D[c] <=> h[c] + nadh[c] + fru[c]	0		SBTD_D2	nad[c] + sbt-D[c] <=> h[c] + nadh[c] + fru[c]	0		SBTD_D2	nad[c] + sbt-D[c] <=> h[c] + nadh[c] + fru[c]	0		SBTD_D2	nad[c] + sbt-D[c] <=> h[c] + nadh[c] + fru[c]	0		SBTD_D2	nad[c] + sbt-D[c] <=> h[c] + nadh[c] + fru[c]	0
THIORDXi	trdrd[c] + h2o2[c] -> 2 h2o[c] + trdox[c]	0		THIORDXi	trdrd[c] + h2o2[c] -> 2 h2o[c] + trdox[c]	0		THIORDXi	trdrd[c] + h2o2[c] -> 2 h2o[c] + trdox[c]	0		THIORDXi	trdrd[c] + h2o2[c] -> 2 h2o[c] + trdox[c]	0		THIORDXi	trdrd[c] + h2o2[c] -> 2 h2o[c] + trdox[c]	0		THIORDXi	trdrd[c] + h2o2[c] -> 2 h2o[c] + trdox[c]	0
TRDR	nadph[c] + h[c] + trdox[c] <=> nadp[c] + trdrd[c]	0.00809213		TRDR	nadph[c] + h[c] + trdox[c] <=> nadp[c] + trdrd[c]	0.0094702		TRDR	nadph[c] + h[c] + trdox[c] <=> nadp[c] + trdrd[c]	0.00562294		TRDR	nadph[c] + h[c] + trdox[c] <=> nadp[c] + trdrd[c]	0.00188125		TRDR	nadph[c] + h[c] + trdox[c] <=> nadp[c] + trdrd[c]	0.00485494		TRDR	nadph[c] + h[c] + trdox[c] <=> nadp[c] + trdrd[c]	0.00117282
3HAD100	3hdeACP[c] <=> h2o[c] + 2tdeACP[c]	0		3HAD100	3hdeACP[c] <=> h2o[c] + 2tdeACP[c]	0		3HAD100	3hdeACP[c] <=> h2o[c] + 2tdeACP[c]	0		3HAD100	3hdeACP[c] <=> h2o[c] + 2tdeACP[c]	0		3HAD100	3hdeACP[c] <=> h2o[c] + 2tdeACP[c]	0		3HAD100	3hdeACP[c] <=> h2o[c] + 2tdeACP[c]	0
3HAD120	3hddACP[c] <=> h2o[c] + 2tddACP[c]	0		3HAD120	3hddACP[c] <=> h2o[c] + 2tddACP[c]	0		3HAD120	3hddACP[c] <=> h2o[c] + 2tddACP[c]	0		3HAD120	3hddACP[c] <=> h2o[c] + 2tddACP[c]	0		3HAD120	3hddACP[c] <=> h2o[c] + 2tddACP[c]	0		3HAD120	3hddACP[c] <=> h2o[c] + 2tddACP[c]	0
3HAD140	3htdACP[c] <=> h2o[c] + tmrs2eACP[c]	0		3HAD140	3htdACP[c] <=> h2o[c] + tmrs2eACP[c]	0		3HAD140	3htdACP[c] <=> h2o[c] + tmrs2eACP[c]	0		3HAD140	3htdACP[c] <=> h2o[c] + tmrs2eACP[c]	0		3HAD140	3htdACP[c] <=> h2o[c] + tmrs2eACP[c]	0		3HAD140	3htdACP[c] <=> h2o[c] + tmrs2eACP[c]	0
3HAD160	3hpaACP[c] <=> h2o[c] + tpalm2eACP[c]	0		3HAD160	3hpaACP[c] <=> h2o[c] + tpalm2eACP[c]	0		3HAD160	3hpaACP[c] <=> h2o[c] + tpalm2eACP[c]	0		3HAD160	3hpaACP[c] <=> h2o[c] + tpalm2eACP[c]	0		3HAD160	3hpaACP[c] <=> h2o[c] + tpalm2eACP[c]	0		3HAD160	3hpaACP[c] <=> h2o[c] + tpalm2eACP[c]	0
3HAD60	3hhACP[c] <=> h2o[c] + 2theACP[c]	0		3HAD60	3hhACP[c] <=> h2o[c] + 2theACP[c]	0		3HAD60	3hhACP[c] <=> h2o[c] + 2theACP[c]	0		3HAD60	3hhACP[c] <=> h2o[c] + 2theACP[c]	0		3HAD60	3hhACP[c] <=> h2o[c] + 2theACP[c]	0		3HAD60	3hhACP[c] <=> h2o[c] + 2theACP[c]	0
3HAD80	3hocACP[c] <=> h2o[c] + 2toceACP[c]	0		3HAD80	3hocACP[c] <=> h2o[c] + 2toceACP[c]	0		3HAD80	3hocACP[c] <=> h2o[c] + 2toceACP[c]	0		3HAD80	3hocACP[c] <=> h2o[c] + 2toceACP[c]	0		3HAD80	3hocACP[c] <=> h2o[c] + 2toceACP[c]	0		3HAD80	3hocACP[c] <=> h2o[c] + 2toceACP[c]	0
3OAR100	nadp[c] + 3hdeACP[c] <=> nadph[c] + h[c] + 3oxdeACP[c]	0		3OAR100	nadp[c] + 3hdeACP[c] <=> nadph[c] + h[c] + 3oxdeACP[c]	0		3OAR100	nadp[c] + 3hdeACP[c] <=> nadph[c] + h[c] + 3oxdeACP[c]	0		3OAR100	nadp[c] + 3hdeACP[c] <=> nadph[c] + h[c] + 3oxdeACP[c]	0		3OAR100	nadp[c] + 3hdeACP[c] <=> nadph[c] + h[c] + 3oxdeACP[c]	0		3OAR100	nadp[c] + 3hdeACP[c] <=> nadph[c] + h[c] + 3oxdeACP[c]	0
3OAR120	nadp[c] + 3hddACP[c] <=> nadph[c] + h[c] + 3oxddACP[c]	0		3OAR120	nadp[c] + 3hddACP[c] <=> nadph[c] + h[c] + 3oxddACP[c]	0		3OAR120	nadp[c] + 3hddACP[c] <=> nadph[c] + h[c] + 3oxddACP[c]	0		3OAR120	nadp[c] + 3hddACP[c] <=> nadph[c] + h[c] + 3oxddACP[c]	0		3OAR120	nadp[c] + 3hddACP[c] <=> nadph[c] + h[c] + 3oxddACP[c]	0		3OAR120	nadp[c] + 3hddACP[c] <=> nadph[c] + h[c] + 3oxddACP[c]	0
3OAR140	nadp[c] + 3htdACP[c] <=> nadph[c] + h[c] + 3oxtdACP[c]	0		3OAR140	nadp[c] + 3htdACP[c] <=> nadph[c] + h[c] + 3oxtdACP[c]	0		3OAR140	nadp[c] + 3htdACP[c] <=> nadph[c] + h[c] + 3oxtdACP[c]	0		3OAR140	nadp[c] + 3htdACP[c] <=> nadph[c] + h[c] + 3oxtdACP[c]	0		3OAR140	nadp[c] + 3htdACP[c] <=> nadph[c] + h[c] + 3oxtdACP[c]	0		3OAR140	nadp[c] + 3htdACP[c] <=> nadph[c] + h[c] + 3oxtdACP[c]	0
3OAR160	nadp[c] + 3hpaACP[c] <=> nadph[c] + h[c] + 3oxhdACP[c]	0		3OAR160	nadp[c] + 3hpaACP[c] <=> nadph[c] + h[c] + 3oxhdACP[c]	0		3OAR160	nadp[c] + 3hpaACP[c] <=> nadph[c] + h[c] + 3oxhdACP[c]	0		3OAR160	nadp[c] + 3hpaACP[c] <=> nadph[c] + h[c] + 3oxhdACP[c]	0		3OAR160	nadp[c] + 3hpaACP[c] <=> nadph[c] + h[c] + 3oxhdACP[c]	0		3OAR160	nadp[c] + 3hpaACP[c] <=> nadph[c] + h[c] + 3oxhdACP[c]	0
3OAR60	nadp[c] + 3hhACP[c] <=> nadph[c] + h[c] + 3oxhACP[c]	0		3OAR60	nadp[c] + 3hhACP[c] <=> nadph[c] + h[c] + 3oxhACP[c]	0		3OAR60	nadp[c] + 3hhACP[c] <=> nadph[c] + h[c] + 3oxhACP[c]	0		3OAR60	nadp[c] + 3hhACP[c] <=> nadph[c] + h[c] + 3oxhACP[c]	0		3OAR60	nadp[c] + 3hhACP[c] <=> nadph[c] + h[c] + 3oxhACP[c]	0		3OAR60	nadp[c] + 3hhACP[c] <=> nadph[c] + h[c] + 3oxhACP[c]	0
3OAR80	nadp[c] + 3hocACP[c] <=> nadph[c] + h[c] + 3oxocACP[c]	0		3OAR80	nadp[c] + 3hocACP[c] <=> nadph[c] + h[c] + 3oxocACP[c]	0		3OAR80	nadp[c] + 3hocACP[c] <=> nadph[c] + h[c] + 3oxocACP[c]	0		3OAR80	nadp[c] + 3hocACP[c] <=> nadph[c] + h[c] + 3oxocACP[c]	0		3OAR80	nadp[c] + 3hocACP[c] <=> nadph[c] + h[c] + 3oxocACP[c]	0		3OAR80	nadp[c] + 3hocACP[c] <=> nadph[c] + h[c] + 3oxocACP[c]	0
3OAS100	h[c] + octACP[c] + malACP[c] -> co2[c] + ACP[c] + 3oxdeACP[c]	0		3OAS100	h[c] + octACP[c] + malACP[c] -> co2[c] + ACP[c] + 3oxdeACP[c]	0		3OAS100	h[c] + octACP[c] + malACP[c] -> co2[c] + ACP[c] + 3oxdeACP[c]	0		3OAS100	h[c] + octACP[c] + malACP[c] -> co2[c] + ACP[c] + 3oxdeACP[c]	0		3OAS100	h[c] + octACP[c] + malACP[c] -> co2[c] + ACP[c] + 3oxdeACP[c]	0		3OAS100	h[c] + octACP[c] + malACP[c] -> co2[c] + ACP[c] + 3oxdeACP[c]	0
3OAS120	h[c] + malACP[c] + decACP[c] -> co2[c] + ACP[c] + 3oxddACP[c]	0		3OAS120	h[c] + malACP[c] + decACP[c] -> co2[c] + ACP[c] + 3oxddACP[c]	0		3OAS120	h[c] + malACP[c] + decACP[c] -> co2[c] + ACP[c] + 3oxddACP[c]	0		3OAS120	h[c] + malACP[c] + decACP[c] -> co2[c] + ACP[c] + 3oxddACP[c]	0		3OAS120	h[c] + malACP[c] + decACP[c] -> co2[c] + ACP[c] + 3oxddACP[c]	0		3OAS120	h[c] + malACP[c] + decACP[c] -> co2[c] + ACP[c] + 3oxddACP[c]	0
3OAS140	h[c] + ddcaACP[c] + malACP[c] -> co2[c] + ACP[c] + 3oxtdACP[c]	0		3OAS140	h[c] + ddcaACP[c] + malACP[c] -> co2[c] + ACP[c] + 3oxtdACP[c]	0		3OAS140	h[c] + ddcaACP[c] + malACP[c] -> co2[c] + ACP[c] + 3oxtdACP[c]	0		3OAS140	h[c] + ddcaACP[c] + malACP[c] -> co2[c] + ACP[c] + 3oxtdACP[c]	0		3OAS140	h[c] + ddcaACP[c] + malACP[c] -> co2[c] + ACP[c] + 3oxtdACP[c]	0		3OAS140	h[c] + ddcaACP[c] + malACP[c] -> co2[c] + ACP[c] + 3oxtdACP[c]	0
3OAS160	h[c] + myrsACP[c] + malACP[c] -> co2[c] + ACP[c] + 3oxhdACP[c]	0		3OAS160	h[c] + myrsACP[c] + malACP[c] -> co2[c] + ACP[c] + 3oxhdACP[c]	0		3OAS160	h[c] + myrsACP[c] + malACP[c] -> co2[c] + ACP[c] + 3oxhdACP[c]	0		3OAS160	h[c] + myrsACP[c] + malACP[c] -> co2[c] + ACP[c] + 3oxhdACP[c]	0		3OAS160	h[c] + myrsACP[c] + malACP[c] -> co2[c] + ACP[c] + 3oxhdACP[c]	0		3OAS160	h[c] + myrsACP[c] + malACP[c] -> co2[c] + ACP[c] + 3oxhdACP[c]	0
3OAS60	h[c] + malACP[c] + butACP[c] -> co2[c] + ACP[c] + 3oxhACP[c]	0		3OAS60	h[c] + malACP[c] + butACP[c] -> co2[c] + ACP[c] + 3oxhACP[c]	0		3OAS60	h[c] + malACP[c] + butACP[c] -> co2[c] + ACP[c] + 3oxhACP[c]	0		3OAS60	h[c] + malACP[c] + butACP[c] -> co2[c] + ACP[c] + 3oxhACP[c]	0		3OAS60	h[c] + malACP[c] + butACP[c] -> co2[c] + ACP[c] + 3oxhACP[c]	0		3OAS60	h[c] + malACP[c] + butACP[c] -> co2[c] + ACP[c] + 3oxhACP[c]	0
3OAS80	h[c] + malACP[c] + hexACP[c] -> co2[c] + ACP[c] + 3oxocACP[c]	0		3OAS80	h[c] + malACP[c] + hexACP[c] -> co2[c] + ACP[c] + 3oxocACP[c]	0		3OAS80	h[c] + malACP[c] + hexACP[c] -> co2[c] + ACP[c] + 3oxocACP[c]	0		3OAS80	h[c] + malACP[c] + hexACP[c] -> co2[c] + ACP[c] + 3oxocACP[c]	0		3OAS80	h[c] + malACP[c] + hexACP[c] -> co2[c] + ACP[c] + 3oxocACP[c]	0		3OAS80	h[c] + malACP[c] + hexACP[c] -> co2[c] + ACP[c] + 3oxocACP[c]	0
ACACT3r	accoa[c] + hxcoa[c] <=> coa[c] + 3oocoa[c]	0		ACACT3r	accoa[c] + hxcoa[c] <=> coa[c] + 3oocoa[c]	0		ACACT3r	accoa[c] + hxcoa[c] <=> coa[c] + 3oocoa[c]	0		ACACT3r	accoa[c] + hxcoa[c] <=> coa[c] + 3oocoa[c]	0		ACACT3r	accoa[c] + hxcoa[c] <=> coa[c] + 3oocoa[c]	0		ACACT3r	accoa[c] + hxcoa[c] <=> coa[c] + 3oocoa[c]	0
ACACT4r	accoa[c] + occoa[c] <=> coa[c] + 3odcoa[c]	0		ACACT4r	accoa[c] + occoa[c] <=> coa[c] + 3odcoa[c]	0		ACACT4r	accoa[c] + occoa[c] <=> coa[c] + 3odcoa[c]	0		ACACT4r	accoa[c] + occoa[c] <=> coa[c] + 3odcoa[c]	0		ACACT4r	accoa[c] + occoa[c] <=> coa[c] + 3odcoa[c]	0		ACACT4r	accoa[c] + occoa[c] <=> coa[c] + 3odcoa[c]	0
ACACT5r	accoa[c] + dccoa[c] <=> coa[c] + 3oddcoa[c]	0		ACACT5r	accoa[c] + dccoa[c] <=> coa[c] + 3oddcoa[c]	0		ACACT5r	accoa[c] + dccoa[c] <=> coa[c] + 3oddcoa[c]	0		ACACT5r	accoa[c] + dccoa[c] <=> coa[c] + 3oddcoa[c]	0		ACACT5r	accoa[c] + dccoa[c] <=> coa[c] + 3oddcoa[c]	0		ACACT5r	accoa[c] + dccoa[c] <=> coa[c] + 3oddcoa[c]	0
ACACT6r	accoa[c] + ddcoa[c] <=> coa[c] + 3otdcoa[c]	0		ACACT6r	accoa[c] + ddcoa[c] <=> coa[c] + 3otdcoa[c]	0		ACACT6r	accoa[c] + ddcoa[c] <=> coa[c] + 3otdcoa[c]	0		ACACT6r	accoa[c] + ddcoa[c] <=> coa[c] + 3otdcoa[c]	0		ACACT6r	accoa[c] + ddcoa[c] <=> coa[c] + 3otdcoa[c]	0		ACACT6r	accoa[c] + ddcoa[c] <=> coa[c] + 3otdcoa[c]	0
ACACT7r	accoa[c] + tdcoa[c] <=> coa[c] + 3ohdcoa[c]	0		ACACT7r	accoa[c] + tdcoa[c] <=> coa[c] + 3ohdcoa[c]	0		ACACT7r	accoa[c] + tdcoa[c] <=> coa[c] + 3ohdcoa[c]	0		ACACT7r	accoa[c] + tdcoa[c] <=> coa[c] + 3ohdcoa[c]	0		ACACT7r	accoa[c] + tdcoa[c] <=> coa[c] + 3ohdcoa[c]	0		ACACT7r	accoa[c] + tdcoa[c] <=> coa[c] + 3ohdcoa[c]	0
FACOAL140	atp[c] + coa[c] + h[c] + ttdca[c] <=> amp[c] + ppi[c] + tdcoa[c]	0.000317144		FACOAL140	atp[c] + coa[c] + h[c] + ttdca[c] <=> amp[c] + ppi[c] + tdcoa[c]	0.000371153		FACOAL140	atp[c] + coa[c] + h[c] + ttdca[c] <=> amp[c] + ppi[c] + tdcoa[c]	0.000220373		FACOAL140	atp[c] + coa[c] + h[c] + ttdca[c] <=> amp[c] + ppi[c] + tdcoa[c]	7.37293e-05		FACOAL140	atp[c] + coa[c] + h[c] + ttdca[c] <=> amp[c] + ppi[c] + tdcoa[c]	0.000190273		FACOAL140	atp[c] + coa[c] + h[c] + ttdca[c] <=> amp[c] + ppi[c] + tdcoa[c]	4.59647e-05
FACOAL140(ISO)	atp[c] + coa[c] + h[c] + fa1[c] -> amp[c] + ppi[c] + fa1coa[c]	0		FACOAL140(ISO)	atp[c] + coa[c] + h[c] + fa1[c] -> amp[c] + ppi[c] + fa1coa[c]	0		FACOAL140(ISO)	atp[c] + coa[c] + h[c] + fa1[c] -> amp[c] + ppi[c] + fa1coa[c]	0		FACOAL140(ISO)	atp[c] + coa[c] + h[c] + fa1[c] -> amp[c] + ppi[c] + fa1coa[c]	0		FACOAL140(ISO)	atp[c] + coa[c] + h[c] + fa1[c] -> amp[c] + ppi[c] + fa1coa[c]	0		FACOAL140(ISO)	atp[c] + coa[c] + h[c] + fa1[c] -> amp[c] + ppi[c] + fa1coa[c]	0
FACOAL150(anteiso)	atp[c] + coa[c] + h[c] + fa4[c] -> amp[c] + ppi[c] + fa4coa[c]	0.000574356		FACOAL150(anteiso)	atp[c] + coa[c] + h[c] + fa4[c] -> amp[c] + ppi[c] + fa4coa[c]	0.000672167		FACOAL150(anteiso)	atp[c] + coa[c] + h[c] + fa4[c] -> amp[c] + ppi[c] + fa4coa[c]	0.0003991		FACOAL150(anteiso)	atp[c] + coa[c] + h[c] + fa4[c] -> amp[c] + ppi[c] + fa4coa[c]	0.000133526		FACOAL150(anteiso)	atp[c] + coa[c] + h[c] + fa4[c] -> amp[c] + ppi[c] + fa4coa[c]	0.000344589		FACOAL150(anteiso)	atp[c] + coa[c] + h[c] + fa4[c] -> amp[c] + ppi[c] + fa4coa[c]	8.32431e-05
FACOAL150(ISO)	atp[c] + coa[c] + h[c] + fa3[c] -> amp[c] + ppi[c] + fa3coa[c]	0.00951933		FACOAL150(ISO)	atp[c] + coa[c] + h[c] + fa3[c] -> amp[c] + ppi[c] + fa3coa[c]	0.0111404		FACOAL150(ISO)	atp[c] + coa[c] + h[c] + fa3[c] -> amp[c] + ppi[c] + fa3coa[c]	0.00661465		FACOAL150(ISO)	atp[c] + coa[c] + h[c] + fa3[c] -> amp[c] + ppi[c] + fa3coa[c]	0.00221304		FACOAL150(ISO)	atp[c] + coa[c] + h[c] + fa3[c] -> amp[c] + ppi[c] + fa3coa[c]	0.00571119		FACOAL150(ISO)	atp[c] + coa[c] + h[c] + fa3[c] -> amp[c] + ppi[c] + fa3coa[c]	0.00137966
FACOAL160	atp[c] + coa[c] + h[c] + hdca[c] -> amp[c] + ppi[c] + pmtcoa[c]	0.00532653		FACOAL160	atp[c] + coa[c] + h[c] + hdca[c] -> amp[c] + ppi[c] + pmtcoa[c]	0.00623362		FACOAL160	atp[c] + coa[c] + h[c] + hdca[c] -> amp[c] + ppi[c] + pmtcoa[c]	0.00370122		FACOAL160	atp[c] + coa[c] + h[c] + hdca[c] -> amp[c] + ppi[c] + pmtcoa[c]	0.0012383		FACOAL160	atp[c] + coa[c] + h[c] + hdca[c] -> amp[c] + ppi[c] + pmtcoa[c]	0.00319569		FACOAL160	atp[c] + coa[c] + h[c] + hdca[c] -> amp[c] + ppi[c] + pmtcoa[c]	0.000771989
FACOAL160(ISO)	atp[c] + coa[c] + h[c] + fa6[c] -> amp[c] + ppi[c] + fa6coa[c]	0		FACOAL160(ISO)	atp[c] + coa[c] + h[c] + fa6[c] -> amp[c] + ppi[c] + fa6coa[c]	0		FACOAL160(ISO)	atp[c] + coa[c] + h[c] + fa6[c] -> amp[c] + ppi[c] + fa6coa[c]	0		FACOAL160(ISO)	atp[c] + coa[c] + h[c] + fa6[c] -> amp[c] + ppi[c] + fa6coa[c]	0		FACOAL160(ISO)	atp[c] + coa[c] + h[c] + fa6[c] -> amp[c] + ppi[c] + fa6coa[c]	0		FACOAL160(ISO)	atp[c] + coa[c] + h[c] + fa6[c] -> amp[c] + ppi[c] + fa6coa[c]	0
FACOAL161	atp[c] + coa[c] + h[c] + hdcea[c] <=> amp[c] + ppi[c] + hdcoa[c]	0.000476965		FACOAL161	atp[c] + coa[c] + h[c] + hdcea[c] <=> amp[c] + ppi[c] + hdcoa[c]	0.000558191		FACOAL161	atp[c] + coa[c] + h[c] + hdcea[c] <=> amp[c] + ppi[c] + hdcoa[c]	0.000331427		FACOAL161	atp[c] + coa[c] + h[c] + hdcea[c] <=> amp[c] + ppi[c] + hdcoa[c]	0.000110884		FACOAL161	atp[c] + coa[c] + h[c] + hdcea[c] <=> amp[c] + ppi[c] + hdcoa[c]	0.000286159		FACOAL161	atp[c] + coa[c] + h[c] + hdcea[c] <=> amp[c] + ppi[c] + hdcoa[c]	6.91279e-05
FACOAL170(ISO)	atp[c] + coa[c] + h[c] + fa11[c] -> amp[c] + ppi[c] + fa11coa[c]	0		FACOAL170(ISO)	atp[c] + coa[c] + h[c] + fa11[c] -> amp[c] + ppi[c] + fa11coa[c]	0		FACOAL170(ISO)	atp[c] + coa[c] + h[c] + fa11[c] -> amp[c] + ppi[c] + fa11coa[c]	0		FACOAL170(ISO)	atp[c] + coa[c] + h[c] + fa11[c] -> amp[c] + ppi[c] + fa11coa[c]	0		FACOAL170(ISO)	atp[c] + coa[c] + h[c] + fa11[c] -> amp[c] + ppi[c] + fa11coa[c]	0		FACOAL170(ISO)	atp[c] + coa[c] + h[c] + fa11[c] -> amp[c] + ppi[c] + fa11coa[c]	0
FACOAL170(anteiso)	atp[c] + coa[c] + h[c] + fa12[c] -> amp[c] + ppi[c] + fa12coa[c]	0.0074916		FACOAL170(anteiso)	atp[c] + coa[c] + h[c] + fa12[c] -> amp[c] + ppi[c] + fa12coa[c]	0.0087674		FACOAL170(anteiso)	atp[c] + coa[c] + h[c] + fa12[c] -> amp[c] + ppi[c] + fa12coa[c]	0.00520565		FACOAL170(anteiso)	atp[c] + coa[c] + h[c] + fa12[c] -> amp[c] + ppi[c] + fa12coa[c]	0.00174164		FACOAL170(anteiso)	atp[c] + coa[c] + h[c] + fa12[c] -> amp[c] + ppi[c] + fa12coa[c]	0.00449464		FACOAL170(anteiso)	atp[c] + coa[c] + h[c] + fa12[c] -> amp[c] + ppi[c] + fa12coa[c]	0.00108578
FACOAL180	atp[c] + coa[c] + h[c] + ocdca[c] <=> amp[c] + ppi[c] + stcoa[c]	0.000928958		FACOAL180	atp[c] + coa[c] + h[c] + ocdca[c] <=> amp[c] + ppi[c] + stcoa[c]	0.00108716		FACOAL180	atp[c] + coa[c] + h[c] + ocdca[c] <=> amp[c] + ppi[c] + stcoa[c]	0.000645501		FACOAL180	atp[c] + coa[c] + h[c] + ocdca[c] <=> amp[c] + ppi[c] + stcoa[c]	0.000215963		FACOAL180	atp[c] + coa[c] + h[c] + ocdca[c] <=> amp[c] + ppi[c] + stcoa[c]	0.000557336		FACOAL180	atp[c] + coa[c] + h[c] + ocdca[c] <=> amp[c] + ppi[c] + stcoa[c]	0.000134637
FACOAL181	atp[c] + coa[c] + h[c] + ocdcea[c] <=> amp[c] + ppi[c] + odecoa[c]	0.000334625		FACOAL181	atp[c] + coa[c] + h[c] + ocdcea[c] <=> amp[c] + ppi[c] + odecoa[c]	0.000391611		FACOAL181	atp[c] + coa[c] + h[c] + ocdcea[c] <=> amp[c] + ppi[c] + odecoa[c]	0.000232519		FACOAL181	atp[c] + coa[c] + h[c] + ocdcea[c] <=> amp[c] + ppi[c] + odecoa[c]	7.77932e-05		FACOAL181	atp[c] + coa[c] + h[c] + ocdcea[c] <=> amp[c] + ppi[c] + odecoa[c]	0.000200761		FACOAL181	atp[c] + coa[c] + h[c] + ocdcea[c] <=> amp[c] + ppi[c] + odecoa[c]	4.84981e-05
G3PAT180	ocdcaACP[c] + glyc3p[c] -> ACP[c] + 1odecg3p[c]	0		G3PAT180	ocdcaACP[c] + glyc3p[c] -> ACP[c] + 1odecg3p[c]	0		G3PAT180	ocdcaACP[c] + glyc3p[c] -> ACP[c] + 1odecg3p[c]	0		G3PAT180	ocdcaACP[c] + glyc3p[c] -> ACP[c] + 1odecg3p[c]	0		G3PAT180	ocdcaACP[c] + glyc3p[c] -> ACP[c] + 1odecg3p[c]	0		G3PAT180	ocdcaACP[c] + glyc3p[c] -> ACP[c] + 1odecg3p[c]	0
HODHL8	3hbACP[c] <=> h2o[c] + 2beACP[c]	0		HODHL8	3hbACP[c] <=> h2o[c] + 2beACP[c]	0		HODHL8	3hbACP[c] <=> h2o[c] + 2beACP[c]	0		HODHL8	3hbACP[c] <=> h2o[c] + 2beACP[c]	0		HODHL8	3hbACP[c] <=> h2o[c] + 2beACP[c]	0		HODHL8	3hbACP[c] <=> h2o[c] + 2beACP[c]	0
HODR8	nadph[c] + h[c] + 3oodacp[c] <=> nadp[c] + 3hodacp[c]	0		HODR8	nadph[c] + h[c] + 3oodacp[c] <=> nadp[c] + 3hodacp[c]	0		HODR8	nadph[c] + h[c] + 3oodacp[c] <=> nadp[c] + 3hodacp[c]	0		HODR8	nadph[c] + h[c] + 3oodacp[c] <=> nadp[c] + 3hodacp[c]	0		HODR8	nadph[c] + h[c] + 3oodacp[c] <=> nadp[c] + 3hodacp[c]	0		HODR8	nadph[c] + h[c] + 3oodacp[c] <=> nadp[c] + 3hodacp[c]	0
KAS12	12 nadph[c] + 17 h[c] + 2mbcoa[c] + 6 malcoa[c] -> 5 h2o[c] + 7 coa[c] + 12 nadp[c] + 6 co2[c] + fa12[c]	0.0074916		KAS12	12 nadph[c] + 17 h[c] + 2mbcoa[c] + 6 malcoa[c] -> 5 h2o[c] + 7 coa[c] + 12 nadp[c] + 6 co2[c] + fa12[c]	0.0087674		KAS12	12 nadph[c] + 17 h[c] + 2mbcoa[c] + 6 malcoa[c] -> 5 h2o[c] + 7 coa[c] + 12 nadp[c] + 6 co2[c] + fa12[c]	0.00520565		KAS12	12 nadph[c] + 17 h[c] + 2mbcoa[c] + 6 malcoa[c] -> 5 h2o[c] + 7 coa[c] + 12 nadp[c] + 6 co2[c] + fa12[c]	0.00174164		KAS12	12 nadph[c] + 17 h[c] + 2mbcoa[c] + 6 malcoa[c] -> 5 h2o[c] + 7 coa[c] + 12 nadp[c] + 6 co2[c] + fa12[c]	0.00449464		KAS12	12 nadph[c] + 17 h[c] + 2mbcoa[c] + 6 malcoa[c] -> 5 h2o[c] + 7 coa[c] + 12 nadp[c] + 6 co2[c] + fa12[c]	0.00108578
KAS13	16 nadph[c] + accoa[c] + 23 h[c] + 8 malcoa[c] -> 7 h2o[c] + 9 coa[c] + 16 nadp[c] + 8 co2[c] + ocdca[c]	0.000928958		KAS13	16 nadph[c] + accoa[c] + 23 h[c] + 8 malcoa[c] -> 7 h2o[c] + 9 coa[c] + 16 nadp[c] + 8 co2[c] + ocdca[c]	0.00108716		KAS13	16 nadph[c] + accoa[c] + 23 h[c] + 8 malcoa[c] -> 7 h2o[c] + 9 coa[c] + 16 nadp[c] + 8 co2[c] + ocdca[c]	0.000645501		KAS13	16 nadph[c] + accoa[c] + 23 h[c] + 8 malcoa[c] -> 7 h2o[c] + 9 coa[c] + 16 nadp[c] + 8 co2[c] + ocdca[c]	0.000215963		KAS13	16 nadph[c] + accoa[c] + 23 h[c] + 8 malcoa[c] -> 7 h2o[c] + 9 coa[c] + 16 nadp[c] + 8 co2[c] + ocdca[c]	0.000557336		KAS13	16 nadph[c] + accoa[c] + 23 h[c] + 8 malcoa[c] -> 7 h2o[c] + 9 coa[c] + 16 nadp[c] + 8 co2[c] + ocdca[c]	0.000134637
KAS14	h[c] + malACP[c] + acACP[c] -> co2[c] + ACP[c] + actACP[c]	0		KAS14	h[c] + malACP[c] + acACP[c] -> co2[c] + ACP[c] + actACP[c]	0		KAS14	h[c] + malACP[c] + acACP[c] -> co2[c] + ACP[c] + actACP[c]	0		KAS14	h[c] + malACP[c] + acACP[c] -> co2[c] + ACP[c] + actACP[c]	0		KAS14	h[c] + malACP[c] + acACP[c] -> co2[c] + ACP[c] + actACP[c]	0		KAS14	h[c] + malACP[c] + acACP[c] -> co2[c] + ACP[c] + actACP[c]	0
KAS15	accoa[c] + h[c] + malACP[c] -> coa[c] + co2[c] + actACP[c]	0		KAS15	accoa[c] + h[c] + malACP[c] -> coa[c] + co2[c] + actACP[c]	0		KAS15	accoa[c] + h[c] + malACP[c] -> coa[c] + co2[c] + actACP[c]	0		KAS15	accoa[c] + h[c] + malACP[c] -> coa[c] + co2[c] + actACP[c]	0		KAS15	accoa[c] + h[c] + malACP[c] -> coa[c] + co2[c] + actACP[c]	0		KAS15	accoa[c] + h[c] + malACP[c] -> coa[c] + co2[c] + actACP[c]	0
KAS17	15 nadph[c] + accoa[c] + 22 h[c] + 8 malcoa[c] -> 7 h2o[c] + 9 coa[c] + 15 nadp[c] + 8 co2[c] + ocdcea[c]	0.000334625		KAS17	15 nadph[c] + accoa[c] + 22 h[c] + 8 malcoa[c] -> 7 h2o[c] + 9 coa[c] + 15 nadp[c] + 8 co2[c] + ocdcea[c]	0.000391611		KAS17	15 nadph[c] + accoa[c] + 22 h[c] + 8 malcoa[c] -> 7 h2o[c] + 9 coa[c] + 15 nadp[c] + 8 co2[c] + ocdcea[c]	0.000232519		KAS17	15 nadph[c] + accoa[c] + 22 h[c] + 8 malcoa[c] -> 7 h2o[c] + 9 coa[c] + 15 nadp[c] + 8 co2[c] + ocdcea[c]	7.77932e-05		KAS17	15 nadph[c] + accoa[c] + 22 h[c] + 8 malcoa[c] -> 7 h2o[c] + 9 coa[c] + 15 nadp[c] + 8 co2[c] + ocdcea[c]	0.000200761		KAS17	15 nadph[c] + accoa[c] + 22 h[c] + 8 malcoa[c] -> 7 h2o[c] + 9 coa[c] + 15 nadp[c] + 8 co2[c] + ocdcea[c]	4.84981e-05
KAS2	12 nadph[c] + accoa[c] + 17 h[c] + 6 malcoa[c] -> 5 h2o[c] + 7 coa[c] + 12 nadp[c] + 6 co2[c] + ttdca[c]	0.000317144		KAS2	12 nadph[c] + accoa[c] + 17 h[c] + 6 malcoa[c] -> 5 h2o[c] + 7 coa[c] + 12 nadp[c] + 6 co2[c] + ttdca[c]	0.000371153		KAS2	12 nadph[c] + accoa[c] + 17 h[c] + 6 malcoa[c] -> 5 h2o[c] + 7 coa[c] + 12 nadp[c] + 6 co2[c] + ttdca[c]	0.000220373		KAS2	12 nadph[c] + accoa[c] + 17 h[c] + 6 malcoa[c] -> 5 h2o[c] + 7 coa[c] + 12 nadp[c] + 6 co2[c] + ttdca[c]	7.37293e-05		KAS2	12 nadph[c] + accoa[c] + 17 h[c] + 6 malcoa[c] -> 5 h2o[c] + 7 coa[c] + 12 nadp[c] + 6 co2[c] + ttdca[c]	0.000190273		KAS2	12 nadph[c] + accoa[c] + 17 h[c] + 6 malcoa[c] -> 5 h2o[c] + 7 coa[c] + 12 nadp[c] + 6 co2[c] + ttdca[c]	4.59647e-05
KAS3	10 nadph[c] + 14 h[c] + 5 malcoa[c] + ivcoa[c] -> 4 h2o[c] + 6 coa[c] + 10 nadp[c] + 5 co2[c] + fa3[c]	0.00951933		KAS3	10 nadph[c] + 14 h[c] + 5 malcoa[c] + ivcoa[c] -> 4 h2o[c] + 6 coa[c] + 10 nadp[c] + 5 co2[c] + fa3[c]	0.0111404		KAS3	10 nadph[c] + 14 h[c] + 5 malcoa[c] + ivcoa[c] -> 4 h2o[c] + 6 coa[c] + 10 nadp[c] + 5 co2[c] + fa3[c]	0.00661465		KAS3	10 nadph[c] + 14 h[c] + 5 malcoa[c] + ivcoa[c] -> 4 h2o[c] + 6 coa[c] + 10 nadp[c] + 5 co2[c] + fa3[c]	0.00221304		KAS3	10 nadph[c] + 14 h[c] + 5 malcoa[c] + ivcoa[c] -> 4 h2o[c] + 6 coa[c] + 10 nadp[c] + 5 co2[c] + fa3[c]	0.00571119		KAS3	10 nadph[c] + 14 h[c] + 5 malcoa[c] + ivcoa[c] -> 4 h2o[c] + 6 coa[c] + 10 nadp[c] + 5 co2[c] + fa3[c]	0.00137966
KAS4	10 nadph[c] + 14 h[c] + 2mbcoa[c] + 5 malcoa[c] -> 4 h2o[c] + 6 coa[c] + 10 nadp[c] + 5 co2[c] + fa4[c]	0.000574356		KAS4	10 nadph[c] + 14 h[c] + 2mbcoa[c] + 5 malcoa[c] -> 4 h2o[c] + 6 coa[c] + 10 nadp[c] + 5 co2[c] + fa4[c]	0.000672167		KAS4	10 nadph[c] + 14 h[c] + 2mbcoa[c] + 5 malcoa[c] -> 4 h2o[c] + 6 coa[c] + 10 nadp[c] + 5 co2[c] + fa4[c]	0.0003991		KAS4	10 nadph[c] + 14 h[c] + 2mbcoa[c] + 5 malcoa[c] -> 4 h2o[c] + 6 coa[c] + 10 nadp[c] + 5 co2[c] + fa4[c]	0.000133526		KAS4	10 nadph[c] + 14 h[c] + 2mbcoa[c] + 5 malcoa[c] -> 4 h2o[c] + 6 coa[c] + 10 nadp[c] + 5 co2[c] + fa4[c]	0.000344589		KAS4	10 nadph[c] + 14 h[c] + 2mbcoa[c] + 5 malcoa[c] -> 4 h2o[c] + 6 coa[c] + 10 nadp[c] + 5 co2[c] + fa4[c]	8.32431e-05
KAS7	13 nadph[c] + accoa[c] + 19 h[c] + 7 malcoa[c] -> 6 h2o[c] + 8 coa[c] + 13 nadp[c] + 7 co2[c] + hdcea[c]	0.000476965		KAS7	13 nadph[c] + accoa[c] + 19 h[c] + 7 malcoa[c] -> 6 h2o[c] + 8 coa[c] + 13 nadp[c] + 7 co2[c] + hdcea[c]	0.000558191		KAS7	13 nadph[c] + accoa[c] + 19 h[c] + 7 malcoa[c] -> 6 h2o[c] + 8 coa[c] + 13 nadp[c] + 7 co2[c] + hdcea[c]	0.000331427		KAS7	13 nadph[c] + accoa[c] + 19 h[c] + 7 malcoa[c] -> 6 h2o[c] + 8 coa[c] + 13 nadp[c] + 7 co2[c] + hdcea[c]	0.000110884		KAS7	13 nadph[c] + accoa[c] + 19 h[c] + 7 malcoa[c] -> 6 h2o[c] + 8 coa[c] + 13 nadp[c] + 7 co2[c] + hdcea[c]	0.000286159		KAS7	13 nadph[c] + accoa[c] + 19 h[c] + 7 malcoa[c] -> 6 h2o[c] + 8 coa[c] + 13 nadp[c] + 7 co2[c] + hdcea[c]	6.91279e-05
KAS8	14 nadph[c] + accoa[c] + 20 h[c] + 7 malcoa[c] -> 6 h2o[c] + 8 coa[c] + 14 nadp[c] + 7 co2[c] + hdca[c]	0.00532653		KAS8	14 nadph[c] + accoa[c] + 20 h[c] + 7 malcoa[c] -> 6 h2o[c] + 8 coa[c] + 14 nadp[c] + 7 co2[c] + hdca[c]	0.00623362		KAS8	14 nadph[c] + accoa[c] + 20 h[c] + 7 malcoa[c] -> 6 h2o[c] + 8 coa[c] + 14 nadp[c] + 7 co2[c] + hdca[c]	0.00370122		KAS8	14 nadph[c] + accoa[c] + 20 h[c] + 7 malcoa[c] -> 6 h2o[c] + 8 coa[c] + 14 nadp[c] + 7 co2[c] + hdca[c]	0.0012383		KAS8	14 nadph[c] + accoa[c] + 20 h[c] + 7 malcoa[c] -> 6 h2o[c] + 8 coa[c] + 14 nadp[c] + 7 co2[c] + hdca[c]	0.00319569		KAS8	14 nadph[c] + accoa[c] + 20 h[c] + 7 malcoa[c] -> 6 h2o[c] + 8 coa[c] + 14 nadp[c] + 7 co2[c] + hdca[c]	0.000771989
MACCOAT	accoa[c] + ppcoa[c] <=> coa[c] + 2maacoa[c]	0		MACCOAT	accoa[c] + ppcoa[c] <=> coa[c] + 2maacoa[c]	0		MACCOAT	accoa[c] + ppcoa[c] <=> coa[c] + 2maacoa[c]	0		MACCOAT	accoa[c] + ppcoa[c] <=> coa[c] + 2maacoa[c]	0		MACCOAT	accoa[c] + ppcoa[c] <=> coa[c] + 2maacoa[c]	0		MACCOAT	accoa[c] + ppcoa[c] <=> coa[c] + 2maacoa[c]	0
OIVD1	coa[c] + nad[c] + 4mop[c] <=> nadh[c] + co2[c] + ivcoa[c]	0.00951933		OIVD1	coa[c] + nad[c] + 4mop[c] <=> nadh[c] + co2[c] + ivcoa[c]	0.0111404		OIVD1	coa[c] + nad[c] + 4mop[c] <=> nadh[c] + co2[c] + ivcoa[c]	0.00661465		OIVD1	coa[c] + nad[c] + 4mop[c] <=> nadh[c] + co2[c] + ivcoa[c]	0.00221304		OIVD1	coa[c] + nad[c] + 4mop[c] <=> nadh[c] + co2[c] + ivcoa[c]	0.00571119		OIVD1	coa[c] + nad[c] + 4mop[c] <=> nadh[c] + co2[c] + ivcoa[c]	0.00137966
OIVD2	coa[c] + nad[c] + 3mob[c] -> nadh[c] + co2[c] + ibcoa[c]	0		OIVD2	coa[c] + nad[c] + 3mob[c] -> nadh[c] + co2[c] + ibcoa[c]	0		OIVD2	coa[c] + nad[c] + 3mob[c] -> nadh[c] + co2[c] + ibcoa[c]	0		OIVD2	coa[c] + nad[c] + 3mob[c] -> nadh[c] + co2[c] + ibcoa[c]	0		OIVD2	coa[c] + nad[c] + 3mob[c] -> nadh[c] + co2[c] + ibcoa[c]	0		OIVD2	coa[c] + nad[c] + 3mob[c] -> nadh[c] + co2[c] + ibcoa[c]	0
OIVD3	coa[c] + nad[c] + 3mop[c] -> nadh[c] + co2[c] + 2mbcoa[c]	0.00806595		OIVD3	coa[c] + nad[c] + 3mop[c] -> nadh[c] + co2[c] + 2mbcoa[c]	0.00943957		OIVD3	coa[c] + nad[c] + 3mop[c] -> nadh[c] + co2[c] + 2mbcoa[c]	0.00560475		OIVD3	coa[c] + nad[c] + 3mop[c] -> nadh[c] + co2[c] + 2mbcoa[c]	0.00187516		OIVD3	coa[c] + nad[c] + 3mop[c] -> nadh[c] + co2[c] + 2mbcoa[c]	0.00483923		OIVD3	coa[c] + nad[c] + 3mop[c] -> nadh[c] + co2[c] + 2mbcoa[c]	0.00116902
ACACT1r	2 accoa[c] <=> coa[c] + aacoa[c]	0		ACACT1r	2 accoa[c] <=> coa[c] + aacoa[c]	0		ACACT1r	2 accoa[c] <=> coa[c] + aacoa[c]	0		ACACT1r	2 accoa[c] <=> coa[c] + aacoa[c]	0		ACACT1r	2 accoa[c] <=> coa[c] + aacoa[c]	0		ACACT1r	2 accoa[c] <=> coa[c] + aacoa[c]	0
ACACT2r	accoa[c] + btcoa[c] <=> coa[c] + 3ohcoa[c]	0		ACACT2r	accoa[c] + btcoa[c] <=> coa[c] + 3ohcoa[c]	0		ACACT2r	accoa[c] + btcoa[c] <=> coa[c] + 3ohcoa[c]	0		ACACT2r	accoa[c] + btcoa[c] <=> coa[c] + 3ohcoa[c]	0		ACACT2r	accoa[c] + btcoa[c] <=> coa[c] + 3ohcoa[c]	0		ACACT2r	accoa[c] + btcoa[c] <=> coa[c] + 3ohcoa[c]	0
ACCOAC	atp[c] + accoa[c] + hco3[c] -> pi[c] + h[c] + adp[c] + malcoa[c]	0.148054		ACCOAC	atp[c] + accoa[c] + hco3[c] -> pi[c] + h[c] + adp[c] + malcoa[c]	0.173267		ACCOAC	atp[c] + accoa[c] + hco3[c] -> pi[c] + h[c] + adp[c] + malcoa[c]	0.102878		ACCOAC	atp[c] + accoa[c] + hco3[c] -> pi[c] + h[c] + adp[c] + malcoa[c]	0.0344194		ACCOAC	atp[c] + accoa[c] + hco3[c] -> pi[c] + h[c] + adp[c] + malcoa[c]	0.0888261		ACCOAC	atp[c] + accoa[c] + hco3[c] -> pi[c] + h[c] + adp[c] + malcoa[c]	0.0214579
ACOATA	accoa[c] + ACP[c] <=> coa[c] + acACP[c]	0		ACOATA	accoa[c] + ACP[c] <=> coa[c] + acACP[c]	0		ACOATA	accoa[c] + ACP[c] <=> coa[c] + acACP[c]	0		ACOATA	accoa[c] + ACP[c] <=> coa[c] + acACP[c]	0		ACOATA	accoa[c] + ACP[c] <=> coa[c] + acACP[c]	0		ACOATA	accoa[c] + ACP[c] <=> coa[c] + acACP[c]	0
ACPS1	coa[c] + apoACP[c] <=> ACP[c] + pap[c]	0		ACPS1	coa[c] + apoACP[c] <=> ACP[c] + pap[c]	0		ACPS1	coa[c] + apoACP[c] <=> ACP[c] + pap[c]	0		ACPS1	coa[c] + apoACP[c] <=> ACP[c] + pap[c]	0		ACPS1	coa[c] + apoACP[c] <=> ACP[c] + pap[c]	0		ACPS1	coa[c] + apoACP[c] <=> ACP[c] + pap[c]	0
DASYN120	ctp[c] + pa120[c] <=> ppi[c] + cdpdddecg[c]	0		DASYN120	ctp[c] + pa120[c] <=> ppi[c] + cdpdddecg[c]	0		DASYN120	ctp[c] + pa120[c] <=> ppi[c] + cdpdddecg[c]	0		DASYN120	ctp[c] + pa120[c] <=> ppi[c] + cdpdddecg[c]	0		DASYN120	ctp[c] + pa120[c] <=> ppi[c] + cdpdddecg[c]	0		DASYN120	ctp[c] + pa120[c] <=> ppi[c] + cdpdddecg[c]	0
DASYN140	ctp[c] + pa140[c] <=> ppi[c] + cdpdtdecg[c]	0		DASYN140	ctp[c] + pa140[c] <=> ppi[c] + cdpdtdecg[c]	0		DASYN140	ctp[c] + pa140[c] <=> ppi[c] + cdpdtdecg[c]	0		DASYN140	ctp[c] + pa140[c] <=> ppi[c] + cdpdtdecg[c]	0		DASYN140	ctp[c] + pa140[c] <=> ppi[c] + cdpdtdecg[c]	0		DASYN140	ctp[c] + pa140[c] <=> ppi[c] + cdpdtdecg[c]	0
DASYN141	ctp[c] + pa141[c] <=> ppi[c] + cdpdtdec7eg[c]	0		DASYN141	ctp[c] + pa141[c] <=> ppi[c] + cdpdtdec7eg[c]	0		DASYN141	ctp[c] + pa141[c] <=> ppi[c] + cdpdtdec7eg[c]	0		DASYN141	ctp[c] + pa141[c] <=> ppi[c] + cdpdtdec7eg[c]	0		DASYN141	ctp[c] + pa141[c] <=> ppi[c] + cdpdtdec7eg[c]	0		DASYN141	ctp[c] + pa141[c] <=> ppi[c] + cdpdtdec7eg[c]	0
DASYN160	ctp[c] + pa160[c] <=> ppi[c] + cdpdhdecg[c]	0		DASYN160	ctp[c] + pa160[c] <=> ppi[c] + cdpdhdecg[c]	0		DASYN160	ctp[c] + pa160[c] <=> ppi[c] + cdpdhdecg[c]	0		DASYN160	ctp[c] + pa160[c] <=> ppi[c] + cdpdhdecg[c]	0		DASYN160	ctp[c] + pa160[c] <=> ppi[c] + cdpdhdecg[c]	0		DASYN160	ctp[c] + pa160[c] <=> ppi[c] + cdpdhdecg[c]	0
DASYN161	ctp[c] + pa161[c] <=> ppi[c] + cdpdhdec9eg[c]	0		DASYN161	ctp[c] + pa161[c] <=> ppi[c] + cdpdhdec9eg[c]	0		DASYN161	ctp[c] + pa161[c] <=> ppi[c] + cdpdhdec9eg[c]	0		DASYN161	ctp[c] + pa161[c] <=> ppi[c] + cdpdhdec9eg[c]	0		DASYN161	ctp[c] + pa161[c] <=> ppi[c] + cdpdhdec9eg[c]	0		DASYN161	ctp[c] + pa161[c] <=> ppi[c] + cdpdhdec9eg[c]	0
DASYN180	ctp[c] + pa180[c] <=> ppi[c] + cdpdodecg[c]	0		DASYN180	ctp[c] + pa180[c] <=> ppi[c] + cdpdodecg[c]	0		DASYN180	ctp[c] + pa180[c] <=> ppi[c] + cdpdodecg[c]	0		DASYN180	ctp[c] + pa180[c] <=> ppi[c] + cdpdodecg[c]	0		DASYN180	ctp[c] + pa180[c] <=> ppi[c] + cdpdodecg[c]	0		DASYN180	ctp[c] + pa180[c] <=> ppi[c] + cdpdodecg[c]	0
DASYN181	ctp[c] + pa181[c] <=> ppi[c] + cdpdodec11eg[c]	0		DASYN181	ctp[c] + pa181[c] <=> ppi[c] + cdpdodec11eg[c]	0		DASYN181	ctp[c] + pa181[c] <=> ppi[c] + cdpdodec11eg[c]	0		DASYN181	ctp[c] + pa181[c] <=> ppi[c] + cdpdodec11eg[c]	0		DASYN181	ctp[c] + pa181[c] <=> ppi[c] + cdpdodec11eg[c]	0		DASYN181	ctp[c] + pa181[c] <=> ppi[c] + cdpdodec11eg[c]	0
DMATT	ipdp[c] + dmpp[c] -> ppi[c] + grdp[c]	9.27465e-05		DMATT	ipdp[c] + dmpp[c] -> ppi[c] + grdp[c]	0.000108541		DMATT	ipdp[c] + dmpp[c] -> ppi[c] + grdp[c]	6.44463e-05		DMATT	ipdp[c] + dmpp[c] -> ppi[c] + grdp[c]	2.15616e-05		DMATT	ipdp[c] + dmpp[c] -> ppi[c] + grdp[c]	5.5644e-05		DMATT	ipdp[c] + dmpp[c] -> ppi[c] + grdp[c]	1.3442e-05
FRTT	frdp[c] + ipdp[c] -> ppi[c] + ggdp[c]	0		FRTT	frdp[c] + ipdp[c] -> ppi[c] + ggdp[c]	0		FRTT	frdp[c] + ipdp[c] -> ppi[c] + ggdp[c]	0		FRTT	frdp[c] + ipdp[c] -> ppi[c] + ggdp[c]	0		FRTT	frdp[c] + ipdp[c] -> ppi[c] + ggdp[c]	0		FRTT	frdp[c] + ipdp[c] -> ppi[c] + ggdp[c]	0
OCTDPS	frdp[c] + 4 ipdp[c] -> 4 ppi[c] + octdp[c]	9.27465e-05		OCTDPS	frdp[c] + 4 ipdp[c] -> 4 ppi[c] + octdp[c]	0.000108541		OCTDPS	frdp[c] + 4 ipdp[c] -> 4 ppi[c] + octdp[c]	6.44463e-05		OCTDPS	frdp[c] + 4 ipdp[c] -> 4 ppi[c] + octdp[c]	2.15616e-05		OCTDPS	frdp[c] + 4 ipdp[c] -> 4 ppi[c] + octdp[c]	5.5644e-05		OCTDPS	frdp[c] + 4 ipdp[c] -> 4 ppi[c] + octdp[c]	1.3442e-05
GRTT	ipdp[c] + grdp[c] -> ppi[c] + frdp[c]	9.27465e-05		GRTT	ipdp[c] + grdp[c] -> ppi[c] + frdp[c]	0.000108541		GRTT	ipdp[c] + grdp[c] -> ppi[c] + frdp[c]	6.44463e-05		GRTT	ipdp[c] + grdp[c] -> ppi[c] + frdp[c]	2.15616e-05		GRTT	ipdp[c] + grdp[c] -> ppi[c] + frdp[c]	5.5644e-05		GRTT	ipdp[c] + grdp[c] -> ppi[c] + frdp[c]	1.3442e-05
G3PAT120	ddcaACP[c] + glyc3p[c] -> 1ddecg3p[c] + ACP[c]	0		G3PAT120	ddcaACP[c] + glyc3p[c] -> 1ddecg3p[c] + ACP[c]	0		G3PAT120	ddcaACP[c] + glyc3p[c] -> 1ddecg3p[c] + ACP[c]	0		G3PAT120	ddcaACP[c] + glyc3p[c] -> 1ddecg3p[c] + ACP[c]	0		G3PAT120	ddcaACP[c] + glyc3p[c] -> 1ddecg3p[c] + ACP[c]	0		G3PAT120	ddcaACP[c] + glyc3p[c] -> 1ddecg3p[c] + ACP[c]	0
G3PAT140	myrsACP[c] + glyc3p[c] -> ACP[c] + 1tdecg3p[c]	0		G3PAT140	myrsACP[c] + glyc3p[c] -> ACP[c] + 1tdecg3p[c]	0		G3PAT140	myrsACP[c] + glyc3p[c] -> ACP[c] + 1tdecg3p[c]	0		G3PAT140	myrsACP[c] + glyc3p[c] -> ACP[c] + 1tdecg3p[c]	0		G3PAT140	myrsACP[c] + glyc3p[c] -> ACP[c] + 1tdecg3p[c]	0		G3PAT140	myrsACP[c] + glyc3p[c] -> ACP[c] + 1tdecg3p[c]	0
G3PAT141	glyc3p[c] + tdeACP[c] -> ACP[c] + 1tdec7eg3p[c]	0		G3PAT141	glyc3p[c] + tdeACP[c] -> ACP[c] + 1tdec7eg3p[c]	0		G3PAT141	glyc3p[c] + tdeACP[c] -> ACP[c] + 1tdec7eg3p[c]	0		G3PAT141	glyc3p[c] + tdeACP[c] -> ACP[c] + 1tdec7eg3p[c]	0		G3PAT141	glyc3p[c] + tdeACP[c] -> ACP[c] + 1tdec7eg3p[c]	0		G3PAT141	glyc3p[c] + tdeACP[c] -> ACP[c] + 1tdec7eg3p[c]	0
G3PAT160	palmACP[c] + glyc3p[c] -> ACP[c] + 1hdecg3p[c]	0		G3PAT160	palmACP[c] + glyc3p[c] -> ACP[c] + 1hdecg3p[c]	0		G3PAT160	palmACP[c] + glyc3p[c] -> ACP[c] + 1hdecg3p[c]	0		G3PAT160	palmACP[c] + glyc3p[c] -> ACP[c] + 1hdecg3p[c]	0		G3PAT160	palmACP[c] + glyc3p[c] -> ACP[c] + 1hdecg3p[c]	0		G3PAT160	palmACP[c] + glyc3p[c] -> ACP[c] + 1hdecg3p[c]	0
G3PAT161	hdeACP[c] + glyc3p[c] -> ACP[c] + 1hdec9eg3p[c]	0		G3PAT161	hdeACP[c] + glyc3p[c] -> ACP[c] + 1hdec9eg3p[c]	0		G3PAT161	hdeACP[c] + glyc3p[c] -> ACP[c] + 1hdec9eg3p[c]	0		G3PAT161	hdeACP[c] + glyc3p[c] -> ACP[c] + 1hdec9eg3p[c]	0		G3PAT161	hdeACP[c] + glyc3p[c] -> ACP[c] + 1hdec9eg3p[c]	0		G3PAT161	hdeACP[c] + glyc3p[c] -> ACP[c] + 1hdec9eg3p[c]	0
G3PAT181	octeACP[c] + glyc3p[c] -> ACP[c] + 1odec11eg3p[c]	0		G3PAT181	octeACP[c] + glyc3p[c] -> ACP[c] + 1odec11eg3p[c]	0		G3PAT181	octeACP[c] + glyc3p[c] -> ACP[c] + 1odec11eg3p[c]	0		G3PAT181	octeACP[c] + glyc3p[c] -> ACP[c] + 1odec11eg3p[c]	0		G3PAT181	octeACP[c] + glyc3p[c] -> ACP[c] + 1odec11eg3p[c]	0		G3PAT181	octeACP[c] + glyc3p[c] -> ACP[c] + 1odec11eg3p[c]	0
MCOATA	ACP[c] + malcoa[c] <=> coa[c] + malACP[c]	0		MCOATA	ACP[c] + malcoa[c] <=> coa[c] + malACP[c]	0		MCOATA	ACP[c] + malcoa[c] <=> coa[c] + malACP[c]	0		MCOATA	ACP[c] + malcoa[c] <=> coa[c] + malACP[c]	0		MCOATA	ACP[c] + malcoa[c] <=> coa[c] + malACP[c]	0		MCOATA	ACP[c] + malcoa[c] <=> coa[c] + malACP[c]	0
PGSA120	glyc3p[c] + cdpdddecg[c] <=> cmp[c] + pgp120[c]	0		PGSA120	glyc3p[c] + cdpdddecg[c] <=> cmp[c] + pgp120[c]	0		PGSA120	glyc3p[c] + cdpdddecg[c] <=> cmp[c] + pgp120[c]	0		PGSA120	glyc3p[c] + cdpdddecg[c] <=> cmp[c] + pgp120[c]	0		PGSA120	glyc3p[c] + cdpdddecg[c] <=> cmp[c] + pgp120[c]	0		PGSA120	glyc3p[c] + cdpdddecg[c] <=> cmp[c] + pgp120[c]	0
PGSA140	glyc3p[c] + cdpdtdecg[c] <=> cmp[c] + pgp140[c]	0		PGSA140	glyc3p[c] + cdpdtdecg[c] <=> cmp[c] + pgp140[c]	0		PGSA140	glyc3p[c] + cdpdtdecg[c] <=> cmp[c] + pgp140[c]	0		PGSA140	glyc3p[c] + cdpdtdecg[c] <=> cmp[c] + pgp140[c]	0		PGSA140	glyc3p[c] + cdpdtdecg[c] <=> cmp[c] + pgp140[c]	0		PGSA140	glyc3p[c] + cdpdtdecg[c] <=> cmp[c] + pgp140[c]	0
PGSA141	glyc3p[c] + cdpdtdec7eg[c] <=> cmp[c] + pgp141[c]	0		PGSA141	glyc3p[c] + cdpdtdec7eg[c] <=> cmp[c] + pgp141[c]	0		PGSA141	glyc3p[c] + cdpdtdec7eg[c] <=> cmp[c] + pgp141[c]	0		PGSA141	glyc3p[c] + cdpdtdec7eg[c] <=> cmp[c] + pgp141[c]	0		PGSA141	glyc3p[c] + cdpdtdec7eg[c] <=> cmp[c] + pgp141[c]	0		PGSA141	glyc3p[c] + cdpdtdec7eg[c] <=> cmp[c] + pgp141[c]	0
PGSA160	glyc3p[c] + cdpdhdecg[c] <=> cmp[c] + pgp160[c]	0		PGSA160	glyc3p[c] + cdpdhdecg[c] <=> cmp[c] + pgp160[c]	0		PGSA160	glyc3p[c] + cdpdhdecg[c] <=> cmp[c] + pgp160[c]	0		PGSA160	glyc3p[c] + cdpdhdecg[c] <=> cmp[c] + pgp160[c]	0		PGSA160	glyc3p[c] + cdpdhdecg[c] <=> cmp[c] + pgp160[c]	0		PGSA160	glyc3p[c] + cdpdhdecg[c] <=> cmp[c] + pgp160[c]	0
PGSA161	glyc3p[c] + cdpdhdec9eg[c] <=> cmp[c] + pgp161[c]	0		PGSA161	glyc3p[c] + cdpdhdec9eg[c] <=> cmp[c] + pgp161[c]	0		PGSA161	glyc3p[c] + cdpdhdec9eg[c] <=> cmp[c] + pgp161[c]	0		PGSA161	glyc3p[c] + cdpdhdec9eg[c] <=> cmp[c] + pgp161[c]	0		PGSA161	glyc3p[c] + cdpdhdec9eg[c] <=> cmp[c] + pgp161[c]	0		PGSA161	glyc3p[c] + cdpdhdec9eg[c] <=> cmp[c] + pgp161[c]	0
PGSA180	glyc3p[c] + cdpdodecg[c] <=> cmp[c] + pgp180[c]	0		PGSA180	glyc3p[c] + cdpdodecg[c] <=> cmp[c] + pgp180[c]	0		PGSA180	glyc3p[c] + cdpdodecg[c] <=> cmp[c] + pgp180[c]	0		PGSA180	glyc3p[c] + cdpdodecg[c] <=> cmp[c] + pgp180[c]	0		PGSA180	glyc3p[c] + cdpdodecg[c] <=> cmp[c] + pgp180[c]	0		PGSA180	glyc3p[c] + cdpdodecg[c] <=> cmp[c] + pgp180[c]	0
PGSA181	glyc3p[c] + cdpdodec11eg[c] <=> cmp[c] + pgp181[c]	0		PGSA181	glyc3p[c] + cdpdodec11eg[c] <=> cmp[c] + pgp181[c]	0		PGSA181	glyc3p[c] + cdpdodec11eg[c] <=> cmp[c] + pgp181[c]	0		PGSA181	glyc3p[c] + cdpdodec11eg[c] <=> cmp[c] + pgp181[c]	0		PGSA181	glyc3p[c] + cdpdodec11eg[c] <=> cmp[c] + pgp181[c]	0		PGSA181	glyc3p[c] + cdpdodec11eg[c] <=> cmp[c] + pgp181[c]	0
ADD	h2o[c] + h[c] + ade[c] -> nh4[c] + hxan[c]	0		ADD	h2o[c] + h[c] + ade[c] -> nh4[c] + hxan[c]	0		ADD	h2o[c] + h[c] + ade[c] -> nh4[c] + hxan[c]	0		ADD	h2o[c] + h[c] + ade[c] -> nh4[c] + hxan[c]	0		ADD	h2o[c] + h[c] + ade[c] -> nh4[c] + hxan[c]	0		ADD	h2o[c] + h[c] + ade[c] -> nh4[c] + hxan[c]	0
ADK1	atp[c] + amp[c] <=> 2 adp[c]	0.237008		ADK1	atp[c] + amp[c] <=> 2 adp[c]	0.27737		ADK1	atp[c] + amp[c] <=> 2 adp[c]	0.164689		ADK1	atp[c] + amp[c] <=> 2 adp[c]	0.0550994		ADK1	atp[c] + amp[c] <=> 2 adp[c]	0.142195		ADK1	atp[c] + amp[c] <=> 2 adp[c]	0.125587
ADK2	amp[c] + h[c] + pppi[c] <=> ppi[c] + adp[c]	0.000115933		ADK2	amp[c] + h[c] + pppi[c] <=> ppi[c] + adp[c]	0.000135676		ADK2	amp[c] + h[c] + pppi[c] <=> ppi[c] + adp[c]	8.05579e-05		ADK2	amp[c] + h[c] + pppi[c] <=> ppi[c] + adp[c]	2.6952e-05		ADK2	amp[c] + h[c] + pppi[c] <=> ppi[c] + adp[c]	6.9555e-05		ADK2	amp[c] + h[c] + pppi[c] <=> ppi[c] + adp[c]	1.68025e-05
ADNCYC	atp[c] -> ppi[c] + camp[c]	0		ADNCYC	atp[c] -> ppi[c] + camp[c]	0		ADNCYC	atp[c] -> ppi[c] + camp[c]	0		ADNCYC	atp[c] -> ppi[c] + camp[c]	0		ADNCYC	atp[c] -> ppi[c] + camp[c]	0		ADNCYC	atp[c] -> ppi[c] + camp[c]	0
ADPRDP	h2o[c] + adprib[c] -> amp[c] + r5p[c]	0		ADPRDP	h2o[c] + adprib[c] -> amp[c] + r5p[c]	0		ADPRDP	h2o[c] + adprib[c] -> amp[c] + r5p[c]	0		ADPRDP	h2o[c] + adprib[c] -> amp[c] + r5p[c]	0		ADPRDP	h2o[c] + adprib[c] -> amp[c] + r5p[c]	0		ADPRDP	h2o[c] + adprib[c] -> amp[c] + r5p[c]	0
ADSL1	dcamp[c] <=> amp[c] + fum[c]	0.0304469		ADSL1	dcamp[c] <=> amp[c] + fum[c]	0.0356319		ADSL1	dcamp[c] <=> amp[c] + fum[c]	0.0211565		ADSL1	dcamp[c] <=> amp[c] + fum[c]	0.00707825		ADSL1	dcamp[c] <=> amp[c] + fum[c]	0.0182668		ADSL1	dcamp[c] <=> amp[c] + fum[c]	0.00441275
ADSL2	25aics[c] <=> fum[c] + aicar[c]	0.028905		ADSL2	25aics[c] <=> fum[c] + aicar[c]	0.0338274		ADSL2	25aics[c] <=> fum[c] + aicar[c]	0.0200851		ADSL2	25aics[c] <=> fum[c] + aicar[c]	0.00671979		ADSL2	25aics[c] <=> fum[c] + aicar[c]	0.0173418		ADSL2	25aics[c] <=> fum[c] + aicar[c]	0.00418928
ADSS	gtp[c] + asp-L[c] + imp[c] -> gdp[c] + pi[c] + 2 h[c] + dcamp[c]	0.0304469		ADSS	gtp[c] + asp-L[c] + imp[c] -> gdp[c] + pi[c] + 2 h[c] + dcamp[c]	0.0356319		ADSS	gtp[c] + asp-L[c] + imp[c] -> gdp[c] + pi[c] + 2 h[c] + dcamp[c]	0.0211565		ADSS	gtp[c] + asp-L[c] + imp[c] -> gdp[c] + pi[c] + 2 h[c] + dcamp[c]	0.00707825		ADSS	gtp[c] + asp-L[c] + imp[c] -> gdp[c] + pi[c] + 2 h[c] + dcamp[c]	0.0182668		ADSS	gtp[c] + asp-L[c] + imp[c] -> gdp[c] + pi[c] + 2 h[c] + dcamp[c]	0.00441275
AICART	10fthf[c] + aicar[c] <=> thf[c] + fprica[c]	0.0372869		AICART	10fthf[c] + aicar[c] <=> thf[c] + fprica[c]	0.0436368		AICART	10fthf[c] + aicar[c] <=> thf[c] + fprica[c]	0.0259094		AICART	10fthf[c] + aicar[c] <=> thf[c] + fprica[c]	0.00866842		AICART	10fthf[c] + aicar[c] <=> thf[c] + fprica[c]	0.0223706		AICART	10fthf[c] + aicar[c] <=> thf[c] + fprica[c]	0.0054041
AIRCr	co2[c] + air[c] <=> h[c] + 5aizc[c]	0.028905		AIRCr	co2[c] + air[c] <=> h[c] + 5aizc[c]	0.0338274		AIRCr	co2[c] + air[c] <=> h[c] + 5aizc[c]	0.0200851		AIRCr	co2[c] + air[c] <=> h[c] + 5aizc[c]	0.00671979		AIRCr	co2[c] + air[c] <=> h[c] + 5aizc[c]	0.0173418		AIRCr	co2[c] + air[c] <=> h[c] + 5aizc[c]	0.00418928
ASPCT	asp-L[c] + cbp[c] -> pi[c] + 2 h[c] + cbasp[c]	0.0647718		ASPCT	asp-L[c] + cbp[c] -> pi[c] + 2 h[c] + cbasp[c]	0.0758023		ASPCT	asp-L[c] + cbp[c] -> pi[c] + 2 h[c] + cbasp[c]	0.0450077		ASPCT	asp-L[c] + cbp[c] -> pi[c] + 2 h[c] + cbasp[c]	0.0150581		ASPCT	asp-L[c] + cbp[c] -> pi[c] + 2 h[c] + cbasp[c]	0.0388604		ASPCT	asp-L[c] + cbp[c] -> pi[c] + 2 h[c] + cbasp[c]	0.00938757
CSND	h2o[c] + h[c] + csn[c] -> nh4[c] + ura[c]	0		CSND	h2o[c] + h[c] + csn[c] -> nh4[c] + ura[c]	0		CSND	h2o[c] + h[c] + csn[c] -> nh4[c] + ura[c]	0		CSND	h2o[c] + h[c] + csn[c] -> nh4[c] + ura[c]	0		CSND	h2o[c] + h[c] + csn[c] -> nh4[c] + ura[c]	0		CSND	h2o[c] + h[c] + csn[c] -> nh4[c] + ura[c]	0
CYTD	h2o[c] + h[c] + cytd[c] -> nh4[c] + uri[c]	0		CYTD	h2o[c] + h[c] + cytd[c] -> nh4[c] + uri[c]	0		CYTD	h2o[c] + h[c] + cytd[c] -> nh4[c] + uri[c]	0		CYTD	h2o[c] + h[c] + cytd[c] -> nh4[c] + uri[c]	0		CYTD	h2o[c] + h[c] + cytd[c] -> nh4[c] + uri[c]	0		CYTD	h2o[c] + h[c] + cytd[c] -> nh4[c] + uri[c]	0
CYTK1	atp[c] + cmp[c] <=> cdp[c] + adp[c]	0.0195723		CYTK1	atp[c] + cmp[c] <=> cdp[c] + adp[c]	0.0229055		CYTK1	atp[c] + cmp[c] <=> cdp[c] + adp[c]	0.0136001		CYTK1	atp[c] + cmp[c] <=> cdp[c] + adp[c]	0.00455016		CYTK1	atp[c] + cmp[c] <=> cdp[c] + adp[c]	0.0117426		CYTK1	atp[c] + cmp[c] <=> cdp[c] + adp[c]	0.00283668
CYTK2	atp[c] + dcmp[c] <=> adp[c] + dcdp[c]	0		CYTK2	atp[c] + dcmp[c] <=> adp[c] + dcdp[c]	0		CYTK2	atp[c] + dcmp[c] <=> adp[c] + dcdp[c]	0		CYTK2	atp[c] + dcmp[c] <=> adp[c] + dcdp[c]	0		CYTK2	atp[c] + dcmp[c] <=> adp[c] + dcdp[c]	0		CYTK2	atp[c] + dcmp[c] <=> adp[c] + dcdp[c]	0
DADK	atp[c] + damp[c] <=> adp[c] + dadp[c]	0		DADK	atp[c] + damp[c] <=> adp[c] + dadp[c]	0		DADK	atp[c] + damp[c] <=> adp[c] + dadp[c]	0		DADK	atp[c] + damp[c] <=> adp[c] + dadp[c]	0		DADK	atp[c] + damp[c] <=> adp[c] + dadp[c]	0		DADK	atp[c] + damp[c] <=> adp[c] + dadp[c]	0
DCMPDA3ir	h2o[c] + h[c] + dcmp[c] -> nh4[c] + dump[c]	0		DCMPDA3ir	h2o[c] + h[c] + dcmp[c] -> nh4[c] + dump[c]	0		DCMPDA3ir	h2o[c] + h[c] + dcmp[c] -> nh4[c] + dump[c]	0		DCMPDA3ir	h2o[c] + h[c] + dcmp[c] -> nh4[c] + dump[c]	0		DCMPDA3ir	h2o[c] + h[c] + dcmp[c] -> nh4[c] + dump[c]	0		DCMPDA3ir	h2o[c] + h[c] + dcmp[c] -> nh4[c] + dump[c]	0
DCYTD	h2o[c] + h[c] + dcyt[c] -> nh4[c] + duri[c]	0		DCYTD	h2o[c] + h[c] + dcyt[c] -> nh4[c] + duri[c]	0		DCYTD	h2o[c] + h[c] + dcyt[c] -> nh4[c] + duri[c]	0		DCYTD	h2o[c] + h[c] + dcyt[c] -> nh4[c] + duri[c]	0		DCYTD	h2o[c] + h[c] + dcyt[c] -> nh4[c] + duri[c]	0		DCYTD	h2o[c] + h[c] + dcyt[c] -> nh4[c] + duri[c]	0
DHORD5	mqn8[c] + dhor-S[c] -> orot[c] + mql8[c]	0.0647718		DHORD5	mqn8[c] + dhor-S[c] -> orot[c] + mql8[c]	0.0758023		DHORD5	mqn8[c] + dhor-S[c] -> orot[c] + mql8[c]	0.0450077		DHORD5	mqn8[c] + dhor-S[c] -> orot[c] + mql8[c]	0.0150581		DHORD5	mqn8[c] + dhor-S[c] -> orot[c] + mql8[c]	0.0388604		DHORD5	mqn8[c] + dhor-S[c] -> orot[c] + mql8[c]	0.00938757
DHORTS	h2o[c] + dhor-S[c] <=> h[c] + cbasp[c]	-0.0647718		DHORTS	h2o[c] + dhor-S[c] <=> h[c] + cbasp[c]	-0.0758023		DHORTS	h2o[c] + dhor-S[c] <=> h[c] + cbasp[c]	-0.0450077		DHORTS	h2o[c] + dhor-S[c] <=> h[c] + cbasp[c]	-0.0150581		DHORTS	h2o[c] + dhor-S[c] <=> h[c] + cbasp[c]	-0.0388604		DHORTS	h2o[c] + dhor-S[c] <=> h[c] + cbasp[c]	-0.00938757
DTMPK	atp[c] + dtmp[c] <=> adp[c] + dtdp[c]	0.00230707		DTMPK	atp[c] + dtmp[c] <=> adp[c] + dtdp[c]	0.00269996		DTMPK	atp[c] + dtmp[c] <=> adp[c] + dtdp[c]	0.0016031		DTMPK	atp[c] + dtmp[c] <=> adp[c] + dtdp[c]	0.000536345		DTMPK	atp[c] + dtmp[c] <=> adp[c] + dtdp[c]	0.00138414		DTMPK	atp[c] + dtmp[c] <=> adp[c] + dtdp[c]	0.00033437
DURIPP	pi[c] + h[c] + duri[c] <=> 2dr1p[c] + ura[c]	0		DURIPP	pi[c] + h[c] + duri[c] <=> 2dr1p[c] + ura[c]	0		DURIPP	pi[c] + h[c] + duri[c] <=> 2dr1p[c] + ura[c]	0		DURIPP	pi[c] + h[c] + duri[c] <=> 2dr1p[c] + ura[c]	0		DURIPP	pi[c] + h[c] + duri[c] <=> 2dr1p[c] + ura[c]	0		DURIPP	pi[c] + h[c] + duri[c] <=> 2dr1p[c] + ura[c]	0
DUTPDP	h2o[c] + dutp[c] -> ppi[c] + dump[c]	0		DUTPDP	h2o[c] + dutp[c] -> ppi[c] + dump[c]	0		DUTPDP	h2o[c] + dutp[c] -> ppi[c] + dump[c]	0		DUTPDP	h2o[c] + dutp[c] -> ppi[c] + dump[c]	0		DUTPDP	h2o[c] + dutp[c] -> ppi[c] + dump[c]	0		DUTPDP	h2o[c] + dutp[c] -> ppi[c] + dump[c]	0
G1PTT	dttp[c] + g1p[c] -> ppi[c] + dtdpglu[c]	0		G1PTT	dttp[c] + g1p[c] -> ppi[c] + dtdpglu[c]	0		G1PTT	dttp[c] + g1p[c] -> ppi[c] + dtdpglu[c]	0		G1PTT	dttp[c] + g1p[c] -> ppi[c] + dtdpglu[c]	0		G1PTT	dttp[c] + g1p[c] -> ppi[c] + dtdpglu[c]	0		G1PTT	dttp[c] + g1p[c] -> ppi[c] + dtdpglu[c]	0
GARFT	10fthf[c] + gar[c] <=> h[c] + thf[c] + fgam[c]	0.028905		GARFT	10fthf[c] + gar[c] <=> h[c] + thf[c] + fgam[c]	0.0338274		GARFT	10fthf[c] + gar[c] <=> h[c] + thf[c] + fgam[c]	0.0200851		GARFT	10fthf[c] + gar[c] <=> h[c] + thf[c] + fgam[c]	0.00671979		GARFT	10fthf[c] + gar[c] <=> h[c] + thf[c] + fgam[c]	0.0173418		GARFT	10fthf[c] + gar[c] <=> h[c] + thf[c] + fgam[c]	0.00418928
GLUPRT	h2o[c] + gln-L[c] + prpp[c] -> glu-L[c] + ppi[c] + pram[c]	0.028905		GLUPRT	h2o[c] + gln-L[c] + prpp[c] -> glu-L[c] + ppi[c] + pram[c]	0.0338274		GLUPRT	h2o[c] + gln-L[c] + prpp[c] -> glu-L[c] + ppi[c] + pram[c]	0.0200851		GLUPRT	h2o[c] + gln-L[c] + prpp[c] -> glu-L[c] + ppi[c] + pram[c]	0.00671979		GLUPRT	h2o[c] + gln-L[c] + prpp[c] -> glu-L[c] + ppi[c] + pram[c]	0.0173418		GLUPRT	h2o[c] + gln-L[c] + prpp[c] -> glu-L[c] + ppi[c] + pram[c]	0.00418928
GMPS2	h2o[c] + atp[c] + gln-L[c] + xmp[c] -> glu-L[c] + amp[c] + gmp[c] + ppi[c] + h[c]	0.00684005		GMPS2	h2o[c] + atp[c] + gln-L[c] + xmp[c] -> glu-L[c] + amp[c] + gmp[c] + ppi[c] + h[c]	0.0080049		GMPS2	h2o[c] + atp[c] + gln-L[c] + xmp[c] -> glu-L[c] + amp[c] + gmp[c] + ppi[c] + h[c]	0.00475292		GMPS2	h2o[c] + atp[c] + gln-L[c] + xmp[c] -> glu-L[c] + amp[c] + gmp[c] + ppi[c] + h[c]	0.00159017		GMPS2	h2o[c] + atp[c] + gln-L[c] + xmp[c] -> glu-L[c] + amp[c] + gmp[c] + ppi[c] + h[c]	0.00410374		GMPS2	h2o[c] + atp[c] + gln-L[c] + xmp[c] -> glu-L[c] + amp[c] + gmp[c] + ppi[c] + h[c]	0.000991349
GUAPRT	prpp[c] + gua[c] -> gmp[c] + ppi[c]	0		GUAPRT	prpp[c] + gua[c] -> gmp[c] + ppi[c]	0		GUAPRT	prpp[c] + gua[c] -> gmp[c] + ppi[c]	0		GUAPRT	prpp[c] + gua[c] -> gmp[c] + ppi[c]	0		GUAPRT	prpp[c] + gua[c] -> gmp[c] + ppi[c]	0		GUAPRT	prpp[c] + gua[c] -> gmp[c] + ppi[c]	0
HXAND	h2o[c] + nad[c] + hxan[c] <=> h[c] + nadh[c] + xan[c]	0		HXAND	h2o[c] + nad[c] + hxan[c] <=> h[c] + nadh[c] + xan[c]	0		HXAND	h2o[c] + nad[c] + hxan[c] <=> h[c] + nadh[c] + xan[c]	0		HXAND	h2o[c] + nad[c] + hxan[c] <=> h[c] + nadh[c] + xan[c]	0		HXAND	h2o[c] + nad[c] + hxan[c] <=> h[c] + nadh[c] + xan[c]	0		HXAND	h2o[c] + nad[c] + hxan[c] <=> h[c] + nadh[c] + xan[c]	0
HXPRT	prpp[c] + hxan[c] -> ppi[c] + imp[c]	0		HXPRT	prpp[c] + hxan[c] -> ppi[c] + imp[c]	0		HXPRT	prpp[c] + hxan[c] -> ppi[c] + imp[c]	0		HXPRT	prpp[c] + hxan[c] -> ppi[c] + imp[c]	0		HXPRT	prpp[c] + hxan[c] -> ppi[c] + imp[c]	0		HXPRT	prpp[c] + hxan[c] -> ppi[c] + imp[c]	0
IMPC	h2o[c] + imp[c] <=> fprica[c]	-0.0372869		IMPC	h2o[c] + imp[c] <=> fprica[c]	-0.0436368		IMPC	h2o[c] + imp[c] <=> fprica[c]	-0.0259094		IMPC	h2o[c] + imp[c] <=> fprica[c]	-0.00866842		IMPC	h2o[c] + imp[c] <=> fprica[c]	-0.0223706		IMPC	h2o[c] + imp[c] <=> fprica[c]	-0.0054041
IMPD	h2o[c] + nad[c] + imp[c] <=> h[c] + nadh[c] + xmp[c]	0.00684005		IMPD	h2o[c] + nad[c] + imp[c] <=> h[c] + nadh[c] + xmp[c]	0.0080049		IMPD	h2o[c] + nad[c] + imp[c] <=> h[c] + nadh[c] + xmp[c]	0.00475292		IMPD	h2o[c] + nad[c] + imp[c] <=> h[c] + nadh[c] + xmp[c]	0.00159017		IMPD	h2o[c] + nad[c] + imp[c] <=> h[c] + nadh[c] + xmp[c]	0.00410374		IMPD	h2o[c] + nad[c] + imp[c] <=> h[c] + nadh[c] + xmp[c]	0.000991349
ITPASE	h2o[c] + ditp[c] -> ppi[c] + dimp[c]	0		ITPASE	h2o[c] + ditp[c] -> ppi[c] + dimp[c]	0		ITPASE	h2o[c] + ditp[c] -> ppi[c] + dimp[c]	0		ITPASE	h2o[c] + ditp[c] -> ppi[c] + dimp[c]	0		ITPASE	h2o[c] + ditp[c] -> ppi[c] + dimp[c]	0		ITPASE	h2o[c] + ditp[c] -> ppi[c] + dimp[c]	0
MCSNAH1r	h2o[c] + h[c] + 5mcsn[c] -> nh4[c] + thym[c]	0		MCSNAH1r	h2o[c] + h[c] + 5mcsn[c] -> nh4[c] + thym[c]	0		MCSNAH1r	h2o[c] + h[c] + 5mcsn[c] -> nh4[c] + thym[c]	0		MCSNAH1r	h2o[c] + h[c] + 5mcsn[c] -> nh4[c] + thym[c]	0		MCSNAH1r	h2o[c] + h[c] + 5mcsn[c] -> nh4[c] + thym[c]	0		MCSNAH1r	h2o[c] + h[c] + 5mcsn[c] -> nh4[c] + thym[c]	0
MTAP	pi[c] + h[c] + 5mta[c] <=> 5mdr1p[c] + ade[c]	0		MTAP	pi[c] + h[c] + 5mta[c] <=> 5mdr1p[c] + ade[c]	0		MTAP	pi[c] + h[c] + 5mta[c] <=> 5mdr1p[c] + ade[c]	0		MTAP	pi[c] + h[c] + 5mta[c] <=> 5mdr1p[c] + ade[c]	0		MTAP	pi[c] + h[c] + 5mta[c] <=> 5mdr1p[c] + ade[c]	0		MTAP	pi[c] + h[c] + 5mta[c] <=> 5mdr1p[c] + ade[c]	0
NCTPPRT	ppi[c] + nicrnt[c] <=> h[c] + prpp[c] + nac[c]	-0.00585462		NCTPPRT	ppi[c] + nicrnt[c] <=> h[c] + prpp[c] + nac[c]	-0.00685165		NCTPPRT	ppi[c] + nicrnt[c] <=> h[c] + prpp[c] + nac[c]	-0.00406817		NCTPPRT	ppi[c] + nicrnt[c] <=> h[c] + prpp[c] + nac[c]	-0.00136108		NCTPPRT	ppi[c] + nicrnt[c] <=> h[c] + prpp[c] + nac[c]	-0.00351253		NCTPPRT	ppi[c] + nicrnt[c] <=> h[c] + prpp[c] + nac[c]	-0.000848528
NDPK1	atp[c] + gdp[c] <=> gtp[c] + adp[c]	1000		NDPK1	atp[c] + gdp[c] <=> gtp[c] + adp[c]	1000		NDPK1	atp[c] + gdp[c] <=> gtp[c] + adp[c]	1000		NDPK1	atp[c] + gdp[c] <=> gtp[c] + adp[c]	1000		NDPK1	atp[c] + gdp[c] <=> gtp[c] + adp[c]	1000		NDPK1	atp[c] + gdp[c] <=> gtp[c] + adp[c]	1000
NDPK2	atp[c] + udp[c] <=> utp[c] + adp[c]	0.122228		NDPK2	atp[c] + udp[c] <=> utp[c] + adp[c]	0.143043		NDPK2	atp[c] + udp[c] <=> utp[c] + adp[c]	0.0849322		NDPK2	atp[c] + udp[c] <=> utp[c] + adp[c]	0.0284155		NDPK2	atp[c] + udp[c] <=> utp[c] + adp[c]	0.0733318		NDPK2	atp[c] + udp[c] <=> utp[c] + adp[c]	0.0177149
NDPK3	atp[c] + cdp[c] <=> ctp[c] + adp[c]	0.0194912		NDPK3	atp[c] + cdp[c] <=> ctp[c] + adp[c]	0.0228105		NDPK3	atp[c] + cdp[c] <=> ctp[c] + adp[c]	0.0135438		NDPK3	atp[c] + cdp[c] <=> ctp[c] + adp[c]	0.00453129		NDPK3	atp[c] + cdp[c] <=> ctp[c] + adp[c]	0.0116939		NDPK3	atp[c] + cdp[c] <=> ctp[c] + adp[c]	0.00282492
NDPK4	atp[c] + dtdp[c] <=> dttp[c] + adp[c]	-999.998		NDPK4	atp[c] + dtdp[c] <=> dttp[c] + adp[c]	-999.997		NDPK4	atp[c] + dtdp[c] <=> dttp[c] + adp[c]	-999.998		NDPK4	atp[c] + dtdp[c] <=> dttp[c] + adp[c]	-999.999		NDPK4	atp[c] + dtdp[c] <=> dttp[c] + adp[c]	-999.999		NDPK4	atp[c] + dtdp[c] <=> dttp[c] + adp[c]	-1000
NDPK5	atp[c] + dgdp[c] <=> dgtp[c] + adp[c]	-999.962		NDPK5	atp[c] + dgdp[c] <=> dgtp[c] + adp[c]	-999.956		NDPK5	atp[c] + dgdp[c] <=> dgtp[c] + adp[c]	-999.974		NDPK5	atp[c] + dgdp[c] <=> dgtp[c] + adp[c]	-999.991		NDPK5	atp[c] + dgdp[c] <=> dgtp[c] + adp[c]	-999.977		NDPK5	atp[c] + dgdp[c] <=> dgtp[c] + adp[c]	1000
NDPK6	atp[c] + dudp[c] <=> adp[c] + dutp[c]	-0.00230707		NDPK6	atp[c] + dudp[c] <=> adp[c] + dutp[c]	-0.00269996		NDPK6	atp[c] + dudp[c] <=> adp[c] + dutp[c]	-0.0016031		NDPK6	atp[c] + dudp[c] <=> adp[c] + dutp[c]	-0.000536345		NDPK6	atp[c] + dudp[c] <=> adp[c] + dutp[c]	-0.00138414		NDPK6	atp[c] + dudp[c] <=> adp[c] + dutp[c]	-0.00033437
NDPK7	atp[c] + dcdp[c] <=> dctp[c] + adp[c]	-1000		NDPK7	atp[c] + dcdp[c] <=> dctp[c] + adp[c]	-1000		NDPK7	atp[c] + dcdp[c] <=> dctp[c] + adp[c]	-1000		NDPK7	atp[c] + dcdp[c] <=> dctp[c] + adp[c]	-1000		NDPK7	atp[c] + dcdp[c] <=> dctp[c] + adp[c]	-1000		NDPK7	atp[c] + dcdp[c] <=> dctp[c] + adp[c]	-1000
NDPK8	atp[c] + dadp[c] <=> datp[c] + adp[c]	0.00678209		NDPK8	atp[c] + dadp[c] <=> datp[c] + adp[c]	0.00793706		NDPK8	atp[c] + dadp[c] <=> datp[c] + adp[c]	1000		NDPK8	atp[c] + dadp[c] <=> datp[c] + adp[c]	0.00157669		NDPK8	atp[c] + dadp[c] <=> datp[c] + adp[c]	1000		NDPK8	atp[c] + dadp[c] <=> datp[c] + adp[c]	0.00544107
NDPK9	atp[c] + idp[c] <=> adp[c] + itp[c]	0		NDPK9	atp[c] + idp[c] <=> adp[c] + itp[c]	0		NDPK9	atp[c] + idp[c] <=> adp[c] + itp[c]	0		NDPK9	atp[c] + idp[c] <=> adp[c] + itp[c]	0		NDPK9	atp[c] + idp[c] <=> adp[c] + itp[c]	0		NDPK9	atp[c] + idp[c] <=> adp[c] + itp[c]	0
NTPP1	h2o[c] + dgtp[c] -> ppi[c] + dgmp[c]	0		NTPP1	h2o[c] + dgtp[c] -> ppi[c] + dgmp[c]	0		NTPP1	h2o[c] + dgtp[c] -> ppi[c] + dgmp[c]	0		NTPP1	h2o[c] + dgtp[c] -> ppi[c] + dgmp[c]	0		NTPP1	h2o[c] + dgtp[c] -> ppi[c] + dgmp[c]	0		NTPP1	h2o[c] + dgtp[c] -> ppi[c] + dgmp[c]	0
NTPP2	h2o[c] + gtp[c] -> gmp[c] + ppi[c]	0		NTPP2	h2o[c] + gtp[c] -> gmp[c] + ppi[c]	0		NTPP2	h2o[c] + gtp[c] -> gmp[c] + ppi[c]	0		NTPP2	h2o[c] + gtp[c] -> gmp[c] + ppi[c]	0		NTPP2	h2o[c] + gtp[c] -> gmp[c] + ppi[c]	0		NTPP2	h2o[c] + gtp[c] -> gmp[c] + ppi[c]	0
NTPP8	h2o[c] + utp[c] -> ppi[c] + ump[c]	0		NTPP8	h2o[c] + utp[c] -> ppi[c] + ump[c]	0		NTPP8	h2o[c] + utp[c] -> ppi[c] + ump[c]	0		NTPP8	h2o[c] + utp[c] -> ppi[c] + ump[c]	0		NTPP8	h2o[c] + utp[c] -> ppi[c] + ump[c]	0		NTPP8	h2o[c] + utp[c] -> ppi[c] + ump[c]	0
NTPP9	h2o[c] + itp[c] -> ppi[c] + imp[c]	0		NTPP9	h2o[c] + itp[c] -> ppi[c] + imp[c]	0		NTPP9	h2o[c] + itp[c] -> ppi[c] + imp[c]	0		NTPP9	h2o[c] + itp[c] -> ppi[c] + imp[c]	0		NTPP9	h2o[c] + itp[c] -> ppi[c] + imp[c]	0		NTPP9	h2o[c] + itp[c] -> ppi[c] + imp[c]	0
NTPTP1	h2o[c] + dgtp[c] -> h[c] + pppi[c] + dgsn[c]	0		NTPTP1	h2o[c] + dgtp[c] -> h[c] + pppi[c] + dgsn[c]	0		NTPTP1	h2o[c] + dgtp[c] -> h[c] + pppi[c] + dgsn[c]	0		NTPTP1	h2o[c] + dgtp[c] -> h[c] + pppi[c] + dgsn[c]	0		NTPTP1	h2o[c] + dgtp[c] -> h[c] + pppi[c] + dgsn[c]	0		NTPTP1	h2o[c] + dgtp[c] -> h[c] + pppi[c] + dgsn[c]	0
OMPDC	h[c] + orot5p[c] -> co2[c] + ump[c]	0.0647718		OMPDC	h[c] + orot5p[c] -> co2[c] + ump[c]	0.0758023		OMPDC	h[c] + orot5p[c] -> co2[c] + ump[c]	0.0450077		OMPDC	h[c] + orot5p[c] -> co2[c] + ump[c]	0.0150581		OMPDC	h[c] + orot5p[c] -> co2[c] + ump[c]	0.0388604		OMPDC	h[c] + orot5p[c] -> co2[c] + ump[c]	0.00938757
ORPT	prpp[c] + orot[c] -> ppi[c] + orot5p[c]	0.0647718		ORPT	prpp[c] + orot[c] -> ppi[c] + orot5p[c]	0.0758023		ORPT	prpp[c] + orot[c] -> ppi[c] + orot5p[c]	0.0450077		ORPT	prpp[c] + orot[c] -> ppi[c] + orot5p[c]	0.0150581		ORPT	prpp[c] + orot[c] -> ppi[c] + orot5p[c]	0.0388604		ORPT	prpp[c] + orot[c] -> ppi[c] + orot5p[c]	0.00938757
PRAGS	atp[c] + gly[c] + pram[c] -> pi[c] + h[c] + adp[c] + gar[c]	0.028905		PRAGS	atp[c] + gly[c] + pram[c] -> pi[c] + h[c] + adp[c] + gar[c]	0.0338274		PRAGS	atp[c] + gly[c] + pram[c] -> pi[c] + h[c] + adp[c] + gar[c]	0.0200851		PRAGS	atp[c] + gly[c] + pram[c] -> pi[c] + h[c] + adp[c] + gar[c]	0.00671979		PRAGS	atp[c] + gly[c] + pram[c] -> pi[c] + h[c] + adp[c] + gar[c]	0.0173418		PRAGS	atp[c] + gly[c] + pram[c] -> pi[c] + h[c] + adp[c] + gar[c]	0.00418928
PRAIS	atp[c] + fpram[c] <=> pi[c] + h[c] + adp[c] + air[c]	0.028905		PRAIS	atp[c] + fpram[c] <=> pi[c] + h[c] + adp[c] + air[c]	0.0338274		PRAIS	atp[c] + fpram[c] <=> pi[c] + h[c] + adp[c] + air[c]	0.0200851		PRAIS	atp[c] + fpram[c] <=> pi[c] + h[c] + adp[c] + air[c]	0.00671979		PRAIS	atp[c] + fpram[c] <=> pi[c] + h[c] + adp[c] + air[c]	0.0173418		PRAIS	atp[c] + fpram[c] <=> pi[c] + h[c] + adp[c] + air[c]	0.00418928
PRASCS	atp[c] + asp-L[c] + 5aizc[c] -> pi[c] + 2 h[c] + adp[c] + 25aics[c]	0.028905		PRASCS	atp[c] + asp-L[c] + 5aizc[c] -> pi[c] + 2 h[c] + adp[c] + 25aics[c]	0.0338274		PRASCS	atp[c] + asp-L[c] + 5aizc[c] -> pi[c] + 2 h[c] + adp[c] + 25aics[c]	0.0200851		PRASCS	atp[c] + asp-L[c] + 5aizc[c] -> pi[c] + 2 h[c] + adp[c] + 25aics[c]	0.00671979		PRASCS	atp[c] + asp-L[c] + 5aizc[c] -> pi[c] + 2 h[c] + adp[c] + 25aics[c]	0.0173418		PRASCS	atp[c] + asp-L[c] + 5aizc[c] -> pi[c] + 2 h[c] + adp[c] + 25aics[c]	0.00418928
PRFGS	h2o[c] + atp[c] + gln-L[c] + fgam[c] -> glu-L[c] + pi[c] + h[c] + adp[c] + fpram[c]	0.028905		PRFGS	h2o[c] + atp[c] + gln-L[c] + fgam[c] -> glu-L[c] + pi[c] + h[c] + adp[c] + fpram[c]	0.0338274		PRFGS	h2o[c] + atp[c] + gln-L[c] + fgam[c] -> glu-L[c] + pi[c] + h[c] + adp[c] + fpram[c]	0.0200851		PRFGS	h2o[c] + atp[c] + gln-L[c] + fgam[c] -> glu-L[c] + pi[c] + h[c] + adp[c] + fpram[c]	0.00671979		PRFGS	h2o[c] + atp[c] + gln-L[c] + fgam[c] -> glu-L[c] + pi[c] + h[c] + adp[c] + fpram[c]	0.0173418		PRFGS	h2o[c] + atp[c] + gln-L[c] + fgam[c] -> glu-L[c] + pi[c] + h[c] + adp[c] + fpram[c]	0.00418928
PRPPS	atp[c] + r5p[c] <=> amp[c] + prpp[c]	0.114475		PRPPS	atp[c] + r5p[c] <=> amp[c] + prpp[c]	0.13397		PRPPS	atp[c] + r5p[c] <=> amp[c] + prpp[c]	0.0795449		PRPPS	atp[c] + r5p[c] <=> amp[c] + prpp[c]	0.0266131		PRPPS	atp[c] + r5p[c] <=> amp[c] + prpp[c]	0.0686803		PRPPS	atp[c] + r5p[c] <=> amp[c] + prpp[c]	0.0165912
PYNP1	pi[c] + h[c] + cytd[c] <=> r1p[c] + csn[c]	0		PYNP1	pi[c] + h[c] + cytd[c] <=> r1p[c] + csn[c]	0		PYNP1	pi[c] + h[c] + cytd[c] <=> r1p[c] + csn[c]	0		PYNP1	pi[c] + h[c] + cytd[c] <=> r1p[c] + csn[c]	0		PYNP1	pi[c] + h[c] + cytd[c] <=> r1p[c] + csn[c]	0		PYNP1	pi[c] + h[c] + cytd[c] <=> r1p[c] + csn[c]	0
PYNP2r	pi[c] + h[c] + uri[c] <=> r1p[c] + ura[c]	0		PYNP2r	pi[c] + h[c] + uri[c] <=> r1p[c] + ura[c]	0		PYNP2r	pi[c] + h[c] + uri[c] <=> r1p[c] + ura[c]	0		PYNP2r	pi[c] + h[c] + uri[c] <=> r1p[c] + ura[c]	0		PYNP2r	pi[c] + h[c] + uri[c] <=> r1p[c] + ura[c]	0		PYNP2r	pi[c] + h[c] + uri[c] <=> r1p[c] + ura[c]	0
RNTR1	atp[c] + trdrd[c] -> h2o[c] + datp[c] + trdox[c]	0.00230707		RNTR1	atp[c] + trdrd[c] -> h2o[c] + datp[c] + trdox[c]	0.00269996		RNTR1	atp[c] + trdrd[c] -> h2o[c] + datp[c] + trdox[c]	0.0016031		RNTR1	atp[c] + trdrd[c] -> h2o[c] + datp[c] + trdox[c]	0.000536345		RNTR1	atp[c] + trdrd[c] -> h2o[c] + datp[c] + trdox[c]	0.00138414		RNTR1	atp[c] + trdrd[c] -> h2o[c] + datp[c] + trdox[c]	0.00033437
RNTR2	gtp[c] + trdrd[c] -> h2o[c] + dgtp[c] + trdox[c]	0.001739		RNTR2	gtp[c] + trdrd[c] -> h2o[c] + dgtp[c] + trdox[c]	0.00203514		RNTR2	gtp[c] + trdrd[c] -> h2o[c] + dgtp[c] + trdox[c]	0.00120837		RNTR2	gtp[c] + trdrd[c] -> h2o[c] + dgtp[c] + trdox[c]	0.00040428		RNTR2	gtp[c] + trdrd[c] -> h2o[c] + dgtp[c] + trdox[c]	0.00104332		RNTR2	gtp[c] + trdrd[c] -> h2o[c] + dgtp[c] + trdox[c]	0.000252038
RNTR3	ctp[c] + trdrd[c] -> h2o[c] + dctp[c] + trdox[c]	0.001739		RNTR3	ctp[c] + trdrd[c] -> h2o[c] + dctp[c] + trdox[c]	0.00203514		RNTR3	ctp[c] + trdrd[c] -> h2o[c] + dctp[c] + trdox[c]	0.00120837		RNTR3	ctp[c] + trdrd[c] -> h2o[c] + dctp[c] + trdox[c]	0.00040428		RNTR3	ctp[c] + trdrd[c] -> h2o[c] + dctp[c] + trdox[c]	0.00104332		RNTR3	ctp[c] + trdrd[c] -> h2o[c] + dctp[c] + trdox[c]	0.000252038
RNTR4	utp[c] + trdrd[c] -> h2o[c] + trdox[c] + dutp[c]	0.00230707		RNTR4	utp[c] + trdrd[c] -> h2o[c] + trdox[c] + dutp[c]	0.00269996		RNTR4	utp[c] + trdrd[c] -> h2o[c] + trdox[c] + dutp[c]	0.0016031		RNTR4	utp[c] + trdrd[c] -> h2o[c] + trdox[c] + dutp[c]	0.000536345		RNTR4	utp[c] + trdrd[c] -> h2o[c] + trdox[c] + dutp[c]	0.00138414		RNTR4	utp[c] + trdrd[c] -> h2o[c] + trdox[c] + dutp[c]	0.00033437
TMDS	mlthf[c] + dump[c] -> dhf[c] + dtmp[c]	0.00230707		TMDS	mlthf[c] + dump[c] -> dhf[c] + dtmp[c]	0.00269996		TMDS	mlthf[c] + dump[c] -> dhf[c] + dtmp[c]	0.0016031		TMDS	mlthf[c] + dump[c] -> dhf[c] + dtmp[c]	0.000536345		TMDS	mlthf[c] + dump[c] -> dhf[c] + dtmp[c]	0.00138414		TMDS	mlthf[c] + dump[c] -> dhf[c] + dtmp[c]	0.00033437
UPPRT	prpp[c] + ura[c] -> ppi[c] + ump[c]	0		UPPRT	prpp[c] + ura[c] -> ppi[c] + ump[c]	0		UPPRT	prpp[c] + ura[c] -> ppi[c] + ump[c]	0		UPPRT	prpp[c] + ura[c] -> ppi[c] + ump[c]	0		UPPRT	prpp[c] + ura[c] -> ppi[c] + ump[c]	0		UPPRT	prpp[c] + ura[c] -> ppi[c] + ump[c]	0
URIDK1	atp[c] + ump[c] <=> adp[c] + udp[c]	0.0882483		URIDK1	atp[c] + ump[c] <=> adp[c] + udp[c]	0.103277		URIDK1	atp[c] + ump[c] <=> adp[c] + udp[c]	0.0613207		URIDK1	atp[c] + ump[c] <=> adp[c] + udp[c]	0.0205159		URIDK1	atp[c] + ump[c] <=> adp[c] + udp[c]	0.0529452		URIDK1	atp[c] + ump[c] <=> adp[c] + udp[c]	0.0127901
URIDK2r	atp[c] + dump[c] <=> adp[c] + dudp[c]	-0.00230707		URIDK2r	atp[c] + dump[c] <=> adp[c] + dudp[c]	-0.00269996		URIDK2r	atp[c] + dump[c] <=> adp[c] + dudp[c]	-0.0016031		URIDK2r	atp[c] + dump[c] <=> adp[c] + dudp[c]	-0.000536345		URIDK2r	atp[c] + dump[c] <=> adp[c] + dudp[c]	-0.00138414		URIDK2r	atp[c] + dump[c] <=> adp[c] + dudp[c]	-0.00033437
XAND	h2o[c] + nad[c] + xan[c] <=> h[c] + nadh[c] + urate[c]	0		XAND	h2o[c] + nad[c] + xan[c] <=> h[c] + nadh[c] + urate[c]	0		XAND	h2o[c] + nad[c] + xan[c] <=> h[c] + nadh[c] + urate[c]	0		XAND	h2o[c] + nad[c] + xan[c] <=> h[c] + nadh[c] + urate[c]	0		XAND	h2o[c] + nad[c] + xan[c] <=> h[c] + nadh[c] + urate[c]	0		XAND	h2o[c] + nad[c] + xan[c] <=> h[c] + nadh[c] + urate[c]	0
XPPT	prpp[c] + xan[c] -> ppi[c] + xmp[c]	0		XPPT	prpp[c] + xan[c] -> ppi[c] + xmp[c]	0		XPPT	prpp[c] + xan[c] -> ppi[c] + xmp[c]	0		XPPT	prpp[c] + xan[c] -> ppi[c] + xmp[c]	0		XPPT	prpp[c] + xan[c] -> ppi[c] + xmp[c]	0		XPPT	prpp[c] + xan[c] -> ppi[c] + xmp[c]	0
XTPASE	h2o[c] + xtp[c] -> ppi[c] + xmp[c]	0		XTPASE	h2o[c] + xtp[c] -> ppi[c] + xmp[c]	0		XTPASE	h2o[c] + xtp[c] -> ppi[c] + xmp[c]	0		XTPASE	h2o[c] + xtp[c] -> ppi[c] + xmp[c]	0		XTPASE	h2o[c] + xtp[c] -> ppi[c] + xmp[c]	0		XTPASE	h2o[c] + xtp[c] -> ppi[c] + xmp[c]	0
YUMPS	r5p[c] + ura[c] <=> h2o[c] + psd5p[c]	0		YUMPS	r5p[c] + ura[c] <=> h2o[c] + psd5p[c]	0		YUMPS	r5p[c] + ura[c] <=> h2o[c] + psd5p[c]	0		YUMPS	r5p[c] + ura[c] <=> h2o[c] + psd5p[c]	0		YUMPS	r5p[c] + ura[c] <=> h2o[c] + psd5p[c]	0		YUMPS	r5p[c] + ura[c] <=> h2o[c] + psd5p[c]	0
AOBUTDs	h[c] + 2aobut[c] -> co2[c] + aact[c]	0		AOBUTDs	h[c] + 2aobut[c] -> co2[c] + aact[c]	0		AOBUTDs	h[c] + 2aobut[c] -> co2[c] + aact[c]	0		AOBUTDs	h[c] + 2aobut[c] -> co2[c] + aact[c]	0		AOBUTDs	h[c] + 2aobut[c] -> co2[c] + aact[c]	0		AOBUTDs	h[c] + 2aobut[c] -> co2[c] + aact[c]	0
AOXHEXCYCL	6a2ohxnt[c] -> h2o[c] + h[c] + 1pipdn2c[c]	0		AOXHEXCYCL	6a2ohxnt[c] -> h2o[c] + h[c] + 1pipdn2c[c]	0		AOXHEXCYCL	6a2ohxnt[c] -> h2o[c] + h[c] + 1pipdn2c[c]	0		AOXHEXCYCL	6a2ohxnt[c] -> h2o[c] + h[c] + 1pipdn2c[c]	0		AOXHEXCYCL	6a2ohxnt[c] -> h2o[c] + h[c] + 1pipdn2c[c]	0		AOXHEXCYCL	6a2ohxnt[c] -> h2o[c] + h[c] + 1pipdn2c[c]	0
SELNPS	h2o[c] + atp[c] + seln[c] <=> amp[c] + pi[c] + 2 h[c] + selnp[c]	0		SELNPS	h2o[c] + atp[c] + seln[c] <=> amp[c] + pi[c] + 2 h[c] + selnp[c]	0		SELNPS	h2o[c] + atp[c] + seln[c] <=> amp[c] + pi[c] + 2 h[c] + selnp[c]	0		SELNPS	h2o[c] + atp[c] + seln[c] <=> amp[c] + pi[c] + 2 h[c] + selnp[c]	0		SELNPS	h2o[c] + atp[c] + seln[c] <=> amp[c] + pi[c] + 2 h[c] + selnp[c]	0		SELNPS	h2o[c] + atp[c] + seln[c] <=> amp[c] + pi[c] + 2 h[c] + selnp[c]	0
ATPS4r	pi[c] + adp[c] + 4 h[e] <=> h2o[c] + atp[c] + 3 h[c]	-0.660698		ATPS4r	pi[c] + adp[c] + 4 h[e] <=> h2o[c] + atp[c] + 3 h[c]	1.43141		ATPS4r	pi[c] + adp[c] + 4 h[e] <=> h2o[c] + atp[c] + 3 h[c]	0.915904		ATPS4r	pi[c] + adp[c] + 4 h[e] <=> h2o[c] + atp[c] + 3 h[c]	2.91065		ATPS4r	pi[c] + adp[c] + 4 h[e] <=> h2o[c] + atp[c] + 3 h[c]	7.32183		ATPS4r	pi[c] + adp[c] + 4 h[e] <=> h2o[c] + atp[c] + 3 h[c]	-8.14024
BTNabc	h2o[c] + atp[c] + btn[e] -> pi[c] + h[c] + adp[c] + btn[c]	0		BTNabc	h2o[c] + atp[c] + btn[e] -> pi[c] + h[c] + adp[c] + btn[c]	0		BTNabc	h2o[c] + atp[c] + btn[e] -> pi[c] + h[c] + adp[c] + btn[c]	0		BTNabc	h2o[c] + atp[c] + btn[e] -> pi[c] + h[c] + adp[c] + btn[c]	0		BTNabc	h2o[c] + atp[c] + btn[e] -> pi[c] + h[c] + adp[c] + btn[c]	0		BTNabc	h2o[c] + atp[c] + btn[e] -> pi[c] + h[c] + adp[c] + btn[c]	0
BUTSabc	h2o[c] + atp[c] + buts[e] -> pi[c] + h[c] + adp[c] + buts[c]	0		BUTSabc	h2o[c] + atp[c] + buts[e] -> pi[c] + h[c] + adp[c] + buts[c]	0		BUTSabc	h2o[c] + atp[c] + buts[e] -> pi[c] + h[c] + adp[c] + buts[c]	0		BUTSabc	h2o[c] + atp[c] + buts[e] -> pi[c] + h[c] + adp[c] + buts[c]	0		BUTSabc	h2o[c] + atp[c] + buts[e] -> pi[c] + h[c] + adp[c] + buts[c]	0		BUTSabc	h2o[c] + atp[c] + buts[e] -> pi[c] + h[c] + adp[c] + buts[c]	0
CA2abc	h2o[c] + atp[c] + ca2[e] -> ca2[c] + pi[c] + h[c] + adp[c]	0.000370986		CA2abc	h2o[c] + atp[c] + ca2[e] -> ca2[c] + pi[c] + h[c] + adp[c]	0.000434164		CA2abc	h2o[c] + atp[c] + ca2[e] -> ca2[c] + pi[c] + h[c] + adp[c]	0.000257785		CA2abc	h2o[c] + atp[c] + ca2[e] -> ca2[c] + pi[c] + h[c] + adp[c]	8.62464e-05		CA2abc	h2o[c] + atp[c] + ca2[e] -> ca2[c] + pi[c] + h[c] + adp[c]	0.000222576		CA2abc	h2o[c] + atp[c] + ca2[e] -> ca2[c] + pi[c] + h[c] + adp[c]	5.37681e-05
CBL1abc	h2o[c] + atp[c] + cbl1[e] -> pi[c] + h[c] + adp[c] + cbl1[c]	0		CBL1abc	h2o[c] + atp[c] + cbl1[e] -> pi[c] + h[c] + adp[c] + cbl1[c]	0		CBL1abc	h2o[c] + atp[c] + cbl1[e] -> pi[c] + h[c] + adp[c] + cbl1[c]	0		CBL1abc	h2o[c] + atp[c] + cbl1[e] -> pi[c] + h[c] + adp[c] + cbl1[c]	0		CBL1abc	h2o[c] + atp[c] + cbl1[e] -> pi[c] + h[c] + adp[c] + cbl1[c]	0		CBL1abc	h2o[c] + atp[c] + cbl1[e] -> pi[c] + h[c] + adp[c] + cbl1[c]	0
CBL2abc	h2o[c] + atp[c] + cbl2[e] -> pi[c] + h[c] + adp[c] + cbl2[c]	0		CBL2abc	h2o[c] + atp[c] + cbl2[e] -> pi[c] + h[c] + adp[c] + cbl2[c]	0		CBL2abc	h2o[c] + atp[c] + cbl2[e] -> pi[c] + h[c] + adp[c] + cbl2[c]	0		CBL2abc	h2o[c] + atp[c] + cbl2[e] -> pi[c] + h[c] + adp[c] + cbl2[c]	0		CBL2abc	h2o[c] + atp[c] + cbl2[e] -> pi[c] + h[c] + adp[c] + cbl2[c]	0		CBL2abc	h2o[c] + atp[c] + cbl2[e] -> pi[c] + h[c] + adp[c] + cbl2[c]	0
CBL3abc	h2o[c] + atp[c] + cbl3[e] -> pi[c] + h[c] + adp[c] + cbl3[c]	0		CBL3abc	h2o[c] + atp[c] + cbl3[e] -> pi[c] + h[c] + adp[c] + cbl3[c]	0		CBL3abc	h2o[c] + atp[c] + cbl3[e] -> pi[c] + h[c] + adp[c] + cbl3[c]	0		CBL3abc	h2o[c] + atp[c] + cbl3[e] -> pi[c] + h[c] + adp[c] + cbl3[c]	0		CBL3abc	h2o[c] + atp[c] + cbl3[e] -> pi[c] + h[c] + adp[c] + cbl3[c]	0		CBL3abc	h2o[c] + atp[c] + cbl3[e] -> pi[c] + h[c] + adp[c] + cbl3[c]	0
CD2abc	h2o[c] + atp[c] + cd2[c] -> pi[c] + h[c] + adp[c] + cd2[e]	0		CD2abc	h2o[c] + atp[c] + cd2[c] -> pi[c] + h[c] + adp[c] + cd2[e]	0		CD2abc	h2o[c] + atp[c] + cd2[c] -> pi[c] + h[c] + adp[c] + cd2[e]	0		CD2abc	h2o[c] + atp[c] + cd2[c] -> pi[c] + h[c] + adp[c] + cd2[e]	0		CD2abc	h2o[c] + atp[c] + cd2[c] -> pi[c] + h[c] + adp[c] + cd2[e]	0		CD2abc	h2o[c] + atp[c] + cd2[c] -> pi[c] + h[c] + adp[c] + cd2[e]	0
Clt	cl[e] <=> cl[c]	0		Clt	cl[e] <=> cl[c]	0		Clt	cl[e] <=> cl[c]	0		Clt	cl[e] <=> cl[c]	0		Clt	cl[e] <=> cl[c]	0		Clt	cl[e] <=> cl[c]	0
CO2t	co2[e] <=> co2[c]	0		CO2t	co2[e] <=> co2[c]	0		CO2t	co2[e] <=> co2[c]	0		CO2t	co2[e] <=> co2[c]	4.8788		CO2t	co2[e] <=> co2[c]	-7.31279		CO2t	co2[e] <=> co2[c]	10.2068
COBALTt	cobalt2[e] -> cobalt2[c]	0.000115933		COBALTt	cobalt2[e] -> cobalt2[c]	0.000135676		COBALTt	cobalt2[e] -> cobalt2[c]	8.05579e-05		COBALTt	cobalt2[e] -> cobalt2[c]	2.6952e-05		COBALTt	cobalt2[e] -> cobalt2[c]	6.9555e-05		COBALTt	cobalt2[e] -> cobalt2[c]	1.68025e-05
CU2abc	h2o[c] + atp[c] + cu2[c] -> pi[c] + h[c] + adp[c] + cu2[e]	0		CU2abc	h2o[c] + atp[c] + cu2[c] -> pi[c] + h[c] + adp[c] + cu2[e]	0		CU2abc	h2o[c] + atp[c] + cu2[c] -> pi[c] + h[c] + adp[c] + cu2[e]	0		CU2abc	h2o[c] + atp[c] + cu2[c] -> pi[c] + h[c] + adp[c] + cu2[e]	0		CU2abc	h2o[c] + atp[c] + cu2[c] -> pi[c] + h[c] + adp[c] + cu2[e]	0		CU2abc	h2o[c] + atp[c] + cu2[c] -> pi[c] + h[c] + adp[c] + cu2[e]	0
ETHSabc	h2o[c] + atp[c] + eths[e] -> pi[c] + h[c] + adp[c] + eths[c]	0		ETHSabc	h2o[c] + atp[c] + eths[e] -> pi[c] + h[c] + adp[c] + eths[c]	0		ETHSabc	h2o[c] + atp[c] + eths[e] -> pi[c] + h[c] + adp[c] + eths[c]	0		ETHSabc	h2o[c] + atp[c] + eths[e] -> pi[c] + h[c] + adp[c] + eths[c]	0		ETHSabc	h2o[c] + atp[c] + eths[e] -> pi[c] + h[c] + adp[c] + eths[c]	0		ETHSabc	h2o[c] + atp[c] + eths[e] -> pi[c] + h[c] + adp[c] + eths[c]	0
FE2abc	h2o[c] + atp[c] + fe2[e] -> pi[c] + h[c] + adp[c] + fe2[c]	0		FE2abc	h2o[c] + atp[c] + fe2[e] -> pi[c] + h[c] + adp[c] + fe2[c]	0		FE2abc	h2o[c] + atp[c] + fe2[e] -> pi[c] + h[c] + adp[c] + fe2[c]	0		FE2abc	h2o[c] + atp[c] + fe2[e] -> pi[c] + h[c] + adp[c] + fe2[c]	0		FE2abc	h2o[c] + atp[c] + fe2[e] -> pi[c] + h[c] + adp[c] + fe2[c]	0		FE2abc	h2o[c] + atp[c] + fe2[e] -> pi[c] + h[c] + adp[c] + fe2[c]	0
FE3abc	h2o[c] + atp[c] + fe3[e] -> fe3[c] + pi[c] + h[c] + adp[c]	0.000394173		FE3abc	h2o[c] + atp[c] + fe3[e] -> fe3[c] + pi[c] + h[c] + adp[c]	0.000461299		FE3abc	h2o[c] + atp[c] + fe3[e] -> fe3[c] + pi[c] + h[c] + adp[c]	0.000273897		FE3abc	h2o[c] + atp[c] + fe3[e] -> fe3[c] + pi[c] + h[c] + adp[c]	9.16368e-05		FE3abc	h2o[c] + atp[c] + fe3[e] -> fe3[c] + pi[c] + h[c] + adp[c]	0.000236487		FE3abc	h2o[c] + atp[c] + fe3[e] -> fe3[c] + pi[c] + h[c] + adp[c]	5.71286e-05
FRUpts	fru[e] + pep[c] <=> pyr[c] + f1p[c]	0		FRUpts	fru[e] + pep[c] <=> pyr[c] + f1p[c]	3		FRUpts	fru[e] + pep[c] <=> pyr[c] + f1p[c]	0		FRUpts	fru[e] + pep[c] <=> pyr[c] + f1p[c]	0		FRUpts	fru[e] + pep[c] <=> pyr[c] + f1p[c]	0		FRUpts	fru[e] + pep[c] <=> pyr[c] + f1p[c]	0
GALCTRt2	h[e] + galctr-D[e] <=> h[c] + galctr-D[c]	0		GALCTRt2	h[e] + galctr-D[e] <=> h[c] + galctr-D[c]	0		GALCTRt2	h[e] + galctr-D[e] <=> h[c] + galctr-D[c]	0		GALCTRt2	h[e] + galctr-D[e] <=> h[c] + galctr-D[c]	0		GALCTRt2	h[e] + galctr-D[e] <=> h[c] + galctr-D[c]	0		GALCTRt2	h[e] + galctr-D[e] <=> h[c] + galctr-D[c]	0
GLCRt2	h[e] + glcr[e] <=> h[c] + glcr[c]	0		GLCRt2	h[e] + glcr[e] <=> h[c] + glcr[c]	0		GLCRt2	h[e] + glcr[e] <=> h[c] + glcr[c]	0		GLCRt2	h[e] + glcr[e] <=> h[c] + glcr[c]	0		GLCRt2	h[e] + glcr[e] <=> h[c] + glcr[c]	0		GLCRt2	h[e] + glcr[e] <=> h[c] + glcr[c]	0
GLCt2	glc-D[e] + h[e] -> h[c] + glc-D[c]	3		GLCt2	glc-D[e] + h[e] -> h[c] + glc-D[c]	0		GLCt2	glc-D[e] + h[e] -> h[c] + glc-D[c]	0		GLCt2	glc-D[e] + h[e] -> h[c] + glc-D[c]	0		GLCt2	glc-D[e] + h[e] -> h[c] + glc-D[c]	0		GLCt2	glc-D[e] + h[e] -> h[c] + glc-D[c]	0
GLNabc	h2o[c] + atp[c] + gln-L[e] -> gln-L[c] + pi[c] + h[c] + adp[c]	0		GLNabc	h2o[c] + atp[c] + gln-L[e] -> gln-L[c] + pi[c] + h[c] + adp[c]	0		GLNabc	h2o[c] + atp[c] + gln-L[e] -> gln-L[c] + pi[c] + h[c] + adp[c]	0		GLNabc	h2o[c] + atp[c] + gln-L[e] -> gln-L[c] + pi[c] + h[c] + adp[c]	0		GLNabc	h2o[c] + atp[c] + gln-L[e] -> gln-L[c] + pi[c] + h[c] + adp[c]	0		GLNabc	h2o[c] + atp[c] + gln-L[e] -> gln-L[c] + pi[c] + h[c] + adp[c]	0
GLY3Pt	h[e] + glyc3p[e] <=> h[c] + glyc3p[c]	0		GLY3Pt	h[e] + glyc3p[e] <=> h[c] + glyc3p[c]	0		GLY3Pt	h[e] + glyc3p[e] <=> h[c] + glyc3p[c]	0		GLY3Pt	h[e] + glyc3p[e] <=> h[c] + glyc3p[c]	0		GLY3Pt	h[e] + glyc3p[e] <=> h[c] + glyc3p[c]	0		GLY3Pt	h[e] + glyc3p[e] <=> h[c] + glyc3p[c]	0
GLYC3Pabc	h2o[c] + atp[c] + glyc3p[e] -> pi[c] + h[c] + adp[c] + glyc3p[c]	0		GLYC3Pabc	h2o[c] + atp[c] + glyc3p[e] -> pi[c] + h[c] + adp[c] + glyc3p[c]	0		GLYC3Pabc	h2o[c] + atp[c] + glyc3p[e] -> pi[c] + h[c] + adp[c] + glyc3p[c]	0		GLYC3Pabc	h2o[c] + atp[c] + glyc3p[e] -> pi[c] + h[c] + adp[c] + glyc3p[c]	0		GLYC3Pabc	h2o[c] + atp[c] + glyc3p[e] -> pi[c] + h[c] + adp[c] + glyc3p[c]	0		GLYC3Pabc	h2o[c] + atp[c] + glyc3p[e] -> pi[c] + h[c] + adp[c] + glyc3p[c]	0
GLYCLTt2r	h[e] + glyclt[e] <=> h[c] + glyclt[c]	0		GLYCLTt2r	h[e] + glyclt[e] <=> h[c] + glyclt[c]	0		GLYCLTt2r	h[e] + glyclt[e] <=> h[c] + glyclt[c]	0		GLYCLTt2r	h[e] + glyclt[e] <=> h[c] + glyclt[c]	0		GLYCLTt2r	h[e] + glyclt[e] <=> h[c] + glyclt[c]	0		GLYCLTt2r	h[e] + glyclt[e] <=> h[c] + glyclt[c]	0
H2Ot	h2o[c] <=> h2o[e]	2.64363		H2Ot	h2o[c] <=> h2o[e]	3.09383		H2Ot	h2o[c] <=> h2o[e]	1.83697		H2Ot	h2o[c] <=> h2o[e]	5.49338		H2Ot	h2o[c] <=> h2o[e]	-5.72672		H2Ot	h2o[c] <=> h2o[e]	10.5899
H2St	h2s[c] <=> h2s[e]	-0.0164422		H2St	h2s[c] <=> h2s[e]	-0.0192422		H2St	h2s[c] <=> h2s[e]	-0.0114251		H2St	h2s[c] <=> h2s[e]	-0.00382245		H2St	h2s[c] <=> h2s[e]	-0.0098646		H2St	h2s[c] <=> h2s[e]	-0.00238301
H2td	h2[c] <=> h2[e]	0		H2td	h2[c] <=> h2[e]	0		H2td	h2[c] <=> h2[e]	0		H2td	h2[c] <=> h2[e]	-10		H2td	h2[c] <=> h2[e]	0		H2td	h2[c] <=> h2[e]	0
HEXSabc	h2o[c] + atp[c] + hexs[e] -> pi[c] + h[c] + adp[c] + hexs[c]	0		HEXSabc	h2o[c] + atp[c] + hexs[e] -> pi[c] + h[c] + adp[c] + hexs[c]	0		HEXSabc	h2o[c] + atp[c] + hexs[e] -> pi[c] + h[c] + adp[c] + hexs[c]	0		HEXSabc	h2o[c] + atp[c] + hexs[e] -> pi[c] + h[c] + adp[c] + hexs[c]	0		HEXSabc	h2o[c] + atp[c] + hexs[e] -> pi[c] + h[c] + adp[c] + hexs[c]	0		HEXSabc	h2o[c] + atp[c] + hexs[e] -> pi[c] + h[c] + adp[c] + hexs[c]	0
HG2abc	h2o[c] + atp[c] + hg2[c] -> pi[c] + h[c] + adp[c] + hg2[e]	0		HG2abc	h2o[c] + atp[c] + hg2[c] -> pi[c] + h[c] + adp[c] + hg2[e]	0		HG2abc	h2o[c] + atp[c] + hg2[c] -> pi[c] + h[c] + adp[c] + hg2[e]	0		HG2abc	h2o[c] + atp[c] + hg2[c] -> pi[c] + h[c] + adp[c] + hg2[e]	0		HG2abc	h2o[c] + atp[c] + hg2[c] -> pi[c] + h[c] + adp[c] + hg2[e]	0		HG2abc	h2o[c] + atp[c] + hg2[c] -> pi[c] + h[c] + adp[c] + hg2[e]	0
HXANt2r	h[e] + hxan[e] <=> h[c] + hxan[c]	0		HXANt2r	h[e] + hxan[e] <=> h[c] + hxan[c]	0		HXANt2r	h[e] + hxan[e] <=> h[c] + hxan[c]	0		HXANt2r	h[e] + hxan[e] <=> h[c] + hxan[c]	0		HXANt2r	h[e] + hxan[e] <=> h[c] + hxan[c]	0		HXANt2r	h[e] + hxan[e] <=> h[c] + hxan[c]	0
ILEabc	h2o[c] + atp[c] + ile-L[e] -> ile-L[c] + pi[c] + h[c] + adp[c]	0		ILEabc	h2o[c] + atp[c] + ile-L[e] -> ile-L[c] + pi[c] + h[c] + adp[c]	0		ILEabc	h2o[c] + atp[c] + ile-L[e] -> ile-L[c] + pi[c] + h[c] + adp[c]	0		ILEabc	h2o[c] + atp[c] + ile-L[e] -> ile-L[c] + pi[c] + h[c] + adp[c]	0		ILEabc	h2o[c] + atp[c] + ile-L[e] -> ile-L[c] + pi[c] + h[c] + adp[c]	0		ILEabc	h2o[c] + atp[c] + ile-L[e] -> ile-L[c] + pi[c] + h[c] + adp[c]	0
ISTNTabc	h2o[c] + atp[c] + istnt[e] -> pi[c] + h[c] + adp[c] + istnt[c]	0		ISTNTabc	h2o[c] + atp[c] + istnt[e] -> pi[c] + h[c] + adp[c] + istnt[c]	0		ISTNTabc	h2o[c] + atp[c] + istnt[e] -> pi[c] + h[c] + adp[c] + istnt[c]	0		ISTNTabc	h2o[c] + atp[c] + istnt[e] -> pi[c] + h[c] + adp[c] + istnt[c]	0		ISTNTabc	h2o[c] + atp[c] + istnt[e] -> pi[c] + h[c] + adp[c] + istnt[c]	0		ISTNTabc	h2o[c] + atp[c] + istnt[e] -> pi[c] + h[c] + adp[c] + istnt[c]	0
Kt3	k[c] + h[e] <=> h[c] + k[e]	-0.0818836		Kt3	k[c] + h[e] <=> h[c] + k[e]	-0.0958281		Kt3	k[c] + h[e] <=> h[c] + k[e]	-0.0568981		Kt3	k[c] + h[e] <=> h[c] + k[e]	-0.0190362		Kt3	k[c] + h[e] <=> h[c] + k[e]	-0.0491267		Kt3	k[c] + h[e] <=> h[c] + k[e]	-0.0118676
LCYSTabc	h2o[c] + atp[c] + Lcyst[e] -> pi[c] + h[c] + adp[c] + Lcyst[c]	0		LCYSTabc	h2o[c] + atp[c] + Lcyst[e] -> pi[c] + h[c] + adp[c] + Lcyst[c]	0		LCYSTabc	h2o[c] + atp[c] + Lcyst[e] -> pi[c] + h[c] + adp[c] + Lcyst[c]	0		LCYSTabc	h2o[c] + atp[c] + Lcyst[e] -> pi[c] + h[c] + adp[c] + Lcyst[c]	0		LCYSTabc	h2o[c] + atp[c] + Lcyst[e] -> pi[c] + h[c] + adp[c] + Lcyst[c]	0		LCYSTabc	h2o[c] + atp[c] + Lcyst[e] -> pi[c] + h[c] + adp[c] + Lcyst[c]	0
LEUabc	h2o[c] + atp[c] + leu-L[e] -> leu-L[c] + pi[c] + h[c] + adp[c]	0		LEUabc	h2o[c] + atp[c] + leu-L[e] -> leu-L[c] + pi[c] + h[c] + adp[c]	0		LEUabc	h2o[c] + atp[c] + leu-L[e] -> leu-L[c] + pi[c] + h[c] + adp[c]	0		LEUabc	h2o[c] + atp[c] + leu-L[e] -> leu-L[c] + pi[c] + h[c] + adp[c]	0		LEUabc	h2o[c] + atp[c] + leu-L[e] -> leu-L[c] + pi[c] + h[c] + adp[c]	0		LEUabc	h2o[c] + atp[c] + leu-L[e] -> leu-L[c] + pi[c] + h[c] + adp[c]	0
L-LACt2	h[e] + lac-L[e] <=> h[c] + lac-L[c]	0		L-LACt2	h[e] + lac-L[e] <=> h[c] + lac-L[c]	0		L-LACt2	h[e] + lac-L[e] <=> h[c] + lac-L[c]	0		L-LACt2	h[e] + lac-L[e] <=> h[c] + lac-L[c]	0		L-LACt2	h[e] + lac-L[e] <=> h[c] + lac-L[c]	0		L-LACt2	h[e] + lac-L[e] <=> h[c] + lac-L[c]	0
LYSt3r	lys-L[c] + h[e] <=> h[c] + lys-L[e]	0		LYSt3r	lys-L[c] + h[e] <=> h[c] + lys-L[e]	0		LYSt3r	lys-L[c] + h[e] <=> h[c] + lys-L[e]	0		LYSt3r	lys-L[c] + h[e] <=> h[c] + lys-L[e]	0		LYSt3r	lys-L[c] + h[e] <=> h[c] + lys-L[e]	0		LYSt3r	lys-L[c] + h[e] <=> h[c] + lys-L[e]	0
METabc	h2o[c] + atp[c] + met-L[e] -> met-L[c] + pi[c] + h[c] + adp[c]	0		METabc	h2o[c] + atp[c] + met-L[e] -> met-L[c] + pi[c] + h[c] + adp[c]	0		METabc	h2o[c] + atp[c] + met-L[e] -> met-L[c] + pi[c] + h[c] + adp[c]	0		METabc	h2o[c] + atp[c] + met-L[e] -> met-L[c] + pi[c] + h[c] + adp[c]	0		METabc	h2o[c] + atp[c] + met-L[e] -> met-L[c] + pi[c] + h[c] + adp[c]	0		METabc	h2o[c] + atp[c] + met-L[e] -> met-L[c] + pi[c] + h[c] + adp[c]	0
METDabc	h2o[c] + atp[c] + met-D[e] -> pi[c] + h[c] + adp[c] + met-D[c]	0		METDabc	h2o[c] + atp[c] + met-D[e] -> pi[c] + h[c] + adp[c] + met-D[c]	0		METDabc	h2o[c] + atp[c] + met-D[e] -> pi[c] + h[c] + adp[c] + met-D[c]	0		METDabc	h2o[c] + atp[c] + met-D[e] -> pi[c] + h[c] + adp[c] + met-D[c]	0		METDabc	h2o[c] + atp[c] + met-D[e] -> pi[c] + h[c] + adp[c] + met-D[c]	0		METDabc	h2o[c] + atp[c] + met-D[e] -> pi[c] + h[c] + adp[c] + met-D[c]	0
METSabc	h2o[c] + atp[c] + metox[e] -> pi[c] + h[c] + adp[c] + metox[c]	0		METSabc	h2o[c] + atp[c] + metox[e] -> pi[c] + h[c] + adp[c] + metox[c]	0		METSabc	h2o[c] + atp[c] + metox[e] -> pi[c] + h[c] + adp[c] + metox[c]	0		METSabc	h2o[c] + atp[c] + metox[e] -> pi[c] + h[c] + adp[c] + metox[c]	0		METSabc	h2o[c] + atp[c] + metox[e] -> pi[c] + h[c] + adp[c] + metox[c]	0		METSabc	h2o[c] + atp[c] + metox[e] -> pi[c] + h[c] + adp[c] + metox[c]	0
METSRabc	h2o[c] + atp[c] + metox-R[e] -> pi[c] + h[c] + adp[c] + metox-R[c]	0		METSRabc	h2o[c] + atp[c] + metox-R[e] -> pi[c] + h[c] + adp[c] + metox-R[c]	0		METSRabc	h2o[c] + atp[c] + metox-R[e] -> pi[c] + h[c] + adp[c] + metox-R[c]	0		METSRabc	h2o[c] + atp[c] + metox-R[e] -> pi[c] + h[c] + adp[c] + metox-R[c]	0		METSRabc	h2o[c] + atp[c] + metox-R[e] -> pi[c] + h[c] + adp[c] + metox-R[c]	0		METSRabc	h2o[c] + atp[c] + metox-R[e] -> pi[c] + h[c] + adp[c] + metox-R[c]	0
MGt5	mg2[e] <=> mg2[c]	0.0117904		MGt5	mg2[e] <=> mg2[c]	0.0137983		MGt5	mg2[e] <=> mg2[c]	0.00819274		MGt5	mg2[e] <=> mg2[c]	0.00274102		MGt5	mg2[e] <=> mg2[c]	0.00707374		MGt5	mg2[e] <=> mg2[c]	0.00170882
MNabc	h2o[c] + atp[c] + mn2[e] -> pi[c] + h[c] + adp[c] + mn2[c]	0		MNabc	h2o[c] + atp[c] + mn2[e] -> pi[c] + h[c] + adp[c] + mn2[c]	0		MNabc	h2o[c] + atp[c] + mn2[e] -> pi[c] + h[c] + adp[c] + mn2[c]	0		MNabc	h2o[c] + atp[c] + mn2[e] -> pi[c] + h[c] + adp[c] + mn2[c]	0		MNabc	h2o[c] + atp[c] + mn2[e] -> pi[c] + h[c] + adp[c] + mn2[c]	0		MNabc	h2o[c] + atp[c] + mn2[e] -> pi[c] + h[c] + adp[c] + mn2[c]	0
MOBDabc	h2o[c] + atp[c] + mobd[e] -> pi[c] + h[c] + adp[c] + mobd[c]	0		MOBDabc	h2o[c] + atp[c] + mobd[e] -> pi[c] + h[c] + adp[c] + mobd[c]	0		MOBDabc	h2o[c] + atp[c] + mobd[e] -> pi[c] + h[c] + adp[c] + mobd[c]	0		MOBDabc	h2o[c] + atp[c] + mobd[e] -> pi[c] + h[c] + adp[c] + mobd[c]	0		MOBDabc	h2o[c] + atp[c] + mobd[e] -> pi[c] + h[c] + adp[c] + mobd[c]	0		MOBDabc	h2o[c] + atp[c] + mobd[e] -> pi[c] + h[c] + adp[c] + mobd[c]	0
MOPSabc	h2o[c] + atp[c] + mops[e] -> pi[c] + h[c] + adp[c] + mops[c]	0		MOPSabc	h2o[c] + atp[c] + mops[e] -> pi[c] + h[c] + adp[c] + mops[c]	0		MOPSabc	h2o[c] + atp[c] + mops[e] -> pi[c] + h[c] + adp[c] + mops[c]	0		MOPSabc	h2o[c] + atp[c] + mops[e] -> pi[c] + h[c] + adp[c] + mops[c]	0		MOPSabc	h2o[c] + atp[c] + mops[e] -> pi[c] + h[c] + adp[c] + mops[c]	0		MOPSabc	h2o[c] + atp[c] + mops[e] -> pi[c] + h[c] + adp[c] + mops[c]	0
MSO3abc	h2o[c] + atp[c] + mso3[e] -> pi[c] + h[c] + adp[c] + mso3[c]	0		MSO3abc	h2o[c] + atp[c] + mso3[e] -> pi[c] + h[c] + adp[c] + mso3[c]	0		MSO3abc	h2o[c] + atp[c] + mso3[e] -> pi[c] + h[c] + adp[c] + mso3[c]	0		MSO3abc	h2o[c] + atp[c] + mso3[e] -> pi[c] + h[c] + adp[c] + mso3[c]	0		MSO3abc	h2o[c] + atp[c] + mso3[e] -> pi[c] + h[c] + adp[c] + mso3[c]	0		MSO3abc	h2o[c] + atp[c] + mso3[e] -> pi[c] + h[c] + adp[c] + mso3[c]	0
NH4t	nh4[e] <=> nh4[c]	1.11775		NH4t	nh4[e] <=> nh4[c]	1.30811		NH4t	nh4[e] <=> nh4[c]	0.776689		NH4t	nh4[e] <=> nh4[c]	0.259854		NH4t	nh4[e] <=> nh4[c]	0.670605		NH4t	nh4[e] <=> nh4[c]	0.161999
PB2abc	h2o[c] + atp[c] + Pb[c] -> pi[c] + h[c] + adp[c] + Pb[e]	0		PB2abc	h2o[c] + atp[c] + Pb[c] -> pi[c] + h[c] + adp[c] + Pb[e]	0		PB2abc	h2o[c] + atp[c] + Pb[c] -> pi[c] + h[c] + adp[c] + Pb[e]	0		PB2abc	h2o[c] + atp[c] + Pb[c] -> pi[c] + h[c] + adp[c] + Pb[e]	0		PB2abc	h2o[c] + atp[c] + Pb[c] -> pi[c] + h[c] + adp[c] + Pb[e]	0		PB2abc	h2o[c] + atp[c] + Pb[c] -> pi[c] + h[c] + adp[c] + Pb[e]	0
PIabc	h2o[c] + atp[c] + pi[e] <=> 2 pi[c] + h[c] + adp[c]	0.246992		PIabc	h2o[c] + atp[c] + pi[e] <=> 2 pi[c] + h[c] + adp[c]	0.289055		PIabc	h2o[c] + atp[c] + pi[e] <=> 2 pi[c] + h[c] + adp[c]	0.171626		PIabc	h2o[c] + atp[c] + pi[e] <=> 2 pi[c] + h[c] + adp[c]	0.0574205		PIabc	h2o[c] + atp[c] + pi[e] <=> 2 pi[c] + h[c] + adp[c]	0.148185		PIabc	h2o[c] + atp[c] + pi[e] <=> 2 pi[c] + h[c] + adp[c]	0.0357973
PIt6	pi[c] + h[c] -> h[e] + pi[e]	0		PIt6	pi[c] + h[c] -> h[e] + pi[e]	0		PIt6	pi[c] + h[c] -> h[e] + pi[e]	0		PIt6	pi[c] + h[c] -> h[e] + pi[e]	0		PIt6	pi[c] + h[c] -> h[e] + pi[e]	0		PIt6	pi[c] + h[c] -> h[e] + pi[e]	0
PIt7	3 na1[e] + pi[e] <=> pi[c] + 3 na1[c]	0		PIt7	3 na1[e] + pi[e] <=> pi[c] + 3 na1[c]	0		PIt7	3 na1[e] + pi[e] <=> pi[c] + 3 na1[c]	0		PIt7	3 na1[e] + pi[e] <=> pi[c] + 3 na1[c]	0		PIt7	3 na1[e] + pi[e] <=> pi[c] + 3 na1[c]	0		PIt7	3 na1[e] + pi[e] <=> pi[c] + 3 na1[c]	0
PROt4	na1[e] + pro-L[e] <=> pro-L[c] + na1[c]	0		PROt4	na1[e] + pro-L[e] <=> pro-L[c] + na1[c]	0		PROt4	na1[e] + pro-L[e] <=> pro-L[c] + na1[c]	0		PROt4	na1[e] + pro-L[e] <=> pro-L[c] + na1[c]	0		PROt4	na1[e] + pro-L[e] <=> pro-L[c] + na1[c]	0		PROt4	na1[e] + pro-L[e] <=> pro-L[c] + na1[c]	0
RIBabc	h2o[c] + atp[c] + rib-D[e] -> pi[c] + h[c] + adp[c] + rib-D[c]	0		RIBabc	h2o[c] + atp[c] + rib-D[e] -> pi[c] + h[c] + adp[c] + rib-D[c]	0		RIBabc	h2o[c] + atp[c] + rib-D[e] -> pi[c] + h[c] + adp[c] + rib-D[c]	0		RIBabc	h2o[c] + atp[c] + rib-D[e] -> pi[c] + h[c] + adp[c] + rib-D[c]	0		RIBabc	h2o[c] + atp[c] + rib-D[e] -> pi[c] + h[c] + adp[c] + rib-D[c]	0		RIBabc	h2o[c] + atp[c] + rib-D[e] -> pi[c] + h[c] + adp[c] + rib-D[c]	0
SO4t2	h[e] + so4[e] <=> h[c] + so4[c]	0		SO4t2	h[e] + so4[e] <=> h[c] + so4[c]	0		SO4t2	h[e] + so4[e] <=> h[c] + so4[c]	0		SO4t2	h[e] + so4[e] <=> h[c] + so4[c]	0		SO4t2	h[e] + so4[e] <=> h[c] + so4[c]	0		SO4t2	h[e] + so4[e] <=> h[c] + so4[c]	0
SPMDabc	h2o[c] + atp[c] + spmd[e] -> pi[c] + h[c] + adp[c] + spmd[c]	0		SPMDabc	h2o[c] + atp[c] + spmd[e] -> pi[c] + h[c] + adp[c] + spmd[c]	0		SPMDabc	h2o[c] + atp[c] + spmd[e] -> pi[c] + h[c] + adp[c] + spmd[c]	0		SPMDabc	h2o[c] + atp[c] + spmd[e] -> pi[c] + h[c] + adp[c] + spmd[c]	0		SPMDabc	h2o[c] + atp[c] + spmd[e] -> pi[c] + h[c] + adp[c] + spmd[c]	0		SPMDabc	h2o[c] + atp[c] + spmd[e] -> pi[c] + h[c] + adp[c] + spmd[c]	0
SULAabc	h2o[c] + atp[c] + sula[e] -> pi[c] + h[c] + adp[c] + sula[c]	0		SULAabc	h2o[c] + atp[c] + sula[e] -> pi[c] + h[c] + adp[c] + sula[c]	0		SULAabc	h2o[c] + atp[c] + sula[e] -> pi[c] + h[c] + adp[c] + sula[c]	0		SULAabc	h2o[c] + atp[c] + sula[e] -> pi[c] + h[c] + adp[c] + sula[c]	0		SULAabc	h2o[c] + atp[c] + sula[e] -> pi[c] + h[c] + adp[c] + sula[c]	0		SULAabc	h2o[c] + atp[c] + sula[e] -> pi[c] + h[c] + adp[c] + sula[c]	0
TAURabc	h2o[c] + atp[c] + taur[e] -> pi[c] + h[c] + adp[c] + taur[c]	0		TAURabc	h2o[c] + atp[c] + taur[e] -> pi[c] + h[c] + adp[c] + taur[c]	0		TAURabc	h2o[c] + atp[c] + taur[e] -> pi[c] + h[c] + adp[c] + taur[c]	0		TAURabc	h2o[c] + atp[c] + taur[e] -> pi[c] + h[c] + adp[c] + taur[c]	0		TAURabc	h2o[c] + atp[c] + taur[e] -> pi[c] + h[c] + adp[c] + taur[c]	0		TAURabc	h2o[c] + atp[c] + taur[e] -> pi[c] + h[c] + adp[c] + taur[c]	0
VALabc	h2o[c] + atp[c] + val-L[e] -> val-L[c] + pi[c] + h[c] + adp[c]	0		VALabc	h2o[c] + atp[c] + val-L[e] -> val-L[c] + pi[c] + h[c] + adp[c]	0		VALabc	h2o[c] + atp[c] + val-L[e] -> val-L[c] + pi[c] + h[c] + adp[c]	0		VALabc	h2o[c] + atp[c] + val-L[e] -> val-L[c] + pi[c] + h[c] + adp[c]	0		VALabc	h2o[c] + atp[c] + val-L[e] -> val-L[c] + pi[c] + h[c] + adp[c]	0		VALabc	h2o[c] + atp[c] + val-L[e] -> val-L[c] + pi[c] + h[c] + adp[c]	0
XANt2	h[e] + xan[e] <=> h[c] + xan[c]	0		XANt2	h[e] + xan[e] <=> h[c] + xan[c]	0		XANt2	h[e] + xan[e] <=> h[c] + xan[c]	0		XANt2	h[e] + xan[e] <=> h[c] + xan[c]	0		XANt2	h[e] + xan[e] <=> h[c] + xan[c]	0		XANt2	h[e] + xan[e] <=> h[c] + xan[c]	0
XYLabc	h2o[c] + atp[c] + xyl-D[e] -> pi[c] + h[c] + adp[c] + xyl-D[c]	0		XYLabc	h2o[c] + atp[c] + xyl-D[e] -> pi[c] + h[c] + adp[c] + xyl-D[c]	0		XYLabc	h2o[c] + atp[c] + xyl-D[e] -> pi[c] + h[c] + adp[c] + xyl-D[c]	3		XYLabc	h2o[c] + atp[c] + xyl-D[e] -> pi[c] + h[c] + adp[c] + xyl-D[c]	0		XYLabc	h2o[c] + atp[c] + xyl-D[e] -> pi[c] + h[c] + adp[c] + xyl-D[c]	0		XYLabc	h2o[c] + atp[c] + xyl-D[e] -> pi[c] + h[c] + adp[c] + xyl-D[c]	0
ZNabc	h2o[c] + atp[c] + zn2[e] -> pi[c] + h[c] + adp[c] + zn2[c]	0		ZNabc	h2o[c] + atp[c] + zn2[e] -> pi[c] + h[c] + adp[c] + zn2[c]	0		ZNabc	h2o[c] + atp[c] + zn2[e] -> pi[c] + h[c] + adp[c] + zn2[c]	0		ZNabc	h2o[c] + atp[c] + zn2[e] -> pi[c] + h[c] + adp[c] + zn2[c]	0		ZNabc	h2o[c] + atp[c] + zn2[e] -> pi[c] + h[c] + adp[c] + zn2[c]	0		ZNabc	h2o[c] + atp[c] + zn2[e] -> pi[c] + h[c] + adp[c] + zn2[c]	0
ACt2r	ac[e] + h[e] <=> h[c] + ac[c]	-6.64169		ACt2r	ac[e] + h[e] <=> h[c] + ac[c]	-6.24008		ACt2r	ac[e] + h[e] <=> h[c] + ac[c]	-5.86129		ACt2r	ac[e] + h[e] <=> h[c] + ac[c]	-1.89114		ACt2r	ac[e] + h[e] <=> h[c] + ac[c]	-1.92872		ACt2r	ac[e] + h[e] <=> h[c] + ac[c]	-9.7616
NACt	nac[e] <=> nac[c]	0.00573869		NACt	nac[e] <=> nac[c]	0.00671598		NACt	nac[e] <=> nac[c]	0.00398762		NACt	nac[e] <=> nac[c]	0.00133412		NACt	nac[e] <=> nac[c]	0.00344297		NACt	nac[e] <=> nac[c]	0.000831725
ATPM	h2o[c] + atp[c] ,- pi[c] + h[c] + adp[c]	0.12		ATPM	h2o[c] + atp[c] ,- pi[c] + h[c] + adp[c]	0.12		ATPM	h2o[c] + atp[c] ,- pi[c] + h[c] + adp[c]	0.12		ATPM	h2o[c] + atp[c] ,- pi[c] + h[c] + adp[c]	0.12		ATPM	h2o[c] + atp[c] ,- pi[c] + h[c] + adp[c]	0.12		ATPM	h2o[c] + atp[c] -> pi[c] + h[c] + adp[c]	0.12
FDH	nadph[c] + co2[c] -> nadp[c] + for[c]	2.35185		FDH	nadph[c] + co2[c] -> nadp[c] + for[c]	2.24147		FDH	nadph[c] + co2[c] -> nadp[c] + for[c]	2.04962		FDH	nadph[c] + co2[c] -> nadp[c] + for[c]	2.28872		FDH	nadph[c] + co2[c] -> nadp[c] + for[c]	2.95474		FDH	nadph[c] + co2[c] -> nadp[c] + for[c]	0.00945896
FTHFL	atp[c] + thf[c] + for[c] -> 10fthf[c] + pi[c] + adp[c]	2.35289		FTHFL	atp[c] + thf[c] + for[c] -> 10fthf[c] + pi[c] + adp[c]	2.24269		FTHFL	atp[c] + thf[c] + for[c] -> 10fthf[c] + pi[c] + adp[c]	2.05035		FTHFL	atp[c] + thf[c] + for[c] -> 10fthf[c] + pi[c] + adp[c]	2.28896		FTHFL	atp[c] + thf[c] + for[c] -> 10fthf[c] + pi[c] + adp[c]	2.95537		FTHFL	atp[c] + thf[c] + for[c] -> 10fthf[c] + pi[c] + adp[c]	0.00961019
MTHFC	10fthf[c] + h[c] -> h2o[c] + methf[c]	2.28658		MTHFC	10fthf[c] + h[c] -> h2o[c] + methf[c]	2.16509		MTHFC	10fthf[c] + h[c] -> h2o[c] + methf[c]	2.00427		MTHFC	10fthf[c] + h[c] -> h2o[c] + methf[c]	2.27354		MTHFC	10fthf[c] + h[c] -> h2o[c] + methf[c]	2.91558		MTHFC	10fthf[c] + h[c] -> h2o[c] + methf[c]	0
MTHFD	nadph[c] + methf[c] -> mlthf[c] + nadp[c]	2.28658		MTHFD	nadph[c] + methf[c] -> mlthf[c] + nadp[c]	2.16509		MTHFD	nadph[c] + methf[c] -> mlthf[c] + nadp[c]	2.00427		MTHFD	nadph[c] + methf[c] -> mlthf[c] + nadp[c]	2.27354		MTHFD	nadph[c] + methf[c] -> mlthf[c] + nadp[c]	2.91558		MTHFD	nadph[c] + methf[c] -> mlthf[c] + nadp[c]	0
MTHFR	mlthf[c] + h[c] + 2 nadh[c] + fdxox[c] <=> 5mthf[c] + 2 nad[c] + fdxrd[c]	2.35349		MTHFR	mlthf[c] + h[c] + 2 nadh[c] + fdxox[c] <=> 5mthf[c] + 2 nad[c] + fdxrd[c]	2.24339		MTHFR	mlthf[c] + h[c] + 2 nadh[c] + fdxox[c] <=> 5mthf[c] + 2 nad[c] + fdxrd[c]	2.05076		MTHFR	mlthf[c] + h[c] + 2 nadh[c] + fdxox[c] <=> 5mthf[c] + 2 nad[c] + fdxrd[c]	2.2891		MTHFR	mlthf[c] + h[c] + 2 nadh[c] + fdxox[c] <=> 5mthf[c] + 2 nad[c] + fdxrd[c]	2.95572		MTHFR	mlthf[c] + h[c] + 2 nadh[c] + fdxox[c] <=> 5mthf[c] + 2 nad[c] + fdxrd[c]	0.00969674
FRHD	3 h[c] + 2 fdxrd[c] <=> h[e] + 2 fdxox[c] + h2[c]	8.76363		FRHD	3 h[c] + 2 fdxrd[c] <=> h[e] + 2 fdxox[c] + h2[c]	8.21248		FRHD	3 h[c] + 2 fdxrd[c] <=> h[e] + 2 fdxox[c] + h2[c]	7.75116		FRHD	3 h[c] + 2 fdxrd[c] <=> h[e] + 2 fdxox[c] + h2[c]	9.73243		FRHD	3 h[c] + 2 fdxrd[c] <=> h[e] + 2 fdxox[c] + h2[c]	27.3095		FRHD	3 h[c] + 2 fdxrd[c] <=> h[e] + 2 fdxox[c] + h2[c]	-42.3344
MMTR	h[c] + meoh[c] + thf[c] -> h2o[c] + 5mthf[c]	0		MMTR	h[c] + meoh[c] + thf[c] -> h2o[c] + 5mthf[c]	0		MMTR	h[c] + meoh[c] + thf[c] -> h2o[c] + 5mthf[c]	0		MMTR	h[c] + meoh[c] + thf[c] -> h2o[c] + 5mthf[c]	0		MMTR	h[c] + meoh[c] + thf[c] -> h2o[c] + 5mthf[c]	0		MMTR	h[c] + meoh[c] + thf[c] -> h2o[c] + 5mthf[c]	10
MTRCFSP	5mthf[c] + cfesp[c] <=> thf[c] + mcfesp[c]	2.34151		MTRCFSP	5mthf[c] + cfesp[c] <=> thf[c] + mcfesp[c]	2.22937		MTRCFSP	5mthf[c] + cfesp[c] <=> thf[c] + mcfesp[c]	2.04244		MTRCFSP	5mthf[c] + cfesp[c] <=> thf[c] + mcfesp[c]	2.28631		MTRCFSP	5mthf[c] + cfesp[c] <=> thf[c] + mcfesp[c]	2.94854		MTRCFSP	5mthf[c] + cfesp[c] <=> thf[c] + mcfesp[c]	10.008
CODH	h2o[c] + co[c] + 2 fdxox[c] -> 2 h[c] + co2[c] + 2 fdxrd[c]	0		CODH	h2o[c] + co[c] + 2 fdxox[c] -> 2 h[c] + co2[c] + 2 fdxrd[c]	0		CODH	h2o[c] + co[c] + 2 fdxox[c] -> 2 h[c] + co2[c] + 2 fdxrd[c]	0		CODH	h2o[c] + co[c] + 2 fdxox[c] -> 2 h[c] + co2[c] + 2 fdxrd[c]	0		CODH	h2o[c] + co[c] + 2 fdxox[c] -> 2 h[c] + co2[c] + 2 fdxrd[c]	14		CODH	h2o[c] + co[c] + 2 fdxox[c] -> 2 h[c] + co2[c] + 2 fdxrd[c]	0
CODH_ACS	coa[c] + 2 h[c] + co2[c] + fdxrd[c] + mcfesp[c] -> h2o[c] + accoa[c] + fdxox[c] + cfesp[c]	2.34151		CODH_ACS	coa[c] + 2 h[c] + co2[c] + fdxrd[c] + mcfesp[c] -> h2o[c] + accoa[c] + fdxox[c] + cfesp[c]	2.22937		CODH_ACS	coa[c] + 2 h[c] + co2[c] + fdxrd[c] + mcfesp[c] -> h2o[c] + accoa[c] + fdxox[c] + cfesp[c]	2.04244		CODH_ACS	coa[c] + 2 h[c] + co2[c] + fdxrd[c] + mcfesp[c] -> h2o[c] + accoa[c] + fdxox[c] + cfesp[c]	2.28631		CODH_ACS	coa[c] + 2 h[c] + co2[c] + fdxrd[c] + mcfesp[c] -> h2o[c] + accoa[c] + fdxox[c] + cfesp[c]	2.94854		CODH_ACS	coa[c] + 2 h[c] + co2[c] + fdxrd[c] + mcfesp[c] -> h2o[c] + accoa[c] + fdxox[c] + cfesp[c]	10.008
ACS	atp[c] + coa[c] + h[c] + ac[c] -> amp[c] + accoa[c] + ppi[c]	0		ACS	atp[c] + coa[c] + h[c] + ac[c] -> amp[c] + accoa[c] + ppi[c]	0		ACS	atp[c] + coa[c] + h[c] + ac[c] -> amp[c] + accoa[c] + ppi[c]	0		ACS	atp[c] + coa[c] + h[c] + ac[c] -> amp[c] + accoa[c] + ppi[c]	0		ACS	atp[c] + coa[c] + h[c] + ac[c] -> amp[c] + accoa[c] + ppi[c]	0		ACS	atp[c] + coa[c] + h[c] + ac[c] -> amp[c] + accoa[c] + ppi[c]	0
PFOR	accoa[c] + 2 h[c] + co2[c] + 2 fdxrd[c] <=> coa[c] + pyr[c] + 2 fdxox[c]	-4.67651		PFOR	accoa[c] + 2 h[c] + co2[c] + 2 fdxrd[c] <=> coa[c] + pyr[c] + 2 fdxox[c]	-4.45112		PFOR	accoa[c] + 2 h[c] + co2[c] + 2 fdxrd[c] <=> coa[c] + pyr[c] + 2 fdxox[c]	-4.08035		PFOR	accoa[c] + 2 h[c] + co2[c] + 2 fdxrd[c] <=> coa[c] + pyr[c] + 2 fdxox[c]	0.307684		PFOR	accoa[c] + 2 h[c] + co2[c] + 2 fdxrd[c] <=> coa[c] + pyr[c] + 2 fdxox[c]	0.79404		PFOR	accoa[c] + 2 h[c] + co2[c] + 2 fdxrd[c] <=> coa[c] + pyr[c] + 2 fdxox[c]	0.191818
PTAr	accoa[c] + pi[c] <=> coa[c] + actp[c]	6.5882		PTAr	accoa[c] + pi[c] <=> coa[c] + actp[c]	6.17748		PTAr	accoa[c] + pi[c] <=> coa[c] + actp[c]	5.82413		PTAr	accoa[c] + pi[c] <=> coa[c] + actp[c]	1.87871		PTAr	accoa[c] + pi[c] <=> coa[c] + actp[c]	1.89663		PTAr	accoa[c] + pi[c] <=> coa[c] + actp[c]	9.75385
ACKr	adp[c] + actp[c] <=> atp[c] + ac[c]	6.5882		ACKr	adp[c] + actp[c] <=> atp[c] + ac[c]	6.17748		ACKr	adp[c] + actp[c] <=> atp[c] + ac[c]	5.82413		ACKr	adp[c] + actp[c] <=> atp[c] + ac[c]	1.87871		ACKr	adp[c] + actp[c] <=> atp[c] + ac[c]	1.89663		ACKr	adp[c] + actp[c] <=> atp[c] + ac[c]	9.75385
HDH1	nadp[c] + h2[c] -> nadph[c] + 2 h[c]	0		HDH1	nadp[c] + h2[c] -> nadph[c] + 2 h[c]	0		HDH1	nadp[c] + h2[c] -> nadph[c] + 2 h[c]	0		HDH1	nadp[c] + h2[c] -> nadph[c] + 2 h[c]	0		HDH1	nadp[c] + h2[c] -> nadph[c] + 2 h[c]	0		HDH1	nadp[c] + h2[c] -> nadph[c] + 2 h[c]	21.0382
HYDFDNr	nad[c] + 2 fdxox[c] + 2 h2[c] <=> 3 h[c] + nadh[c] + 2 fdxrd[c]	4.38181		HYDFDNr	nad[c] + 2 fdxox[c] + 2 h2[c] <=> 3 h[c] + nadh[c] + 2 fdxrd[c]	4.10624		HYDFDNr	nad[c] + 2 fdxox[c] + 2 h2[c] <=> 3 h[c] + nadh[c] + 2 fdxrd[c]	3.87558		HYDFDNr	nad[c] + 2 fdxox[c] + 2 h2[c] <=> 3 h[c] + nadh[c] + 2 fdxrd[c]	9.86621		HYDFDNr	nad[c] + 2 fdxox[c] + 2 h2[c] <=> 3 h[c] + nadh[c] + 2 fdxrd[c]	13.6547		HYDFDNr	nad[c] + 2 fdxox[c] + 2 h2[c] <=> 3 h[c] + nadh[c] + 2 fdxrd[c]	-31.6863
FRNDPRr	2 nadph[c] + nad[c] + fdxox[c] <=> 2 nadp[c] + h[c] + nadh[c] + fdxrd[c]	-0.601596		FRNDPRr	2 nadph[c] + nad[c] + fdxox[c] <=> 2 nadp[c] + h[c] + nadh[c] + fdxrd[c]	-0.704046		FRNDPRr	2 nadph[c] + nad[c] + fdxox[c] <=> 2 nadp[c] + h[c] + nadh[c] + fdxrd[c]	-0.418028		FRNDPRr	2 nadph[c] + nad[c] + fdxox[c] <=> 2 nadp[c] + h[c] + nadh[c] + fdxrd[c]	0.344956		FRNDPRr	2 nadph[c] + nad[c] + fdxox[c] <=> 2 nadp[c] + h[c] + nadh[c] + fdxrd[c]	0.890227		FRNDPRr	2 nadph[c] + nad[c] + fdxox[c] <=> 2 nadp[c] + h[c] + nadh[c] + fdxrd[c]	-10.9144
MECDPDH2	nadh[c] + 2mecdp[c] -> h2o[c] + nad[c] + h2mb4p[c]	0.000649226		MECDPDH2	nadh[c] + 2mecdp[c] -> h2o[c] + nad[c] + h2mb4p[c]	0.000759787		MECDPDH2	nadh[c] + 2mecdp[c] -> h2o[c] + nad[c] + h2mb4p[c]	0.000451124		MECDPDH2	nadh[c] + 2mecdp[c] -> h2o[c] + nad[c] + h2mb4p[c]	0.000150931		MECDPDH2	nadh[c] + 2mecdp[c] -> h2o[c] + nad[c] + h2mb4p[c]	0.000389508		MECDPDH2	nadh[c] + 2mecdp[c] -> h2o[c] + nad[c] + h2mb4p[c]	9.40942e-05
DDPGA	4h2oglt[c] <=> pyr[c] + glx[c]	0		DDPGA	4h2oglt[c] <=> pyr[c] + glx[c]	0		DDPGA	4h2oglt[c] <=> pyr[c] + glx[c]	0		DDPGA	4h2oglt[c] <=> pyr[c] + glx[c]	0		DDPGA	4h2oglt[c] <=> pyr[c] + glx[c]	0		DDPGA	4h2oglt[c] <=> pyr[c] + glx[c]	0
E4PD	h2o[c] + nad[c] + e4p[c] <=> 2 h[c] + nadh[c] + 4per[c]	0		E4PD	h2o[c] + nad[c] + e4p[c] <=> 2 h[c] + nadh[c] + 4per[c]	0		E4PD	h2o[c] + nad[c] + e4p[c] <=> 2 h[c] + nadh[c] + 4per[c]	0		E4PD	h2o[c] + nad[c] + e4p[c] <=> 2 h[c] + nadh[c] + 4per[c]	0		E4PD	h2o[c] + nad[c] + e4p[c] <=> 2 h[c] + nadh[c] + 4per[c]	0		E4PD	h2o[c] + nad[c] + e4p[c] <=> 2 h[c] + nadh[c] + 4per[c]	0
EDA	2ddg6p[c] <=> pyr[c] + g3p[c]	0		EDA	2ddg6p[c] <=> pyr[c] + g3p[c]	0		EDA	2ddg6p[c] <=> pyr[c] + g3p[c]	0		EDA	2ddg6p[c] <=> pyr[c] + g3p[c]	0		EDA	2ddg6p[c] <=> pyr[c] + g3p[c]	0		EDA	2ddg6p[c] <=> pyr[c] + g3p[c]	0
GTPDK	atp[c] + gtp[c] <=> amp[c] + gdptp[c]	0		GTPDK	atp[c] + gtp[c] <=> amp[c] + gdptp[c]	0		GTPDK	atp[c] + gtp[c] <=> amp[c] + gdptp[c]	0		GTPDK	atp[c] + gtp[c] <=> amp[c] + gdptp[c]	0		GTPDK	atp[c] + gtp[c] <=> amp[c] + gdptp[c]	0		GTPDK	atp[c] + gtp[c] <=> amp[c] + gdptp[c]	0
PGDH	nadp[c] + 6pgc[c] -> nadph[c] + co2[c] + ru5p-D[c]	0		PGDH	nadp[c] + 6pgc[c] -> nadph[c] + co2[c] + ru5p-D[c]	0		PGDH	nadp[c] + 6pgc[c] -> nadph[c] + co2[c] + ru5p-D[c]	0		PGDH	nadp[c] + 6pgc[c] -> nadph[c] + co2[c] + ru5p-D[c]	0		PGDH	nadp[c] + 6pgc[c] -> nadph[c] + co2[c] + ru5p-D[c]	0		PGDH	nadp[c] + 6pgc[c] -> nadph[c] + co2[c] + ru5p-D[c]	0
RPE	ru5p-D[c] <=> xu5p-D[c]	-0.0882347		RPE	ru5p-D[c] <=> xu5p-D[c]	-0.103261		RPE	ru5p-D[c] <=> xu5p-D[c]	-1.06131		RPE	ru5p-D[c] <=> xu5p-D[c]	-0.0205127		RPE	ru5p-D[c] <=> xu5p-D[c]	-0.0529371		RPE	ru5p-D[c] <=> xu5p-D[c]	-0.0127881
RPI	r5p[c] <=> ru5p-D[c]	-0.087771		RPI	r5p[c] <=> ru5p-D[c]	-0.102718		RPI	r5p[c] <=> ru5p-D[c]	-1.06099		RPI	r5p[c] <=> ru5p-D[c]	-0.0204049		RPI	r5p[c] <=> ru5p-D[c]	-0.0526589		RPI	r5p[c] <=> ru5p-D[c]	-0.0127209
TALA	g3p[c] + s7p[c] <=> e4p[c] + f6p[c]	-0.025684		TALA	g3p[c] + s7p[c] <=> e4p[c] + f6p[c]	-0.0300579		TALA	g3p[c] + s7p[c] <=> e4p[c] + f6p[c]	-0.910086		TALA	g3p[c] + s7p[c] <=> e4p[c] + f6p[c]	-0.00597098		TALA	g3p[c] + s7p[c] <=> e4p[c] + f6p[c]	-0.0154093		TALA	g3p[c] + s7p[c] <=> e4p[c] + f6p[c]	-0.00372246
TKT1	g3p[c] + s7p[c] <=> xu5p-D[c] + r5p[c]	0.025684		TKT1	g3p[c] + s7p[c] <=> xu5p-D[c] + r5p[c]	0.0300579		TKT1	g3p[c] + s7p[c] <=> xu5p-D[c] + r5p[c]	-0.982153		TKT1	g3p[c] + s7p[c] <=> xu5p-D[c] + r5p[c]	0.00597098		TKT1	g3p[c] + s7p[c] <=> xu5p-D[c] + r5p[c]	0.0154093		TKT1	g3p[c] + s7p[c] <=> xu5p-D[c] + r5p[c]	0.00372246
TKT2	g3p[c] + f6p[c] <=> xu5p-D[c] + e4p[c]	0.0625507		TKT2	g3p[c] + f6p[c] <=> xu5p-D[c] + e4p[c]	0.073203		TKT2	g3p[c] + f6p[c] <=> xu5p-D[c] + e4p[c]	-0.956536		TKT2	g3p[c] + f6p[c] <=> xu5p-D[c] + e4p[c]	0.0145417		TKT2	g3p[c] + f6p[c] <=> xu5p-D[c] + e4p[c]	0.0375278		TKT2	g3p[c] + f6p[c] <=> xu5p-D[c] + e4p[c]	0.00906566
G6PI	g6p[c] <=> g6p-B[c]	-1000		G6PI	g6p[c] <=> g6p-B[c]	-1000		G6PI	g6p[c] <=> g6p-B[c]	-1000		G6PI	g6p[c] <=> g6p-B[c]	-1000		G6PI	g6p[c] <=> g6p-B[c]	1000		G6PI	g6p[c] <=> g6p-B[c]	-1000
HEX1	atp[c] + glc-D[c] <=> h[c] + adp[c] + g6p[c]	3		HEX1	atp[c] + glc-D[c] <=> h[c] + adp[c] + g6p[c]	0		HEX1	atp[c] + glc-D[c] <=> h[c] + adp[c] + g6p[c]	0		HEX1	atp[c] + glc-D[c] <=> h[c] + adp[c] + g6p[c]	0		HEX1	atp[c] + glc-D[c] <=> h[c] + adp[c] + g6p[c]	0		HEX1	atp[c] + glc-D[c] <=> h[c] + adp[c] + g6p[c]	0
PGMT	g1p[c] <=> g6p[c]	-0.0290065		PGMT	g1p[c] <=> g6p[c]	-0.0339462		PGMT	g1p[c] <=> g6p[c]	-0.0201556		PGMT	g1p[c] <=> g6p[c]	-0.00674339		PGMT	g1p[c] <=> g6p[c]	-0.0174027		PGMT	g1p[c] <=> g6p[c]	-0.00420399
PGI	g6p[c] <=> f6p[c]	2.97099		PGI	g6p[c] <=> f6p[c]	-0.0339462		PGI	g6p[c] <=> f6p[c]	-0.0201556		PGI	g6p[c] <=> f6p[c]	-0.00674339		PGI	g6p[c] <=> f6p[c]	-0.0174027		PGI	g6p[c] <=> f6p[c]	-0.00420399
FBP	h2o[c] + fdp[c] -> pi[c] + h[c] + f6p[c]	0		FBP	h2o[c] + fdp[c] -> pi[c] + h[c] + f6p[c]	0.181492		FBP	h2o[c] + fdp[c] -> pi[c] + h[c] + f6p[c]	0		FBP	h2o[c] + fdp[c] -> pi[c] + h[c] + f6p[c]	0.0360532		FBP	h2o[c] + fdp[c] -> pi[c] + h[c] + f6p[c]	0.0930425		FBP	h2o[c] + fdp[c] -> pi[c] + h[c] + f6p[c]	0.0224765
PFK_1	atp[c] + f6p[c] -> h[c] + adp[c] + fdp[c]	2.84492		PFK_1	atp[c] + f6p[c] -> h[c] + adp[c] + fdp[c]	0		PFK_1	atp[c] + f6p[c] -> h[c] + adp[c] + fdp[c]	0		PFK_1	atp[c] + f6p[c] -> h[c] + adp[c] + fdp[c]	0		PFK_1	atp[c] + f6p[c] -> h[c] + adp[c] + fdp[c]	0		PFK_1	atp[c] + f6p[c] -> h[c] + adp[c] + fdp[c]	0
PFK_2	atp[c] + tag6p-D[c] -> h[c] + adp[c] + tagdp-D[c]	0		PFK_2	atp[c] + tag6p-D[c] -> h[c] + adp[c] + tagdp-D[c]	0		PFK_2	atp[c] + tag6p-D[c] -> h[c] + adp[c] + tagdp-D[c]	0		PFK_2	atp[c] + tag6p-D[c] -> h[c] + adp[c] + tagdp-D[c]	0		PFK_2	atp[c] + tag6p-D[c] -> h[c] + adp[c] + tagdp-D[c]	0		PFK_2	atp[c] + tag6p-D[c] -> h[c] + adp[c] + tagdp-D[c]	0
PFK_3	atp[c] + s7p[c] -> h[c] + adp[c] + s17bp[c]	0		PFK_3	atp[c] + s7p[c] -> h[c] + adp[c] + s17bp[c]	0		PFK_3	atp[c] + s7p[c] -> h[c] + adp[c] + s17bp[c]	1.89224		PFK_3	atp[c] + s7p[c] -> h[c] + adp[c] + s17bp[c]	0		PFK_3	atp[c] + s7p[c] -> h[c] + adp[c] + s17bp[c]	0		PFK_3	atp[c] + s7p[c] -> h[c] + adp[c] + s17bp[c]	0
FBA	fdp[c] <=> g3p[c] + dhap[c]	2.84492		FBA	fdp[c] <=> g3p[c] + dhap[c]	2.81851		FBA	fdp[c] <=> g3p[c] + dhap[c]	0		FBA	fdp[c] <=> g3p[c] + dhap[c]	-0.0360532		FBA	fdp[c] <=> g3p[c] + dhap[c]	-0.0930425		FBA	fdp[c] <=> g3p[c] + dhap[c]	-0.0224765
FBA2	f1p[c] <=> dhap[c] + glyald[c]	0		FBA2	f1p[c] <=> dhap[c] + glyald[c]	0		FBA2	f1p[c] <=> dhap[c] + glyald[c]	0		FBA2	f1p[c] <=> dhap[c] + glyald[c]	0		FBA2	f1p[c] <=> dhap[c] + glyald[c]	0		FBA2	f1p[c] <=> dhap[c] + glyald[c]	0
FBA3	s17bp[c] <=> e4p[c] + dhap[c]	0		FBA3	s17bp[c] <=> e4p[c] + dhap[c]	0		FBA3	s17bp[c] <=> e4p[c] + dhap[c]	1.89224		FBA3	s17bp[c] <=> e4p[c] + dhap[c]	0		FBA3	s17bp[c] <=> e4p[c] + dhap[c]	0		FBA3	s17bp[c] <=> e4p[c] + dhap[c]	0
TPI	g3p[c] <=> dhap[c]	-2.77756		TPI	g3p[c] <=> dhap[c]	-2.73968		TPI	g3p[c] <=> dhap[c]	-1.84543		TPI	g3p[c] <=> dhap[c]	0.0517123		TPI	g3p[c] <=> dhap[c]	0.133454		TPI	g3p[c] <=> dhap[c]	0.0322387
GAPD	nad[c] + pi[c] + g3p[c] <=> nadh[c] + 13dpg[c]	5.56459		GAPD	nad[c] + pi[c] + g3p[c] <=> nadh[c] + 13dpg[c]	5.49044		GAPD	nad[c] + pi[c] + g3p[c] <=> nadh[c] + 13dpg[c]	4.69745		GAPD	nad[c] + pi[c] + g3p[c] <=> nadh[c] + 13dpg[c]	-0.101224		GAPD	nad[c] + pi[c] + g3p[c] <=> nadh[c] + 13dpg[c]	-0.261228		GAPD	nad[c] + pi[c] + g3p[c] <=> nadh[c] + 13dpg[c]	-0.0631054
PGK	atp[c] + h[c] + 3pg[c] <=> adp[c] + 13dpg[c]	-5.56459		PGK	atp[c] + h[c] + 3pg[c] <=> adp[c] + 13dpg[c]	-5.49044		PGK	atp[c] + h[c] + 3pg[c] <=> adp[c] + 13dpg[c]	-4.69745		PGK	atp[c] + h[c] + 3pg[c] <=> adp[c] + 13dpg[c]	0.101224		PGK	atp[c] + h[c] + 3pg[c] <=> adp[c] + 13dpg[c]	0.261228		PGK	atp[c] + h[c] + 3pg[c] <=> adp[c] + 13dpg[c]	0.0631054
PGM	2pg[c] <=> 3pg[c]	-5.45602		PGM	2pg[c] <=> 3pg[c]	-5.36339		PGM	2pg[c] <=> 3pg[c]	-4.62201		PGM	2pg[c] <=> 3pg[c]	0.126463		PGM	2pg[c] <=> 3pg[c]	0.326363		PGM	2pg[c] <=> 3pg[c]	0.0788401
ENO	2pg[c] <=> h2o[c] + pep[c]	5.45602		ENO	2pg[c] <=> h2o[c] + pep[c]	5.36339		ENO	2pg[c] <=> h2o[c] + pep[c]	4.62201		ENO	2pg[c] <=> h2o[c] + pep[c]	-0.126463		ENO	2pg[c] <=> h2o[c] + pep[c]	-0.326363		ENO	2pg[c] <=> h2o[c] + pep[c]	-0.0788401
PYK	atp[c] + pyr[c] <=> adp[c] + pep[c]	-5.37049		PYK	atp[c] + pyr[c] <=> adp[c] + pep[c]	-2.26328		PYK	atp[c] + pyr[c] <=> adp[c] + pep[c]	-4.56257		PYK	adp[c] + pep[c] -> atp[c] + pyr[c]	0		PYK	adp[c] + pep[c] -> atp[c] + pyr[c]	0		PYK	adp[c] + pep[c] -> atp[c] + pyr[c]	0
PPCK	atp[c] + oaa[c] -> adp[c] + co2[c] + pep[c]	0		PPCK	atp[c] + oaa[c] -> adp[c] + co2[c] + pep[c]	0		PPCK	atp[c] + oaa[c] -> adp[c] + co2[c] + pep[c]	0		PPCK	atp[c] + oaa[c] -> adp[c] + co2[c] + pep[c]	0.146348		PPCK	atp[c] + oaa[c] -> adp[c] + co2[c] + pep[c]	0.37768		PPCK	atp[c] + oaa[c] -> adp[c] + co2[c] + pep[c]	0
PPDK	atp[c] + pi[c] + pyr[c] -> amp[c] + ppi[c] + h[c] + pep[c]	0		PPDK	atp[c] + pi[c] + pyr[c] -> amp[c] + ppi[c] + h[c] + pep[c]	0		PPDK	atp[c] + pi[c] + pyr[c] -> amp[c] + ppi[c] + h[c] + pep[c]	0		PPDK	atp[c] + pi[c] + pyr[c] -> amp[c] + ppi[c] + h[c] + pep[c]	0		PPDK	atp[c] + pi[c] + pyr[c] -> amp[c] + ppi[c] + h[c] + pep[c]	0		PPDK	atp[c] + pi[c] + pyr[c] -> amp[c] + ppi[c] + h[c] + pep[c]	0.091237
LDH_L	nad[c] + lac-L[c] <=> h[c] + nadh[c] + pyr[c]	0		LDH_L	nad[c] + lac-L[c] <=> h[c] + nadh[c] + pyr[c]	0		LDH_L	nad[c] + lac-L[c] <=> h[c] + nadh[c] + pyr[c]	0		LDH_L	nad[c] + lac-L[c] <=> h[c] + nadh[c] + pyr[c]	0		LDH_L	nad[c] + lac-L[c] <=> h[c] + nadh[c] + pyr[c]	0		LDH_L	nad[c] + lac-L[c] <=> h[c] + nadh[c] + pyr[c]	0
FRUK	atp[c] + f1p[c] <=> adp[c] + fdp[c]	0		FRUK	atp[c] + f1p[c] <=> adp[c] + fdp[c]	3		FRUK	atp[c] + f1p[c] <=> adp[c] + fdp[c]	0		FRUK	atp[c] + f1p[c] <=> adp[c] + fdp[c]	0		FRUK	atp[c] + f1p[c] <=> adp[c] + fdp[c]	0		FRUK	atp[c] + f1p[c] <=> adp[c] + fdp[c]	0
GLYK	atp[c] + glyc[c] -> h[c] + adp[c] + glyc3p[c]	0.000521699		GLYK	atp[c] + glyc[c] -> h[c] + adp[c] + glyc3p[c]	0.000610543		GLYK	atp[c] + glyc[c] -> h[c] + adp[c] + glyc3p[c]	0.000362511		GLYK	atp[c] + glyc[c] -> h[c] + adp[c] + glyc3p[c]	0.000121284		GLYK	atp[c] + glyc[c] -> h[c] + adp[c] + glyc3p[c]	0.000312997		GLYK	atp[c] + glyc[c] -> h[c] + adp[c] + glyc3p[c]	7.56114e-05
PC	atp[c] + pyr[c] + hco3[c] <=> pi[c] + h[c] + adp[c] + oaa[c]	0.325957		PC	atp[c] + pyr[c] + hco3[c] <=> pi[c] + h[c] + adp[c] + oaa[c]	0.381467		PC	atp[c] + pyr[c] + hco3[c] <=> pi[c] + h[c] + adp[c] + oaa[c]	0.226497		PC	atp[c] + pyr[c] + hco3[c] <=> pi[c] + h[c] + adp[c] + oaa[c]	0.222126		PC	atp[c] + pyr[c] + hco3[c] <=> pi[c] + h[c] + adp[c] + oaa[c]	0.573241		PC	atp[c] + pyr[c] + hco3[c] <=> pi[c] + h[c] + adp[c] + oaa[c]	0.047242
CITL	cit[c] -> oaa[c] + ac[c]	0		CITL	cit[c] -> oaa[c] + ac[c]	0		CITL	cit[c] -> oaa[c] + ac[c]	0		CITL	cit[c] -> oaa[c] + ac[c]	0		CITL	cit[c] -> oaa[c] + ac[c]	0		CITL	cit[c] -> oaa[c] + ac[c]	0
CS	h2o[c] + accoa[c] + oaa[c] -> coa[c] + h[c] + cit[c]	0.119655		CS	h2o[c] + accoa[c] + oaa[c] -> coa[c] + h[c] + cit[c]	0.140031		CS	h2o[c] + accoa[c] + oaa[c] -> coa[c] + h[c] + cit[c]	0.0831438		CS	h2o[c] + accoa[c] + oaa[c] -> coa[c] + h[c] + cit[c]	0.0278172		CS	h2o[c] + accoa[c] + oaa[c] -> coa[c] + h[c] + cit[c]	0.0717877		CS	h2o[c] + accoa[c] + oaa[c] -> coa[c] + h[c] + cit[c]	0.0173419
ACONTa	cit[c] <=> h2o[c] + acon-C[c]	0.119655		ACONTa	cit[c] <=> h2o[c] + acon-C[c]	0.140031		ACONTa	cit[c] <=> h2o[c] + acon-C[c]	0.0831438		ACONTa	cit[c] <=> h2o[c] + acon-C[c]	0.0278172		ACONTa	cit[c] <=> h2o[c] + acon-C[c]	0.0717877		ACONTa	cit[c] <=> h2o[c] + acon-C[c]	0.0173419
ACONTb	h2o[c] + acon-C[c] <=> icit[c]	0.119655		ACONTb	h2o[c] + acon-C[c] <=> icit[c]	0.140031		ACONTb	h2o[c] + acon-C[c] <=> icit[c]	0.0831438		ACONTb	h2o[c] + acon-C[c] <=> icit[c]	0.0278172		ACONTb	h2o[c] + acon-C[c] <=> icit[c]	0.0717877		ACONTb	h2o[c] + acon-C[c] <=> icit[c]	0.0173419
ICDHx	nad[c] + icit[c] <=> nadh[c] + co2[c] + akg[c]	0.119655		ICDHx	nad[c] + icit[c] <=> nadh[c] + co2[c] + akg[c]	0.140031		ICDHx	nad[c] + icit[c] <=> nadh[c] + co2[c] + akg[c]	0.0831438		ICDHx	nad[c] + icit[c] <=> nadh[c] + co2[c] + akg[c]	0.0278172		ICDHx	nad[c] + icit[c] <=> nadh[c] + co2[c] + akg[c]	0.0717877		ICDHx	nad[c] + icit[c] <=> nadh[c] + co2[c] + akg[c]	0.0173419
OOR	coa[c] + akg[c] + 2 fdxox[c] <=> succoa[c] + 2 h[c] + co2[c] + 2 fdxrd[c]	0.000115933		OOR	coa[c] + akg[c] + 2 fdxox[c] <=> succoa[c] + 2 h[c] + co2[c] + 2 fdxrd[c]	0.000135676		OOR	coa[c] + akg[c] + 2 fdxox[c] <=> succoa[c] + 2 h[c] + co2[c] + 2 fdxrd[c]	8.05579e-05		OOR	coa[c] + akg[c] + 2 fdxox[c] <=> succoa[c] + 2 h[c] + co2[c] + 2 fdxrd[c]	2.6952e-05		OOR	coa[c] + akg[c] + 2 fdxox[c] <=> succoa[c] + 2 h[c] + co2[c] + 2 fdxrd[c]	6.9555e-05		OOR	coa[c] + akg[c] + 2 fdxox[c] <=> succoa[c] + 2 h[c] + co2[c] + 2 fdxrd[c]	1.68025e-05
SUCOAS	atp[c] + coa[c] + succ[c] <=> succoa[c] + pi[c] + adp[c]	0.0327511		SUCOAS	atp[c] + coa[c] + succ[c] <=> succoa[c] + pi[c] + adp[c]	0.0383285		SUCOAS	atp[c] + coa[c] + succ[c] <=> succoa[c] + pi[c] + adp[c]	0.0227576		SUCOAS	atp[c] + coa[c] + succ[c] <=> succoa[c] + pi[c] + adp[c]	0.00761394		SUCOAS	atp[c] + coa[c] + succ[c] <=> succoa[c] + pi[c] + adp[c]	0.0196493		SUCOAS	atp[c] + coa[c] + succ[c] <=> succoa[c] + pi[c] + adp[c]	0.00474671
FUM	h2o[c] + fum[c] <=> mal-L[c]	-999.908		FUM	h2o[c] + fum[c] <=> mal-L[c]	-999.892		FUM	h2o[c] + fum[c] <=> mal-L[c]	-0.696503		FUM	h2o[c] + fum[c] <=> mal-L[c]	-0.234288		FUM	h2o[c] + fum[c] <=> mal-L[c]	-0.601372		FUM	h2o[c] + fum[c] <=> mal-L[c]	-0.146106
MDH	nad[c] + mal-L[c] <=> h[c] + nadh[c] + oaa[c]	-999.908		MDH	nad[c] + mal-L[c] <=> h[c] + nadh[c] + oaa[c]	-999.892		MDH	nad[c] + mal-L[c] <=> h[c] + nadh[c] + oaa[c]	-0.696503		MDH	nad[c] + mal-L[c] <=> h[c] + nadh[c] + oaa[c]	-0.234288		MDH	nad[c] + mal-L[c] <=> h[c] + nadh[c] + oaa[c]	-0.601372		MDH	nad[c] + mal-L[c] <=> h[c] + nadh[c] + oaa[c]	-0.146106
ME2	nadp[c] + mal-L[c] -> nadph[c] + pyr[c] + co2[c]	0		ME2	nadp[c] + mal-L[c] -> nadph[c] + pyr[c] + co2[c]	0		ME2	nadp[c] + mal-L[c] -> nadph[c] + pyr[c] + co2[c]	0		ME2	nadp[c] + mal-L[c] -> nadph[c] + pyr[c] + co2[c]	0		ME2	nadp[c] + mal-L[c] -> nadph[c] + pyr[c] + co2[c]	0		ME2	nadp[c] + mal-L[c] -> nadph[c] + pyr[c] + co2[c]	0
ME1	nad[c] + mal-L[c] -> nadh[c] + pyr[c] + co2[c]	0		ME1	nad[c] + mal-L[c] -> nadh[c] + pyr[c] + co2[c]	0		ME1	nad[c] + mal-L[c] -> nadh[c] + pyr[c] + co2[c]	0		ME1	nad[c] + mal-L[c] -> nadh[c] + pyr[c] + co2[c]	0		ME1	nad[c] + mal-L[c] -> nadh[c] + pyr[c] + co2[c]	0		ME1	nad[c] + mal-L[c] -> nadh[c] + pyr[c] + co2[c]	0
PSERT	glu-L[c] + 3php[c] -> akg[c] + pser-L[c]	0.108565		PSERT	glu-L[c] + 3php[c] -> akg[c] + pser-L[c]	0.127054		PSERT	glu-L[c] + 3php[c] -> akg[c] + pser-L[c]	0.0754384		PSERT	glu-L[c] + 3php[c] -> akg[c] + pser-L[c]	0.0252392		PSERT	glu-L[c] + 3php[c] -> akg[c] + pser-L[c]	0.0651347		PSERT	glu-L[c] + 3php[c] -> akg[c] + pser-L[c]	0.0157347
GLUTRS	atp[c] + glu-L[c] + h[c] + trnaglu[c] -> amp[c] + ppi[c] + glutrna[c]	0.000927465		GLUTRS	atp[c] + glu-L[c] + h[c] + trnaglu[c] -> amp[c] + ppi[c] + glutrna[c]	0.00108541		GLUTRS	atp[c] + glu-L[c] + h[c] + trnaglu[c] -> amp[c] + ppi[c] + glutrna[c]	0.000644463		GLUTRS	atp[c] + glu-L[c] + h[c] + trnaglu[c] -> amp[c] + ppi[c] + glutrna[c]	0.000215616		GLUTRS	atp[c] + glu-L[c] + h[c] + trnaglu[c] -> amp[c] + ppi[c] + glutrna[c]	0.00055644		GLUTRS	atp[c] + glu-L[c] + h[c] + trnaglu[c] -> amp[c] + ppi[c] + glutrna[c]	0.00013442
GLUTRR	nadph[c] + h[c] + glutrna[c] <=> nadp[c] + trnaglu[c] + glu1sa[c]	0.000927465		GLUTRR	nadph[c] + h[c] + glutrna[c] <=> nadp[c] + trnaglu[c] + glu1sa[c]	0.00108541		GLUTRR	nadph[c] + h[c] + glutrna[c] <=> nadp[c] + trnaglu[c] + glu1sa[c]	0.000644463		GLUTRR	nadph[c] + h[c] + glutrna[c] <=> nadp[c] + trnaglu[c] + glu1sa[c]	0.000215616		GLUTRR	nadph[c] + h[c] + glutrna[c] <=> nadp[c] + trnaglu[c] + glu1sa[c]	0.00055644		GLUTRR	nadph[c] + h[c] + glutrna[c] <=> nadp[c] + trnaglu[c] + glu1sa[c]	0.00013442
G1SAT	5aop[c] <=> glu1sa[c]	-0.000927465		G1SAT	5aop[c] <=> glu1sa[c]	-0.00108541		G1SAT	5aop[c] <=> glu1sa[c]	-0.000644463		G1SAT	5aop[c] <=> glu1sa[c]	-0.000215616		G1SAT	5aop[c] <=> glu1sa[c]	-0.00055644		G1SAT	5aop[c] <=> glu1sa[c]	-0.00013442
PPBNGS	2 5aop[c] -> 2 h2o[c] + h[c] + ppbng[c]	0.000463733		PPBNGS	2 5aop[c] -> 2 h2o[c] + h[c] + ppbng[c]	0.000542705		PPBNGS	2 5aop[c] -> 2 h2o[c] + h[c] + ppbng[c]	0.000322232		PPBNGS	2 5aop[c] -> 2 h2o[c] + h[c] + ppbng[c]	0.000107808		PPBNGS	2 5aop[c] -> 2 h2o[c] + h[c] + ppbng[c]	0.00027822		PPBNGS	2 5aop[c] -> 2 h2o[c] + h[c] + ppbng[c]	6.72101e-05
HMBS	h2o[c] + 4 ppbng[c] -> 4 nh4[c] + hmbil[c]	0.000115933		HMBS	h2o[c] + 4 ppbng[c] -> 4 nh4[c] + hmbil[c]	0.000135676		HMBS	h2o[c] + 4 ppbng[c] -> 4 nh4[c] + hmbil[c]	8.05579e-05		HMBS	h2o[c] + 4 ppbng[c] -> 4 nh4[c] + hmbil[c]	2.6952e-05		HMBS	h2o[c] + 4 ppbng[c] -> 4 nh4[c] + hmbil[c]	6.9555e-05		HMBS	h2o[c] + 4 ppbng[c] -> 4 nh4[c] + hmbil[c]	1.68025e-05
[truncated: 93 more rows]

## Sheet: Table S6
Table S6. Flux variability analysis of M. thermoacetica metabolic model (iAI558) for heterotrophic and autotrophic growth simulations
Growth on glucose				Growth on H2 & CO2
[truncated: 706 more rows]
